# Supplementary material for: Liquid-jet photoemission spectroscopy as a structural tool: site-specific acid–base chemistry of vitamin C
Source: Phys Chem Chem Phys. 2024 Jun 28;26(29):19673–84. doi: 10.1039/d4cp01521e (PMC11267885; doi:10.1039/d4cp01521e)
Supplement: CP-026-D4CP01521E-s001 [file CP-026-D4CP01521E-s001.pdf]

## Electronic Supplementary Information: Liquid-Jet Photoemission Spectroscopy as a Structural Tool: Site-Specific Acid-Base Chemistry of Vitamin C

Lukáš Tomaník,<sup>a‡</sup> Michele Pugini,<sup>b</sup> Karen Mudryk,<sup>b</sup> Stephan Thürmer,<sup>c</sup> Dominik Stemer,<sup>b</sup> Bruno Credidio,<sup>b</sup> Florian Trinter,<sup>b</sup> Bernd Winter,<sup>b§</sup> and Petr Slaviček<sup>a¶</sup>

### 1 Comparison of spectra measured at 400.88 eV and 850 eV photon energy

In Fig. S1, we compare liquid-jet photoemission spectra measured at 400.88 eV photon energy presented in the main text with additional measurements using 850 eV photon energy. The respective kinetic energies of emitted photoelectrons are approx. 105 eV and 455 eV (plus 64 eV from bias), translating into probing of 3–4 and 6 solution layers, respectively. The spectral shapes measured at two different photon energies are very similar, providing essentially identical fitted peak positions. The small discrepancies are attributed to experimental differences in the two measurement campaigns, such as alignment and settings.

### 2 Evaluation of the agreement between experimental and theoretical spectra using Kullback–Leibler (KL) divergence

We provide a quantitative evaluation of the agreement between our modeled and measured liquid-jet photoelectron spectra of vitamin C solutions at different pH values. We use Kullback–Leibler (KL) divergence, measuring how much is one probability distribution different from another. Specifically, we determine how well is the experimental spectrum represented by a calculated one. The lower the KL divergence value, the better represented the spectrum is, with the KL divergence of 0 corresponding to two identical spectra. The calculated values are presented in Tab. S1, confirming our assignment in the main text, *i.e.*, the calculated spectra shown in red in Fig. 3 having the best agreement with the experiment. However, in comparing the experimental spectrum at pH = 7 with modeled spectra for the deprotonation at C2–O<sup>−</sup> and C3–O<sup>−</sup>, we got a lower KL divergence value for C2–O<sup>−</sup> (0.040 vs. 0.071). Nevertheless, we argue that C3–O<sup>−</sup> is the real deprotonation center based on examining the similarity in spectral features: the magnitude of separation between the main and the smaller peak and the appearance of the low-energy shoulder. We show in Tab. S1 in parentheses for those two cases how the results change in favor of C3–O<sup>−</sup> if we shift the experimental spectrum by −0.2 eV to match the position of the main peak with those two calculated spectra.

**Table S1** KL divergence values for comparing the agreement between an experimental spectrum at the indicated pH value and the respective calculated spectrum. Values in parentheses are contained using an experimental spectrum at pH = 7 shifted by −0.2 eV.

| Calculated spectrum                   | KL divergence |
|---------------------------------------|---------------|
| pH = 2                                |               |
| A tautomer                            | 0.014         |
| B tautomer                            | 0.059         |
| pH = 7                                |               |
| C2–O <sup>−</sup>                     | 0.040 (0.073) |
| C3–O <sup>−</sup>                     | 0.071 (0.016) |
| C5–O <sup>−</sup>                     | 0.109         |
| C6–O <sup>−</sup>                     | 0.130         |
| pH = 13                               |               |
| C2–O <sup>−</sup> + C3–O <sup>−</sup> | 0.070         |
| C2–O <sup>−</sup> + C5–O <sup>−</sup> | 0.161         |
| C2–O <sup>−</sup> + C6–O <sup>−</sup> | 0.119         |
| C3–O <sup>−</sup> + C5–O <sup>−</sup> | 0.108         |
| C3–O <sup>−</sup> + C6–O <sup>−</sup> | 0.094         |
| C5–O <sup>−</sup> + C6–O <sup>−</sup> | 0.123         |

### 3 Cartesian coordinates of optimized structures

#### 3.1 Fully protonated molecule of vitamin C

##### A tautomer

|   |           |           |           |
|---|-----------|-----------|-----------|
| C | 1.833065  | 0.670477  | 0.707193  |
| C | 0.915838  | -0.103747 | -0.199674 |
| C | -0.142393 | -0.527446 | 0.501520  |
| C | 0.011848  | -0.077940 | 1.874804  |
| O | 1.169465  | 0.625502  | 1.985642  |
| O | 1.133648  | -0.317669 | -1.502978 |
| O | -1.200485 | -1.257628 | 0.080709  |
| O | -0.734449 | -0.269994 | 2.812072  |
| C | 2.049954  | 2.135344  | 0.308542  |
| C | 3.016700  | 2.822966  | 1.261162  |
| O | 3.323867  | 4.099451  | 0.721887  |
| O | 0.817423  | 2.817154  | 0.193479  |
| H | -1.796575 | -1.407220 | 0.835359  |
| H | 2.797826  | 0.163969  | 0.817201  |
| H | 2.559015  | 2.918376  | 2.254106  |
| H | 3.923980  | 2.213324  | 1.356227  |
| H | 3.905842  | 4.568354  | 1.337646  |
| H | 2.492619  | 2.155374  | -0.692935 |
| H | 0.440798  | 2.947805  | 1.078745  |
| H | 2.003936  | 0.002835  | -1.789838 |

##### B tautomer

|   |           |           |           |
|---|-----------|-----------|-----------|
| O | 1.878940  | 0.590637  | 0.781638  |
| C | 0.991198  | -0.124044 | -0.118663 |
| C | -0.166194 | -0.573402 | 0.766009  |
| C | 0.152485  | -0.135366 | 2.079718  |
| C | 1.337755  | 0.526879  | 2.007657  |

<sup>a</sup> Department of Physical Chemistry, University of Chemistry and Technology, Technická 5, 16628 Prague, Czech Republic.

<sup>b</sup> Molecular Physics, Fritz-Haber-Institut der Max-Planck-Gesellschaft, Faradayweg 4-6, 14195 Berlin, Germany.

<sup>c</sup> Department of Chemistry, Graduate School of Science, Kyoto University, Kitashirakawa-Oiwakecho, Sakyo-Ku, 606-8502 Kyoto, Japan.

<sup>‡</sup> Current address: Molecular Physics, Fritz-Haber-Institut der Max-Planck-Gesellschaft, Faradayweg 4-6, 14195 Berlin, Germany.

<sup>§</sup> winter@fhi-berlin.mpg.de

<sup>¶</sup> Petr.Slavicek@vscht.cz

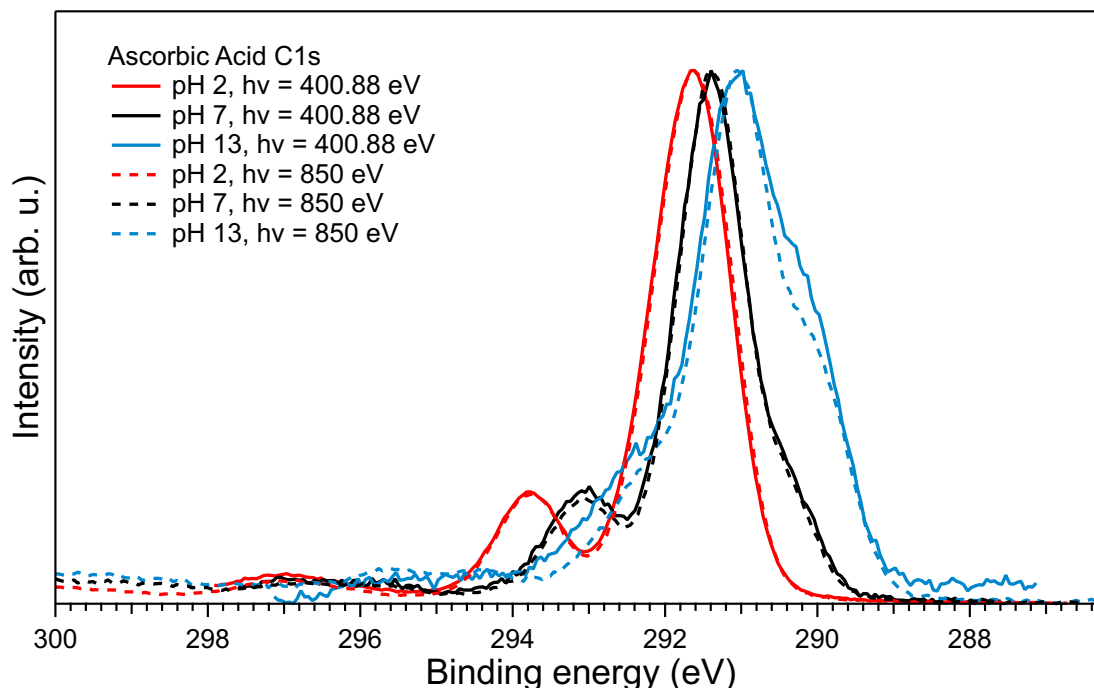

**Fig. S1** Comparison of C 1s liquid-jet photoemission spectra of aqueous solutions of vitamin C (ascorbic acid) measured using two different photon energies, 400.88 eV and 850 eV. Results for solutions pH values of 2, 7, and 13 are shown.

|   |           |           |           |
|---|-----------|-----------|-----------|
| C | 0.570195  | 0.794845  | -1.260077 |
| O | -0.099885 | 1.939160  | -0.762650 |
| O | -1.159107 | -1.194055 | 0.383904  |
| O | -0.592567 | -0.321155 | 3.204582  |
| O | 1.995918  | 1.104385  | 2.990715  |
| C | 1.742088  | 1.147612  | -2.162276 |
| O | 1.230366  | 1.836078  | -3.293547 |
| H | -1.387190 | -0.824963 | 2.958354  |
| H | 1.539774  | -0.993303 | -0.490759 |
| H | 2.461053  | 1.774468  | -1.618181 |
| H | 2.250879  | 0.224559  | -2.466480 |
| H | 1.967822  | 2.085874  | -3.869228 |
| H | -0.173679 | 0.246519  | -1.846717 |
| H | 0.544829  | 2.526232  | -0.336017 |
| H | 2.822057  | 1.507285  | 2.666294  |

### 3.2 Singly deprotonated molecule of vitamin C with six explicit water molecules

Deprotonated at C2-O<sup>-</sup>

|   |           |           |           |
|---|-----------|-----------|-----------|
| O | 1.844723  | -0.286673 | 0.575607  |
| C | 0.650470  | -0.226850 | -0.221966 |
| C | -0.443520 | -0.482616 | 0.767605  |
| C | 0.051710  | -0.642734 | 2.011771  |
| C | 1.514811  | -0.521557 | 1.879217  |
| C | 0.593265  | 1.138796  | -0.919843 |
| O | 0.649051  | 2.194543  | 0.026480  |
| O | -1.757352 | -0.509257 | 0.440683  |
| O | -0.557426 | -0.872713 | 3.165756  |

|   |           |           |           |
|---|-----------|-----------|-----------|
| O | 2.381108  | -0.606555 | 2.728369  |
| C | 1.678086  | 1.264921  | -1.977234 |
| O | 1.450613  | 2.467196  | -2.696815 |
| H | 0.712700  | -1.020642 | -0.975242 |
| H | 2.666898  | 1.276107  | -1.500518 |
| H | 1.627179  | 0.396862  | -2.646150 |
| H | 2.152384  | 2.576963  | -3.354938 |
| H | -0.378969 | 1.239377  | -1.412818 |
| H | 1.527971  | 2.207566  | 0.440169  |
| H | -1.894942 | -0.554158 | -0.518592 |
| H | -1.021795 | 0.618684  | 3.811167  |
| O | -1.369803 | 1.507260  | 4.106930  |
| H | -0.807525 | 1.793067  | 4.842445  |
| H | -1.317423 | 2.610540  | 2.636084  |
| O | -1.319656 | 3.188487  | 1.843665  |
| H | -0.676932 | 2.792730  | 1.224081  |
| H | -3.191315 | 1.150481  | 4.464638  |
| O | -4.076216 | 0.732176  | 4.462953  |
| H | -3.935938 | -0.065010 | 3.906147  |
| H | -2.250738 | -1.255037 | 3.004375  |
| O | -3.221526 | -1.417435 | 2.877293  |
| H | -3.350388 | -1.229220 | 1.934195  |
| H | -0.492588 | -2.806939 | 3.452553  |
| O | -0.171390 | -3.636595 | 3.860302  |
| H | 0.469017  | -3.290684 | 4.510836  |

|   |          |           |          |
|---|----------|-----------|----------|
| H | 0.527703 | -1.164366 | 4.583697 |
| O | 1.201657 | -1.516986 | 5.212734 |
| H | 2.021383 | -1.344843 | 4.719316 |

**Deprotonated at C3-O<sup>-</sup>**

|   |           |           |           |
|---|-----------|-----------|-----------|
| C | 1.330033  | 0.016732  | 1.892220  |
| C | 1.825876  | -0.384786 | 0.685862  |
| C | 0.748788  | -0.831888 | -0.155158 |
| O | -0.436635 | -0.702261 | 0.534031  |
| C | -0.173701 | -0.146958 | 1.834593  |
| O | 3.134941  | -0.409610 | 0.273260  |
| O | 0.751311  | -1.275980 | -1.290767 |
| C | -0.948766 | 1.163658  | 1.983968  |
| O | -0.639180 | 2.051953  | 0.912967  |
| O | 1.944364  | 0.476888  | 2.934476  |
| C | -2.444614 | 0.924009  | 2.090912  |
| O | -3.071984 | 2.163732  | 2.386960  |
| O | 3.742323  | 1.981881  | 1.345920  |
| H | 3.521150  | 0.481208  | 0.487891  |
| H | -0.512065 | -0.868056 | 2.585802  |
| H | -2.827733 | 0.508790  | 1.149587  |
| H | -2.630183 | 0.195826  | 2.890344  |
| H | -4.030134 | 2.029203  | 2.424341  |
| H | -0.603790 | 1.668144  | 2.890358  |
| H | -0.941188 | 1.654903  | 0.078829  |
| H | 3.072914  | 2.613251  | 0.987808  |
| H | 3.312717  | 1.615795  | 2.147338  |
| H | 0.849755  | 3.031677  | 0.646629  |
| O | 1.662515  | 3.540252  | 0.425608  |
| H | 1.570567  | 4.396781  | 0.868638  |
| H | 1.521489  | 2.169516  | 3.672201  |
| O | 1.313237  | 3.020410  | 4.107978  |
| H | 1.176156  | 2.790239  | 5.051936  |
| H | 1.522594  | -0.126800 | 4.531887  |
| O | 1.396545  | -0.389112 | 5.477973  |
| H | 0.660180  | -1.018491 | 5.492435  |
| H | 3.463497  | -0.745743 | 3.095383  |
| O | 4.140513  | -1.388722 | 2.803780  |
| H | 4.057529  | -1.342476 | 1.833035  |
| H | 1.623006  | 2.200789  | 7.344756  |
| O | 0.925625  | 2.000622  | 6.703161  |
| H | 1.096598  | 1.079514  | 6.386603  |

**Deprotonated at C5-O<sup>-</sup>**

|   |           |           |           |
|---|-----------|-----------|-----------|
| O | 1.982086  | 0.978682  | 0.890931  |
| C | 1.405661  | -0.113566 | 0.143700  |
| C | 0.399305  | -0.696189 | 1.092453  |
| C | 0.361978  | 0.037959  | 2.208587  |
| C | 1.355584  | 1.095306  | 2.082788  |
| C | 0.787026  | 0.419471  | -1.169244 |
| O | -0.168665 | 1.391465  | -0.927966 |
| O | -0.398133 | -1.742633 | 0.805471  |
| O | -0.413982 | -0.112845 | 3.305206  |
| O | 1.624570  | 1.958924  | 2.894684  |
| C | 1.927782  | 0.874897  | -2.082562 |
| O | 1.398317  | 1.242100  | -3.363002 |
| H | -0.213517 | 0.607843  | 3.928022  |
| H | 2.214798  | -0.820571 | -0.069286 |

|   |           |           |           |
|---|-----------|-----------|-----------|
| H | 2.447342  | 1.735183  | -1.646280 |
| H | 2.647683  | 0.059237  | -2.204676 |
| H | 2.020532  | 0.969339  | -4.052385 |
| H | 0.337638  | -0.463994 | -1.663343 |
| H | -0.070908 | -2.250892 | 0.044332  |
| H | -1.135797 | 2.191761  | 0.539341  |
| O | -1.944540 | 2.412803  | 1.049735  |
| H | -2.493608 | 1.622711  | 0.877542  |
| H | 0.536415  | 2.883412  | -0.675195 |
| O | 0.883064  | 3.824621  | -0.617463 |
| H | 1.683663  | 3.782573  | -0.074181 |
| H | 1.164896  | 3.074800  | -3.513363 |
| O | 0.876990  | 4.003201  | -3.378781 |
| H | 0.991425  | 4.136305  | -2.409850 |
| H | -1.080519 | 2.167538  | -2.197862 |
| O | -1.591874 | 2.764013  | -2.807930 |
| H | -0.891389 | 3.342162  | -3.178061 |
| H | -2.715152 | 3.663513  | -0.107556 |
| O | -3.024062 | 4.180677  | -0.881766 |
| H | -2.563702 | 3.746031  | -1.636829 |
| H | -1.645921 | 0.502621  | -0.688443 |
| O | -2.498869 | 0.067674  | -0.412095 |
| H | -2.223957 | -0.746249 | 0.039460  |

**Deprotonated at C6-O<sup>-</sup>**

|   |           |           |           |
|---|-----------|-----------|-----------|
| O | 1.841074  | 0.232596  | 0.874856  |
| C | 0.815771  | -0.008675 | -0.106698 |
| C | -0.393680 | -0.385339 | 0.705990  |
| C | -0.077399 | -0.303381 | 2.007029  |
| C | 1.313824  | 0.088286  | 2.114677  |
| C | 0.596217  | 1.219925  | -0.985211 |
| O | 0.327148  | 2.320887  | -0.137035 |
| O | -1.567036 | -0.703819 | 0.170339  |
| O | -0.861265 | -0.534011 | 3.092671  |
| O | 1.963190  | 0.260100  | 3.131067  |
| C | 1.746704  | 1.468046  | -1.967853 |
| O | 1.336222  | 2.256150  | -3.060682 |
| H | -0.323042 | -0.398775 | 3.891838  |
| H | 1.147695  | -0.846261 | -0.728016 |
| H | 2.576104  | 1.943547  | -1.421257 |
| H | 2.110214  | 0.489709  | -2.324615 |
| H | -0.293827 | 0.996268  | -1.587868 |
| H | 0.058626  | 3.082565  | -0.699222 |
| H | -1.522782 | -0.801714 | -0.824186 |
| H | 0.001399  | 1.439246  | -3.738816 |
| O | -0.660315 | 0.840267  | -4.193852 |
| H | -0.157516 | 0.518364  | -4.962938 |
| H | 0.418093  | 3.517531  | -2.583766 |
| O | -0.116023 | 4.215188  | -2.087339 |
| H | -0.998746 | 4.223764  | -2.485779 |
| H | 2.498959  | 3.299937  | -3.507289 |
| O | 3.240725  | 3.894387  | -3.850195 |
| H | 2.955451  | 4.807250  | -3.699259 |
| H | 3.219811  | 3.598745  | -7.048803 |

|   |           |           |           |
|---|-----------|-----------|-----------|
| O | 3.619208  | 3.006956  | -6.394592 |
| H | 3.514771  | 3.454687  | -5.516209 |
| H | 1.848106  | 1.423430  | -4.548479 |
| O | 1.980645  | 0.934037  | -5.398118 |
| H | 2.535917  | 1.538311  | -5.934331 |
| H | -1.199246 | -0.404688 | -3.140745 |
| O | -1.461500 | -1.094616 | -2.470973 |
| H | -2.269884 | -1.513119 | -2.803224 |

### 3.3 Doubly deprotonated molecule of vitamin C with 12 explicit water molecules

#### Deprotonated at C2-O<sup>-</sup> and C3-O<sup>-</sup>

|   |           |           |           |
|---|-----------|-----------|-----------|
| O | 0.041558  | -0.353340 | 1.953593  |
| C | 1.066057  | 0.648626  | 1.825276  |
| C | 1.343638  | 0.735095  | 0.343174  |
| C | 0.538606  | -0.159436 | -0.305178 |
| C | -0.256181 | -0.838143 | 0.702603  |
| C | 0.569242  | 1.943351  | 2.471599  |
| O | -0.643035 | 2.381104  | 1.877712  |
| O | 2.267640  | 1.543654  | -0.114416 |
| O | 0.416585  | -0.447573 | -1.608254 |
| O | -1.088974 | -1.725119 | 0.577269  |
| C | 0.440041  | 1.792513  | 3.979256  |
| O | 0.171679  | 3.074597  | 4.535266  |
| O | 2.456388  | -4.009308 | -0.151691 |
| O | 2.289889  | -0.914382 | -3.527011 |
| O | 4.951939  | -0.252658 | -3.006235 |
| O | 0.930258  | -3.034986 | -2.181145 |
| O | -2.189494 | -0.437165 | -2.574731 |
| O | 2.057777  | 3.057802  | -2.298016 |
| O | 3.694566  | 3.278360  | 1.362109  |
| O | -0.348455 | 1.776433  | -2.988343 |
| O | 6.086072  | 2.024111  | 1.089442  |
| O | 4.182651  | -2.205707 | 1.134163  |
| O | 4.611474  | 0.167693  | -0.325311 |
| H | 1.953666  | 0.291133  | 2.360405  |
| H | -0.369381 | 1.090923  | 4.218436  |
| H | 1.377942  | 1.389926  | 4.382761  |
| H | 0.047968  | 2.981637  | 5.490977  |
| H | 1.302308  | 2.727738  | 2.264594  |
| H | -1.298589 | 1.670402  | 1.968983  |
| H | 4.642596  | 0.570126  | -3.442988 |
| H | 4.936046  | -0.065585 | -2.036935 |
| H | 2.128910  | 2.494716  | -1.473319 |
| H | 2.262686  | 3.967856  | -2.037670 |
| H | 3.105894  | 2.668593  | 0.835987  |
| H | 3.626673  | 4.150774  | 0.946681  |
| H | 6.422723  | 1.729563  | 1.948563  |
| H | 5.282470  | 2.572683  | 1.277590  |
| H | 4.318947  | -1.400897 | 0.589864  |
| H | 3.577642  | -2.790735 | 0.629467  |

|   |           |           |           |
|---|-----------|-----------|-----------|
| H | 3.746996  | 0.654433  | -0.293554 |
| H | 5.245368  | 0.741502  | 0.167581  |
| H | 1.731503  | -0.621248 | -2.760213 |
| H | 3.225606  | -0.902050 | -3.223223 |
| H | 1.904244  | -3.677788 | -0.908156 |
| H | 2.914170  | -4.797380 | -0.478836 |
| H | 0.585684  | -2.160690 | -1.850893 |
| H | 1.531581  | -2.738945 | -2.891189 |
| H | -1.320664 | -0.598141 | -2.133211 |
| H | -2.070426 | 0.447293  | -2.959012 |
| H | 0.004766  | 0.999462  | -2.483428 |
| H | 0.346742  | 2.454656  | -2.883671 |
| H | 2.737033  | 0.812045  | -4.270153 |
| O | 3.303894  | 1.610907  | -4.326936 |
| H | 2.929896  | 2.222154  | -3.653667 |

#### Deprotonated at C2-O<sup>-</sup> and C5-O<sup>-</sup>

|   |           |           |           |
|---|-----------|-----------|-----------|
| C | 1.892663  | 0.317759  | 0.960959  |
| O | 1.079259  | -0.192794 | 0.009766  |
| C | -0.159899 | -0.634723 | 0.610590  |
| C | 0.000602  | -0.267906 | 2.057085  |
| C | 1.217508  | 0.276772  | 2.267349  |
| C | -1.365735 | -0.048673 | -0.143482 |
| C | -1.241389 | -0.451076 | -1.616071 |
| O | -2.517149 | -0.313098 | -2.256648 |
| O | -0.885877 | -0.606321 | 3.014373  |
| O | 1.793491  | 0.711399  | 3.385841  |
| O | 3.012338  | 0.722173  | 0.689563  |
| O | -1.550274 | 1.319215  | 0.037468  |
| O | 1.555039  | 4.442794  | 1.385381  |
| O | 2.461585  | 4.292349  | 5.015646  |
| O | 0.253442  | 2.619917  | 4.392008  |
| O | 1.558009  | -1.180306 | 5.515172  |
| O | 4.029275  | -0.657126 | 4.198463  |
| O | 3.321897  | 2.814288  | 2.726019  |
| H | -0.185807 | -1.726375 | 0.504172  |
| H | -0.503900 | 0.191426  | -2.109939 |
| H | -0.912015 | -1.494008 | -1.695669 |
| H | -2.463556 | -0.716317 | -3.135568 |
| H | -2.231503 | -0.614568 | 0.252880  |
| H | -1.813267 | -0.259502 | 2.867751  |
| H | 2.771042  | 2.026096  | 2.999959  |
| H | 3.847965  | 2.458547  | 1.990380  |
| H | 2.210070  | 3.889851  | 1.877985  |
| H | 2.044336  | 5.212671  | 1.059856  |
| H | 3.030421  | 3.957978  | 4.298381  |
| H | 1.623373  | 3.799590  | 4.887043  |
| H | 0.794160  | 1.830046  | 4.093892  |
| H | -0.256983 | 2.323411  | 5.160964  |
| H | 1.347866  | -0.519007 | 4.822998  |
| H | 2.510327  | -1.324258 | 5.361017  |
| H | 3.310246  | -0.129192 | 3.769707  |
| H | 4.407255  | -1.212752 | 3.501270  |

|   |           |          |           |
|---|-----------|----------|-----------|
| H | -2.198477 | 2.265982 | -1.387154 |
| O | -2.671994 | 2.510433 | -2.217999 |
| H | -2.878986 | 1.618621 | -2.553186 |
| H | -3.235739 | 1.305935 | 0.275128  |
| O | -4.187790 | 1.126350 | 0.535663  |
| H | -4.640140 | 1.981646 | 0.502698  |
| H | -3.780152 | 0.606285 | 2.206447  |
| O | -3.264290 | 0.580132 | 3.046407  |
| H | -2.807470 | 1.458278 | 3.020869  |
| H | -1.516450 | 2.205984 | 1.568618  |
| O | -1.742913 | 2.731695 | 2.381903  |
| H | -0.965891 | 2.721220 | 2.980475  |
| H | -0.259565 | 2.381381 | -0.419027 |
| O | 0.369026  | 3.086059 | -0.735012 |
| H | 0.777022  | 3.507880 | 0.053130  |
| H | 1.478717  | 2.615895 | -1.963907 |
| O | 2.113078  | 2.368348 | -2.685129 |
| H | 1.850036  | 2.894248 | -3.453604 |

**Deprotonated at C2-O<sup>-</sup> and C6-O<sup>-</sup>**

|   |           |           |           |
|---|-----------|-----------|-----------|
| C | 1.744470  | 0.670955  | 0.760540  |
| O | 0.989772  | 0.050420  | -0.188838 |
| C | -0.305677 | -0.248282 | 0.354819  |
| C | -0.211961 | 0.212331  | 1.776427  |
| C | 0.991186  | 0.775386  | 2.020441  |
| C | -1.412284 | 0.430862  | -0.448787 |
| C | -1.623412 | -0.199260 | -1.830186 |
| O | -2.912274 | 0.064699  | -2.336636 |
| O | -1.243063 | 0.100788  | 2.640130  |
| O | 1.491998  | 1.332024  | 3.115889  |
| O | 2.879407  | 1.036611  | 0.512083  |
| O | -1.139212 | 1.820371  | -0.502115 |
| O | -4.576157 | -1.586278 | -5.700791 |
| O | -4.095844 | -2.333752 | -3.019269 |
| O | -3.205494 | -1.526443 | 1.764091  |
| O | -3.399485 | 2.605091  | -1.888065 |
| O | -2.906776 | 0.420988  | -4.941362 |
| O | -4.592285 | -0.987966 | -0.508478 |
| H | -0.444108 | -1.333526 | 0.293215  |
| H | -0.843626 | 0.180128  | -2.509053 |
| H | -1.472851 | -1.288018 | -1.738116 |
| H | -2.335411 | 0.263274  | 0.122028  |
| H | -1.914552 | 2.268329  | -0.907818 |
| H | -1.975404 | -0.473905 | 2.286266  |
| H | -3.999675 | -0.489084 | -1.143711 |
| H | -4.837415 | -1.773534 | -1.029435 |
| H | -3.334595 | 1.623082  | -2.112603 |
| H | -4.203049 | 2.715573  | -1.358877 |
| H | -2.886594 | 0.333061  | -3.933892 |
| H | -3.140198 | 1.340724  | -5.133937 |
| H | -5.466157 | -1.261295 | -5.900792 |
| H | -4.020383 | -0.783072 | -5.529420 |
| H | -3.607848 | -1.488610 | -2.853801 |
| H | -4.393919 | -2.254968 | -3.949822 |

|   |           |           |          |
|---|-----------|-----------|----------|
| H | -3.752140 | -1.352265 | 0.949975 |
| H | -3.827628 | -1.748781 | 2.472861 |
| H | 1.162237  | 0.728509  | 4.730975 |
| O | 0.964408  | 0.698690  | 5.703125 |
| H | 0.151396  | 1.232051  | 5.757875 |
| H | 3.015119  | 2.964331  | 5.327600 |
| O | 3.219540  | 2.298717  | 6.024924 |
| H | 2.391625  | 1.771383  | 6.106470 |
| H | 3.233909  | 0.886295  | 3.418461 |
| O | 4.134119  | 0.811511  | 3.823084 |
| H | 3.994819  | 1.191905  | 4.719957 |
| H | 4.983385  | 2.160603  | 3.075883 |
| O | 5.226137  | 3.048130  | 2.704670 |
| H | 5.997223  | 3.351621  | 3.205903 |
| H | 2.215607  | 2.951604  | 3.315609 |
| O | 2.675449  | 3.749791  | 3.674594 |
| H | 3.574945  | 3.712370  | 3.282603 |
| H | 0.025875  | 2.285274  | 3.793321 |
| O | -0.845837 | 2.455960  | 4.216753 |
| H | -1.398449 | 1.759906  | 3.818214 |

**Deprotonated at C3-O<sup>-</sup> and C5-O<sup>-</sup>**

|   |           |           |           |
|---|-----------|-----------|-----------|
| C | 1.756268  | 0.380589  | 2.296165  |
| C | 2.248465  | 0.158201  | 0.883385  |
| C | 1.412511  | -0.747417 | 0.301999  |
| C | 0.411201  | -1.151243 | 1.255080  |
| O | 0.599002  | -0.468390 | 2.422123  |
| O | 3.315575  | 0.742330  | 0.427789  |
| O | 1.460398  | -1.361280 | -0.922829 |
| O | -0.487188 | -1.973844 | 1.149450  |
| C | 1.418535  | 1.830164  | 2.670675  |
| C | 1.042236  | 1.890647  | 4.150064  |
| O | 1.145911  | 3.249187  | 4.605421  |
| O | 0.446943  | 2.402829  | 1.853320  |
| O | 2.950717  | 2.266119  | -1.733381 |
| O | 3.986307  | 4.979670  | 1.730154  |
| O | 5.127509  | 2.408114  | 1.739997  |
| O | 3.506320  | -3.340540 | -0.644593 |
| O | 4.951981  | -0.917756 | -0.925224 |
| O | 3.034617  | -0.255519 | -2.831732 |
| H | 1.985798  | -0.843241 | -1.589347 |
| H | 2.512419  | 0.000994  | 2.994217  |
| H | 0.017289  | 1.528739  | 4.288211  |
| H | 1.724029  | 1.269580  | 4.742466  |
| H | 1.013782  | 3.260184  | 5.565087  |
| H | 2.379564  | 2.368241  | 2.575965  |
| H | 3.012180  | 0.717406  | -2.697097 |
| H | 3.882372  | -0.533090 | -2.423280 |
| H | 3.162606  | 1.783060  | -0.886381 |
| H | 3.609620  | 2.969234  | -1.835923 |
| H | 4.370777  | 5.562669  | 1.059258  |
| H | 3.013676  | 4.950854  | 1.543078  |
| H | 4.458546  | 1.813608  | 1.335080  |
| H | 4.728464  | 3.304646  | 1.724188  |

|   |           |           |           |
|---|-----------|-----------|-----------|
| H | 2.664934  | -2.851610 | -0.740660 |
| H | 4.175950  | -2.628952 | -0.697220 |
| H | 4.444927  | -0.286291 | -0.344887 |
| H | 5.894287  | -0.726060 | -0.808002 |
| H | -0.930122 | 3.219438  | 2.579441  |
| O | -1.783991 | 3.658683  | 2.830252  |
| H | -1.491105 | 4.531704  | 3.157650  |
| H | 0.451203  | 4.886339  | 4.040729  |
| O | 0.045748  | 5.676664  | 3.625690  |
| H | 0.442657  | 5.674476  | 2.729036  |
| H | 0.977871  | 3.890989  | 1.563081  |
| O | 1.293656  | 4.820721  | 1.299166  |
| H | 1.066950  | 4.855387  | 0.353511  |
| H | 0.490623  | 2.625024  | 0.096111  |
| O | 0.420233  | 3.004377  | -0.818880 |
| H | 1.273104  | 2.793736  | -1.255313 |
| H | -1.085848 | 2.159231  | -1.435026 |
| O | -1.936670 | 1.669757  | -1.480814 |
| H | -2.106988 | 1.461918  | -0.535525 |
| H | -1.077818 | 1.480525  | 1.496541  |
| O | -2.031492 | 1.295504  | 1.295336  |
| H | -2.481440 | 2.060572  | 1.694766  |

**Deprotonated at C3-O<sup>-</sup> and C6-O<sup>-</sup>**

|   |           |           |           |
|---|-----------|-----------|-----------|
| C | 0.441723  | 0.520084  | 1.215997  |
| C | 1.397631  | 0.347345  | 0.057986  |
| C | 0.649508  | 0.252864  | -1.076702 |
| C | -0.743994 | 0.383847  | -0.734310 |
| O | -0.866838 | 0.554455  | 0.621827  |
| O | 2.687867  | 0.299819  | 0.246573  |
| O | 1.009899  | 0.080308  | -2.380750 |
| O | -1.735732 | 0.366343  | -1.446336 |
| C | 0.683074  | 1.789299  | 2.027759  |
| C | -0.049847 | 1.819847  | 3.371899  |
| O | 0.524933  | 2.756172  | 4.240345  |
| O | 0.420864  | 2.950747  | 1.244382  |
| O | 4.980921  | 1.808014  | -2.969366 |
| O | 3.912376  | 2.703361  | -0.662793 |
| O | 4.323171  | 0.918710  | 2.532813  |
| O | 3.277863  | -2.301885 | 1.134948  |
| O | 5.687102  | 2.961811  | 1.431261  |
| O | 3.648237  | -0.498819 | -2.225700 |
| H | 1.975940  | -0.141822 | -2.435254 |
| H | 0.488855  | -0.352153 | 1.877244  |
| H | -1.116937 | 2.036644  | 3.190544  |
| H | -0.002413 | 0.807163  | 3.807416  |
| H | 1.755102  | 1.826515  | 2.235929  |
| H | -0.514858 | 2.934144  | 0.985814  |
| H | 4.166731  | 0.247706  | -2.608909 |
| H | 3.545407  | -0.278281 | -1.271056 |
| H | 4.608500  | 2.275967  | -3.731234 |
| H | 4.624487  | 2.261458  | -2.159515 |
| H | 3.432490  | 1.909621  | -0.336923 |
| H | 4.595832  | 2.888289  | 0.024709  |

|   |           |           |          |
|---|-----------|-----------|----------|
| H | 3.658589  | 0.692304  | 1.846729 |
| H | 3.839270  | 1.232105  | 3.337784 |
| H | 3.083004  | -1.390865 | 0.822369 |
| H | 3.066002  | -2.880817 | 0.388402 |
| H | 6.595889  | 2.695681  | 1.227991 |
| H | 5.271753  | 2.197607  | 1.914332 |
| H | 1.431196  | 3.940482  | 3.446788 |
| O | 1.961261  | 4.678990  | 3.027604 |
| H | 1.607884  | 4.716579  | 2.125054 |
| H | -0.396797 | 4.007938  | 4.811231 |
| O | -0.769326 | 4.760903  | 5.365405 |
| H | -1.421902 | 5.221802  | 4.818550 |
| H | 0.421261  | 2.469125  | 5.906706 |
| O | 0.434591  | 2.488238  | 6.907128 |
| H | -0.219647 | 3.169067  | 7.130829 |
| H | 2.637678  | 4.576873  | 6.350648 |
| O | 2.933413  | 3.753469  | 6.804788 |
| H | 2.088045  | 3.298559  | 7.023538 |
| H | 2.076587  | 2.113529  | 4.554628 |
| O | 2.990845  | 1.779765  | 4.776274 |
| H | 3.297093  | 2.434015  | 5.440609 |
| H | 0.829210  | 5.674122  | 5.562804 |
| O | 1.771180  | 5.941195  | 5.461886 |
| H | 1.954238  | 5.717480  | 4.522175 |

**Deprotonated at C5-O<sup>-</sup> and C6-O<sup>-</sup>**

|   |           |           |           |
|---|-----------|-----------|-----------|
| C | 2.251020  | -0.322709 | 0.109142  |
| O | 1.306723  | -0.699275 | -0.780486 |
| C | 0.095485  | -1.054721 | -0.076507 |
| C | 0.458903  | -0.901894 | 1.372098  |
| C | 1.722383  | -0.458118 | 1.451151  |
| C | -1.079354 | -0.145044 | -0.472036 |
| C | -1.449654 | -0.334361 | -1.952173 |
| O | -2.778608 | 0.057013  | -2.230161 |
| O | -0.371632 | -1.117728 | 2.387776  |
| O | 2.402738  | -0.042438 | 2.556921  |
| O | 3.360044  | 0.062202  | -0.220140 |
| O | -0.883181 | 1.174309  | -0.092053 |
| O | -4.628065 | -1.118464 | -3.799848 |
| O | -4.150643 | -1.562344 | -0.443584 |
| O | -3.064908 | -1.234565 | 2.015916  |
| O | -2.770618 | 2.772185  | -2.740671 |
| O | -2.584030 | 0.930111  | -4.831723 |
| O | -5.518697 | 0.707894  | -1.845977 |
| H | 3.324317  | 0.139338  | 2.301900  |
| H | -0.127384 | -2.096322 | -0.329422 |
| H | -0.736280 | 0.240488  | -2.563529 |
| H | -1.312671 | -1.397851 | -2.215162 |
| H | -1.921835 | -0.579941 | 0.087561  |
| H | -1.320381 | -1.248739 | 2.123012  |
| H | -4.546467 | 0.747988  | -1.735540 |
| H | -5.605135 | 0.122267  | -2.626566 |
| H | -2.750821 | 1.856427  | -2.346930 |
| H | -2.753571 | 2.567401  | -3.696771 |
| H | -2.637655 | 0.505528  | -3.934987 |

```

H -3.342188 0.566710 -5.314189
H -3.840574 -0.899222 -3.230987
H -4.817724 -2.058137 -3.663305
H -3.620455 -0.996002 -1.071393
H -5.040906 -1.174681 -0.486321
H -3.523558 -1.459945 1.160702
H -3.529663 -1.702908 2.726565
H 0.040584 1.836662 1.134254
O 0.504303 2.415174 1.817858
H 1.179103 1.861441 2.243255
H 0.599325 4.193809 -0.635332
O 1.026032 4.628973 0.140233
H 0.953523 3.945288 0.838050
H -0.361329 2.277264 -1.184108
O -0.136013 3.044643 -1.797223
H -0.994509 3.212007 -2.236606
H -4.509102 3.411592 -2.480372
O -5.477707 3.490315 -2.343649
H -5.740555 2.560504 -2.183699
H -2.244131 1.528937 0.793324
O -3.043358 1.626033 1.399757
H -3.181828 0.731905 1.764533
H -0.869673 2.986237 2.932726
O -1.755029 3.160292 3.316191
H -2.343135 2.650477 2.711664

```

#### 4 Sample input for calculating core-level ionization energies using the maximum overlap method within the Q-Chem 6.0 software

\$molecule

```

0 1
C 1.825823 0.674620 0.709209
C 0.912154 -0.096275 -0.194739
C -0.136831 -0.526982 0.504213
C 0.016518 -0.081475 1.875330
O 1.168415 0.623924 1.985358
O 1.134066 -0.303772 -1.493924
O -1.191973 -1.256956 0.089733
O -0.721961 -0.279053 2.806705
C 2.048409 2.132593 0.306830
C 3.010325 2.815911 1.258550
O 3.344138 4.080424 0.714940
O 0.825702 2.823450 0.179275
H -1.773955 -1.411373 0.845365
H 2.789155 0.171351 0.809316
H 2.541475 2.923753 2.240192
H 3.902363 2.194827 1.372274
H 3.894457 4.554854 1.343548
H 2.499691 2.140598 -0.686906
H 0.445142 2.959890 1.053561
H 1.988809 0.038980 -1.777962

```

\$end

\$rem

```

METHOD CAM-B3LYP
BASIS General
MAX_SCF_CYCLES 129
solvent_method pcm
PCM_PRINT 1
MEM_TOTAL 16000
$end

```

\$basis

```

H 0
aug-cc-pVTZ
****
C 0
aug-cc-pCVTZ
****
O 0
aug-cc-pCVTZ
****
$end

$pcm
THEORY IEFPCM
RADII UFF
vdwScale 1.1
NonEquilibrium
$end

$solvent
Dielectric 78.39
OpticalDielectric 1.78
$end

```

@@@

```

$molecule
1 2
READ
$end
$rem
METHOD CAM-B3LYP
BASIS General
MAX_SCF_CYCLES 129
unrestricted TRUE
mom_start 1
MOM_METHOD IMOM
scf_guess read
solvent_method pcm
PCM_PRINT 1
MEM_TOTAL 16000
$end

```

\$basis

```

H 0
aug-cc-pVTZ
****
C 0
aug-cc-pCVTZ
****
O 0
aug-cc-pCVTZ
****
$end

```

\$pcm

```

THEORY IEFPCM
RADII UFF
vdwScale 1.1
StateSpecific Marcus
$end

```

\$solvent

Dielectric 78.39  
OpticalDielectric 1.78  
\$end

\$occupied  
1:46  
1:6 8:46  
\$end

## 5 Cartesian coordinates of structures sampled from QM/MM dynamics

### 5.1 Fully protonated molecule of vitamin C

|   |                          |                      |                          |   |                         |                         |                          |
|---|--------------------------|----------------------|--------------------------|---|-------------------------|-------------------------|--------------------------|
| C | 0.73270565764705897      | 0.14730178470588234  | -0.23382298323529410     | C | 0.78058292982352961     | 7.9318864117647048E-002 | -0.12746648405882346     |
| C | 1.0468530576470589       | 0.98908504470588232  | 0.95052217076470602      | C | 1.1014151298235295      | 0.98591657411764699     | 1.0242491959411764       |
| C | 0.11860095764705880      | 1.9784511847058823   | 0.97168117076470595      | C | 0.18424712982352931     | 1.9863336641176470      | 0.97304057594117654      |
| O | -0.76535520235294119     | 1.8918391847058824   | -0.26580528823529409     | C | -0.81909626017647064    | 1.7089933641176469      | -5.4085365058823484E-002 |
| O | -0.40052861235294124     | 0.73515877470588231  | -0.86518568923529404     | O | -0.38759958017647056    | 0.63062646411764711     | -0.76649163405882337     |
| O | 2.0949684576470586       | 0.68465971470588238  | 1.6853662707647059       | O | 2.1433962298235296      | 0.68060480411764712     | 1.7600544959411766       |
| O | 7.0955757647058748E-002  | 3.0341725847058827   | 1.8400036707647058       | O | 6.9831298235294437E-003 | 2.9713161641176473      | 1.8952759959411765       |
| O | -1.6416791423529413      | 2.6716788847058819   | -0.64230069923529409     | O | -1.8144461801764706     | 2.3684504641176471      | -0.31381451405882349     |
| C | 0.47019885764705882      | -1.3606667152941176  | 0.18533310076470591      | C | 0.45971342982352947     | -1.4304546358823531     | 0.16192980594117654      |
| C | -0.15429394235294125     | -2.0871713152941176  | -0.97744688923529410     | C | -0.18721177017647062    | -2.0098970358823527     | -1.1663659040588235      |
| O | -0.31836965235294123     | -3.4563091152941174  | -0.55725131923529414     | O | -0.24261867017647063    | -3.4615343358823529     | -1.0102506040588235      |
| O | -0.36598474235294121     | -1.4632259152941176  | 1.2975286707647060       | O | -0.59206045017647064    | -1.4074428358823530     | 1.1886532959411764       |
| H | -0.73559925235294121     | 3.5429686847058823   | 1.6522233707647058       | H | -0.32655213017647056    | 3.7902654641176472      | 1.4762790959411765       |
| H | 1.6140822576470588       | 0.17004256470588230  | -0.89665054923529408     | H | 1.6183806298235295      | 0.22159942411764705     | -0.75258908405882341     |
| H | -1.1266506423529412      | -1.6117165152941177  | -1.1727356292352942      | H | -1.2349894071764707     | -1.5943265358823531     | -1.2561124040588236      |
| H | 0.45286405764705884      | -2.0683396152941178  | -1.9277706292352941      | H | 0.45304192982352931     | -1.7287704358823530     | -2.1161791040588236      |
| H | -1.0927678723529413      | -3.7979292152941175  | -1.0436887492352942      | H | -1.1431806901764705     | -3.790994358823531      | -0.91612736405882345     |
| H | 1.4429387576470589       | -1.8156213152941179  | 0.33872569076470593      | H | 1.3589571298235295      | -1.9805592835823528     | 0.43573231594117651      |
| H | 8.0803576470587224E-003  | -0.99088341529411772 | 2.0688538707647059       | H | -0.38125618017647056    | -0.7978140358823531     | 1.9114545959411764       |
| H | 2.1974245576470590       | 1.2921216647058822   | 2.4071749707647059       | H | 2.0885329298235296      | 1.1333170041176470      | 2.5837204959411766       |
| C | 0.88214317505882356      | 0.17377727352941175  | -0.24647416970588237     | C | 0.91452563929411745     | 0.13421282411764701     | -0.23194648911764706     |
| C | 1.1184879750588235       | 1.0434523235294118   | 0.96098437029411776      | C | 1.0943051392941174      | 0.97849211411764703     | 1.0318326408823530       |
| C | 0.10618187505882348      | 1.9701581835294117   | 1.0605659202941175       | C | 0.11274803929411759     | 1.8937703241176469      | 1.1154383408823529       |
| O | -0.72027704494117650     | 1.8596687835294117   | -0.21141610970588237     | C | -0.70181134070588258    | 1.7580566241176472      | -0.14074598411764708     |
| O | -0.17044442494117651     | 0.87366748352941181  | -0.94732792970588231     | O | -0.19742125070588257    | 0.79968446411764704     | -0.90028348911764700     |
| O | 2.1186865750588235       | 0.75699184352941173  | 1.7918284702941176       | O | 2.1070901392941175      | 0.57885844411764709     | 1.7941363408823530       |
| O | -8.2585524941176436E-002 | 2.8365564835294119   | 2.0792905702941176       | O | -0.14216986070588256    | 2.8474078241176470      | 2.0348067408823529       |
| O | -1.5769318049411765      | 2.66494343835294115  | -0.53464464970588232     | O | -0.642518544241176472   | 2.4118544241176472      | -0.46665427911764712     |
| C | 0.43990497505882353      | -1.3274668164705883  | 5.0243985294117645E-002  | C | 0.47031513929411739     | -1.2793233758823530     | 9.4322790882352930E-002  |
| C | -0.25747702494117641     | -2.0753571164705882  | -1.0792375297058825      | O | -0.14650056070588247    | -1.9444826758823530     | -1.0829481091176472      |
| O | -0.29518242494117641     | -3.4905279164705885  | -0.64455669970588236     | O | -0.49307275070588252    | -3.3140110758823531     | -0.73391251911764710     |
| O | -0.53210322494117646     | -1.3269045164705882  | 1.0465377702941177       | O | -0.36507447070588250    | -1.3711957758823528     | 1.1859975408823529       |
| H | -0.74509815494117648     | 3.5140715835294118   | 1.8918322702941175       | H | -0.93721782070588255    | 3.3063837241176470      | 1.7864937408823529       |
| H | 1.7739962750588236       | 0.18163897352941175  | -0.80709572970588228     | H | 1.7730402392941174      | 0.10659406411764705     | -0.90401308911764700     |
| H | -1.3226350909411764      | -1.7024893164705881  | -1.1800871297058824      | H | -1.0551030307058826     | -1.4148616758823529     | -1.1926953591176470      |
| H | 0.26923987505882363      | -2.1870128164705882  | -2.0254354297058823      | H | 0.40444733929411747     | -1.8678071758823531     | -2.0605802591176472      |
| H | -1.0059060049411765      | -3.7651588164705885  | -1.2050080297058825      | H | -1.1955067887058826     | -3.623630758823532      | -1.3292485591176471      |
| H | 1.3501432750588234       | -1.9368672164705882  | 0.38222292029411764      | H | 1.4695645392941175      | -1.6572302758823532     | 0.32446519088235293      |
| H | -0.32403540494117644     | -0.89688281647058821 | 1.8883619702941175       | H | 0.21226443929411754     | -1.2640538758823530     | 1.9928623408823529       |
| H | 2.1127837750588234       | 1.2529332235294117   | 2.6405587702941173       | H | 2.1939250392941174      | 1.2697278541176469      | 2.4565160408823528       |
| C | 0.76646123147058831      | 0.10113704547058833  | -0.20554990552941174     | C | 0.83111574176470571     | 0.18601829941176468     | -0.30568109658823522     |
| C | 1.0400114314705882       | 0.90740785547058833  | 0.98548331447058823      | C | 1.0663871417647055      | 0.93649095941176463     | 0.96685410341176481      |
| C | 0.19764123147058821      | 1.9667360954705884   | 1.0660307444705883       | C | 0.10207044176470581     | 1.8919457294117645      | 1.0383377034117649       |
| C | -0.67508914852941182     | 1.8822859954705882   | -1.1810687529411758E-002 | C | -0.71461843823529425    | 1.8168006294117647      | -0.14025113558823527     |
| O | -0.36108366852941187     | 0.81206989547058828  | -0.76558762552941173     | O | -0.20883673823529425    | 0.87363296941176460     | -0.96785841658823524     |
| O | 2.0207937314705884       | 0.53954480247058834  | 1.8542652444705883       | O | 2.0498012417647056      | 0.59796165941176471     | 1.7971773034117648       |
| O | 0.19524303147058819      | 2.9659288954705882   | 1.9537704444705883       | O | -0.11728125823529423    | 2.7888887294117648      | 2.0622768034117644       |
| O | -1.6138788985294119      | 2.6265205954705881   | -0.36017079552941178     | O | -1.6440892682352943     | 2.5839164294117647      | -0.33892077658823527     |
| C | 0.45512123147058814      | -1.3789583045294118  | 6.09977990470588245E-002 | C | 0.53498944176470564     | -1.2628241705882353     | 3.7841264411764747E-002  |
| C | -0.21774226852941192     | -2.0479463045294120  | -1.1352882555294117      | C | -0.22897202823529428    | -1.9787948705882350     | -1.0511732365882354      |
| O | -0.33042276852941188     | -3.4559775045294119  | -0.89313790552941175     | O | -0.43805620823529434    | -3.3396718705882353     | -0.63816815658823522     |
| O | -0.44002125852941187     | -1.5269543045294118  | 1.1541230444705883       | O | -0.39654688823529427    | -1.3704191705882351     | 1.1807239034117647       |
| H | -0.45823720852941185     | 3.6343889954705881   | 1.6761839444705884       | H | -0.78912718823529426    | 3.4200359294117648      | 1.7731798034117647       |
| H | 1.5564085314705880       | 0.17138795547058833  | -1.0133391555294116      | H | 1.770511417647057       | 0.28429005941176466     | -0.94121387658823519     |
|   |                          |                      |                          | H | -1.2539107582352942     | -1.5443413705882354     | -1.1489340965882353      |
|   |                          |                      |                          | H | 0.22711404176470573     | -1.9849163705882353     | -2.0251347965882354      |
|   |                          |                      |                          | H | -0.79055041823529426    | -3.8990135705882354     | -1.2990552965882352      |
|   |                          |                      |                          | H | 1.4963611417647056      | -1.6715388705882352     | 0.22747994341176475      |
|   |                          |                      |                          | H | 0.16281734176470564     | -1.2622420705882353     | 1.9215442034117647       |
|   |                          |                      |                          | H | 2.0626891417647055      | 1.0234258694117648      | 2.6265963034117648       |
|   |                          |                      |                          | C | 0.79991060120000013     | 6.0371284882352994E-002 | -0.17145288090588237     |
|   |                          |                      |                          | C | 1.0882917012000002      | 0.85814900488235302     | 1.0925959259941176       |
|   |                          |                      |                          | C | 0.21858070120000006     | 1.9082146648823530      | 1.080353259941176        |
|   |                          |                      |                          | C | -0.56083588800000002    | 1.9251878648823531      | -0.13655068900588235     |
|   |                          |                      |                          | O | -0.18510579880000000    | 0.86075725488235300     | -0.93555264400588245     |
|   |                          |                      |                          | O | 1.9955342011999999      | 0.42257278188235303     | 1.9851942259941175       |













































































|   |                          |                     |                         |   |                         |                     |                         |
|---|--------------------------|---------------------|-------------------------|---|-------------------------|---------------------|-------------------------|
| H | 4.0124276999999999       | -3.2305660999999999 | -0.8753476399999998     | H | -2.0229121000000001     | -2.6045080999999999 | 1.2851475000000001      |
| O | 4.6524824999999996       | -3.7129458999999998 | 2.7123974000000000      | O | 4.0134793999999996      | -7.1225464000000001 | 1.2749097000000000      |
| H | 4.8573091000000002       | -4.6155201999999997 | 2.7570918000000000      | H | 3.7142176999999998      | -7.7603019000000000 | 0.5730518199999999      |
| H | 3.6635468000000002       | -3.7499994000000001 | 2.6817665000000002      | H | 3.1389296999999998      | -6.9328650000000004 | 1.6598280000000001      |
| O | -1.4402641000000000      | -5.0627081000000000 | 2.7807315999999999E-002 | O | 5.1194265000000003      | -2.2073151000000002 | 0.6095917300000000      |
| H | -0.65658612000000005     | -4.5168859999999997 | 0.14684738000000000     | H | 4.9589235000000000      | -2.8359939999999999 | 1.2944019000000000      |
| H | -1.3177926000000000      | -5.7311481000000004 | 0.72696983000000004     | H | 5.4833537000000003      | -1.4301119000000000 | 1.0696840999999999      |
| O | 3.9501331999999998       | -6.8554487999999996 | 1.0599052000000000      |   |                         |                     |                         |
| H | 3.6166369999999999       | -7.5471326000000003 | 1.6325466000000000      | C | 0.16882591E+01          | -0.26991295E+01     | 0.22277372E+01          |
| H | 3.2396501000000000       | -6.2910010999999999 | 1.2496711000000000      | C | 0.17701170E+01          | -0.137153125E+01    | 0.27153125E+01          |
| O | 2.9030382000000001       | -5.8210338000000004 | 4.8903717999999996      | O | 0.14083354E+01          | -0.43179217E+00     | 0.17094152E+01          |
| H | 2.6506406999999998       | -5.1493400999999999 | 4.2702736999999997      | C | 0.11074578E+01          | -0.11623065E+01     | 0.56177524E+00          |
| H | 2.2184889000000001       | -6.4467615000000000 | 4.7054112000000003      | C | 0.11001470E+01          | -0.26412412E+01     | 0.97196453E+00          |
| O | 1.6044168000000001       | -3.5147906999999998 | 5.7986110000000002      | O | 0.19406862E+01          | -0.10103694E+01     | 0.38898224E+01          |
| H | 2.2156056999999998       | -4.3490099999999998 | 5.7800152999999996      | C | -0.18405623E+00         | -0.66314047E+00     | -0.41269318E-01         |
| H | 1.5451611000000001       | -3.3248527000000001 | 4.8594705999999999      | O | -0.12331474E+01         | -0.79080591E+00     | 0.89798956E+00          |
| O | 0.8286492399999995       | -7.3166490000000000 | 3.7177527000000001      | O | 0.8531828799999999E-002 | -3.5227976000000001 | 7.7953898999999993E-002 |
| O | 0.61347399000000002      | -6.6869762000000001 | 2.9996103999999999      | O | 1.8828440000000000      | -3.8256039999999998 | 2.9351696000000000      |
| H | 1.5888534000000001       | -7.7488856000000004 | 3.3058231999999999      | C | -0.10611843E+00         | 0.77580357E+00      | -0.55961400E+00         |
| O | -0.21437259000000000     | -3.4704366000000002 | -2.6724122000000001     | O | -0.14108678E+01         | 0.11479511E+01      | -0.11091600E+01         |
| H | 3.5955790000000001E-002  | -4.3586841999999999 | -2.9260681000000002     | H | 0.20123035E+01          | -0.91491920E+01     | -0.44517324E-01         |
| H | 3.7909361000000003E-002  | -3.5891673000000002 | -1.7433558000000000     | H | 0.32987967E+00          | 0.14231814E+01      | 0.22643891E+00          |
| O | -2.8227975000000001      | -3.1078768999999999 | 1.0216556999999999      | H | 0.64603599E+00          | 0.78296868E+00      | -0.13656862E+01         |
| H | -2.3392127000000000      | -3.8805603000000000 | 0.62313848000000005     | H | -0.15308759E+01         | 0.21020375E+01      | -0.10295375E+01         |
| H | -2.3026875000000002      | -2.3552423999999998 | 0.74025090000000004     | H | -0.44802145E+00         | -0.13964769E+01     | -0.86897069E+00         |
| O | 1.8514603999999999       | -1.8309386999999999 | -2.6734708999999999     | H | -0.98895706E+00         | -0.37588637E+00     | 0.17195824E+01          |
| H | 2.3761727000000001       | -2.2376046999999999 | -2.0213399000000001     | O | 1.5177377000000001      | -6.1755871000000004 | 1.3341236999999999      |
| H | 0.97784157000000005      | -2.2975848000000001 | -2.4921104000000001     | H | 1.7176870000000000      | -5.3579981999999999 | 1.8706186000000000      |
|   |                          |                     |                         | H | 1.2293626000000000      | -5.7277920000000000 | 0.53209574000000004     |
| C | 0.15122821E+01           | -0.28871651E+01     | 0.22007604E+01          | O | -0.78661544000000005    | -4.1261178000000003 | 3.8860326999999999      |
| C | 0.14858721E+01           | -0.15901309E+01     | 0.28065364E+01          | H | 1.4383119999999999E-002 | -4.0299941400000001 | 3.4688789000000000      |
| O | 0.10694795E+01           | -0.59081960E+00     | 0.18820499E+01          | H | -1.0960550000000000     | -4.8321528999999996 | 3.2826293999999998      |
| C | 0.88337540E+00           | -0.13034403E+01     | 0.61075350E+00          | O | 3.2107228999999999      | -3.2748187999999998 | -1.3187913000000000     |
| C | 0.97296904E+00           | -0.27891703E+01     | 0.94192287E+00          | H | 2.5141536000000002      | -3.6961626000000001 | -0.76392521000000002    |
| O | 0.18069858E+01           | -0.11977420E+01     | 0.39639582E+01          | H | 3.9319445000000002      | -3.0496213000000001 | -0.6372919799999998     |
| C | -0.30006780E+00          | -0.71421104E+00     | -0.84760642E-01         | O | -1.5136769999999999     | -5.1664801999999996 | 0.21126909999999999     |
| O | -0.14446668E+01          | -0.78522269E+00     | 0.81349452E+00          | H | -0.63172233000000000    | -4.8171419999999996 | 0.36240791000000000     |
| O | 0.78235650000000001      | -3.6946493999999999 | 3.2855254000000000E-002 | H | -1.7177819999999999     | -5.5405540999999996 | 1.0716239000000001      |
| O | 1.9256932000000000       | -3.9187463000000000 | 2.8786545000000001      | O | 4.5902069000000001      | -3.9508000000000001 | 2.9126827000000000      |
| C | -0.95591912E-01          | 0.73752013E+00      | -0.49092499E+00         | H | 4.9097682000000002      | -4.8463503000000001 | 2.8752444000000001      |
| O | -0.13712562E+01          | 0.13249834E+01      | -0.98466697E+00         | H | 3.5580362599999999      | -3.9698381999999999 | 2.8340108000000002      |
| H | 0.17676420E+01           | -0.98947378E+00     | -0.10036895E-01         | O | 3.0230260000000002      | -5.9694023999999999 | 4.3988828000000000      |
| H | 0.22386065E+00           | 0.13518824E+01      | 0.34931102E+00          | H | 2.8912287000000001      | -5.2917800000000002 | 3.6704050000000002      |
| H | 0.66684478E+00           | 0.77179912E+00      | -0.13112112E+01         | H | 2.2376654000000000      | -6.5254402999999996 | 4.3442844000000003      |
| H | -0.14482791E+01          | 0.21363766E+01      | -0.45632927E+00         | O | 1.7182282000000000      | -3.7701093000000001 | 5.7106291999999996      |
| H | -0.57648200E+00          | -0.12456385E+01     | -0.10604625E+01         | H | 2.1826235999999999      | -4.6110075999999998 | 5.4986413000000001      |
| H | -0.11611478E+01          | -0.55674763E+00     | 0.17313358E+01          | H | 1.6790487000000001      | -3.3772812000000001 | 4.8108985000000004      |
| O | 1.2924069000000000       | -6.0887735000000003 | 1.4939106000000000      | O | 4.7510066000000002      | -2.1779750000000000 | 0.65461926000000004     |
| H | 1.0568912000000001       | -5.2948494000000004 | 1.9966934999999999      | H | 4.6383049999999999      | -2.8076555000000001 | 1.3796769000000000      |
| H | 1.0874708000000000       | -5.5207696999999998 | 0.74845923000000003     | H | 5.0102425999999998      | -1.3538912999999999 | 1.1952305000000001      |
| O | 3.2787356999999999       | -3.5464810999999998 | -1.2634500000000000     | O | 0.20472219999999999     | -3.4359882000000002 | -2.7473972000000000     |
| H | 2.4834100000000001       | -3.8126924999999998 | -0.77252178000000005    | H | 0.43263473000000002     | -4.2292056999999996 | -3.3459498999999999     |
| H | 3.8793780999999998       | -2.9754339999999999 | -0.6723081699999998     | H | 5.1527554000000003E-002 | -3.7067239000000001 | -1.8463099999999999     |
| O | -0.86885732000000004     | -4.0412077000000002 | 3.7791367000000000      | O | -2.8057808000000000     | -3.0485932999999998 | 1.4214648999999999      |
| H | 9.5269800000000002E-002  | -4.1585479999999997 | 3.7601285000000000      | H | -2.2258589999999998     | -3.6287973999999998 | 1.0043662000000000      |
| H | -1.1300140000000001      | -4.7520126999999999 | 3.1769769999999999      | H | -2.3246521000000002     | -2.1904210000000002 | 1.4203395000000001      |
| O | -1.5251307000000001      | -5.2705194000000004 | 7.1017888000000001E-002 | O | 4.1108093999999999      | -7.1931089000000004 | 1.0176955999999999      |
| H | -0.71019549000000004     | -4.6907107000000003 | 2.7438665000000001E-002 | H | 3.9090126999999999      | -8.0416427000000006 | 1.5142933999999999      |
| H | -1.5140207999999999      | -5.7008061000000003 | 0.9693096399999997      | H | 3.2546069000000002      | -6.8175692999999997 | 0.83527655000000001     |
| O | 4.6451656999999997       | -3.8329371999999999 | 2.9686275000000002      | O | -1.1444728000000000     | -1.3496338000000001 | 4.3413792000000004      |
| H | 4.7949755999999999       | -4.7767238000000001 | 3.0264850000000001      | H | -1.1586669000000001     | -2.2969081999999998 | 4.1621430000000004      |
| H | 3.6119713999999998       | -3.8683646999999999 | 2.8946288000000000      | H | -0.22485540000000001    | -1.1980510000000000 | 4.5920902000000003      |
| O | 3.0993993999999998       | -5.8827007000000000 | 4.4432675000000001      |   |                         |                     |                         |
| H | 2.7544648000000000       | -5.2203017999999997 | 3.8222255999999999      | C | 0.14317077E+01          | -0.29184453E+01     | 0.22998025E+01          |
| H | 2.3217298000000000       | -6.5222201000000002 | 4.3601884999999996      | C | 0.15998344E+01          | -0.28623697E+01     | 0.28623697E+01          |
| O | 1.5174683000000000       | -3.8571371000000001 | 5.7861364999999996      | O | 0.14019559E+01          | -0.61137177E+00     | 0.19207035E+01          |
| H | 2.1142506000000001       | -4.5682280000000004 | 5.9406203000000000      | O | 0.10096264E+01          | -0.12936437E+01     | 0.65063658E+00          |
| H | 1.6904045999999999       | -3.7087501000000000 | 4.8028963999999998      | C | 0.10353921E+01          | -0.28013863E+01     | 0.96598155E+00          |
| O | -3.1674911000000000E-002 | -3.5318822999999999 | -2.6953914000000001     | O | 0.18386699E+01          | -0.13565399E+01     | 0.40586199E+01          |
| H | 0.10737134000000000      | -4.3533075999999999 | -3.2570627000000001     | C | -0.27334441E+00         | -0.57009758E+00     | 0.66715958E-01          |
| H | -3.4766851000000001E-002 | -3.8207974999999998 | -1.7182306000000001     | O | -0.12180299E+01         | -0.37481197E+00     | 0.11272767E+01          |
| O | 1.0232007999999999       | -7.5021101999999997 | 3.5919821999999999      | O | 0.76617864000000002     | -3.7011414000000000 | 8.1937562000000005E-002 |
| H | 0.82949346000000002      | -7.0025444999999999 | 2.7929865999999999      | O | 1.6376728000000000      | -3.9727152000000001 | 3.0771929000000000      |
| H | 1.5800547000000000       | -8.2356055000000001 | 3.3187399000000002      | C | 0.11433801E+00          | 0.80776745E+00      | -0.52319309E+00         |
| O | -2.8098119000000001      | -3.0801772000000001 | 1.3446636000000001      | O | -0.11860391E+01         | 0.13521054E+01      | -0.94281975E+00         |
| H | -2.6378457000000002      | -3.9358510999999998 | 0.8813854500000001      | O | 0.17737695E+01          | -0.10972253E+01     | -0.15379971E+00         |

|   |                          |                     |                      |   |                          |                      |                     |
|---|--------------------------|---------------------|----------------------|---|--------------------------|----------------------|---------------------|
| H | 0.54892221E+00           | 0.15229968E+01      | 0.21060995E+00       | H | 2.9723339000000000       | -5.1727376999999999  | 3.9127022000000000  |
| H | 0.79791190E+00           | 0.84325366E+00      | -0.13958521E+01      | H | 2.4749061999999999       | -6.4075847000000001  | 4.5473352000000000  |
| H | -0.12607598E+01          | 0.23081684E+01      | -0.62252210E+00      | O | 4.0472362000000004       | -6.7416799999999997  | 0.7972897799999999  |
| H | -0.72102917E+00          | -0.11669920E+01     | -0.71839136E+00      | H | 4.0804893000000000       | -7.5474012999999998  | 0.2830906799999999  |
| H | -0.88615373E+00          | 0.16864600E+00      | 0.18521782E+01       | H | 3.0996956999999998       | -6.6246254999999996  | 1.0978730000000001  |
| O | 1.3839532999999999       | -6.2765439000000001 | 1.5701848000000000   | O | -0.15828558000000001     | -3.2707948000000000  | -2.5089038000000001 |
| H | 1.2580222999999999       | -5.4311211999999998 | 2.0109667000000000   | H | -0.60163745999999996     | -4.0826279000000003  | -2.7733607999999998 |
| H | 1.0509523999999999       | -6.0738232999999999 | 0.6854444100000000   | H | 0.20379175999999999      | -3.3803185999999998  | -1.5787351000000001 |
| O | -1.6445436000000000      | -5.0778353999999997 | 0.48354870999999999  | O | 1.7828170999999999       | -3.9518767000000001  | 6.0743274999999999  |
| H | -0.7490991299999999      | -4.6911320999999999 | 0.44432161999999997  | H | 2.2095349000000000       | -4.7782410000000004  | 6.4423352999999999  |
| H | -1.6510857000000001      | -5.7364050999999998 | 1.2010874000000000   | H | 2.0665496000000001       | -4.1535207999999999  | 5.1609921999999999  |
| O | -0.9924412400000000      | -3.9459379000000001 | 4.0842220999999999   | O | -2.8462920000000000      | -2.5798809999999999  | 1.5587530000000001  |
| H | -5.3045223000000002E-002 | -4.1803971999999998 | 3.7935286000000001   | H | -2.3495021000000000      | -3.3191367000000001  | 1.1159916999999999  |
| H | -1.4263317000000000      | -4.5732789000000000 | 3.4510177999999998   | H | -2.1445758000000001      | -1.9131688000000000  | 1.4134503000000000  |
| O | 4.6799413000000003       | -4.1547196000000000 | 2.6827443000000000   | O | 1.5797995000000000       | -7.9760964000000003  | 3.5640985999999999  |
| H | 4.8915649999999999       | -5.0850340000000003 | 2.5490230999999999   | H | 1.3792412999999999       | -7.2992910000000002  | 2.8582437999999999  |
| H | 3.6784948000000002       | -4.0536231999999996 | 2.6412924000000002   | H | 2.2910135999999999       | -8.5046335000000006  | 3.2161141000000000  |
| O | 3.1241663000000002       | -3.4437142999999999 | -1.4550304000000001  | O | -0.9275379599999999      | -1.0671839000000001  | 4.1856236999999998  |
| H | 2.4259466000000002       | -3.8140285000000000 | -0.89417380999999996 | H | -0.99989315000000001     | -2.0437395000000000  | 4.2599251000000002  |
| H | 3.8234094000000001       | -3.1871299999999998 | -0.84630640999999995 | H | -5.1473802999999999E-002 | -0.92140217999999996 | 4.4377256999999997  |
| O | 3.1865613000000002       | -5.8572135999999997 | 4.5056786999999998   | C | 0.14610441E+01           | -0.29089852E+01      | 0.24692164E+01      |
| H | 2.7667331000000002       | -5.0850609999999999 | 4.0051188000000000   | C | 0.18245000E+01           | -0.15621116E+01      | 0.28949434E+01      |
| H | 2.5550503999999998       | -6.6289774000000001 | 4.4248120999999996   | O | 0.16846679E+01           | -0.69724226E+00      | 0.17914133E+01      |
| O | 4.1627485999999996       | -6.7399088999999996 | 1.3772922000000001   | C | 0.12334282E+01           | -0.14137964E+01      | 0.62495238E+00      |
| H | 3.3814905999999999       | -7.4987120000000003 | 0.83931246000000004  | C | 0.11439735E+01           | -0.28645140E+01      | 0.11082466E+01      |
| H | 3.2946041999999998       | -6.3220898999999999 | 1.3836575000000000   | O | 0.21742097E+01           | -0.10106698E+01      | 0.39671633E+01      |
| O | -9.3492591000000000E-002 | -3.4220271000000002 | -2.5197858000000002  | C | -0.84699926E-01          | -0.77273834E+00      | 0.88820566E-01      |
| H | 0.4379226900000000       | -4.1172253000000003 | -2.8884211999999998  | O | -0.10968870E+01          | -0.59582691E+00      | 0.10826778E+01      |
| H | 0.1520826700000000       | -3.4720008999999998 | -1.5645309999999999  | O | 0.82696859999999996      | -3.7862545000000001  | 0.25205404999999997 |
| O | 1.6646247999999999       | -3.8170169000000000 | 5.9335646999999998   | O | 1.34279980000000001      | -3.9579197000000002  | 3.2880571999999999  |
| H | 1.9312540000000000       | -4.7092179999999999 | 5.7484652000000001   | C | 0.19793356E+00           | 0.64552791E+00       | -0.49124170E+00     |
| H | 1.4824790000000001       | -3.5105365000000002 | 5.0156751000000002   | O | -0.10042176E+01          | 0.11082730E+01       | -0.10735364E+01     |
| O | -2.7409151000000000      | -2.6074893000000001 | 1.5396056000000000   | H | 0.20127217E+01           | -0.13008736E+01      | -0.99099361E+01     |
| H | -2.2716205999999999      | -3.3631338999999998 | 1.1677848000000000   | H | 0.56317579E+00           | 0.12705724E+01       | 0.32216166E+00      |
| H | -2.0298216999999998      | -1.9239268000000000 | 1.5106702000000001   | H | 0.91506138E+00           | 0.62305157E+00       | -0.13090517E+01     |
| O | 4.6815169000000001       | -2.3929231999999998 | 0.51507486000000002  | H | -0.11512773E+01          | 0.20798846E+01       | -0.94107853E+00     |
| H | 4.7140760000000004       | -3.1287408000000001 | 1.1212806000000000   | H | -0.38963965E+00          | -0.14846258E+01      | -0.76047897E+00     |
| H | 5.1978033999999997       | -1.6661351000000000 | 0.98862766000000002  | H | -0.70259042E+00          | -0.74807667E+00      | 0.19547292E+01      |
| O | 1.2558271000000001       | -7.9284435999999996 | 3.8510038999999998   | O | 1.6757152000000000       | -6.0911033000000003  | 1.4047115999999999  |
| H | 1.0825480000000001       | -7.3987669000000000 | 3.0465713999999999   | H | 1.4243631999999999       | -5.4698212000000002  | 2.1372089999999999  |
| H | 1.9896571999999999       | -8.5839368000000000 | 3.5587715000000002   | H | 1.3395226000000000       | -5.6069825000000000  | 0.6391306799999999  |
| C | 0.16885062E+01           | -0.28885581E+01     | 0.24046318E+01       | O | -1.5110492000000000      | -5.1465373000000003  | 0.6122118899999998  |
| C | 0.19585698E+01           | -0.15592714E+01     | 0.28893593E+01       | H | -0.56672020000000001     | -5.0243764000000004  | 0.59653723999999997 |
| O | 0.16377522E+01           | -0.53169847E+00     | 0.19186227E+01       | H | -1.7349357000000001      | -5.6089918000000001  | 1.4419736000000001  |
| C | 0.12204372E+01           | -0.12173119E+01     | 0.69344733E+00       | O | -1.1787504000000000      | -3.9345414999999999  | 4.3842999999999996  |
| C | 0.11747421E+01           | -0.27053657E+01     | 0.11085448E+01       | H | -0.39223112999999998     | -4.3048434999999996  | 3.8106575000000000  |
| O | 0.23242773E+01           | -0.11673562E+01     | 0.40015140E+01       | H | -1.8938514000000000      | -3.9771069999999999  | 3.7074432000000002  |
| C | -0.15640267E+00          | -0.63213244E+00     | 0.11128775E+00       | O | 3.4520476000000002       | -3.8011851999999999  | -1.1220467000000001 |
| O | -0.12021475E+01          | -0.46822004E+00     | 0.11578417E+01       | H | 2.7153418999999999       | -4.1393576000000003  | -0.5560717499999998 |
| O | 0.71254795999999998      | -3.6037606000000002 | 0.24291335999999999  | H | 4.2451597999999997       | -3.7882175000000000  | -0.5277455500000001 |
| O | 1.7553243000000001       | -4.0095780000000003 | 3.1037599999999999   | O | 3.1619863000000001       | -5.5109323999999997  | 4.4866440000000001  |
| C | 0.10881777E+00           | 0.75790567E+00      | -0.48306258E+00      | H | 2.6299041999999999       | -4.7400893999999996  | 4.1998021999999997  |
| O | -0.10394989E+01          | 0.14054206E+01      | -0.10449081E+01      | H | 2.5024199000000000       | -6.1888290000000001  | 4.4921331000000002  |
| H | 0.19669586E+01           | -0.10275696E+01     | -0.32206843E-01      | O | 0.24005708000000001      | -3.7129764999999999  | -2.3222071000000000 |
| H | 0.61626990E+00           | 0.13816563E+01      | 0.32664705E+00       | H | 0.62501808000000003      | -4.5459838000000001  | -2.4058628000000000 |
| H | 0.83122731E+00           | 0.68841199E+00      | -0.13483653E+01      | H | 0.15928112999999999      | -3.6507288999999998  | -1.3040346000000000 |
| H | -0.13053746E+01          | 0.22111094E+01      | -0.57931161E+00      | O | -2.7090862000000002      | -2.7616949000000002  | 1.0930419000000000  |
| H | -0.57476472E+00          | -0.12357650E+01     | -0.63696582E+00      | H | -2.1284149000000001      | -3.6007254999999998  | 1.0176016999999999  |
| H | -0.67685824E+00          | -0.24058622E+00     | 0.19494109E+01       | H | -2.0161923000000002      | -2.0003082999999999  | 1.1457284999999999  |
| O | 1.4416446000000001       | -6.0945568000000003 | 1.5918520000000000   | O | 1.5348430000000000       | -3.5864468999999999  | 6.0074291000000004  |
| H | 1.5937387999999999       | -5.2066871000000003 | 2.1123725000000002   | H | 1.2738536000000000       | -4.5011931000000001  | 6.1238203000000002  |
| H | 0.8751921799999999       | -5.6355800000000000 | 0.96929522999999995  | H | 1.5290798000000001       | -3.5289912000000001  | 5.0640359000000004  |
| O | -1.7401911999999999      | -4.8221125000000002 | 0.33891253999999998  | O | 4.3545657999999996       | -6.3487064999999996  | 0.54127902000000006 |
| H | -0.83081258999999996     | -4.5092600000000003 | 0.55638120999999996  | H | 4.4762269999999997       | -7.3263267000000001  | 0.36362137999999999 |
| H | -1.8877400000000000      | -5.3393690999999999 | 1.1884775999999999   | H | 3.3472914999999999       | -6.2708729999999999  | 0.55954678999999996 |
| O | -0.92895145000000001     | -3.7646746000000002 | 4.1727914000000004   | O | 1.6251709999999999       | -7.7451319999999999  | 3.5729722000000002  |
| H | -6.2751599000000005E-002 | -4.1367101000000002 | 3.9796925000000001   | H | 1.5202004000000000       | -7.2157419999999997  | 2.7785619000000001  |
| H | -1.4145652000000000      | -4.2388808999999998 | 3.4789439000000000   | H | 2.2660377000000000       | -8.4117622999999995  | 3.2506317999999998  |
| O | 3.1925218000000002       | -3.4128207000000002 | -1.3787639000000000  | O | -0.61160988999999999     | -1.3250565999999999  | 4.8277307000000000  |
| H | 3.0214036000000002       | -4.0572891000000002 | -0.68355171000000003 | H | -0.84358000000000000     | -2.2953453000000001  | 4.5919847000000003  |
| H | 3.9059276000000001       | -2.8654842000000000 | -0.9069733899999999  | H | 0.35264988000000003      | -1.3940482999999999  | 4.8437276999999996  |
| O | 4.9916533999999997       | -4.3278663000000002 | 2.3153223999999999   | O | 4.7279131999999997       | -2.2117572000000001  | 0.7838363600000001  |
| H | 4.7051432000000002       | -5.1675452000000002 | 1.8259950000000000   | H | 4.7406325000000002       | -2.7827676000000001  | 1.5668118000000000  |
| H | 4.0981828000000000       | -3.9806691000000001 | 2.5867580000000001   | H | 5.1781318000000001       | -1.3931861000000001  | 1.1024300000000000  |
| O | 3.1942409999999999       | -5.7773984000000000 | 4.6356415000000002   |   |                          |                      |                     |

|   |                      |                      |                      |   |                         |                      |                      |
|---|----------------------|----------------------|----------------------|---|-------------------------|----------------------|----------------------|
| C | 0.14028332E+01       | -0.30092635E+01      | 0.24581465E+01       | O | -1.5483750000000001     | -5.1830610999999998  | 0.62997143000000000  |
| C | 0.18723855E+01       | -0.17268199E+01      | 0.28360600E+01       | H | -0.79159740000000001    | -4.5087278000000000  | 0.74420312000000000  |
| O | 0.17617132E+01       | -0.84125694E+00      | 0.18166192E+01       | H | -1.5955109000000001     | -5.5451975000000000  | 1.53770750000000000  |
| C | 0.12249301E+01       | -0.16007592E+01      | 0.62181759E+00       | O | -0.77653930000000004    | -4.45419020000000002 | 4.31438130000000000  |
| C | 0.10106946E+01       | -0.29791535E+01      | 0.11136972E+01       | H | 0.10504980000000000     | -4.4869881999999999  | 3.87079579999999998  |
| O | 0.23446408E+01       | -0.12563426E+01      | 0.38904146E+01       | H | -1.36385830000000000    | -4.85917819999999997 | 3.65713059999999999  |
| C | -0.11768025E+00      | -0.94994282E+00      | 0.19535063E+00       | O | 0.30651218999999999     | -3.6753396999999999  | -1.18795600000000000 |
| O | -0.10278465E+01      | -0.96025043E+00      | 0.12818282E+01       | H | 2.31485990000000001     | -4.21434870000000004 | -0.90792490000000003 |
| O | 0.60871209000000004  | -3.9239369000000002  | 0.31109645000000002  | H | 3.43537149999999998     | -3.42309779999999999 | -0.34102207000000001 |
| O | 1.32760389999999999  | -4.0270685000000004  | 3.32319700000000000  | O | 3.35661429999999999     | -5.67408320000000001 | 4.74651499999999996  |
| C | 0.10559049E+00       | 0.57250503E+00       | -0.21641651E+00      | H | 2.83390759999999999     | -4.98158519999999996 | 4.18172989999999997  |
| O | -0.10221341E+01      | 0.10963007E+01       | -0.87965156E+00      | H | 2.85110919999999998     | -6.40055209999999996 | 4.44188389999999997  |
| H | 0.20356575E+01       | -0.15166379E+01      | -0.14994861E+00      | O | 0.29810567999999998     | -3.68807650000000002 | -2.33898590000000000 |
| H | 0.25511847E+00       | 0.11194532E+01       | 0.70883299E+00       | H | 0.65666809999999998     | -4.55959770000000003 | -2.39777950000000000 |
| H | 0.10003751E+01       | 0.63854013E+00       | -0.83542015E+00      | H | 0.12581279000000001     | -3.71939010000000000 | -1.35521190000000000 |
| H | -0.85477051E+00      | 0.20575853E+01       | -0.94723619E+00      | O | 1.75538930000000000     | -3.78983090000000001 | 5.87750850000000002  |
| H | -0.63879343E+00      | -0.16030491E+01      | -0.51213780E+00      | H | 2.33356709999999998     | -4.56529200000000003 | 5.90941229999999996  |
| H | -0.70783127E+00      | -0.37056034E+00      | 0.20099119E+01       | H | 1.47853609999999999     | -3.86685480000000000 | 4.96053389999999997  |
| O | 1.73647330000000001  | -6.0796559999999999  | 1.60998179999999999  | O | -0.62054739000000003    | -1.54024739999999999 | 4.74034300000000002  |
| H | 1.63324059999999999  | -5.46924429999999997 | 2.37885780000000000  | H | -0.48497802000000001    | -2.49671030000000002 | 4.53717550000000000  |
| H | 1.16327540000000001  | -5.61212330000000004 | 0.89801777999999999  | H | 0.30565205000000001     | -1.18946080000000000 | 4.73696059999999997  |
| O | -1.13491780000000000 | -4.03733810000000004 | 4.26507629999999996  | O | -2.97845659999999998    | -2.71139319999999998 | 0.87923951000000000  |
| H | -0.29965195000000000 | -4.06398300000000003 | 3.79954610000000001  | H | -2.41282340000000002    | -3.48126710000000002 | 0.77374982999999997  |
| H | -1.50726840000000001 | -4.88292660000000002 | 3.91799639999999998  | H | -2.29391360000000002    | -2.05201499999999999 | 0.82236047000000000  |
| O | -1.78656189999999999 | -5.21836280000000004 | 0.54937287999999995  | O | 4.62447090000000004     | -6.75783799999999996 | 1.01624700000000000  |
| H | -0.86730046000000005 | -4.87689210000000001 | 0.55508199000000003  | H | 4.57623529999999996     | -7.65647219999999996 | 0.64722214000000000  |
| H | -1.93895250000000001 | -5.76789039999999996 | 1.49126350000000001  | H | 3.64454099999999998     | -6.65692009999999998 | 1.30878860000000000  |
| O | 3.38752470000000002  | -3.68188449999999998 | -1.04276759999999999 | O | 4.78206470000000003     | -2.16690020000000002 | 0.48458801000000001  |
| H | 2.67168800000000001  | -3.88053450000000000 | -0.37626853999999998 | O | 4.66845110000000004     | -2.76342579999999998 | 1.27192010000000000  |
| H | 3.95233379999999999  | -3.05764960000000000 | -0.61728081000000001 | H | 5.62395949999999998     | -1.77349990000000000 | 0.83471132000000003  |
| O | 3.07709510000000002  | -5.55177820000000002 | 4.72048109999999998  | O | 1.61237100000000000     | -7.95625499999999998 | 3.82420550000000001  |
| H | 2.87826689999999999  | -4.75990730000000001 | 4.09728539999999996  | H | 1.48735990000000000     | -7.52562330000000003 | 2.95036679999999998  |
| H | 2.55604780000000000  | -6.19592489999999996 | 4.31803370000000000  | H | 2.39459830000000002     | -8.56163749999999998 | 3.53396340000000002  |
| O | 0.35089641999999999  | -4.03691729999999998 | -2.23883989999999999 |   |                         |                      |                      |
| H | 1.06059020000000000  | -4.67651069999999997 | -2.29186589999999999 | C | 0.14857108E+01          | -0.28576461E+01      | 0.23987529E+01       |
| H | 0.31576260000000000  | -3.92340110000000000 | -1.31142770000000001 | C | 0.17869774E+01          | -0.15663546E+01      | 0.28639913E+01       |
| O | 1.51096990000000001  | -3.69074040000000001 | 6.04143269999999997  | O | 0.16022816E+01          | -0.64305760E+00      | 0.18402110E+01       |
| H | 1.97414130000000001  | -4.58383260000000000 | 5.95102650000000002  | C | 0.12463888E+01          | -0.13094361E+01      | 0.60965441E+00       |
| H | 1.36198299999999999  | -3.54054070000000002 | 5.05991479999999996  | C | 0.11747409E+01          | -0.27691922E+01      | 0.10114829E+01       |
| O | -0.69582769000000000 | -1.44306090000000001 | 4.81286120000000004  | O | 0.20822816E+01          | -0.11484053E+01      | 0.40142144E+01       |
| H | -0.79817294000000005 | -2.32487610000000000 | 4.39787359999999996  | C | -0.16222850E-01         | -0.69175585E+00      | 0.79583253E-01       |
| H | 0.24981537000000001  | -1.49529530000000000 | 4.93663469999999999  | O | -0.11373806E+01         | -0.80436948E+00      | 0.10225075E+01       |
| O | -2.87242700000000001 | -2.89748250000000002 | 0.81147230999999997  | O | 0.91823957000000000     | -3.69740329999999999 | 0.21031510000000000  |
| H | -2.40237729999999999 | -3.79759899999999999 | 0.64234943000000000  | O | 1.41141760000000000     | -3.90693480000000002 | 3.22819769999999999  |
| H | -2.30888100000000000 | -2.30835059999999998 | 1.09853289999999999  | C | 0.20677906E+00          | 0.72688462E+00       | -0.37996697E+00      |
| O | 4.45571759999999998  | -6.72067579999999996 | 1.05675720000000001  | O | -0.83346517E+00         | 0.10935782E+01       | -0.1177605E+01       |
| H | 4.19486399999999999  | -7.35445469999999998 | 0.38972510999999999  | H | 0.20489704E+01          | -0.11178274E+01      | -0.11028847E+00      |
| H | 3.56589940000000002  | -6.57927809999999998 | 1.37588939999999999  | H | 0.52096591E+00          | 0.13443938E+01       | 0.54020081E+00       |
| O | 1.80642930000000000  | -7.98366199999999998 | 3.65391420000000000  | H | 0.11381025E+01          | 0.73580222E+00       | -0.92087575E+00      |
| H | 1.73989050000000000  | -7.60542680000000000 | 2.75874640000000002  | H | -0.11259002E+01         | 0.20059114E+01       | -0.95092875E+00      |
| H | 2.59368670000000001  | -8.49125090000000007 | 3.44215740000000001  | H | -0.33546142E+00         | -0.11930733E+01      | -0.79563826E+00      |
| O | 4.75630869999999999  | -2.21794689999999998 | 0.830999330000000004 | H | -0.82299424E+00         | -0.44586506E+00      | 0.18905115E+01       |
| H | 4.84480239999999998  | -3.05306360000000002 | 1.37477610000000001  | O | 1.76478700000000001     | -6.14006139999999996 | 1.43721750000000000  |
| H | 5.21846880000000001  | -1.60719240000000000 | 1.45780700000000001  | H | 1.44619800000000001     | -5.56422479999999999 | 2.16026650000000001  |
|   |                      |                      |                      | H | 1.66910420000000000     | -5.56205630000000001 | 0.63325224000000002  |
| C | 0.15686407E+01       | -0.30190364E+01      | 0.23820805E+01       | O | -1.35159959999999999    | -5.07750599999999996 | 0.80331459999999999  |
| C | 0.19021299E+01       | -0.16693253E+01      | 0.28110732E+01       | H | -0.509333561000000005   | -4.66310390000000003 | 0.85358924000000003  |
| O | 0.16956507E+01       | -0.75938340E+00      | 0.18205836E+01       | H | -1.33461380000000001    | -5.71062240000000001 | 1.59499250000000000  |
| C | 0.12183966E+01       | -0.14227252E+01      | 0.65775658E+00       | O | -1.01530900000000000    | -4.26480480000000003 | 4.39905300000000003  |
| C | 0.10432511E+01       | -0.28396683E+01      | 0.11140341E+01       | H | -0.18244812999999999    | -4.22187870000000004 | 3.88658189999999999  |
| O | 0.23303262E+01       | -0.11959088E+01      | 0.38594107E+01       | H | -1.38085940000000001    | -5.10690750000000002 | 3.97523990000000000  |
| C | -0.75677386E-01      | -0.77798649E+00      | 0.20415494E+00       | O | 3.35559070000000000     | -5.20093979999999996 | 4.47077819999999998  |
| O | -0.11107471E+01      | -0.80519276E+00      | 0.12076072E+01       | H | 2.61818540000000002     | -4.82378320000000003 | 3.96368280000000000  |
| O | 0.55871428999999995  | -3.70783830000000001 | 0.32950257999999999  | H | 2.90321590000000002     | -6.03765929999999996 | 4.59088709999999998  |
| O | 1.61175000000000000  | -4.15093129999999999 | 3.12506679999999999  | O | 3.23455799999999998     | -3.29714559999999999 | -1.66943760000000000 |
| C | 0.25712398E+00       | 0.61923769E+00       | -0.31564204E+00      | H | 2.50882659999999999     | -3.56321049999999998 | -1.06548810000000000 |
| O | -0.84540418E+00      | 0.92375786E+00       | -0.11958927E+01      | H | 3.73322919999999998     | -2.60651149999999999 | -1.21302800000000000 |
| H | 0.19929017E+01       | -0.14376617E+01      | -0.11293606E+00      | O | -0.14499980000000001    | -3.76377830000000001 | -2.33711579999999999 |
| H | 0.17307470E+00       | 0.13124297E+01       | 0.51232962E+00       | H | 6.8036315999999999E-002 | -4.71617659999999998 | -2.21351170000000002 |
| H | 0.11207653E+01       | 0.66984472E+00       | -0.94244026E+00      | H | 0.15387543000000001     | -3.52327700000000002 | -1.43676359999999999 |
| H | -0.94441311E+00      | 0.19280768E+01       | -0.12037783E+01      | O | -2.78133900000000000    | -2.89783079999999999 | 1.00484770000000000  |
| H | -0.42918678E+00      | -0.13920353E+01      | -0.63725819E+00      | H | -2.20229620000000001    | -3.75444530000000000 | 0.99919073999999997  |
| H | -0.65763113E+00      | -0.73962653E+00      | 0.20418368E+01       | H | -2.08834590000000002    | -2.22202820000000000 | 0.88395407000000004  |
| O | 2.02463740000000000  | -6.42548320000000004 | 1.42334319999999999  | O | 1.97103180000000000     | -3.41222320000000001 | 6.03379330000000001  |
| H | 1.79787509999999999  | -5.70665029999999997 | 2.07060720000000000  | H | 2.47980190000000000     | -4.19073220000000002 | 5.79757570999999997  |
| H | 1.61188120000000000  | -6.12382649999999998 | 0.59788220000000003  | H | 1.77826880000000000     | -3.09374450000000001 | 5.11627649999999997  |

|   |                          |                     |                     |   |                         |                     |                     |
|---|--------------------------|---------------------|---------------------|---|-------------------------|---------------------|---------------------|
| O | 4.6721883999999996       | -2.1098835999999999 | 0.7972446500000000  | O | 1.2227980000000001      | -3.8479988999999999 | 0.3684799000000003  |
| H | 4.7269148000000003       | -2.9280512999999999 | 1.2947715000000000  | O | 1.4219560000000000      | -4.1464816000000004 | 3.3287105000000001  |
| H | 5.1323319999999999       | -1.4560556000000000 | 1.3754280999999999  | C | 0.45690546E+00          | -0.45537762E+00     | -0.45537762E+00     |
| O | 1.2767694999999999       | -7.8659138999999998 | 3.7202576000000001  | O | -0.69530555E+00         | 0.10744513E+01      | -0.11144371E+01     |
| H | 1.4151088000000001       | -7.2916347999999997 | 2.9774676000000002  | H | 0.23657517E+01          | -0.11466632E+01     | 0.20532494E+00      |
| H | 2.0454895999999998       | -8.4810262000000005 | 3.4921096000000000  | H | 0.84812385E+00          | 0.12439636E+01      | 0.33838266E+00      |
| O | 4.5418228999999997       | -6.9542088000000000 | 1.1667303000000000  | H | 0.12441129E+01          | 0.51626608E+00      | -0.12022512E+01     |
| H | 4.5653639999999998       | -7.7187507000000002 | 0.6171911500000002  | H | -0.87999560E+00         | 0.19093994E+01      | -0.67134494E+00     |
| C | 3.5958874999999999       | -6.7203556999999998 | 1.3129713999999999  | H | -0.12647592E+00         | -0.15374702E+01     | -0.78725821E+00     |
| O | -1.0158944999999999      | -1.5467701000000000 | 4.4812516999999996  | H | -0.75774840E+00         | -0.45356032E+00     | 0.18029163E+01      |
| H | -1.1223356000000000      | -2.5813022000000001 | 4.6468318999999996  | O | 2.1187697000000001      | -6.2146324999999996 | 1.5010128000000000  |
| H | -0.1066860600000000      | -1.3908841000000001 | 4.6315625999999996  | H | 1.9169936000000001      | -5.4288334999999996 | 2.0798003999999999  |
| C | 0.15031963E+01           | -0.29591761E+01     | 0.25488906E+01      | H | 1.6354481000000001      | -5.7970804999999999 | 0.7875691900000003  |
| C | 0.18237702E+01           | -0.15893718E+01     | 0.30489554E+01      | O | -1.1501423000000000     | -5.2763831000000003 | 0.4035255899999999  |
| O | 0.17986238E+01           | -0.67182866E+00     | 0.20145519E+01      | H | -0.2161524800000001     | -4.9131966000000000 | 0.4578070400000000  |
| C | 0.14925750E+01           | -0.14194327E+01     | 0.78837526E+00      | H | -1.3841654000000001     | -5.3385721000000004 | 1.3394670000000000  |
| C | 0.13409976E+01           | -0.28341760E+01     | 0.11856383E+01      | O | -1.1653099000000000     | -4.0451357999999997 | 4.2612652999999999  |
| O | 0.20964601E+01           | -0.11331928E+01     | 0.41539814E+01      | O | -0.26444526000000002    | -4.1986480000000004 | 3.9455949999999999  |
| C | 0.25237767E+00           | -0.83555382E+00     | 0.51544332E-01      | H | -1.6423679000000000     | -4.4540379999999997 | 3.5313452999999999  |
| O | -0.95191510E+00          | -0.86323664E+00     | 0.86578519E+00      | O | 3.7880707999999998      | -5.3319169000000004 | 4.1923066000000002  |
| O | 1.1313539999999999       | -3.7630322000000000 | 0.3229846699999997  | H | 2.9866744999999999      | -4.7224632000000000 | 4.0283540000000002  |
| O | 1.3851580999999999       | -4.0680835000000002 | 3.2286614000000000  | H | 3.4604471000000001      | -6.1284352999999997 | 4.5490496000000000  |
| C | 0.55059806E+00           | -0.39075381E+00     | -0.39075381E+00     | O | 3.7045878000000001      | -3.3232349000000001 | -0.9876437200000000 |
| O | -0.62022504E+00          | 0.11218903E+01      | -0.10826748E+01     | H | 2.9770593999999999      | -3.5859344000000002 | -0.4663175600000002 |
| H | 0.23872600E+01           | -0.12192338E+01     | 0.83967331E-01      | H | 4.2496555999999996      | -2.8010931999999999 | -0.3947882200000002 |
| H | 0.65228804E+00           | 0.11634545E+01      | 0.55144524E+00      | O | 0.15975634999999999     | -3.8364338999999998 | -2.2855037999999999 |
| H | 0.13697366E+01           | 0.49428946E+00      | -0.10644750E+01     | H | 0.19166960999999999     | -4.7657144000000002 | -2.3470312000000000 |
| H | -0.31402900E+00          | 0.20233467E+01      | -0.11364950E+01     | H | 0.39980453999999999     | -3.7043702000000001 | -1.3392986000000000 |
| H | 0.35065319E-01           | -0.14733946E+01     | -0.85830300E+00     | O | 1.6966611000000000      | -4.2093164000000002 | 6.1078261999999999  |
| H | -0.81177332E+00          | -0.21011633E+00     | 0.15878995E+01      | H | 2.4868119000000002      | -4.7439518999999999 | 5.9863530000000003  |
| O | 1.8437669999999999       | -6.1908446000000001 | 1.5566936000000000  | H | 1.49613339999999999     | -3.9771149000000001 | 5.2072732999999999  |
| H | 1.6918688000000000       | -5.5063043000000000 | 2.2491720000000002  | O | 1.41916219999999999     | -7.9349926999999996 | 3.7065153999999998  |
| H | 1.4590057000000001       | -5.6220670999999997 | 0.8182640399999997  | H | 1.42521729999999999     | -7.2097648999999997 | 3.0260452000000000  |
| O | -1.2339173999999999      | -5.1661902000000000 | 0.50302036000000006 | H | 2.0869010000000001      | -8.5046060000000008 | 3.3863132999999999  |
| H | -0.3823235500000001      | -4.7660482999999996 | 0.70905059000000004 | O | 4.70589899999999996     | -6.9192815000000003 | 1.3380985999999999  |
| H | -1.4281171000000001      | -5.6045138999999997 | 1.3324666000000001  | H | 4.4985102000000001      | -7.6435233000000000 | 0.6918081999999998  |
| O | 3.4578397000000001       | -5.1078679999999999 | 4.1134914000000000  | H | 3.7844072000000000      | -6.6089596000000001 | 1.5262035000000000  |
| H | 2.7700255999999999       | -4.7015744000000002 | 3.6262511000000002  | O | -2.7842620999999999     | -3.1092871000000000 | 0.3687167599999998  |
| C | 3.2147529000000001       | -6.0384846999999997 | 4.0522140000000002  | H | -2.2480638000000002     | -3.9439335000000000 | 0.3397846199999998  |
| O | -0.9754947200000004      | -4.1491513000000000 | 4.4341013000000000  | O | -2.0830457000000000     | -2.4653290000000001 | 0.4549113100000001  |
| O | -0.1640177900000000      | -4.1340271000000000 | 3.8568593000000000  | H | -0.71520373999999998    | -1.3498451000000000 | 4.7039907999999997  |
| H | -1.4623381000000000      | -4.8631827999999997 | 4.0113481000000002  | H | -0.86175323999999998    | -2.3188941999999999 | 4.7373173000000000  |
| C | 3.5337811000000001       | -3.3030290000000000 | -1.1877025999999999 | H | 0.22709304999999999     | -1.3906970000000001 | 4.6086894000000003  |
| H | 2.6509966000000000       | -3.5047742000000000 | -0.8633767100000005 | O | 5.6004379999999996      | -4.6078703000000001 | 2.4011616000000000  |
| H | 3.9090462000000001       | -3.0975844000000001 | -0.2906887200000001 | H | 5.9581779999999998      | -5.3991107999999999 | 1.7328273999999999  |
| O | -2.8116927000000000E-002 | -3.9905336999999999 | -2.1436434000000002 | H | 4.9932192999999998      | -4.9830896200000000 | 3.0538932000000001  |
| H | 8.1974501000000005E-002  | -4.9438551000000004 | -2.2412033000000000 | C | 0.16019092E+01          | -0.27646708E+01     | 0.24436244E+01      |
| H | 6.0913598999999999E-002  | -3.9294563999999998 | -1.2084937000000000 | O | 0.18309432E+01          | -0.15257748E+01     | 0.30079831E+01      |
| O | 1.8903323999999999       | -3.9118347000000000 | 6.0238315000000000  | C | 0.16922494E+01          | -0.52897412E+00     | 0.19884341E+01      |
| H | 2.5403139000000001       | -4.6889475999999997 | 5.8872543999999998  | C | 0.16073505E+01          | -0.12038975E+01     | 0.72114931E+00      |
| H | 1.6023284000000000       | -3.8149856000000000 | 5.0885793000000001  | C | 0.16098950E+01          | -0.26112330E+01     | 0.10426953E+01      |
| O | 1.7062552000000000       | -7.7091598000000001 | 3.7157979000000001  | O | 0.20738336E+01          | -0.11558369E+01     | 0.41814799E+01      |
| H | 1.7183717999999999       | -7.3793419000000000 | 2.7966017000000001  | C | 0.40817646E+00          | -0.71794903E+00     | -0.95040229E-01     |
| H | 2.3046217000000002       | -8.4591360000000009 | 3.7070934000000002  | O | -0.77981619E+00         | -0.83518769E+00     | 0.75549616E+00      |
| O | -2.7942849999999999      | -3.0743117999999998 | 0.78584089999999995 | O | 1.4127433000000000      | -3.5665174999999998 | 0.22444715000000001 |
| H | -2.2665931000000001      | -3.8846177000000002 | 0.56921261999999995 | O | 1.5348474000000001      | -3.8960708999999998 | 3.1819329000000001  |
| H | -2.1138938999999999      | -2.3802021000000000 | 1.0370953000000001  | C | 0.44551483E+00          | 0.76101485E+00      | -0.46719246E+00     |
| O | 4.4249342000000000       | -7.1330369999999999 | 1.4967884000000000  | O | -0.61540995E+00         | 0.96263101E+00      | -0.15074602E+01     |
| H | 4.2168633000000000       | -7.5649125000000002 | 0.59796053999999998 | H | 0.25500623E+01          | -0.96751538E+00     | 0.21051363E+00      |
| C | 3.5096316999999999       | -6.8883928000000001 | 1.7949323000000000  | H | 0.13840079E+00          | 0.13634368E+01      | 0.44706535E+00      |
| O | -0.82555928999999995     | -1.3711005999999999 | 4.9398932999999996  | H | 0.14523772E+01          | 0.10474265E+01      | -0.82976941E+00     |
| H | -0.9945244500000000      | -2.2864341000000001 | 4.6916482999999998  | H | -0.97087209E+00         | 0.18399246E+01      | -0.14714635E+01     |
| H | 0.15037563000000001      | -1.4427542000000000 | 5.1408506999999997  | H | 0.24400563E+00          | -0.13600473E+01     | -0.94278434E+00     |
| O | 5.6296897000000001       | -4.4960880999999997 | 2.4769874000000001  | H | -0.53578229E+00         | -0.43599749E+00     | 0.15969685E+01      |
| H | 5.5021613000000000       | -4.9322844999999997 | 1.6137092000000000  | O | 1.8528574000000000      | -6.0614122000000004 | 1.5639571000000001  |
| H | 4.9682307000000003       | -5.0089388000000001 | 3.0536431999999998  | H | 1.6291815000000001      | -5.3820034000000003 | 2.2738996000000000  |
| C | 0.15339471E+01           | -0.30045858E+01     | 0.26130672E+01      | H | 1.6970202999999999      | -5.5190982000000002 | 0.7809073199999996  |
| C | 0.17059147E+01           | -0.17148470E+01     | 0.31114058E+01      | O | -0.83473523000000005    | -5.2663266000000002 | 0.5446290600000000  |
| O | 0.16245936E+01           | -0.78442501E+00     | 0.20237794E+01      | H | 5.6797981999999997E-002 | -4.8656611999999999 | 0.6813893500000000  |
| C | 0.14382958E+01           | -0.14063494E+01     | 0.79388657E+00      | H | -0.96760758000000002    | -5.6026004000000000 | 1.4003274000000001  |
| C | 0.14230631E+01           | -0.29120177E+01     | 0.11797100E+01      | O | 3.61563660000000002     | -5.6316290999999996 | 4.2177695000000002  |
| O | 0.19493885E+01           | -0.11923206E+01     | 0.42239997E+01      | H | 2.9717840000000000      | -5.1527240000000001 | 3.6134724000000000  |
| C | 0.22358298E+00           | -0.89321787E+00     | 0.47378581E-01      | H | 2.9883101999999999      | -6.2498202999999997 | 4.6103481000000004  |
| O | -0.93221521E+00          | -0.91293754E+00     | 0.93839320E+00      | O | -1.0640775000000000     | -4.1844919000000003 | 4.3531434999999998  |
|   |                          |                     |                     | H | -0.18513336999999999    | -4.1926430999999997 | 3.9803768000000002  |



|   |                          |                     |                     |   |                          |                     |                      |
|---|--------------------------|---------------------|---------------------|---|--------------------------|---------------------|----------------------|
| H | 0.14587750E-01           | -0.90685295E+00     | -0.86584702E+00     | H | 2.3804631999999999       | -4.8043325000000001 | 6.0730544000000002   |
| H | -0.53515648E+00          | -0.87358406E+00     | 0.17945224E+01      | H | 1.4792543000000000       | -0.0346380999999996 | 5.1590638000000002   |
| O | 1.8157395999999999       | -5.7097573999999999 | 1.7693132000000000  | O | 4.3211196999999997       | -6.6779614000000000 | 0.93852846000000001  |
| H | 1.7326657000000001       | -5.2503498999999998 | 2.5186343000000000  | H | 4.1907696999999997       | -7.4948075000000003 | 0.43037670000000000  |
| H | 1.7880902000000001       | -5.2358212000000002 | 1.0946830999999999  | H | 3.3940530000000000       | -6.4153609999999996 | 1.2204770000000000   |
| O | -0.9688193099999999      | -4.8029050000000000 | 0.5345595199999995  | O | -0.8227983700000000      | -1.5116061000000001 | 4.62101170000000004  |
| H | -6.3733308000000002E-002 | -4.5303145999999996 | 0.4235981100000003  | H | 1.0604639999999999       | -2.4078281000000001 | 4.28169670000000004  |
| H | -0.9776698999999998      | -5.3648870999999998 | 1.3430603999999999  | H | 7.4035803999999997E-002  | -1.6337489000000001 | 4.90869490000000004  |
| O | -1.0590577999999999      | -4.2751418000000001 | 4.2519985000000000  | O | 1.3301338000000000       | -7.9147732000000000 | 3.51108790000000002  |
| H | -0.11451172000000000     | -4.1041025000000000 | 4.1310253000000001  | H | 1.3622810999999999       | -7.2628998999999999 | 2.8197942999999999   |
| H | -1.1394508000000001      | -5.1286949999999996 | 3.8549093999999999  | H | 2.0438729000000002       | -8.5931025999999999 | 3.1970926000000000   |
| O | 3.9082496000000000       | -3.5937252000000002 | -1.3217386000000000 | O | -1.3355642999999999      | -6.1740133999999998 | 2.9593056000000000   |
| H | 3.1676704000000000       | -3.4393582999999999 | -0.7214833299999998 | H | -0.6973104000000000      | -6.8638250999999997 | 3.1995784999999999   |
| H | 4.5895865000000002       | -3.0063157000000000 | -0.8360216400000001 | H | -2.1872571999999999      | -6.5539895000000001 | 3.2595784999999999   |
| O | 3.7190409999999999       | -5.2055270000000000 | 4.1541107000000004  | O | 5.8285863999999998       | -4.6378271000000000 | 2.6093651000000002   |
| H | 2.9758148000000002       | -4.5987210999999997 | 4.0052950999999997  | H | 5.5232543999999999       | -5.4336589999999996 | 2.0757884000000000   |
| H | 3.3551422000000000       | -5.9798413000000004 | 3.8914773999999999  | H | 4.9700563999999998       | -4.5159098000000002 | 3.0263662000000000   |
| O | 8.2708639000000000E-002  | -3.8350602000000000 | -2.3503759999999998 |   |                          |                     |                      |
| H | 0.4370184799999999       | -4.7044132000000003 | -2.6507453200000000 | C | 0.15695037E+01           | -0.26664354E+01     | 0.25835940E+01       |
| H | 0.2490736600000000       | -3.9021306999999998 | -1.3550560000000000 | C | 0.17950055E+01           | -0.13111260E+01     | 0.29763773E+01       |
| O | 1.6118767000000001       | -3.8740896999999999 | 6.0105877999999999  | O | 0.17420916E+01           | -0.39912410E+00     | 0.19521569E+01       |
| H | 2.1691449999999999       | -4.6136825999999997 | 6.0166298999999999  | C | 0.152573337E+01          | -0.11235507E+01     | 0.67660233E+00       |
| H | 1.6130941000000001       | -3.6740439000000000 | 5.0110241000000002  | C | 0.15130291E+01           | -0.26209812E+01     | 0.11734537E+01       |
| O | 4.3856636000000000       | -6.8308241000000001 | 1.3044560999999999  | O | 0.18340964E+01           | -0.79906026E+00     | 0.41519687E+01       |
| H | 4.2444376000000004       | -7.6482424000000000 | 0.7695966100000001  | C | 0.21444302E+00           | -0.63255061E+00     | 0.11112860E-02       |
| H | 3.5343068000000000       | -6.6348610000000003 | 1.4637673000000000  | O | -0.94752756E+00          | -0.10215052E+01     | 0.71661289E+01       |
| O | -2.7206869000000000      | -2.7565957000000001 | 0.9130367600000000  | O | 1.3235030999999999       | -3.6274920000000002 | 0.3416964300000000   |
| H | -2.3010698000000001      | -3.5876025000000000 | 0.6539567899999995  | O | 1.5479655999999999       | -3.6564850000000000 | 3.4694680999999998   |
| H | -1.8969826000000001      | -2.1750994000000001 | 0.8151471099999995  | C | 0.35762666E+00           | 0.96420709E+00      | -0.34121033E-01      |
| O | -0.72367835000000003     | -1.6126948999999999 | 4.8197899000000000  | O | -0.71755060E+00          | 0.15346777E+01      | -0.90649834E+00      |
| H | -0.9140854299999998      | -2.5634936000000001 | 4.4960975000000003  | H | 0.23667551E+01           | 0.10374159E+01      | 0.1053516E-01        |
| H | 0.2540668700000000       | -1.6717910000000000 | 4.8468001000000003  | H | 0.26371447E+00           | 0.13397798E+01      | 0.10193263E+01       |
| O | 0.93799025000000003      | -8.0301895999999999 | 3.4921579000000000  | H | 0.13347571E+01           | 0.12019791E+01      | -0.46881904E+00      |
| H | 1.3370834000000000       | -7.3976476000000000 | 2.8290611000000001  | H | -0.10316166E+01          | 0.23917225E+01      | -0.55137438E+00      |
| H | 1.6679107000000000       | -8.7486239000000001 | 3.5415763999999998  | H | 0.84948358E-01           | -0.11204087E+01     | -0.10019725E+01      |
| O | -1.5400840000000000      | -6.4641887000000002 | 2.6968709999999998  | H | -0.10312885E+01          | -0.52205130E+00     | 0.14853141E+01       |
| H | -1.3662780999999999      | -7.3765621000000001 | 3.0060292000000000  | O | 1.8736140999999999       | -5.8048264999999999 | 1.7202691999999999   |
| H | -2.5201788000000001      | -6.4759630000000001 | 2.9926154000000000  | H | 2.0047882000000001       | -5.1147860999999999 | 2.3813141999999998   |
|   |                          |                     |                     | H | 1.5402263000000000       | -5.2267030999999999 | 0.98293810000000004  |
| C | 0.15383664E+01           | -0.26431354E+01     | 0.25435197E+01      | O | -1.1210099000000000      | -5.2390977000000003 | 0.35306440000000000  |
| C | 0.18253982E+01           | -0.13091504E+01     | 0.30155248E+01      | H | -0.45041236000000001     | -4.5265649000000003 | 0.40973083999999999  |
| O | 0.15753079E+01           | -0.29937709E+00     | 0.20052917E+01      | H | -1.0317628999999999      | -5.6153493000000001 | 1.2777567999999999   |
| O | 0.13551075E+01           | -0.10444360E+01     | 0.73772322E+00      | O | -1.0719197000000000      | -4.3273690000000000 | 4.2732690000000000   |
| C | 0.14023812E+01           | -0.25458709E+01     | 0.11366968E+01      | H | -0.1643237900000000      | -4.2849119000000000 | 3.9739447000000001   |
| O | 0.20890824E+01           | -0.87572364E+00     | 0.41734165E+01      | H | -1.4157573999999999      | -5.0903299000000004 | 3.8496793999999999   |
| C | 0.79910181E-01           | -0.49338954E+00     | 0.63685521E-02      | O | 3.6529964000000001       | -5.4586147000000000 | 3.9578997000000000   |
| O | -0.10900298E+01          | -0.69663298E+00     | 0.78363701E+00      | H | 3.1103906000000001       | -4.6630013999999997 | 3.8984139000000000   |
| O | 1.2638663999999999       | -3.5368986000000001 | 0.28479732000000002 | H | 3.3762929000000002       | -5.9397985999999996 | 3.2066067000000000   |
| O | 1.4421590000000000       | -3.7654196999999998 | 3.3383967000000001  | C | 3.6285693000000001       | -4.0715903999999998 | -1.2623886000000000  |
| C | 0.27146061E+00           | 0.10070107E+01      | -0.20204517E+00     | H | 2.8782717000000000       | -4.3446537999999997 | -0.78326247000000004 |
| O | -0.85097717E+00          | 0.15323307E+01      | -0.95119444E+00     | H | 4.0718236000000001       | -3.4262687999999999 | -0.66383709000000002 |
| H | 0.22752098E+01           | -0.91552083E+00     | 0.89002999E-01      | O | -7.9359369999999999E-002 | -3.4948879000000002 | -2.0497744000000000  |
| H | 0.43151950E+00           | 0.13977922E+01      | 0.79483317E+00      | H | 2.8714673000000000E-002  | -4.2941899000000001 | -2.6520120000000000  |
| H | 0.12098571E+01           | 0.10947962E+01      | -0.81718706E+00     | H | 0.3655481800000000       | -3.7656809999999998 | -1.2035708000000001  |
| H | -0.10187253E+01          | 0.24472457E+01      | -0.67844671E+00     | O | -0.9096127699999996      | -1.3044730000000000 | 4.3835379999999997   |
| H | -0.44763091E-01          | -0.10270971E+01     | -0.94835357E+00     | H | -0.94131821000000004     | -2.2353437000000000 | 4.0887754999999997   |
| H | -0.91541744E+00          | -0.61502123E+00     | 0.17564737E+01      | H | 4.2680460000000003E-002  | -1.3166960000000001 | 4.6672406000000004   |
| O | 1.7510095000000001       | -5.9333741000000000 | 1.7096183000000000  | O | 4.2136903999999999       | -6.7672898999999997 | 1.0706895000000001   |
| H | 1.7376229000000001       | -5.1926777000000000 | 2.4053320000000000  | H | 4.1526787000000001       | -7.6235910000000002 | 0.61309305000000003  |
| H | 1.5682843000000000       | -5.2965777000000003 | 0.9398296699999995  | H | 3.3408809000000002       | -6.4890540999999997 | 0.9354495800000000   |
| O | -0.9504926200000001      | -5.1829917999999999 | 0.4005353500000001  | O | 1.7600739000000001       | -3.9603587999999998 | 6.2094950000000004   |
| H | -8.9816410999999999E-002 | -4.7140534000000001 | 0.5371522500000000  | H | 2.1887797000000000       | -4.8027397000000001 | 6.0471639000000001   |
| H | -1.1355427000000000      | -5.4357898000000002 | 1.3412762000000000  | H | 1.1797854000000001       | -3.8919489000000000 | 5.4554831000000004   |
| O | -0.9299197099999995      | -4.0245429000000001 | 4.4214257000000003  | O | 1.0636692999999999       | -8.0839797999999998 | 3.0457036000000000   |
| H | -0.1000543000000000      | -3.8367727999999999 | 3.9086682000000001  | H | 1.4924767999999999       | -7.3888817500000000 | 2.5168558999999999   |
| H | -1.3675358000000000      | -4.5993709000000003 | 3.7882609000000000  | H | 1.7076112999999999       | -8.8034683000000005 | 3.0438071999999998   |
| O | 3.7329257999999998       | -5.1124872999999997 | 4.0394205999999997  | O | -1.1219679000000000      | -6.5235298999999998 | 2.6687256000000001   |
| H | 3.0221868999999999       | -4.3948137999999997 | 4.0216691000000004  | H | -0.3259983999999999      | -7.1022150000000002 | 2.6396801000000001   |
| H | 3.2184211999999999       | -5.9146701999999998 | 3.8060280999999998  | H | -1.7870638000000001      | -7.1559344999999999 | 3.0986563000000000   |
| O | -6.2269247999999999E-002 | -3.7867931000000001 | -2.0910332000000000 | O | -2.9469959999999999      | -3.2594077000000001 | 0.82414027000000001  |
| H | -2.9154333000000001E-002 | -4.7520734999999998 | -2.2771336000000000 | H | -2.4334617999999999      | -3.9169006000000000 | 0.30073191999999999  |
| H | 0.45007093999999997      | -3.6851101000000002 | -1.2467714000000001 | H | -2.2933549000000002      | -2.5299073999999999 | 0.63563265999999996  |
| O | 3.8133021000000000       | -3.7379320000000000 | -1.5363635000000000 |   |                          |                     |                      |
| H | 3.0060099999999998       | -4.0078693000000003 | -1.0253414000000001 | C | 0.16538927E+01           | -0.26938123E+01     | 0.26080880E+01       |
| H | 4.3787817999999996       | -3.2771360000000000 | -0.8268974000000000 | C | 0.18239274E+01           | -0.13489238E+01     | 0.30164745E+01       |
| O | 1.6931229000000001       | -4.0196611999999998 | 6.1250643000000000  | O | 0.17096949E+01           | -0.46157986E+00     | 0.19835723E+01       |

|   |                         |                      |                         |   |                       |                      |                      |
|---|-------------------------|----------------------|-------------------------|---|-----------------------|----------------------|----------------------|
| C | 0.13338591E+01          | -0.12397239E+01      | 0.76681073E+00          | O | 3.6908333000000000    | -5.5074905999999997  | 3.7881098000000000   |
| C | 0.13301804E+01          | -0.27130987E+01      | 0.12408658E+01          | H | 2.9969260000000002    | -4.9084992999999999  | 3.5895201000000001   |
| C | 0.19841294E+01          | -0.93104698E+00      | 0.41739996E+01          | H | 3.1550265000000000    | -6.2419446000000001  | 3.9370459000000002   |
| C | 0.27245421E-01          | -0.71777274E+00      | 0.15564851E+00          | O | -0.7408263099999999   | -4.1212701000000003  | 4.2631747000000004   |
| O | -0.10654091E+01         | -0.98319844E+00      | 0.91317449E+00          | H | 0.19956845000000001   | -4.2168767999999996  | 4.0625140999999996   |
| O | 1.1120395000000001      | -3.7198300999999998  | 0.39023318000000001     | H | -1.0917003999999999   | -4.7248745000000003  | 3.5782728000000001   |
| O | 1.6229582000000000      | -3.72847798000000001 | 3.5186166999999999      | O | 3.9059815000000002    | -6.0202238000000001  | 0.43473516000000001  |
| C | 0.31841511E+00          | 0.78730522E+00       | -0.66135676E-02         | H | 3.3473975999999999    | -6.4448936999999997  | -0.19954479999999999 |
| O | -0.78889505E+00         | 0.14244591E+01       | -0.61044060E+00         | H | 3.2698711000000000    | -5.7606178999999997  | 1.0902225000000001   |
| H | 0.21720666E+01          | -0.11104968E+01      | 0.69145286E-01          | O | 3.4643176499999999    | -3.6045484000000001  | -1.3612932000000000  |
| H | 0.61420317E+00          | 0.12494916E+01       | 0.93822754E+00          | H | 2.5248020000000002    | -3.4494519000000001  | -0.92781807999999999 |
| H | 0.12791222E+01          | 0.85512891E+00       | -0.55711450E+00         | H | 3.9275788000000000    | -2.9182974000000002  | -0.82242430000000000 |
| H | -0.93555248E+00         | 0.22132671E+01       | -0.12172661E+00         | O | 1.9447696999999999    | -3.8967413000000000  | 6.3393465000000004   |
| H | -0.13028388E+00         | -0.12465223E+01      | -0.84785771E+00         | H | 2.4068372000000000    | -4.7114200999999998  | 6.0828739000000001   |
| H | -0.10353888E+01         | -0.57400269E+00      | 0.17792690E+01          | H | 1.7134841000000001    | -3.5258221999999999  | 5.4644002000000000   |
| O | 1.8995567000000000      | -5.7919565999999998  | 1.7589096000000000      | O | 0.37157666000000000   | -3.7213797999999998  | -2.2177422999999998  |
| H | 1.9224635000000001      | -5.0740778999999998  | 2.3966446000000001      | H | 0.36622238000000001   | -4.7544714000000004  | -2.2737044000000002  |
| H | 1.5408980000000001      | -5.2674896000000002  | 0.98681189999999996     | H | 0.34634615000000002   | -3.6539712000000000  | -1.2755854000000000  |
| O | -1.0836763000000000     | -4.2794862000000001  | 4.2585753900000000      | O | 4.8061233000000003    | -2.1445563000000002  | 0.55340849000000003  |
| H | -0.1486290800000000     | -4.0798151000000002  | 3.9660386999999999      | H | 5.1109210999999997    | -2.9465559999999999  | 0.98216535000000005  |
| H | -1.2789889999999999     | -5.0512800999999996  | 3.6797035000000000      | H | 5.3445689999999999    | -1.5135395000000000  | 1.0157754000000001   |
| O | 3.5851850999999999      | -5.6514176000000003  | 3.9032613999999999      | O | -1.1088846999999999   | -1.2644259000000000  | 4.4787140000000001   |
| H | 2.8243681999999999      | -5.1385053999999997  | 3.6224904000000002      | H | -1.0255451000000000   | -2.1901080999999998  | 4.3677761999999998   |
| H | 3.2918987000000000      | -6.4997074000000001  | 3.6041962999999999      | H | -0.23086603000000000  | -1.0261735000000001  | -0.129199000000002   |
| O | -1.3424805000000000     | -5.2336780999999997  | 0.3006156099999998      | O | 1.0635256000000000    | -8.3704912000000000  | 2.7697299000000002   |
| H | -0.52200528000000002    | -6.6556924999999998  | 0.34825326000000001     | H | 1.25758370000000001   | -7.56561214000000001 | 2.2928041000000001   |
| H | -1.2992718000000001     | -5.6271956000000003  | 1.2088926000000000      | H | 1.7947090999999999    | -8.9012141000000007  | 2.5388787000000002   |
| O | 3.5008918000000002      | -3.8287195000000001  | -1.3524744000000000     | O | 5.7497001000000001    | -4.6208280000000004  | 1.9782154999999999   |
| H | 2.8905468999999999      | -4.2373713999999998  | -0.73020978000000003    | H | 5.2646515000000003    | -5.1377917000000000  | 1.2727917000000000   |
| H | 4.0745247000000004      | -3.4174454000000001  | -0.7281265599999998     | H | 5.2422617999999996    | -4.8805780999999996  | 2.7581663000000001   |
| O | 0.14180553000000001     | -5.3200456000000000  | -2.0326792000000000     |   |                       |                      |                      |
| H | 7.0477162999999995E-002 | -4.4693465999999997  | -2.0526857999999999     | C | 0.14610383E+01        | -0.26553712E+01      | 0.26244650E+01       |
| H | 0.50983827000000004     | -3.3898100000000002  | -1.1173211999999999     | C | 0.15889860E+01        | -0.13016143E+01      | 0.31056854E+01       |
| O | 4.2648989999999998      | -6.5795171000000005  | 0.86969015000000005     | O | 0.15486521E+01        | -0.40122772E+00      | 0.20853242E+01       |
| H | 3.8623449000000001      | -7.1165735000000003  | 9.9596884999999996E-002 | C | 0.14374531E+01        | -0.11019323E+01      | 0.84285034E+00       |
| H | 3.4911641000000002      | -6.0242582999999996  | 1.0269752999999999      | C | 0.14223195E+01        | -0.25654978E+01      | 0.12507241E+01       |
| O | 0.83055972000000000     | -7.9718673999999998  | 2.9095515999999999      | O | 0.17091365E+01        | -0.83202738E+00      | 0.42404217E+01       |
| H | 1.1856633000000001      | -7.2080446000000000  | 2.4045302999999998      | C | 0.21237646E+00        | -0.49227209E+00      | 0.9778794E-01        |
| H | 1.5063157000000000      | -8.6412850999999993  | 2.6047094000000000      | O | -0.92626479E+00       | -0.65189569E+00      | 0.10103601E+01       |
| O | -0.99982705000000005    | -1.2790340000000000  | 4.0431312000000004      | O | 1.4948672000000001    | -3.4919593000000000  | 0.34601745000000000  |
| H | -1.1332409000000001     | -2.2632352000000000  | 3.9601454000000000      | O | 1.4199079999999999    | -3.7212466000000002  | 3.4527656000000002   |
| H | -0.14564224000000001    | -1.2445476000000000  | 4.4129512999999996      | C | 0.50933823E+00        | 0.96415845E+00       | -0.26753499E+00      |
| O | 1.8482611000000000      | -4.0317474999999998  | 6.5496758000000002      | O | -0.63409340E+01       | 0.1702883E+01        | -0.61852238E+00      |
| H | 2.4244378000000002      | -4.7335599999999998  | 6.2531768000000003      | H | 0.23402108E+01        | -0.98361316E+00      | 0.29868787E+00       |
| H | 1.4340605000000000      | -3.9638211999999999  | 5.6836228999999996      | H | 0.91330681E+00        | 0.14373662E+01       | 0.64525521E+00       |
| O | -1.4382438000000000     | -6.3670761999999996  | 2.7493813000000000      | O | 0.13168590E+01        | 0.10685968E+01       | -0.97365742E+00      |
| H | -6.4802152999999996     | -6.8921527999999999  | 2.8708630999999998      | H | -0.38757985E+00       | 0.26451123E+01       | -0.50896012E+00      |
| H | -2.0576699000000001     | -7.0098267999999999  | 3.1738062999999999      | H | 0.47485319E-01        | -0.12112228E+01      | -0.78767020E+00      |
| O | 4.9232873000000001      | -2.6082011000000001  | 0.45898373000000002     | H | -0.57599570E+00       | -0.30943253E+00      | 0.18532443E+01       |
| H | 5.1354255000000002      | -3.3260814999999999  | 1.0738637000000000      | O | 1.19083880000000001   | -5.9640488999999999  | 1.8344038000000000   |
| H | 5.2241030000000004      | -1.7820571999999999  | 0.9913659099999996      | H | 1.3617732000000000    | -5.3339242000000002  | 2.5520187000000001   |
|   |                         |                      |                         | H | 1.3594927999999999    | -5.4038662999999998  | 1.0783107000000001   |
| C | 0.16740883E+01          | -0.27412630E+01      | 0.27685966E+01          | O | -0.922272695000000005 | -4.8692565999999999  | 0.21218946000000000  |
| C | 0.17498577E+01          | -0.13782966E+01      | 0.31632061E+01          | H | -0.16628889999999999  | -4.3040741999999996  | 0.31702750000000002  |
| O | 0.16081440E+01          | -0.43889482E+00      | 0.21987974E+01          | H | -1.0462970000000000   | -5.2621623000000000  | 1.1219536999999999   |
| C | 0.14516949E+01          | -0.12058991E+01      | 0.92395379E+00          | O | -1.15013040000000001  | -3.9934273000000000  | 4.0996686000000002   |
| C | 0.14694952E+01          | -0.26463315E+01      | 0.13802597E+01          | H | -0.23912617999999999  | -3.8351187000000002  | 3.7681860999999999   |
| O | 0.18813220E+01          | -0.88918413E+00      | 0.43330184E+01          | H | -1.3359699000000000   | -4.8515176000000002  | 3.6423071000000000   |
| C | 0.24368099E+00          | -0.67794686E+00      | 0.18942350E+00          | O | 3.4674178000000002    | -5.5911670999999998  | 3.5490244999999998   |
| O | -0.91336767E+00         | -0.74036462E+00      | 0.10323557E+01          | H | 3.0164900000000001    | -4.7098111999999999  | 3.5694341000000001   |
| O | 1.3713291999999999      | -3.5612512000000001  | 0.4773242699999999      | H | 2.7556278000000001    | -6.1621645999999997  | 3.2508610000000000   |
| O | 1.7632867999999999      | -3.7828023000000002  | 3.5281991000000001      | O | 4.0458159000000000    | -6.1634808000000003  | 0.26404807000000002  |
| C | 0.59323465E+00          | 0.71243676E+00       | -0.25424156E+00         | H | 3.6024466999999998    | -6.7339567999999996  | -0.41203943999999998 |
| O | -0.59612531E+00         | 0.12504333E+01       | -0.85853381E+00         | H | 3.3378169000000000    | -5.5726336999999999  | 0.5924098000000003   |
| H | 0.23324397E+01          | -0.94423801E+00      | 0.31907882E+00          | O | 3.5532357000000001    | -3.9508728000000000  | -1.3121848000000000  |
| H | 0.83255911E+00          | 0.13226612E+01       | 0.60199411E+00          | H | 2.6861228000000001    | -3.6590945000000001  | -0.97141396999999996 |
| H | 0.14487721E+01          | 0.73349956E+00       | -0.91582569E+00         | H | 4.2043585999999999    | -3.5872060000000001  | -0.59801652000000005 |
| H | -0.54439557E+00         | 0.22132774E+01       | -0.76948857E+00         | O | 0.62490581000000001   | -3.5506327999999998  | -2.1971432000000002  |
| H | 0.10559428E+00          | -0.13001144E+01      | -0.72914561E+00         | H | 0.63024665000000002   | -4.5178818999999999  | -2.3410418000000002  |
| H | -0.56268224E+00         | -0.47630691E+00      | 0.19151931E+01          | H | 0.46845430999999998   | -3.5339391999999998  | -1.1402620000000001  |
| O | 1.5512927999999999      | -5.8616809999999999  | 1.8311706999999999      | O | 1.8433714000000001    | -3.8444909999999998  | 6.2303271999999996   |
| H | 1.6495200999999999      | -5.0646192000000001  | 2.3213892999999999      | H | 2.3868089000000001    | -4.6031744999999997  | 6.1529496000000004   |
| H | 1.2365116000000000      | -5.4535346000000002  | 0.97111723000000005     | H | 1.6133071000000001    | -3.7012130000000001  | 5.2693156999999999   |
| O | -0.88035348000000002    | -4.9638556999999999  | 0.25933728000000000     | O | 4.8180228999999999    | -2.1568361999999999  | 0.55787169999999997  |
| H | -0.10911619000000000    | -4.3933745999999996  | 0.4993501499999999      | H | 4.9834268000000002    | -2.9963685000000000  | 1.0606412000000001   |
| H | -0.91079268000000002    | -5.4980308000000004  | 1.1149585000000000      | H | 5.3361694000000002    | -1.5742946000000000  | 1.1997515999999999   |

|   |                      |                     |                         |   |                      |                     |                         |
|---|----------------------|---------------------|-------------------------|---|----------------------|---------------------|-------------------------|
| O | -1.6089424999999999  | -6.2579589999999996 | 2.5942096000000001      | O | -0.77729902E+00      | 0.18045519E+01      | -0.31852530E+00         |
| H | -0.7143789099999998  | -6.5256432999999996 | 2.4787918000000002      | H | 0.21752954E+01       | -0.91275822E+00     | 0.20688925E-01          |
| H | -1.8226528000000000  | -7.1266762000000003 | 3.0661432000000000      | H | 0.73294932E+00       | 0.14310873E+01      | 0.10408199E+01          |
| O | 5.4058982000000002   | -4.6187227000000002 | 2.0032906000000001      | H | 0.10661365E+01       | 0.11245754E+01      | -0.64353169E+00         |
| H | 5.0576654999999997   | -5.2318528999999998 | 1.3010596999999999      | H | -0.13011541E+01      | 0.20565865E+01      | 0.44078917E+00          |
| H | 4.7950426000000004   | -4.9623448000000003 | 2.7299834000000001      | O | -0.28403026E+00      | -0.11294447E+01     | -0.51645042E+00         |
| O | -1.2358042000000000  | -1.1075290000000000 | 4.3231592000000001      | H | -0.55525283E+00      | -0.59525020E+00     | 0.22864534E+01          |
| H | -1.2814175999999999  | -2.0760489000000000 | 4.4660848000000000      | O | 1.2696386000000000   | -5.8438651000000004 | 1.8213571000000000      |
| H | -0.3705139900000002  | -0.8852617400000002 | 4.6847371000000004      | H | 1.3807421000000000   | -4.9335022000000004 | 2.1727531000000000      |
| C | 0.12613630E+01       | -0.26039101E+01     | 0.26093650E+01          | H | 0.98504164000000005  | -5.5873660000000003 | 0.98051147000000005     |
| C | 0.17490404E+01       | -0.13097458E+01     | 0.30673537E+01          | O | -1.1626097000000000  | -4.2405438000000002 | 4.4366855000000003      |
| O | 0.17470223E+01       | -0.42329695E+00     | 0.20149058E+01          | H | -0.6886748000000000  | -4.2677611999999998 | 3.8731518999999999      |
| C | 0.13487315E+01       | -0.11251392E+01     | 0.79755902E+00          | H | -1.7096633999999999  | -4.8304713000000001 | 3.8985489000000002      |
| C | 0.11637263E+01       | -0.25844286E+01     | 0.12248818E+01          | O | -1.3516827000000000  | -4.9461592000000003 | -0.20255139999999999    |
| C | 0.21031040E+01       | -0.92990773E+00     | 0.42114791E+01          | H | -0.6886748000000003  | -4.3422460999999997 | 0.16816536000000001     |
| C | 0.46665523E-01       | -0.47926017E+00     | 0.29716970E+00          | H | -1.3888218000000001  | -5.4950862999999996 | 0.59917684999999998     |
| O | -0.98132425E+00      | -0.63709821E+00     | 0.12586721E+01          | O | 3.2247145000000002   | -5.6636053000000004 | 3.8748456000000001      |
| O | 1.0582471000000000   | -3.5348193999999999 | 0.3765886399999997      | H | 2.5471409000000000   | -4.9770352000000004 | 3.7640908999999998      |
| O | 1.2543339000000000   | -3.7210426000000001 | 3.3694378000000000      | H | 3.2116821000000000   | -6.2645001000000002 | 3.1700599999999999      |
| C | 0.35227559E+00       | 0.10407467E+01      | 0.18311533E+00          | O | 0.75475312999999999  | -3.5580438000000001 | -2.2167007000000001     |
| O | -0.59175006E+00      | 0.16141324E+01      | -0.77085616E+00         | H | 0.622115518000000003 | -4.4873045999999999 | -2.1707717999999998     |
| H | 0.21160111E+01       | -0.97472541E+00     | 0.11871260E+00          | H | 0.62670490000000001  | -3.3304260999999999 | -1.2732441000000001     |
| H | 0.14831475E+00       | 0.14262739E+01      | 0.11993734E+01          | O | 1.3482263999999999   | -3.7110012999999999 | 6.1681489000000003      |
| H | 0.13743515E+01       | 0.13001879E+01      | -0.19637937E+00         | H | 1.3238448000000000   | -4.6223656999999996 | 6.3527325000000001      |
| H | -0.50996814E+00      | 0.25350262E+01      | -0.58467725E+00         | H | 1.5632012000000000   | -3.6494959999999998 | 5.2352654999999997      |
| H | -0.15659124E+00      | -0.92118763E+00     | -0.69154447E+00         | O | -1.5217814000000001  | -6.2855477000000004 | 2.4694316000000001      |
| H | -0.65294249E+00      | -0.10999690E+01     | 0.20788618E+01          | H | -0.6163910400000000  | -6.5617938999999996 | 2.5113774000000002      |
| O | 1.3420433000000001   | -6.0945423000000002 | 1.6699413999999999      | H | -1.9607532000000001  | -7.0652188999999996 | 2.8845166000000000      |
| H | 1.4366882000000001   | -5.2077555000000002 | 2.1607726999999999      | O | 3.6014607000000001   | -3.5027367000000002 | -1.6726057999999999     |
| H | 1.2348832000000001   | -5.6259180999999998 | 0.8257454499999999      | H | 2.7808432000000001   | -3.4984784000000002 | -1.2432741000000000     |
| O | -1.3152756999999999  | -4.1025755000000004 | 4.0306837000000000      | H | 1.1981811000000002   | -3.0170802000000001 | -1.0481412000000001     |
| H | -0.3680821300000001  | -3.9735122000000000 | 3.7941775999999998      | O | -1.1916281000000000  | -1.3918592000000001 | 4.5378901999999997      |
| H | -1.5388035000000000  | -4.8553845999999998 | 3.4073327999999998      | H | -1.1541197000000001  | -2.3284541999999999 | 4.4921265999999997      |
| O | -1.3988588000000000  | -4.9463619000000003 | 3.5046829000000002E-002 | O | -0.27482273000000002 | -1.2083298000000000 | 4.8754803000000004      |
| H | -0.6477510800000003  | -4.4030848000000002 | 0.31129675000000001     | O | 3.8337520000000000   | -6.5788751999999997 | 0.6334546500000001      |
| H | -1.5491518000000000  | -5.5757510000000003 | 0.75732748000000005     | H | 3.7572505999999999   | -7.3032845000000002 | 1.8064212000000000E-002 |
| O | 3.1810174000000000   | -5.5670045999999997 | 3.9016251999999998      | H | 2.9134848000000000   | -6.4401035000000002 | 0.8341279000000003      |
| H | 2.6357689000000000   | -4.8096956999999998 | 3.7869785000000000      | O | -3.2490464000000001  | -2.5231283000000002 | 0.54527731999999995     |
| H | 2.7539136000000002   | -6.1967961000000003 | 3.3368424999999999      | H | -2.9130346999999999  | -3.4609182000000001 | 0.65014828000000002     |
| O | 3.5936012000000002   | -3.7899930999999999 | -1.2643958000000000     | H | -2.4115712999999999  | -2.0590820999999999 | 0.61199135999999999     |
| H | 2.8267850999999999   | -4.0220026000000004 | -0.71318404999999996    | O | 1.1779044000000001   | -8.2066499000000004 | 3.2489816999999999      |
| H | 4.2401922000000001   | -3.2619615000000000 | -0.6802802599999997     | H | 1.3321954000000000   | -7.4825825999999998 | 2.6507399000000000      |
| O | 0.38442051999999999  | -3.6340829000000001 | -2.2120185000000001     | H | 1.9663845000000000   | -8.7911145000000008 | 3.2143058000000000      |
| H | 0.59308548000000005  | -4.5124715999999996 | -2.4111231000000002     | C | 0.13886724E+01       | -0.27135741E+01     | 0.26316515E+01          |
| H | 0.67754433999999997  | -3.5719261000000002 | -1.2891383999999999     | C | 0.17366044E+01       | -0.13984677E+01     | 0.29761915E+01          |
| O | 1.7976174000000000   | -3.5079973000000000 | 6.1401263999999998      | O | 0.17301576E+01       | -0.49041809E+00     | 0.18939003E+01          |
| H | 1.9861131000000001   | -4.4719930999999997 | 6.0595740999999999      | C | 0.12189317E+01       | -0.12202131E+01     | 0.74371255E+00          |
| H | 1.5418056000000000   | -3.4260128000000001 | 5.1676146000000003      | C | 0.11765098E+01       | -0.26777111E+01     | 0.12239673E+01          |
| O | -1.4507848000000001  | -6.5233223999999996 | 0.3970837099999998      | O | -0.19693629E+01      | -0.90377187E+00     | 0.41154284E+01          |
| H | -0.50800065999999999 | -6.5727621999999997 | 2.6154394000000001      | C | -0.80770601E-01      | -0.50258982E+00     | 0.37566291E+00          |
| H | -1.7939309000000001  | -7.3135317000000004 | 2.8361980999999998      | O | -0.11008893E+01      | -0.83651480E+00     | 0.13744423E+01          |
| O | 4.0819013000000002   | -6.4864806000000002 | 8.5165570999999995E-002 | O | 1.0504073000000000   | -3.6728209999999999 | 0.35267190999999998     |
| H | 4.0950690999999999   | -7.4176871000000002 | -0.13346864999999999    | O | 1.3645569000000000   | -3.7467684000000001 | 3.4940842999999999      |
| H | 3.1419470000000000   | -6.3724246999999998 | 0.16047041000000001     | C | 0.70958078E-01       | 0.10175324E+01      | 0.26233139E+00          |
| O | 5.2180264999999997   | -4.9208436000000004 | 2.1521417000000000      | O | -0.95126391E+00      | 0.17760302E+01      | -0.35295327E+00         |
| H | 4.7130235999999996   | -5.4796116000000001 | 1.5348067999999999      | H | 0.19886651E+01       | -0.96992358E+00     | -0.17795624E-01         |
| H | 4.6157678999999998   | -4.9812564999999998 | 2.9777399999999998      | H | 0.27207656E+00       | 0.14477384E+01      | 0.12653637E+01          |
| O | -1.2640255000000000  | -1.2878485000000000 | 4.4102132999999997      | H | 0.91452322E+00       | 0.10847529E+01      | -0.53264256E+00         |
| H | -1.5458997999999999  | -2.1926657999999999 | 4.2694596000000002      | H | -0.14917814E+01      | 0.21263549E+01      | 0.38973022E+00          |
| O | -0.76985040000000005 | -1.5049716000000000 | 5.2126557000000000      | H | -0.41637769E+00      | -0.98327909E+00     | -0.56882684E+00         |
| O | 0.96361244000000001  | -8.2187620999999993 | 3.2732640000000002      | H | -0.63824457E+00      | -0.11660503E+01     | 0.21843428E+01          |
| H | 1.1165479000000000   | -7.4440445000000004 | 2.7149676999999999      | O | 1.3235979000000000   | -5.9766909000000004 | 2.0336048000000000      |
| H | 1.7580754000000001   | -8.7531788000000006 | 3.0608591000000001      | H | 1.2708756999999999   | -5.1579364999999999 | 2.5891663999999999      |
| C | 0.15197156E+01       | -0.26590324E+01     | 0.25955082E+01          | H | -5.0697379999999999  | -5.0697379999999999 | 1.2196397000000001      |
| C | 0.18771681E+01       | -0.13342367E+01     | 0.30128506E+01          | O | -1.5032626000000000  | -4.6441467000000003 | 0.37643258000000002     |
| O | 0.18560128E+01       | -0.38342602E+00     | 0.19252912E+01          | H | -0.5664280800000000  | -4.3511245000000001 | 0.29709723999999998     |
| C | 0.14268350E+01       | -0.11370708E+01     | 0.78516222E+00          | H | -1.5653125999999999  | -5.0925324999999999 | 1.2729547000000001      |
| C | 0.12504204E+01       | -0.25663672E+01     | 0.11947485E+01          | O | -1.1593789000000001  | -4.1560446000000004 | 4.4721102999999998      |
| O | 0.21015297E+01       | -0.80087398E+00     | 0.41743350E+01          | H | -0.1903182400000000  | -4.1728329999999997 | 4.3007261999999997      |
| C | 0.76780219E-01       | -0.52427338E+00     | 0.33302543E+00          | H | -1.5135677000000001  | -4.7358038000000002 | 3.8235364000000001      |
| O | -0.90943467E+00      | -0.71644022E+00     | 0.13956525E+01          | O | 3.4172699999999998   | -5.5342796999999998 | 4.1125325000000004      |
| O | 0.71335680999999995  | -3.3843974999999999 | 0.36800052000000000     | H | 2.6705893000000001   | -4.8777188999999996 | 4.0152039999999998      |
| O | 1.4078291000000001   | -3.6192793999999999 | 3.4206048000000000      | H | 3.0580318000000002   | -6.0891766000000001 | 3.4208542999999998      |
| C | 0.27988078E+00       | 0.10016131E+01      | 0.11024099E+00          | O | -1.5877545000000000  | -6.0905335000000003 | 2.7547465000000000      |
|   |                      |                     |                         | H | -0.6976835399999999  | -6.2631673000000001 | 2.4114545999999999      |

|   |                         |                     |                         |   |                      |                     |                      |
|---|-------------------------|---------------------|-------------------------|---|----------------------|---------------------|----------------------|
| H | -1.9759407000000000     | -6.9287368999999996 | 2.9367383999999999      | H | 1.9569302000000000   | -8.8994312000000004 | 2.8627292999999998   |
| O | 0.64482952000000004     | -3.5023721000000001 | -2.3131718999999999     |   |                      |                     |                      |
| O | 0.39458965000000001     | -4.4256456000000002 | -2.3516571000000002     | C | 0.16666564E+01       | -0.26513497E+01     | 0.27121938E+01       |
| H | 0.92582907000000003     | -3.3763725999999998 | -1.3658600000000001     | O | 0.17749742E+01       | -0.13376307E+01     | 0.31531883E+01       |
| O | 1.5330245000000000      | -3.7409783000000001 | 6.1955666999999996      | C | 0.18762317E+01       | -0.43988274E+00     | 0.20862885E+01       |
| H | 1.1680904000000001      | -4.6507573999999998 | 6.2148059000000000      | C | 0.16742683E+01       | -0.11513200E+01     | 0.83581494E+00       |
| H | 1.3346979000000001      | -3.5094767000000000 | 5.2521328000000000      | C | 0.15734573E+01       | -0.26067304E+01     | 0.12813091E+01       |
| O | 3.9253342999999998      | -3.8523204000000000 | -1.5601209000000000     | O | 0.17874210E+01       | -0.92733780E+00     | 0.43401813E+01       |
| H | 3.1902689999999998      | -3.6736276000000001 | -0.9983205600000002     | C | 0.32944260E+00       | -0.61559478E+00     | 0.20575346E+00       |
| H | 4.5955092999999998      | -3.2863367000000001 | -1.1321471999999999     | O | -0.76903099E+00      | -0.95713592E+00     | 0.11186037E+01       |
| O | -0.96089928000000002    | -1.2999738999999999 | 4.5794493000000003      | O | 1.3430440000000001   | -3.6193548000000000 | 0.50724234000000001  |
| H | -1.0666043000000001     | -2.2860117000000000 | 4.6164345999999998      | O | 1.3918159000000001   | -3.7139723999999998 | 3.4878567999999999   |
| H | 3.5281541999999999E-002 | -1.3435261999999999 | 4.8381543999999996      | C | 0.40587155E+00       | 0.85844793E+00      | 0.29293021E-01       |
| O | 4.2315166000000000      | -6.2819906999999997 | 0.1043289200000001      | O | -0.94134679E+00      | 0.14191742E+01      | -0.37750676E+00      |
| H | 3.8746349000000002      | -7.1468930999999998 | 0.1972181899999999      | H | 0.25408874E+01       | -0.10722191E+01     | 0.21512708E+00       |
| C | 3.6088472999999999      | -5.7095371999999998 | -0.30983685000000000    | O | 0.70831370E+00       | 0.14110067E+01      | 0.98776225E+00       |
| O | 4.9410594999999997      | -2.0971848999999998 | 0.6076995100000000      | H | 0.10493699E+01       | -0.11034120E+01     | -0.77464864E+00      |
| H | 4.9094065000000002      | -2.8440078999999998 | 1.2343805999999999      | H | -0.14278317E+01      | 0.15987537E+01      | 0.44783489E+00       |
| H | 5.3954101000000003      | -1.3765509000000000 | 1.1755644000000001      | O | 0.22811986E+00       | -0.11895843E+01     | -0.75572555E+00      |
| O | 5.1324715999999997      | -4.4657463000000002 | 1.9442086999999999      | H | -0.38110445E+00      | -0.15697274E+01     | 0.17683542E+01       |
| H | 4.7723640000000004      | -5.1732468000000003 | 1.3765764000000000      | O | 1.5549459999999999   | -6.0222651000000003 | 1.8789496000000001   |
| H | 4.9009362999999997      | -4.7965062999999996 | 2.8060270999999998      | H | 1.1017425999999999   | -5.3587967000000000 | 2.4387967000000002   |
|   |                         |                     |                         | H | 1.8662685999999999   | -5.3935849999999999 | 1.2737961000000000   |
| C | 0.12018723E+01          | -0.27028177E+01     | 0.27700512E+01          | O | -1.3294888000000000  | -4.4545192000000000 | 0.6741169599999999   |
| C | 0.15340874E+01          | -0.13229461E+01     | 0.31183645E+01          | H | -0.35603750000000001 | -4.1761528999999999 | 0.6472142499999999   |
| O | 0.16035483E+01          | -0.45706122E+00     | 0.20256751E+01          | H | -1.30493520000000001 | -5.3144453000000000 | 1.0730010000000001   |
| C | 0.13588297E+01          | -0.1222267E+01      | 0.85286540E+00          | O | -1.2514611000000000  | -4.3265345000000002 | 4.4296167999999998   |
| O | 0.12637269E+01          | -0.26861965E+01     | 0.13621016E+01          | H | -0.39155266000000000 | -3.9908937999999998 | 4.0798411000000003   |
| C | 0.17330945E+01          | -0.86868883E+00     | 0.42531601E+01          | H | -1.3975611999999999  | -5.0756769999999998 | 3.7907593999999998   |
| C | 0.30604097E-01          | -0.67212110E+00     | 0.22188273E+00          | O | 3.4735073999999999   | -5.5477483000000003 | 3.7475298000000001   |
| O | -0.10689745E+01         | -0.86824529E+00     | 0.11278156E+01          | H | 2.8566951000000000   | -4.8632476000000002 | 4.0294160999999997   |
| O | 1.2206527000000000      | -3.6246784000000001 | 0.5280732799999998      | H | 2.9737182999999998   | -5.8578424000000000 | 2.9920008999999999   |
| O | 1.3763631000000001      | -3.7133908000000000 | 3.6171069000000000      | O | 1.6810052000000000   | -4.1899329999999999 | 6.1755250000000004   |
| O | 0.21651305E+00          | 0.87085077E+00      | 0.15263591E-01          | H | 1.2060268999999999   | -4.9804566000000001 | 6.2799218000000003   |
| O | -0.10352825E+01         | 0.15169299E+01      | -0.15094866E+00         | H | 1.6429147000000000   | -4.0041190999999996 | 5.1842354000000004   |
| H | 0.22309361E+01          | -0.10851866E+01     | 0.14627787E+00          | O | 3.7797485000000002   | -3.4014353000000002 | -1.0969807000000000  |
| O | 0.63876142E+00          | 0.12447986E+01      | 0.95968018E+00          | H | 2.9169925999999999   | -3.6405297999999999 | -0.8592033199999999  |
| H | 0.88431849E+00          | 0.10755563E+01      | -0.79388348E+00         | H | 4.22439430000000002  | -3.1038274000000001 | -0.2645434999999999  |
| H | -0.14642394E+01         | 0.14012463E+01      | 0.72563717E+00          | O | 0.72178096999999997  | -3.4840216000000002 | -2.3313942000000001  |
| H | -0.12997316E+00         | -0.11772881E+01     | -0.79835813E+00         | H | 0.69977305000000001  | -4.4038775000000001 | -2.6094390999999999  |
| H | -0.68154855E+00         | -0.12429298E+01     | -0.19221258E+01         | H | 0.76570855000000004  | -3.4737930000000001 | -1.3331987000000001  |
| O | 1.3198251999999999      | -6.0366647999999996 | 2.1044972999999998      | O | -1.2212193000000000  | -1.5942016999999999 | 4.2755247000000001   |
| H | 1.3272594000000000      | -5.2276682000000001 | 2.7099820999999999      | H | -1.4921331000000000  | -2.5617683000000002 | 4.3418128999999999   |
| H | 1.4615578000000000      | -5.4725276999999997 | 1.2999118000000001      | H | -0.29097239000000003 | -1.6384946000000000 | 4.4127150999999998   |
| O | -1.4987136000000001     | -4.2780239000000000 | 0.59372979000000004     | O | 2.0714128000000001   | -6.4814388000000003 | -1.0115759000000000  |
| H | -0.49788947000000000    | -3.4246055999999997 | 0.6452652099999999      | H | 1.8260400000000001   | -7.4532634999999999 | -0.9324124499999995  |
| O | -1.7742359000000001     | -5.0573980000000001 | 1.1044573999999999      | H | 1.2316494000000000   | -6.1210418999999998 | -0.68071102000000006 |
| O | -1.2387576000000000     | -4.1309448000000000 | 4.2902522999999997      | O | 5.4888678999999998   | -4.5299686000000001 | 2.4443454999999998   |
| H | -0.36685181000000000    | -3.8192170000000001 | 3.9801375000000001      | H | 5.7581464000000002   | -5.2435425000000002 | 1.8233055000000000   |
| H | -1.3072078000000000     | -4.9004181000000004 | 3.7043862999999999      | H | 4.8108127999999999   | -4.9787413000000000 | 1.0812625000000001   |
| O | 3.4975070000000001      | -5.4266323999999999 | 3.8454996000000001      | O | 1.1348868000000001   | -8.2740687000000008 | 3.2363547000000001   |
| H | 2.9833319000000000      | -6.4340880999999996 | 3.9542630000000001      | H | 1.3634721999999999   | -7.5206460999999996 | 2.6037121000000001   |
| H | 2.9262288999999999      | -5.9469430000000001 | 3.2680655999999999      | H | 1.9917507000000001   | -8.7535878000000000 | 3.3907661000000000   |
| O | 3.7184746999999998      | -3.8943550999999998 | -1.0326118000000000     | O | -1.1520714999999999  | -6.6124415000000001 | 2.7367273999999999   |
| H | 2.7755478999999998      | -3.8836032000000000 | -0.7090940999999995     | H | -0.34054705000000002 | -7.1399596000000001 | 2.9201310000000000   |
| H | 4.0901947999999999      | -3.1750633000000001 | -0.5349104799999997     | H | -1.8185121000000000  | -7.1747155999999999 | 3.2042242000000001   |
| O | 0.99395120000000003     | -3.3407510000000000 | -2.3260602000000001     |   |                      |                     |                      |
| H | 0.59481119999999998     | -4.1442509999999997 | -2.7763575000000000     | C | 0.15110328E+01       | -0.27867062E+01     | 0.24547457E+01       |
| H | 1.0063248000000000      | -3.4973898000000001 | -1.3325231000000000     | O | 0.18417033E+01       | -0.14646509E+01     | 0.29235541E+01       |
| O | 0.14141741000000001     | -3.9723785999999999 | 6.4776233999999997      | C | 0.19512783E+01       | -0.55279290E+00     | 0.19417986E+01       |
| H | 1.1163673000000001      | -4.8862668999999999 | 6.6557418999999998      | C | 0.16548828E+01       | -0.12277634E+01     | 0.69276432E+00       |
| H | 1.2834166000000000      | -3.9566948000000002 | 5.4982479000000000      | C | 0.16195127E+01       | -0.26909196E+01     | 0.10488402E+01       |
| O | -1.3589792000000001     | -1.5185980000000001 | 4.1286582000000003      | O | 0.20638210E+01       | -0.11283635E+01     | 0.41111476E+01       |
| H | -1.4228626000000000     | -2.4812090000000002 | 4.0781055999999998      | C | 0.29298854E+00       | -0.82817301E+00     | 0.12316357E+00       |
| H | -0.52636897000000005    | -1.4824406000000001 | 4.5909928999999998      | O | -0.80241325E+00      | -0.96179254E+00     | 0.10157471E+01       |
| O | 4.1927975999999996      | -6.2483646999999998 | 0.4417571499999999      | O | 1.4738083000000000   | -3.6833179000000000 | 0.23357668000000001  |
| H | 3.5537603999999998      | -7.0235890999999997 | 0.53444773000000001     | O | 1.3956195000000000   | -3.8396756000000001 | 3.1649756999999998   |
| H | 3.6218156000000001      | -5.5652381000000002 | 2.5393730999999999E-002 | C | 0.32179459E+00       | 0.65112765E+00      | -0.28589350E+00      |
| O | -1.5213563999999999     | -6.4671605999999997 | 2.5504768000000002      | O | -0.10383282E+01      | 0.11472787E+01      | -0.48367240E+00      |
| H | -0.63504415999999997    | -6.7752496999999998 | 2.4210802000000000      | H | 0.24163794E+01       | -0.94110463E+00     | -0.11429844E+00      |
| H | -1.8747562000000000     | -7.1635232999999996 | 3.1660634999999999      | H | 0.80176340E+00       | 0.12252238E+01      | 0.50684327E+00       |
| O | 5.4542707999999998      | -4.3944539999999996 | 2.3160687000000002      | H | 0.84197937E+00       | 0.81105124E+00      | -0.12098770E+01      |
| H | 5.4470251000000003      | -5.0146446999999998 | 1.5579608000000000      | H | -0.13970939E+01      | 0.12314605E+01      | 0.37237569E+00       |
| H | 4.7702011999999998      | -4.8464084999999999 | 2.8699810000000001      | H | 0.17329360E+00       | -0.15031571E+01     | -0.73126090E+00      |
| O | 1.0556057000000001      | -8.5114435999999999 | 3.0608200999999999      | H | -0.66701595E+00      | -0.17285266E+01     | 0.15805069E+01       |
| H | 1.1550252000000001      | -7.5570325000000000 | 2.8968162999999998      | O | 1.4074534999999999   | -6.1129270000000000 | 1.5838649000000000   |

|   |                          |                     |                         |   |                          |                      |                     |
|---|--------------------------|---------------------|-------------------------|---|--------------------------|----------------------|---------------------|
| H | 1.4673989000000001       | -5.2064589000000003 | 1.9659076000000000      | H | 1.6214449000000000       | -5.1321988000000003  | 6.3834125999999998  |
| H | 1.5196722000000000       | -5.9741280999999997 | 0.6766103300000004      | H | 1.8081921000000001       | -3.9280309999999998  | 5.3153252000000002  |
| O | -1.3279491999999999      | -4.6362224999999997 | 0.5201207300000003      | O | 1.1674344999999999       | -8.2262345300000002  | 3.2176265000000002  |
| H | -0.5334809299999999      | -4.1568252000000001 | 0.2070125900000000      | H | 1.3071062000000000       | -7.4206424999999996  | 2.7152788999999999  |
| H | -0.9916147899999997      | -5.0465358000000000 | 1.3821243999999999      | H | 1.9794230000000000       | -8.7441896999999997  | 3.0499348999999998  |
| O | 3.4435207000000001       | -5.6482011999999999 | 3.6427577000000002      | O | -2.9453035999999999      | -2.0276839999999998  | 0.3600449399999998  |
| H | 2.8665246000000000       | -4.8227028000000001 | 3.6429643000000000      | H | -2.3423720000000000      | -2.8452500000000001  | 0.2685483200000001  |
| H | 2.9469348000000002       | -6.1178347999999998 | 2.9616022000000002      | H | -2.2581422999999998      | -1.3257886000000001  | 0.6067612700000002  |
| O | -1.3247201100000000      | -4.1739256999999998 | 3.9376348999999999      | O | 4.2149729999999996       | -6.9348972000000000  | 0.9572736400000004  |
| H | -0.3727982799999998      | -4.0496004000000001 | 3.7205317999999998      | H | 4.2039444000000001       | -7.7919755999999998  | 1.3749243000000000  |
| H | -1.6046537999999999      | -5.0596331000000001 | 3.5980297999999999      | H | 3.4965041000000001       | -7.0763919000000000  | 0.1914643100000000  |
| O | 3.8950019000000000       | -3.2597824000000002 | -1.2348661999999999     | O | 5.8057964000000002       | -4.7640361999999996  | 2.4278179999999998  |
| H | 2.9992835000000002       | -3.4165359999999999 | -0.8594811000000000     | H | 5.5790496000000003       | -5.4480208000000001  | 1.7634344000000000  |
| H | 4.3547970999999999       | -2.8674909999999998 | -0.4718869399999998     | H | 5.0760788000000003       | -5.0756714000000001  | 3.0871368000000001  |
| O | 0.7906703899999999       | -3.2981934000000002 | -2.5357710000000000     | C | 0.17806139E+01           | -0.28677533E+01      | 0.24763352E+01      |
| H | 1.0567375000000001       | -4.1077896999999997 | -3.0175079000000000     | C | 0.20075049E+01           | -0.15147588E+01      | 0.28999208E+01      |
| H | 0.8658826299999999       | -3.6217088999999998 | -1.6159185000000000     | O | 0.21319307E+01           | -0.64986462E+00      | 0.18076622E+01      |
| O | 1.2347002000000000       | -3.9949808000000001 | 6.2158796000000001      | C | 0.16721675E+01           | -0.13516335E+01      | 0.66914787E+00      |
| H | 0.8460383999999997       | -4.8312207999999996 | 6.2704715000000002      | C | 0.16779187E+01           | -0.28118621E+01      | 0.10765811E+01      |
| H | 1.3569624000000000       | -3.8981636000000002 | 5.2352055999999996      | C | 0.21803123E+01           | -0.97447249E+00      | 0.39838617E+01      |
| O | 4.3454753999999998       | -6.4108377000000001 | 0.9459219700000000      | C | 0.34833733E+00           | -0.71684165E+00      | 0.25343416E+00      |
| H | 4.2004511999999998       | -7.3162121999999998 | 1.1444794000000000      | O | -0.56965177E+00          | -0.81947355E+00      | 0.13288251E+01      |
| H | 3.6215155000000001       | -6.2838015000000000 | 0.2609131599999998      | O | 3.3913221000000000       | -3.7379489999999999  | 0.23502991000000001 |
| O | 1.3035862000000000       | -8.2088322999999992 | 3.2822648999999996      | O | 1.6131603000000001       | -3.9048449999999999  | 3.3602097000000000  |
| H | 1.3571504000000001       | -7.2996933999999998 | 2.8124055000000001      | C | 0.53198310E+00           | 0.73862440E+00       | -0.11462869E+00     |
| H | 2.1723878999999999       | -8.6221285000000005 | 3.1739766999999999      | O | -0.70046386E+00          | 0.13355783E+01       | -0.61631342E+00     |
| O | -0.9239463000000000      | -1.5055649000000000 | 4.2440195999999997      | H | 0.23746991E+01           | -0.12182113E+01      | -0.14655920E+00     |
| H | -1.1488486000000000      | -2.4497933000000001 | 4.1388655999999999      | H | 0.96229948E+00           | 0.13683868E+01       | 0.73472399E+00      |
| H | -1.1211000000000000E-002 | -1.5275557000000000 | 4.4822407999999996      | H | 0.12154028E+01           | 0.73269045E+00       | -0.97798018E+00     |
| O | 5.8098856000000003       | -4.5090785000000002 | 2.5607997000000000      | H | -0.95004375E+00          | 0.20503918E+01       | -0.71943082E-01     |
| H | 5.3574913999999998       | -5.0327925999999996 | 1.8331229900000000      | H | -0.25877840E-01          | -0.12343552E+01      | -0.66588084E+00     |
| H | 5.4760162000000001       | -4.9609293000000001 | 3.3777257999999999      | H | -0.43565089E+00          | -0.16162233E+01      | 0.18684971E+01      |
| O | 3.4562206000000000       | -2.3932992000000000 | 6.2041776999999998      | O | 1.5583290000000001       | -6.1126989999999996  | 1.7456198999999999  |
| H | 2.8321934999999998       | -2.1687077000000001 | 5.5011013000000002      | H | 1.2457898999999999       | -5.5355699999999999  | 2.4413507000000001  |
| H | 3.1169923000000002       | -3.2186381000000002 | 6.6219796999999998      | H | 1.6154520000000001       | -5.5382645999999998  | 0.9446007899999997  |
| C | 0.14902415E+01           | -0.28378975E+01     | 0.24159925E+01          | O | -1.1677512999999999      | -4.2222899999999996  | 0.8094797799999998  |
| C | 0.19724024E+01           | -0.15791860E+01     | 0.28114461E+01          | H | -0.33128559000000002     | -4.23722097000000004 | 0.3614884999999999  |
| O | 0.21284825E+01           | -0.65897977E+00     | 0.17517874E+01          | H | -1.0966908000000000      | -4.9974093000000002  | 1.3832622999999999  |
| C | 0.16431497E+01           | -0.13745512E+01     | 0.59427060E+00          | O | 3.7151162000000002       | -5.4950340999999998  | 3.5206423000000000  |
| C | 0.15278735E+01           | -0.28219614E+01     | 0.99894820E+00          | H | 3.0033004000000001       | -4.8027031999999998  | 3.4799147000000001  |
| O | 0.20922067E+01           | -0.11768886E+01     | 0.39914516E+01          | H | 3.2282924999999998       | -6.1965235999999999  | 2.9960567000000000  |
| C | 0.29010940E+00           | -0.84882254E+00     | 0.12633735E+01          | O | -1.0328997000000000      | -4.4174220000000002  | 4.0074348000000004  |
| O | -0.71311275E+00          | -0.95174405E+00     | 0.11234660E+01          | H | -0.2220991400000000      | -4.1347287000000001  | 3.5493302999999998  |
| O | 1.3499378000000000       | -3.6915836999999998 | 7.9115268000000002E-002 | H | -1.2150988000000000      | -5.1533104999999999  | 3.4884805999999999  |
| O | 1.4018257999999999       | -3.8932541000000001 | 3.2175669999999998      | O | 3.9390703000000000       | -3.4266261999999998  | -1.2358864000000001 |
| C | 0.48894645E+00           | 0.64257892E+00      | -0.50107948E-01         | C | 3.1877922999999999       | -3.4990250999999999  | -0.5930997000000003 |
| O | -0.71481535E+00          | 0.12048877E+01      | -0.60175127E+00         | H | 4.5348344000000003       | -2.8585202000000001  | -0.7541815299999999 |
| H | 0.23592309E+01           | -0.11765464E+01     | -0.20339491E+00         | O | 0.88396375000000005      | -3.1574639000000002  | -2.4751280000000002 |
| H | 0.78245644E+00           | 0.10390014E+01      | 0.92395794E+00          | H | 0.8907439999999998       | -4.0459734999999997  | -2.8358945000000002 |
| H | 0.13663404E+01           | 0.86885839E+00      | -0.69547553E+00         | H | 1.0413144999999999       | -3.3805380000000000  | -1.5368037000000001 |
| H | -0.94509103E+00          | 0.18944518E+01      | 0.35598234E-01          | O | 1.6253084000000000       | -3.9081362999999998  | 6.2695505999999996  |
| H | 0.33180623E-01           | -0.13590130E+01     | -0.82281986E+00         | H | 1.2700157999999999       | -4.7917075000000002  | 6.3929942000000004  |
| H | -0.57225183E+00          | -0.17870265E+01     | 0.16401117E+01          | H | 1.5073114000000001       | -3.8224885999999998  | 5.2559174999999998  |
| O | 1.2910385000000000       | -6.1932710000000002 | 1.6537135000000001      | O | 4.4457646999999998       | -6.8973030000000000  | 0.6109819300000001  |
| H | 1.2745329999999999       | -5.2066067400000002 | 1.8653470999999999      | H | 4.3648766999999999       | -7.8337272999999996  | 0.6217647299999999  |
| H | 1.3508138000000001       | -6.1574656000000001 | 0.7315451499999998      | H | 3.5690390999999999       | -6.6582200000000000  | 0.3043937299999997  |
| O | -1.3611508000000001      | -4.3765844999999999 | 0.38029759000000002     | O | 5.7987140000000004       | -4.6940599000000001  | 2.1168493000000002  |
| H | -0.3857998899999998      | -4.2784304000000004 | 0.26235689000000001     | H | 5.5772880999999996       | -5.3542161000000004  | 1.3718773000000000  |
| H | -1.5527016000000000      | -5.0766719000000000 | 1.0566153000000000      | H | 5.0818485999999998       | -4.9108688000000003  | 2.7354609000000001  |
| O | -1.1200057999999999      | -4.4743696000000002 | 3.8605706000000000      | O | 1.2590444999999999       | -8.5098936999999992  | 3.1524692999999999  |
| H | -0.1689038300000000      | -4.4879683999999997 | 3.5336560000000001      | H | 1.3537459000000001       | -7.8593726999999998  | 2.4396106000000000  |
| H | -1.4617321000000001      | -5.1576440999999997 | 3.2422304999999998      | H | 2.1909201999999999       | -8.7927292999999995  | 3.2816041000000000  |
| O | 3.5508261999999999       | -5.5590586000000002 | 3.5460813000000000      | O | -1.0141658000000000      | -1.5141697000000001  | 4.7375730999999996  |
| H | 2.9996548000000001       | -4.7863914000000003 | 3.4239149000000002      | H | -1.0892137000000000      | -2.4577379000000001  | 4.6703153999999998  |
| H | 3.3240392999999999       | -5.9980117000000002 | 2.7212318000000000      | H | -7.6297572999999994E-002 | -1.4504246000000001  | 4.9971594000000001  |
| O | 4.0131138000000002       | -3.4258228000000002 | -1.3421863999999999     | O | -1.4353248999999999      | -6.7068830999999998  | 2.4130668000000002  |
| H | 3.1440378000000000       | -3.6048060999999998 | -0.8189414299999997     | H | -1.1646152999999999      | -7.2643468999999996  | 1.7008198000000001  |
| H | 4.5195676000000002       | -2.9388803000000001 | -0.6334649399999998     | H | -1.7616107999999999      | -7.3578333000000002  | 3.0955482999999999  |
| O | 0.89303105000000005      | -3.4039402999999999 | -2.5772780000000002     | C | 0.17499041E+01           | -0.28835518E+01      | 0.25968427E+01      |
| H | 0.9174631699999999       | -4.3679534999999996 | -2.7387489000000000     | C | 0.19026990E+01           | -0.15157045E+01      | 0.31019972E+01      |
| H | 1.1288175000000000       | -3.4194054000000000 | -1.6024548000000001     | O | 0.19587997E+01           | -0.56899690E+00      | 0.20897162E+01      |
| O | -1.1004973000000000      | -1.6572150999999999 | 4.3146806000000000      | C | 0.16807555E+01           | -0.13615854E+01      | 0.78875384E+00      |
| H | -1.3903269000000000      | -2.6186596000000000 | 4.2849570999999997      | C | 0.17613150E+01           | -0.27843432E+01      | 0.11862112E+01      |
| H | -0.1188572400000000      | -1.8192058000000000 | 4.3678150000000002      | O | 0.19369178E+01           | -0.10901610E+01      | 0.42853442E+01      |
| O | 1.7162621000000000       | -4.1856229999999996 | 6.2764157000000003      |   |                          |                      |                     |

|                         |                          |                     |                      |   |                          |                     |                          |
|-------------------------|--------------------------|---------------------|----------------------|---|--------------------------|---------------------|--------------------------|
| C                       | 0.35256232E+00           | -0.87414734E+00     | 0.21726297E+00       | O | -0.92348584000000000     | -4.4349059999999998 | 4.1861284999999997       |
| O                       | -0.59840770E+00          | -0.88481182E+00     | 0.12813742E+01       | H | -2.3760284999999999E-002 | -4.3179430999999999 | 3.7678856999999999       |
| O                       | 1.5281545999999999       | -3.6908960000000000 | 0.30773630000000002  | H | -1.3074977999999999      | -5.1660057999999998 | 3.6900667000000000       |
| O                       | 1.5979345000000000       | -3.9578924999999998 | 3.3127143000000001   | O | 3.7889438000000002       | -3.9092600000000002 | -1.3672461000000000      |
| C                       | 0.54682435E+00           | 0.55901242E+00      | -0.29117606E+00      | H | 3.0156849999999999       | -4.0536707999999999 | -0.82382849900000002     |
| O                       | -0.79881918E+00          | 0.11404188E+01      | -0.57202345E+00      | H | 4.1921732000000000       | -3.1511868000000001 | -0.84893258000000005     |
| H                       | 0.25102915E+01           | -0.10507453E+01     | 0.12908948E+00       | O | 0.62525222999999996      | -3.2291365000000001 | -2.2000538000000001      |
| H                       | 0.94399168E+00           | 0.11687869E+01      | 0.47576759E+00       | H | 0.98193368000000003      | -4.0669408999999996 | -2.5587149000000000      |
| H                       | 0.12074402E+01           | 0.58878903E+00      | -0.12286408E+01      | H | 0.79195543999999995      | -3.2873720000000000 | -1.2208741000000001      |
| H                       | -0.10141069E+01          | 0.68231834E+01      | 0.82892096E-01       | O | 1.6227475000000000       | -4.0866882000000000 | 6.3678704000000002       |
| H                       | -0.77699708E+01          | -0.15223936E+01     | -0.55518721E+00      | H | 2.2133997000000001       | -4.8433124000000003 | 6.4506530000000000       |
| H                       | -0.37520028E+00          | -0.16554678E+01     | 0.18824124E+01       | H | 1.4763953999999999       | -4.0034809999999998 | 5.3484540000000003       |
| O                       | 1.2928002999999999       | -6.1214743000000000 | 1.6552572000000001   | O | 5.8147789000000003       | -4.7489170999999999 | 2.1211232000000000       |
| H                       | 1.3496638000000001       | -5.4125135999999996 | 2.3299775999999999   | H | 5.6368638000000004       | -5.2903668000000001 | 1.3455804000000000       |
| H                       | 1.5414089000000000       | -5.6000871999999999 | 0.81727901000000003  | H | 5.0561487999999999       | -4.9507108000000004 | 2.6539804999999999       |
| O                       | -1.1838256000000000      | -4.1819965999999997 | 0.68833074000000005  | O | -1.5514332000000000      | -6.2957112999999998 | 2.1233765000000000       |
| H                       | -0.2388758699999999      | -4.0025789000000004 | 0.73759085999999996  | H | -0.7385925899999999      | -6.6889593999999999 | 1.8259296000000000       |
| H                       | -1.2973110000000001      | -4.8215189000000001 | 1.4195142999999999   | H | -1.8334569000000001      | -6.9807030999999999 | 2.7404177000000001       |
| O                       | 3.4819140999999998       | -5.8754356000000003 | 3.5410355999999998   | O | 5.3286255999999996       | -2.2912908000000001 | 0.54308840999999997      |
| H                       | 2.7241038999999998       | -5.1826141000000003 | 3.5130669000000001   | H | 5.3839180999999998       | -3.1207006000000002 | 1.0582026000000000       |
| H                       | 3.2349019000000001       | -6.1649696000000000 | 2.6090950000000000   | H | 5.8045910999999997       | -1.6183839000000000 | 1.1110454000000001       |
| O                       | -0.8629450100000001      | -4.5404021999999999 | 4.2204984999999997   | O | 4.3835968000000003       | -6.8010897999999997 | 0.55119313000000003      |
| 9.7069226999999994E-002 |                          | -4.5276114999999999 | 4.0783680000000002   | H | 4.4246240999999999       | -7.7286112999999999 | 0.39301593000000001      |
| H                       | -1.3428097000000001      | -5.1294908000000001 | 3.5682380999999998   | H | 3.6341584999999998       | -6.5523974000000003 | -3.8919837999999998E-002 |
| O                       | 3.9040431000000000       | -3.6736650000000002 | -1.2684816000000001  | O | -0.9494541699999999      | -1.5016791000000000 | 4.6750930999999998       |
| H                       | 3.0909018000000001       | -3.6103740000000002 | -0.77496874000000004 | H | -1.1460160000000001      | -2.4964949999999998 | 4.6811999000000002       |
| H                       | 4.5780731000000001       | -3.3146958999999998 | -0.67137959999999997 | H | 1.7782553000000000E-002  | -1.6221563000000001 | 4.7706106999999998       |
| O                       | 0.72457645000000004      | -3.2390574000000001 | -2.3875378000000000  | C | 0.18737193E+01           | -0.28953451E+01     | 0.26294164E+01           |
| H                       | 0.85518388999999995      | -4.1349267999999997 | -2.6640682000000000  | O | 0.18944722E+01           | -0.15253158E+01     | 0.31014707E+01           |
| O                       | 0.92607724999999996      | -3.3503986000000001 | -1.4323128000000001  | C | 0.20758541E+01           | -0.64521236E+00     | 0.20346482E+01           |
| O                       | -1.4364497000000001      | -6.3962332999999996 | 2.3632314000000001   | C | 0.18722828E+01           | -0.13308195E+01     | 0.85063688E+00           |
| H                       | -0.51238238999999997     | -6.5235820999999996 | 2.0642990000000001   | C | 0.18165511E+01           | -0.27767184E+01     | 0.12284290E+01           |
| H                       | -1.5702734000000000      | -7.3164911000000004 | 2.6907827000000002   | O | 0.17581777E+01           | -0.102349883E+01    | 0.42360663E+01           |
| O                       | -1.0576421000000000      | -1.5848154999999999 | 4.4382557000000000   | O | 0.58842928E+00           | -0.76288744E+00     | 0.13910617E+00           |
| O                       | -0.8152744699999997      | -2.5199227000000000 | 4.1494074999999997   | C | -0.56464126E+00          | -0.88651921E+00     | 0.10602894E+00           |
| H                       | -0.3051368899999999      | -1.4296039000000000 | 5.0030104000000000   | O | 1.5676691000000000       | -3.7629418000000001 | 0.38046261999999997      |
| O                       | 4.5368642000000001       | -6.7191463999999996 | 0.76702349000000003  | O | 1.5839646999999999       | -3.9289646999999999 | 3.4305303000000000       |
| H                       | 4.5403599999999997       | -7.5543681099999998 | 0.28174935000000001  | C | 0.69037918E+00           | 0.72063714E+00      | 0.20230346E-01           |
| H                       | 3.7785627000000002       | -6.2751805000000003 | 0.28384547999999998  | O | -0.47234296E+00          | 0.14095365E+01      | -0.40607288E+00          |
| O                       | 1.7931250999999999       | -4.1132080999999996 | 6.4513059000000004   | H | 0.26969384E+01           | -0.10161139E+01     | 0.13126222E+00           |
| H                       | 1.5597555999999999       | -5.0354473999999998 | 6.4658293000000002   | H | 0.89280432E+00           | 0.10752304E+01      | 0.10457807E+01           |
| O                       | 1.4761009000000000       | -3.7935330999999999 | 5.5908085999999999   | H | 0.14730470E+01           | 0.99374552E+00      | -0.65367017E+00          |
| O                       | 1.2946000000000000       | -8.5575462000000009 | 3.2993187000000002   | H | -0.95922307E+00          | 0.14098743E+01      | 0.44311287E+00           |
| H                       | 1.6247638000000000       | -7.7205775000000001 | 3.0780989999999999   | H | 0.43838215E+00           | -0.12396623E+01     | -0.82436661E+00          |
| H                       | 2.1129999000000002       | -9.0862216000000000 | 3.2364552000000000   | H | -0.45517005E+00          | -0.15713884E+01     | 0.17513884E+01           |
| O                       | 5.9292543000000002       | -4.7418836000000004 | 2.1681572999999998   | O | 1.1107402000000000       | -6.1204891999999997 | 1.6577827000000001       |
| H                       | 5.3321731000000003       | -5.4666123000000004 | 1.7782498000000000   | H | 1.2959396000000000       | -5.2659564999999997 | 2.1438131000000000       |
| H                       | 5.5925946000000000       | -4.6367544000000001 | 3.0765680999999998   | H | 1.4243043000000000       | -5.7532595999999998 | 0.80461510999999997      |
| C                       | 0.17377136E+01           | -0.27984279E+01     | 0.25997705E+01       | O | 1.0674482999999999       | -4.4603732000000003 | 0.15956276999999999      |
| C                       | 0.18527159E+01           | -0.15209778E+01     | 0.31342084E+01       | H | -0.15345887999999999     | -4.1965339000000004 | 0.34880843000000000      |
| O                       | 0.21052264E+01           | -0.56318635E+00     | 0.20841367E+01       | H | -1.3068036000000001      | -4.9780119000000003 | 1.0018894000000000       |
| C                       | 0.18006529E+01           | -0.11783314E+01     | 0.82438271E+00       | O | 3.6964185999999999       | -5.6564728999999998 | 3.5223176000000000       |
| C                       | 0.17323505E+01           | -0.26638693E+01     | 0.12169668E+01       | H | 3.0144318999999999       | -4.9137114000000004 | 3.5364822999999999       |
| O                       | 0.20264292E+01           | -0.11588882E+01     | 0.43016431E+01       | H | 3.3065058000000001       | -6.0743233999999999 | 2.7128106000000001       |
| C                       | 0.46098951E+00           | -0.71922112E+00     | 0.34106958E+00       | O | -1.0343058000000001      | -4.2761193000000004 | 4.0015754000000001       |
| O                       | -0.53949663E+00          | -0.94651588E+00     | 0.13139809E+01       | H | -7.2831477000000006E-002 | -4.0540263000000003 | 3.8742679999999998       |
| O                       | 1.6570092000000001       | -3.5684133999999998 | 0.30280392000000000  | H | -1.2026211000000000      | -5.1224572999999998 | 3.5379410000000000       |
| O                       | 1.5707078999999999       | -3.9132939000000002 | 3.3615773999999998   | O | 3.6761626999999999       | -3.6460655000000002 | -1.4545078000000000      |
| C                       | 0.43560536E+00           | 0.80762877E+00      | -0.65769782E-01      | H | 2.8515628000000000       | -3.6633439999999999 | -0.91336402999999999     |
| O                       | -0.86776904E+00          | 0.12981598E+01      | -0.58976917E+00      | H | 4.3817462000000003       | -3.3514859000000001 | -0.91133916999999998     |
| H                       | 0.26984085E+01           | -0.94888066E+00     | 0.15512941E+00       | O | 0.9596241700000000       | -2.9947789999999999 | -2.3454820000000001      |
| H                       | 0.78517364E+00           | 0.15304649E+01      | 0.70131395E+00       | H | 1.2512188000000000       | -3.8862646999999999 | -2.6047158000000001      |
| H                       | 0.11439848E+01           | 0.80795461E+00      | -0.89732797E+00      | H | 0.90035054999999997      | -3.1016420999999998 | -1.3718927000000001      |
| H                       | -0.13585874E+01          | 0.16660523E+01      | 0.21244548E+00       | O | 2.0620840000000000       | -3.9340628000000000 | 6.3494975000000000       |
| H                       | 0.25061905E+00           | -0.12739526E+01     | -0.58976783E+00      | H | 2.2025336000000002       | -4.9318350999999998 | 6.3231415999999996       |
| H                       | -0.49117161E+00          | -0.19148207E+01     | 0.16172013E+01       | H | 1.7451179000000001       | -3.7857145999999999 | 5.4641706000000001       |
| O                       | 1.2502192000000001       | -5.9416121000000004 | 1.6088967999999999   | O | -1.5861628000000001      | -6.3256462999999998 | 2.3826502000000000       |
| H                       | 1.3002602000000001       | -5.2928892000000003 | 2.3623036000000002   | O | -0.6960095100000000      | -6.7032629999999997 | 2.1499044000000000       |
| H                       | 1.5302632000000000       | -5.3364883000000001 | 0.93108732999999999  | H | -1.9511537999999999      | -7.0831895999999999 | 2.8043923999999998       |
| O                       | -1.0266137000000000      | -4.2487138000000000 | 0.36038619000000000  | O | -1.1391433000000000      | -1.5835695000000001 | 4.4086698000000002       |
| H                       | -8.5975222000000004E-002 | -4.1299174000000001 | 0.38745635000000000  | H | -1.1653989000000000      | -2.5513439999999998 | 4.1497394999999999       |
| H                       | -1.1936214999999999      | -4.9368753999999999 | 1.0118670999999999   | H | -0.26017258999999998     | -1.5061382999999999 | 4.6982993999999998       |
| O                       | 3.6245664000000000       | -5.7049225000000003 | 3.3768052000000002   | O | 4.3873711999999996       | -6.6876432000000001 | 0.47792868999999999      |
| H                       | 2.9661141000000000       | -4.9714102999999996 | 3.5152366000000002   | H | 4.3687982999999999       | -7.6453784000000002 | 0.42679578000000001      |
| H                       | 3.3060279000000001       | -6.0132433000000001 | 2.4793329000000002   | H | 3.6467532000000000       | -6.4290468000000001 | -0.10941948999999999     |

|                          |                      |                     |                          |   |                         |                     |                          |
|--------------------------|----------------------|---------------------|--------------------------|---|-------------------------|---------------------|--------------------------|
| O                        | 1.3462164999999999   | -8.7758564000000003 | 2.5007766999999999       | H | 0.13231791E+01          | 0.54651457E+00      | -0.11825063E+01          |
| H                        | 1.3766908000000000   | -7.8170225999999996 | 2.2828860000000000       | H | -0.78374151E+00         | 0.16902483E+01      | 0.36991125E+00           |
| H                        | 2.3258595000000000   | -8.9535765999999999 | 2.6434473000000001       | H | 0.19348718E+00          | -0.12357055E+01     | -0.60082951E+00          |
| O                        | 5.8554164000000002   | -4.7459519999999999 | 2.1095961000000001       | H | -0.37741874E+00         | -0.42829707E+00     | 0.20563993E+01           |
| H                        | 5.4871293999999997   | -5.2961793999999998 | 1.3915093999999999       | O | 1.1140759000000000      | -6.2848464999999996 | 1.6317893999999999       |
| H                        | 5.4121490999999997   | -5.1178955999999998 | 2.9119849000000002       | H | 1.1241961000000000      | -5.5288922999999999 | 2.2832178000000001       |
| C                        | 0.17873337E+01       | -0.29106480E+01     | 0.26763491E+01           | H | 1.6817726000000000      | -5.8715862000000003 | 0.95078183000000005      |
| C                        | 0.18019193E+01       | -0.16213183E+01     | 0.31911312E+01           | O | 3.7084269000000001      | -5.6227042000000003 | 3.7949221999999998       |
| O                        | 0.18661718E+01       | -0.69427032E+00     | 0.21695984E+01           | H | 2.9537078999999999      | -4.9147391000000002 | 3.5543524000000000       |
| C                        | 0.18343621E+01       | -0.13624619E+01     | 0.89942192E+00           | H | 3.7547171000000001      | -6.1223118000000003 | 2.9105150000000002       |
| C                        | 0.17348356E+01       | -0.28221016E+01     | 0.12375033E+01           | O | -0.65454325999999996    | -4.5735124000000003 | -0.11503566000000000     |
| O                        | 0.17527778E+01       | -0.11483731E+01     | 0.43484023E+01           | H | 0.340816320000000001    | -4.6718983999999999 | -6.3938457000000004E-002 |
| C                        | 0.57854139E+00       | -0.81115349E+00     | 0.23288526E+00           | H | -1.0543362999999999     | -4.9392056999999996 | 0.78535948000000000      |
| O                        | -0.63803329E+00      | -0.11182513E+01     | 0.96441699E+00           | O | -1.0716344000000000     | -4.3050883000000004 | 3.9914456999999999       |
| O                        | 1.7937934000000000   | -3.8177390999999998 | 0.39687688999999998      | H | -0.10195395000000000    | -4.3199921999999997 | 4.0377291000000000       |
| O                        | 1.5498741000000000   | -3.9985586000000000 | 3.4327052000000000       | H | -1.1855133000000000     | -4.6703549999999998 | 3.0968735000000001       |
| C                        | 0.76368052E+00       | 0.67175118E+00      | -0.12021165E+00          | O | 4.2129963000000004      | -3.4685934999999999 | -1.44493810000000000     |
| O                        | -0.47489885E+00      | 0.12398720E+01      | -0.53623229E+00          | H | 3.5684062000000001      | -3.6350368000000000 | -0.7266015599999998      |
| H                        | 0.26381644E+01       | -0.11233720E+01     | 0.16039748E+00           | H | 4.7984396000000000      | -2.7916211000000000 | -1.0419246000000000      |
| H                        | 0.12584529E+01       | 0.13114210E+01      | 0.61231307E+00           | O | 4.2937574999999999      | -6.3956321000000003 | 0.58700573000000000      |
| H                        | 0.14306366E+01       | 0.59478510E+00      | -0.98003669E+00          | H | 4.2353660000000000      | -7.3616735999999996 | 0.48500279000000002      |
| H                        | -0.88966809E+00      | 0.17374243E+01      | 0.19187282E+00           | H | 3.4026607000000002      | -6.1793921999999997 | 0.2298490999999999       |
| H                        | 0.33882824E+00       | -0.13207609E+01     | -0.69585590E+00          | O | 1.3554158000000001      | -3.1738944999999998 | -2.3275150000000000      |
| H                        | -0.55794157E+00      | -0.10906574E+01     | 0.19442811E+01           | H | 1.3518916000000001      | -4.0817880999999998 | -2.7418828000000000      |
| O                        | 0.9340896899999997   | -6.2891548000000004 | 1.6864718000000001       | H | 1.6551079000000000      | -3.2790824000000001 | -1.4133728999999999      |
| H                        | 1.0973526000000000   | -5.3300259000000000 | 2.2830716000000000       | O | -1.6115685000000000     | -6.1868261000000002 | 1.7641376000000000       |
| H                        | 1.4428401000000000   | -5.9506227000000003 | 0.96023937000000004      | H | -0.66107099999999996    | -6.2890674999999998 | 1.8096026999999999       |
| O                        | -0.93740038000000003 | -4.5731491999999996 | 0.20116502000000000      | H | -2.0004491999999998     | -7.0154983000000000 | 2.0076687000000000       |
| -4.1161474000000003E-002 | -4.1822343999999996  | 0.38372877999999999 | 0.9758252299999999       | O | 1.7424329000000001      | -4.0941460000000003 | 6.4123444999999997       |
| H                        | -1.0794438000000000  | -5.1445983999999996 | 0.9758252299999999       | H | 1.6416763000000001      | -5.0561616000000003 | 6.4036001999999996       |
| O                        | 3.6410534999999999   | -5.6333510999999996 | 3.8234905000000001       | H | 1.6611729000000000      | -3.8697715000000001 | 5.4729255999999999       |
| H                        | 2.8362487000000001   | -5.0288003000000003 | 3.7699170000000000       | O | 5.2455280000000002      | -1.8121316999999999 | 0.28069738000000000      |
| H                        | 3.4581734000000002   | -6.0101871999999997 | 2.9523532000000001       | H | 4.9733543999999998      | -2.5189183000000002 | 0.84651577000000000      |
| O                        | -1.1045448000000000  | -4.4470910000000003 | 4.1705760999999999       | H | 5.6493051000000003      | -1.2556967999999999 | 0.95721354000000003      |
| H                        | -0.20803114000000000 | -4.3921394999999999 | 3.7808670000000002       | O | 5.7070314000000000      | -4.5477086000000000 | 2.1722204000000001       |
| H                        | -1.4558546999999999  | -5.2267250000000001 | 3.6905891999999998       | H | 5.4351713999999998      | -5.0035626000000004 | 1.4032518000000000       |
| O                        | 3.9100407000000001   | -3.4416140000000001 | -1.5511695999999999      | H | 5.2490914999999996      | -5.1271633999999997 | 2.7962522000000001       |
| H                        | 3.1745491000000001   | -3.7298358999999999 | -0.9239390600000003      | O | 2.1951884000000002      | -6.4304484999999998 | -1.0763387000000000      |
| H                        | 4.3190850000000003   | -2.6864366999999998 | -1.1198409000000000      | H | 2.2982968000000001      | -7.3688832000000000 | -1.4109354999999999      |
| O                        | 5.6394254999999998   | -4.4490908999999999 | 2.3666866999999998       | H | 1.7215529000000001      | -6.0427343999999996 | -1.8293942000000001      |
| H                        | 5.0076891000000003   | -4.7585971000000002 | 1.6535678000000000       | C | 0.15490616E+01          | -0.28972425E+01     | 0.26405270E+01           |
| H                        | 4.9952394000000000   | -4.5917944999999999 | 3.0900488000000001       | C | -0.16032464E+01         | -0.32007920E+01     | 0.32007920E+01           |
| O                        | 1.0012795999999999   | -3.1743456999999999 | -2.4387588000000000      | O | 0.20586184E+01          | -0.65137144E+00     | 0.22016011E+01           |
| H                        | 1.0473091999999999   | -4.1248816000000001 | -2.7424947999999998      | C | 0.19190076E+01          | -0.13162422E+01     | 0.90708033E+00           |
| H                        | 1.2649893000000001   | -3.2261880999999999 | -1.5568676000000001      | C | 0.17403936E+01          | -0.28461389E+01     | 0.12456455E+01           |
| O                        | -1.8662331999999999  | -6.3770929000000001 | 2.1947302000000000       | O | 0.17616062E+01          | -0.11131947E+01     | 0.43282001E+01           |
| H                        | -0.89518892000000005 | -6.4720933000000000 | 2.2665663000000000       | C | 0.72646958E+00          | -0.73312741E+00     | 1.86999444E+00           |
| H                        | -2.2766885000000001  | -7.0708304999999996 | 2.7723361000000000       | O | -0.49874385E+00         | -0.10159703E+01     | 0.88635146E+00           |
| O                        | 1.5139107000000001   | -3.9390065000000001 | 6.4817507000000001       | O | 1.6573831999999999      | -3.7013856999999999 | 0.30612129999999999      |
| H                        | 1.6316335000000000   | -4.9144423000000002 | 6.5126958000000004       | O | 1.2609418999999999      | -3.9087987000000002 | 3.4634410999999998       |
| H                        | 1.4029100000000001   | -3.7868580999999999 | 5.5632890000000002       | C | 0.92419432E+00          | 0.83674372E+00      | -0.84421029E-01          |
| O                        | 4.3415815000000002   | -6.2647655999999996 | 0.6497929399999999       | O | -0.32689977E+00         | 0.14350856E+01      | -0.43351729E+00          |
| H                        | 4.5663387999999996   | -7.1867796999999998 | 0.7045974499999996       | H | 0.28152128E+01          | -0.12774361E+01     | 0.35336388E+00           |
| H                        | 3.6542048000000000   | -6.3334380000000001 | -7.0556138000000004E-002 | H | 0.14410165E+01          | 0.13322353E+01      | 0.77099978E+00           |
| O                        | 2.2189665999999999   | -6.5838599000000002 | -0.8956861600000001      | H | 0.15158464E+01          | 0.95188664E+00      | -0.10210269E+01          |
| H                        | 2.0125521000000002   | -7.4716537000000001 | -1.2525955000000000      | H | -0.57608112E+00         | 0.20163594E+01      | 0.30422314E+00           |
| H                        | 1.7241420000000001   | -5.9316991999999997 | -1.3327298999999999      | H | 0.58424108E+00          | -0.13960856E+01     | -0.72146339E+00          |
| O                        | -1.1556200999999999  | -1.6288863000000000 | 4.0562676000000000       | H | -0.53055120E+00         | -0.60407864E+00     | 0.17623463E+01           |
| H                        | -1.2416461999999999  | -2.6187342999999998 | 4.2505544000000004       | O | 1.5972435000000000      | -5.9936822000000003 | 1.7749480000000000       |
| H                        | -0.3601997100000001  | -1.2485766000000000 | 4.4517065000000002       | H | 1.5087200999999999      | -5.5055892000000002 | 2.6106017000000001       |
| C                        | 0.16496266E+01       | -0.29802481E+01     | 0.26626887E+01           | H | 1.6028727000000000      | -5.1923481999999996 | 1.1950639999999999       |
| C                        | 0.17281340E+01       | -0.16318600E+01     | 0.32331404E+01           | O | -0.75143534999999995    | -4.6012868999999998 | -0.36761880000000002     |
| O                        | 0.18467098E+01       | -0.64658532E+00     | 0.22306798E+01           | H | 4.7849633000000003E-002 | -4.1964310999999999 | -5.0642312000000002E-002 |
| C                        | 0.17544772E+01       | -0.13833862E+01     | 0.87392140E+00           | H | -0.10347049999999999    | -5.0205408000000000 | 0.50379708000000001      |
| C                        | 0.18299046E+01       | -0.28495823E+01     | 0.12340585E+01           | O | 3.5416851999999999      | -5.5345651000000000 | 3.8582746000000001       |
| O                        | 0.16441313E+01       | -0.12182543E+01     | 0.43892110E+01           | H | 2.7089419000000001      | -4.9757949000000004 | 3.9578142999999999       |
| C                        | 0.48578705E+00       | -0.69542576E+00     | 0.28270095E+00           | H | 3.5990061000000000      | -5.7941742999999999 | 2.9208402000000002       |
| O                        | -0.63004126E+00      | -0.72837699E+00     | 0.11508176E+01           | O | -0.96433840000000004    | -4.9470821999999997 | 4.5154027000000001       |
| O                        | 1.9446494999999999   | -3.7536543000000000 | 0.38046744999999998      | H | -0.11543808000000000    | -4.5873543999999997 | 4.2058337999999997       |
| O                        | 1.5371475999999999   | -4.1118899999999998 | 3.3292063999999999       | H | -1.3859128999999999     | -5.1613341000000004 | 3.7013881000000000       |
| C                        | 0.78365362E+00       | 0.70772853E+00      | -0.22513041E+00          | O | 3.9720480000000000      | -3.5246281000000002 | -1.5369037999999999      |
| O                        | -0.39824780E+00      | 0.14652019E+01      | -0.48168223E+00          | H | 3.3442691000000000      | -3.7761127999999999 | -0.86271220000000004     |
| H                        | 0.25939259E+01       | -0.93244409E+00     | 0.38459649E+00           | H | 4.5220054000000003      | -2.9467189000000000 | -0.96790334000000000     |
| H                        | 0.14110825E+01       | 0.13019338E+01      | 0.47160651E+00           | O | 1.9365129000000001      | -4.3281669000000003 | 6.1954044000000001       |
|                          |                      |                     |                          | H | 1.6300456999999999      | -5.0942895999999998 | 6.5600379000000002       |

|   |                      |                     |                         |   |                         |                     |                          |
|---|----------------------|---------------------|-------------------------|---|-------------------------|---------------------|--------------------------|
| H | 1.7089383000000000   | -4.244292999999999  | 5.2617493000000000      | C | 0.19351772E+01          | -0.16289609E+01     | 0.30364067E+01           |
| O | 1.1096854000000000   | -3.0631374000000000 | -2.3968354000000001     | O | 0.22601313E+01          | -0.73041774E+00     | 0.20019683E+01           |
| H | 1.2535590000000001   | -3.965395599999999  | -2.6795734000000002     | C | 0.19718931E+01          | -0.14627304E+01     | 0.76458299E+00           |
| H | 1.4686246999999999   | -3.1990538000000002 | -1.4860913000000000     | C | 0.16851431E+01          | -0.28551446E+01     | 0.12004907E+01           |
| O | -1.1804905999999999  | -2.1541893000000001 | 4.2993927999999997      | O | 0.19086730E+01          | -0.12414771E+01     | 0.42425070E+01           |
| H | -1.3657944000000000  | -3.1298314000000000 | 4.1855324999999999      | C | 0.60582657E+00          | -0.88481131E+00     | 0.20341876E+00           |
| H | -0.2525986200000000  | -2.1006806999999998 | 4.4160465000000002      | O | -0.42384711E+00         | -0.10782167E+01     | 0.11552740E+01           |
| O | 4.3040817000000002   | -6.3066852999999998 | 1.1079363000000000      | O | 1.6048781000000001      | -3.7916682000000002 | 0.31941609999999998      |
| H | 4.1120492000000004   | -7.2116521000000002 | 1.2811166000000000      | O | 1.0707926999999999      | -3.8322989999999999 | 3.3597964999999999       |
| H | 3.7439401999999999   | -6.0856994000000002 | 0.3434324000000003      | C | 0.70612115E+00          | 0.63080173E+00      | -0.68983321E-01          |
| O | 2.2552580999999998   | -6.4751548999999997 | -1.0127733999999999     | O | -0.49072756E+00         | 0.12101762E+01      | -0.46926419E+00          |
| H | 2.2695286000000001   | -7.3936130999999996 | -1.2634704000000001     | H | 0.27645271E+01          | -0.14271925E+01     | -0.38336303E-01          |
| H | 1.3249089000000001   | -6.4823817999999997 | -0.6348504999999998     | H | 0.97583617E+00          | 0.10304143E+01      | 0.87961021E+00           |
| O | -1.4551982999999999  | -6.2613510000000003 | 1.9254494000000000      | H | 0.14082250E+01          | 0.77680923E+00      | -0.87989019E+00          |
| H | -0.6679527400000004  | -6.7883924999999996 | 2.3248182000000002      | H | -0.96954499E+00         | 0.12203198E+01      | 0.32092251E+00           |
| H | -2.1825065000000001  | -6.9114551000000004 | 2.0386557999999999      | H | 0.32588386E+00          | -0.13687865E+01     | -0.77229000E+00          |
| O | -2.7398186999999998  | -2.7768193999999999 | 0.4525089000000001      | H | -0.12350424E+00         | -0.17862302E+01     | 0.18427144E+01           |
| H | -2.7786591999999999  | -2.9056449999999998 | -0.4919517299999998     | O | 1.3355890000000001      | -6.0888923999999998 | 1.9366137999999999       |
| H | -1.8354440000000001  | -2.4313755000000001 | 0.6213048599999996      | H | 1.2714334000000000      | -5.1860062999999998 | 2.4195350000000002       |
|   |                      |                     |                         | H | 1.6615940000000000      | -5.7417261000000002 | 1.1083177000000000       |
| C | 0.16462238E+01       | -0.29146318E+01     | 0.25824248E+01          | O | -0.8659564600000004     | -4.7817612000000000 | -0.29685334000000002     |
| C | 0.16997191E+01       | -0.15202033E+01     | 0.31428029E+01          | H | 1.6556998000000000E-002 | -4.3804613999999997 | -2.4939077000000000E-002 |
| O | 0.20460991E+01       | -0.59704872E+00     | 0.21943690E+01          | H | -1.2238705000000001     | -4.8655416999999996 | 0.57118829999999998      |
| C | 0.20711727E+01       | -0.12862379E+01     | 0.87071765E+00          | O | 3.5890477000000001      | -5.2399729599999998 | 3.5575244000000000       |
| C | 0.19097183E+01       | -0.28098841E+01     | 0.12055917E+01          | H | 3.3045811000000000      | -4.4702203000000003 | 4.0975083999999997       |
| O | 0.15727111E+01       | -0.11558314E+01     | 0.43274870E+01          | H | 2.7545220000000001      | -5.5684810000000002 | 3.1991930000000000       |
| C | 0.77117866E+00       | -0.75224621E+00     | 0.20534246E+00          | O | -1.0374348000000000     | -2.4805043000000002 | 4.6854417000000002       |
| O | -0.25651701E+00      | -0.10122955E+01     | 0.11565734E+01          | H | -0.41229937000000000    | -3.1376824000000001 | 4.2725596000000001       |
| O | 2.0029515999999998   | -3.7450602000000002 | 0.29407311000000003     | H | -0.39420454999999999    | -1.9931291000000000 | 5.1844887999999996       |
| O | 1.2991603000000000   | -3.9684898000000001 | 3.3839361999999999      | O | -0.93118347000000001    | -5.4437616000000002 | 4.6067660999999998       |
| C | 0.89987630E+00       | 0.69033441E+00      | -0.14471892E+00         | H | -0.29413317999999999    | -4.8782062000000002 | 4.2149786000000002       |
| O | -0.34076495E+00      | 0.12886711E+01      | -0.52843236E+00         | H | -1.4529185000000000     | -5.5932931000000004 | 3.8119874000000000       |
| H | 0.30464629E+01       | -0.10676708E+01     | 0.42547355E+00          | O | -1.6549187999999999     | -6.1407211000000004 | 2.0636944000000002       |
| H | 0.12703964E+01       | 0.12742227E+01      | 0.77476301E+00          | H | -0.71829933999999995    | -6.3646183000000001 | 2.0823594000000001       |
| H | 0.16563894E+01       | 0.93162150E+00      | -0.88480157E+00         | H | -2.0367451000000001     | -6.9189040999999998 | 2.4545016999999998       |
| H | -0.92262491E+00      | 0.14294354E+01      | 0.26825282E+00          | O | 1.0807089999999999      | -3.0808865000000000 | -2.3531844999999998      |
| H | 0.60581647E+00       | -0.13607162E+01     | -0.63421165E+00         | H | 1.0033272000000000      | -4.0024727000000002 | -2.7503491000000002      |
| H | -0.14840628E+00      | -0.42304628E+00     | 0.19244911E+01          | H | 1.0964214999999999      | -3.2996384999999999 | -1.3999843000000001      |
| O | 1.2591026999999999   | -5.9881665000000002 | 1.8186372000000000      | O | 4.0735628000000004      | -3.7493099000000001 | -1.5832655000000000      |
| H | 1.1569288000000000   | -5.3923439999999996 | 2.5954348000000000      | C | 3.2743456000000002      | -3.8996148000000002 | -1.0872990000000000      |
| H | 1.7609695999999999   | -5.2945059999999999 | 1.2873772999999999      | H | 4.6159536000000001      | -3.2402628000000000 | -0.94287701999999995     |
| O | 3.5581296999999998   | -5.4401739999999998 | 3.3874575000000000      | O | 1.9358607999999999      | -4.3477557999999998 | 6.1812155000000004       |
| H | 2.6631366000000001   | -5.0171688000000003 | 3.2804172000000000      | H | 1.3366450999999999      | -4.9722344999999999 | 6.5126511999999996       |
| H | 3.5963558999999998   | -6.0035147999999996 | 2.5647912000000002      | H | 1.6149254000000000      | -4.2670446000000002 | 5.3212773000000002       |
| O | -0.5667336400000004  | -4.8462496000000002 | -0.25621370999999998    | O | -2.5364399000000000     | -2.7041791000000002 | 0.40128068000000000      |
| H | 0.2268530000000000   | -4.3662932000000003 | 6.0577442000000002E-002 | H | -2.1058764000000001     | -3.2170372999999999 | -0.30441391000000001     |
| H | -0.7617879499999999  | -5.3685581000000004 | 0.5343250699999996      | H | -1.8461528000000000     | -2.0869686000000001 | 0.74630991999999996      |
| O | -1.0639873000000000  | -0.0684059000000001 | 4.3635853999999998      | O | 2.4529865000000002      | -6.4198830999999998 | -1.1254109000000001      |
| H | -0.20234849999999999 | -4.7955430000000003 | 4.0092740999999998      | H | 2.0811316999999998      | -7.2753236000000001 | -1.2551767000000000      |
| H | -1.4706052999999999  | -5.5679363000000004 | 3.6154939000000001      | H | 1.7405455999999999      | -5.8281928000000001 | -1.4388612000000001      |
| O | 4.0076989999999997   | -3.8004671999999999 | -1.5042720999999999     | O | 0.98035746999999995     | -8.6467796000000003 | 2.5795200999999999       |
| H | 3.4824454000000000   | -3.9260399000000001 | -0.6501660099999996     | H | 1.1854490000000000      | -7.7223163000000001 | 2.2652516999999999       |
| H | 4.4082338999999999   | -2.9695530000000001 | -1.3271568000000000     | H | 1.8812930999999999      | -8.9734984999999998 | 2.5915501000000001       |
| O | -1.1418276000000001  | -2.3260950999999999 | 4.2426186000000001      |   |                         |                     |                          |
| H | -1.2541475000000000  | -3.2958085000000001 | 4.1403363000000004      | C | 0.16188385E+01          | -0.29120408E+01     | 0.26655029E+01           |
| H | -0.16268627999999999 | -2.2503533000000000 | 4.1594490999999998      | C | 0.18739273E+01          | -0.15880918E+01     | 0.31370610E+01           |
| O | 1.2258861999999999   | -3.1459058000000000 | -2.4532809000000002     | O | 0.22748900E+01          | -0.74278800E+00     | 0.20991965E+01           |
| H | 1.3098234000000000   | -4.0455958000000001 | -2.8846948000000001     | C | 0.20739155E+01          | -0.14566145E+01     | 0.86743005E+00           |
| H | 1.5327317000000000   | -3.4217349000000001 | -1.5094997000000001     | C | 0.18784657E+01          | -0.29252301E+01     | 0.13022061E+01           |
| O | 1.6315805999999999   | -4.3988426000000000 | 6.2209230000000000      | O | 0.18323907E+01          | -0.11432443E+01     | 0.42926932E+01           |
| H | 1.0317107000000001   | -5.0325056000000004 | 6.4363751999999996      | C | 0.79015318E+00          | -0.87130398E+00     | 0.31188246E+00           |
| H | 1.5624813000000000   | -4.3486140000000004 | 5.2600372000000002      | O | -0.36556629E+00         | -0.12066436E+01     | 0.11282198E+01           |
| O | 5.8225252999999997   | -4.2578076999999999 | 2.2073691000000002      | O | 1.7786549000000000      | -3.8241570999999999 | 0.38423732999999999      |
| H | 5.5799807000000001   | -4.9936099000000000 | 1.5764205000000000      | O | 1.3485008000000001      | -3.9099495000000002 | 3.5326529999999998       |
| H | 4.9965320000000002   | -4.2766487000000000 | 2.8299208000000000      | C | 0.82354068E+00          | 0.68131298E+00      | 0.15510016E+00           |
| O | 2.7637737000000002   | -6.4934167000000000 | -1.1496329999999999     | O | -0.40510473E+00         | 0.12682098E+01      | -0.30240674E+00          |
| H | 2.2646027000000002   | -7.2786334000000004 | -1.0031090000000000     | H | 0.29594468E+01          | -0.12933140E+01     | 0.25596376E+00           |
| H | 2.0311799000000001   | -5.8898282999999996 | -1.2040687000000001     | H | 0.12112346E+01          | 0.13009487E+01      | 0.10277567E+01           |
| O | 4.5833909999999998   | -6.7086940999999998 | 1.0361317999999999      | O | 0.15265371E+01          | 0.88233590E+00      | -0.67831080E+00          |
| H | 4.5238202000000003   | -7.5907188999999997 | 0.6772042000000003      | H | -0.89632848E+00         | 0.16781598E+01      | 0.40770449E+00           |
| H | 4.1138352999999999   | -6.2749059000000003 | 0.2903259899999998      | H | 0.59438846E+00          | -0.12277969E+01     | -0.68399607E+00          |
| O | -1.4356393000000001  | -6.2719810999999996 | 1.7193826999999999      | H | -0.25887987E+00         | -0.19521748E+01     | 0.17362787E+01           |
| H | -0.6888499799999997  | -6.8405205999999996 | 2.0828326000000001      | O | 1.3245575000000001      | -6.1027525999999996 | 1.8248598000000000       |
| H | -2.1818628000000002  | -6.8243228000000000 | 1.9276257000000001      | H | 1.1109116000000001      | -5.3815622000000003 | 2.4770550999999998       |
|   |                      |                     |                         | H | 1.5258451000000000      | -5.5625300000000003 | 1.0676793000000000       |
|   |                      |                     |                         | O | 3.6080592000000000      | -5.2883490000000002 | 3.8488554000000001       |
| C | 0.14376633E+01       | -0.28429876E+01     | 0.25942007E+01          |   |                         |                     |                          |

|   |                     |                       |                          |   |                          |                     |                         |
|---|---------------------|-----------------------|--------------------------|---|--------------------------|---------------------|-------------------------|
| H | 2.8927941000000001  | -4.6011687999999999   | 3.7619015999999998       | H | 5.1430156000000000       | -4.9081878000000003 | 1.7715263000000001      |
| H | 2.9483313999999998  | -6.0689190999999996   | 3.9073033000000001       | H | 4.9560541999999996       | -4.2833418999999999 | 3.1400318000000000      |
| O | -0.6012745800000000 | -4.9348643000000001   | -0.6682125199999998      | O | 1.2051289000000001       | -8.6014034000000006 | 2.5348071999999999      |
| H | 0.3366566300000000  | -4.7115486000000004   | -0.5943658699999996      | H | 1.1541283000000000       | -7.6295468000000000 | 2.2716620999999999      |
| H | -0.8923162399999998 | -4.7841961000000000   | 0.2828471699999998       | H | 2.1086230000000001       | -8.8943957000000005 | 2.5949018000000001      |
| O | -1.1370161000000001 | -5.3576853000000000   | 4.4879832999999998       | O | -1.0483404000000001      | -1.8411575000000000 | 4.3960270000000001      |
| H | -0.4250001199999998 | -4.9816310000000001   | 3.9458072999999998       | H | -1.2678248999999999      | -2.7967070000000001 | 4.4264881999999997      |
| H | -1.4965021000000001 | -5.9005121999999997   | 3.8698369000000001       | H | -8.3256811000000000E-002 | -1.7062609000000000 | 4.7617491999999997      |
| O | 1.1112931200000000  | -3.1420854999999999   | -2.2323458000000000      | O | 4.4441718000000003       | -3.4682572999999999 | -1.5840183000000001     |
| H | 0.9264500599999996  | -4.0015992000000002   | -2.6517648999999999      | H | 3.5787422000000000       | -1.5934725000000001 | -1.2645728000000001     |
| H | 1.4834094000000000  | -3.3614834000000000   | -1.3185366999999999      | H | 4.7585889000000003       | -2.7598620000000000 | -1.0297430999999999     |
| O | -1.0248967000000000 | -2.2211210000000001   | 4.8859807999999996       |   |                          |                     |                         |
| H | -0.3984208300000000 | -2.8746402999999998   | 4.5030951999999997       | C | 0.15438651E+01           | -0.28375602E+01     | 0.26628892E+01          |
| H | -0.4794716700000000 | -1.6685691000000000   | 5.4117313999999999       | C | 0.17679928E+01           | -0.15829290E+01     | 0.32257970E+01          |
| O | 1.6196261000000001  | -4.1863966000000001   | 6.3082662999999997       | O | 0.19982960E+01           | -0.61385272E+00     | 0.22063739E+01          |
| H | 1.4632806000000000  | -5.0475063000000002   | 6.5737629999999996       | C | 0.17940289E+01           | -0.12646030E+01     | 0.94607819E+00          |
| H | 1.4285884000000000  | -4.1233947000000004   | 5.3105764999999998       | C | 0.16087524E+01           | -0.26931302E+01     | 0.12218910E+01          |
| O | 4.3827847000000002  | -6.7896533999999997   | 0.9403683299999997       | O | 0.20107500E+01           | -0.12071864E+01     | 0.44290809E+01          |
| H | 3.6833222000000001  | -6.7646345999999999   | 1.6397493999999999       | C | 0.55102077E+00           | -0.60855473E+00     | 0.25370766E+00          |
| H | 3.8737946000000001  | -6.4757416000000001   | 0.1500032299999999       | O | -0.67181312E+00          | -0.10275979E+01     | 0.97845539E+00          |
| O | 4.3749400999999999  | -3.6547858000000000   | -1.6285788999999999      | O | 1.6027420999999999       | -3.6394834999999999 | 0.3800343400000000      |
| H | 3.6642166000000000  | -4.0040579999999997   | -1.1170947000000000      | O | 1.2474742999999999       | -3.9183932000000001 | 3.3677719000000002      |
| H | 4.7029249999999996  | -2.9178557999999999   | -1.0865975999999999      | C | 0.71779888E+00           | 0.85508771E+00      | 0.27105992E+00          |
| O | -1.9237010999999999 | -6.0655609000000004   | 1.8591253000000001       | O | 0.15736672E+01           | -0.15736672E+01     | -0.15081445E+00         |
| H | -1.1859527999999999 | -6.6285261999999996   | 1.5155700999999999       | H | 0.26191715E+01           | -0.10135163E+01     | 0.27548856E+00          |
| H | -2.2325548000000000 | -6.7613127999999998   | 2.5087595000000000       | H | 0.09644416E+00           | 0.11623222E+01      | 0.12718908E+01          |
| O | 5.2521212999999998  | -2.0749770999999999   | 0.3634192900000001       | H | 0.15197347E+01           | 0.11752444E+01      | -0.36266170E+00         |
| H | 5.2725058000000002  | -2.8388160999999998   | 0.9726855500000001       | H | -0.72277217E+00          | 0.23109200E+01      | 0.40962258E+00          |
| H | 5.7615197000000000  | -1.397068143000000005 | 0.9798814300000005       | H | 0.42640393E+00           | -0.99085473E+00     | -0.75834606E+00         |
| O | 3.8166226000000001  | -2.5830665000000002   | 5.7381622999999999       | H | -0.44268832E+00          | -0.11602826E+01     | 0.19033388E+01          |
| H | 3.0534488999999998  | -2.2388823000000002   | 5.2777241999999998       | O | 1.0238421000000000       | -6.0621333999999996 | 1.6541056999999999      |
| H | 3.4982590999999998  | -3.4204984000000000   | 6.1044546000000004       | H | 0.8699686899999999       | -5.4207713000000002 | 2.3661219000000000      |
|   |                     |                       |                          | H | 1.3962087000000001       | -5.4235954000000000 | 0.9693449499999998      |
| C | 0.15969875E+01      | -0.29345006E+01       | 0.26342080E+01           | O | -0.8274661599999995      | -4.5032848000000003 | -0.4392355100000000     |
| C | 0.20306595E+01      | -0.16541541E+01       | 0.31191330E+01           | H | 4.8432725000000003E-002  | -4.2113497000000004 | -0.1257775499999999     |
| O | 0.21864192E+01      | -0.74230658E+00       | 0.21185708E+01           | H | -1.2215075000000000      | -4.8285998000000001 | 0.3721474300000000      |
| C | 0.18821655E+01      | -0.14599026E+01       | 0.86559388E+00           | O | 3.3554737000000001       | -5.1932666999999997 | 4.2647747999999996      |
| C | 0.17126899E+01      | -0.28943610E+01       | 0.12321599E+01           | H | 2.6863022999999999       | -4.5116017400000000 | 3.9916507000000001      |
| O | 0.20928552E+01      | -0.12582341E+01       | 0.43230998E+01           | H | 2.8877207999999999       | -5.8666008999999999 | 3.7644426000000002      |
| C | 0.69908643E+00      | -0.74174493E+00       | 0.29711326E+00           | O | -1.2098342000000000      | -4.5608148000000002 | 4.4655680999999996      |
| O | -0.52811789E+00     | -0.99871819E+00       | 0.10690311E+01           | H | -0.2977070399999998      | -4.4010980999999996 | 4.0242969999999998      |
| O | 1.5592728000000000  | -3.8316395000000001   | 0.3829348100000001       | H | -1.8138190000000001      | -4.8089234000000003 | 3.6777096999999999      |
| O | 1.3066917000000000  | -3.9820538999999999   | 3.4802165999999999       | O | 1.5492763000000001       | -2.8788649999999998 | -2.2811203999999998     |
| C | 0.83391935E+00      | 0.78580771E+00        | 0.28409364E+00           | H | 1.5146417000000001       | -3.7462993000000000 | -2.6950585999999999     |
| O | -0.29685719E+00     | 0.13625938E+01        | -0.33405593E+00          | H | 1.5332275000000000       | -3.0564311000000002 | -1.3198806000000001     |
| H | 0.27779188E+01      | -0.12146780E+01       | 0.24243423E+00           | O | 5.2149266000000001       | -4.5032848000000003 | 2.1518432999999999      |
| H | 0.85459206E+00      | 0.11258177E+01        | 0.13597825E+01           | H | 5.2371451999999996       | -4.9554137999999996 | 1.6387007000000000      |
| H | 0.18310467E+01      | -0.10674961E+00       | -0.10674961E+00          | H | 4.6064290999999997       | -4.3609200000000001 | 2.8865715999999999      |
| H | -0.72931978E+00     | 0.17352287E+01        | 0.48809096E+00           | O | -1.8625510000000001      | -5.9426464000000001 | 1.7839434999999999      |
| H | 0.50319457E+00      | -0.11281913E+01       | -0.70090799E+00          | H | -0.9691820500000002      | -6.2243570000000004 | 1.8790878000000000      |
| H | -0.35750692E+00     | -0.74590196E+00       | 0.19606840E+01           | H | -2.3000001999999999      | -6.4882774999999997 | 2.4768164000000001      |
| O | 1.1820930000000001  | -6.0913399000000004   | 1.8253710999999999       | O | 1.6782121000000001       | -3.9310467999999998 | 6.2741810999999998      |
| H | 0.7998527399999995  | -5.4863796999999996   | 2.5796717000000000       | H | 1.6772689000000001       | -4.8705037999999998 | 6.4965004999999998      |
| H | 1.5205378000000001  | -5.3878424999999996   | 1.1894340000000001       | H | 1.4534315000000000       | -3.9282352000000000 | 5.3091039999999996      |
| O | -0.7512223000000001 | -4.8870884999999999   | -0.5667902900000003      | O | -1.0428930999999999      | -1.5412739000000000 | 4.4574293999999997      |
| H | 0.1290372400000000  | -4.6194078999999997   | -0.2113416900000000      | H | -0.9541704800000004      | -2.4005512000000002 | 4.1122790000000000      |
| H | -1.2745685000000000 | -4.3019970000000001   | -6.9145261000000003E-003 | H | -0.2855489199999998      | -1.5080249999999999 | 4.9439054000000002      |
| O | 3.5997891000000002  | -5.2042647000000004   | 4.0411275000000000       | O | 5.0526625999999997       | -1.9265040000000000 | 0.5183912899999995      |
| H | 2.9088718999999998  | -4.4982721000000003   | 4.2309163999999999       | H | 5.0327641999999999       | -2.6070028999999999 | 1.2280838000000001      |
| H | 3.1322969000000001  | -5.5345101000000003   | 3.2178019000000000       | H | 5.7656820000000000       | -1.4072827000000001 | 0.8333967399999997      |
| O | -1.2217829000000000 | -4.5148622999999999   | 4.3202859000000000       | O | 4.4184038000000001       | -6.3673751000000003 | 0.6249024100000002      |
| H | -0.3477794799999997 | -4.3818570000000001   | 3.8814793999999999       | H | 4.0718503999999998       | -6.7186609500000001 | 1.4886801000000001      |
| H | -1.7496171000000000 | -4.9511165999999998   | 3.6024362000000001       | H | 3.6154937000000000       | -6.4839009000000001 | 6.7952788000000000E-002 |
| O | 4.1110315999999996  | -6.2998531000000000   | 0.8368521399999997       | O | 1.4128704999999999       | -8.6834852999999992 | 2.2078788000000000      |
| H | 3.1653402000000002  | -6.3674764000000001   | 1.2154453999999999       | H | 1.2992400000000000       | -7.7503174000000001 | 1.9051572000000001      |
| H | 3.8765092999999999  | -6.1747541999999997   | -9.0141120000000005E-002 | H | 2.2843523999999999       | -8.6015768000000001 | 2.6096583999999998      |
| O | 1.4531380000000000  | -3.0157878000000000   | -2.1250271000000001      |   |                          |                     |                         |
| H | 1.1801628000000000  | -3.9206953000000002   | -2.3686870000000000      | C | 0.14862316E+01           | -0.28878974E+01     | 0.24425595E+01          |
| H | 1.7880739000000001  | -3.1307209000000000   | -1.2320762999999999      | C | 0.17117788E+01           | -0.16050268E+01     | 0.30392992E+01          |
| O | -1.6893129000000000 | -6.0133631999999997   | 2.0292796000000002       | O | 0.19098927E+01           | -0.59783660E+00     | 0.21384556E+01          |
| H | -0.9114927299999997 | -6.2397182999999998   | 1.5922506000000001       | C | 0.17763237E+01           | -0.12105547E+01     | 0.83141495E+00          |
| H | -2.1151977000000000 | -6.8933147000000004   | 2.3623318000000002       | C | 0.16219440E+01           | -0.2055284E+01      | 0.10652925E+01          |
| O | 1.2501650000000000  | -3.8354572000000000   | 6.2896646000000000       | O | 0.18836163E+01           | -0.12481921E+01     | 0.42674631E+01          |
| H | 1.3506737000000000  | -4.7891684000000003   | 6.3860318999999999       | C | 0.59258260E+00           | -0.55420382E+00     | 0.18562217E+00          |
| H | 1.1692207999999999  | -3.7722931000000002   | 5.2989107999999998       | O | -0.64007836E+00          | -0.83023880E+00     | 0.89228543E+00          |
| O | 5.4927922999999996  | -4.1856762999999999   | 2.3328454999999999       | O | 1.7939943000000000       | -3.6148064999999998 | 0.13442519999999999     |



|   |                          |                     |                      |   |                          |                      |                      |
|---|--------------------------|---------------------|----------------------|---|--------------------------|----------------------|----------------------|
| O | 5.8094127000000002       | -4.0093744999999998 | 2.6730838000000001   | H | -0.28521497E+00          | -0.14318513E+01      | 0.18861926E+01       |
| H | 5.4967347000000002       | -4.3258764999999997 | 1.8317564000000000   | O | 1.5040526999999999       | -6.2349914000000002  | 1.5082781999999999   |
| H | 5.8085785000000003       | -4.8090731000000000 | 3.2522706000000001   | H | 1.3644049000000000       | -5.5579603999999998  | 2.2106526000000000   |
| C | 0.18059173E+01           | -0.29069395E+01     | 0.26111476E+01       | H | 1.8301798000000000       | -5.6353572999999999  | 0.79161320000000002  |
| C | 0.18229939E+01           | -0.15746072E+01     | 0.30758342E+01       | O | -0.84814575000000003     | -4.5859287999999996  | 4.0795629000000000   |
| O | 0.20609104E+01           | -0.7666294E+00      | 0.20771183E+01       | H | 0.11791081000000000      | -4.60405840000000004 | 3.8900671000000000   |
| C | 0.18424985E+01           | -0.13397820E+01     | 0.81837544E+00       | H | -1.1613088000000000      | -4.9674202000000003  | 3.2492966999999999   |
| O | 0.18114103E+01           | -0.28266402E+01     | 0.12266881E+01       | O | -0.80926498999999996     | -4.5412856000000001  | -0.38322927000000001 |
| C | 0.18212311E+01           | -0.11478428E+01     | 0.42850916E+01       | H | 9.3305026999999999E-002  | -4.2325955999999998  | -0.28331972000000000 |
| C | 0.46902741E+00           | -0.78707243E+00     | 0.19598354E+00       | H | -0.88856999999999997     | -5.0975769000000000  | 0.39443990000000001  |
| O | -0.73288244E+00          | -0.12569243E+01     | 0.77620056E+00       | O | 4.3356098999999997       | -5.5566526999999999  | 1.0262027000000000   |
| O | 1.8401472000000001       | -3.7335482000000000 | 0.3845989300000001   | H | 4.1003565000000002       | -6.3809898000000000  | 1.5156794000000000   |
| O | 1.7738364000000000       | -3.9847883999999998 | 3.4353373000000000   | H | 3.5764216000000002       | -5.6019819000000002  | 0.37507245000000000  |
| C | 0.61595570E+00           | 0.61595570E+00      | 0.26427926E+00       | O | 3.7589978999999998       | -5.3519920000000001  | 4.7284185000000001   |
| O | -0.55172050E+00          | 0.13872865E+01      | -0.15713632E+00      | H | 3.9930298000000000       | -4.4216334000000002  | 4.7006237000000004   |
| H | 0.26193066E+01           | -0.12677206E+01     | 0.87452310E-01       | H | 2.9089464999999999       | -5.3371506999999996  | 4.3121745000000002   |
| H | 0.77167608E+00           | 0.11204182E+01      | 0.12546579E+01       | O | -1.1969464000000001      | -6.2999284000000004  | 1.7987074999999999   |
| H | 0.13752534E+01           | 0.11152534E+01      | -0.41148506E+00      | H | -0.2089789000000001      | -6.4142020999999998  | 1.6109203999999999   |
| H | -0.12599979E+01          | 0.12772251E+01      | 0.55422342E+00       | H | -1.49759779000000000     | -6.9113952000000003  | 2.4954589000000000   |
| H | 0.57120090E+00           | -0.12323297E+01     | -0.83824202E+00      | O | 1.8916724000000000       | -3.0798722000000001  | -2.1945275999999998  |
| H | -0.50820191E+00          | -0.19422923E+01     | 0.13934243E+01       | H | 1.5071812000000000       | -3.9178392999999998  | -2.4502755000000001  |
| O | 1.4357354000000000       | -6.1337329000000000 | 1.8246765000000000   | H | 1.7544050000000000       | -3.2736469000000001  | -1.1943832000000001  |
| H | 1.4814065000000001       | -5.5415182999999999 | 2.5774889999999999   | O | 1.7824327000000000       | -3.9415651999999999  | 6.4592998000000001   |
| H | 1.8400751000000000       | -5.4104355000000002 | 1.2505057999999999   | H | 1.8889608000000000       | -4.9390156999999997  | 6.6454231999999998   |
| O | -0.9228492600000000      | -4.2016957000000001 | 3.8125152999999999   | H | 1.6483718000000001       | -3.9143805000000000  | 5.4941250999999998   |
| H | 3.1173223999999999E-002  | -4.1102372999999996 | 3.6610160999999999   | O | 6.0484526000000001       | -4.2747644999999999  | 2.7502651999999999   |
| H | -1.1500847000000001      | -4.8562944000000003 | 3.1176035999999998   | H | 5.3060517000000003       | -4.7152285999999997  | 2.2690106999999999   |
| O | 3.7881293000000000       | -5.2149565000000004 | 4.6492179000000000   | H | 5.8794741000000004       | -4.7720415000000003  | 3.5421347999999999   |
| H | 4.0384251000000004       | -4.5676474000000002 | 5.3243745999999996   | O | -0.8986115900000000      | -1.7297716999999999  | 4.1538184999999999   |
| H | 3.1384382999999998       | -4.7395906999999999 | 4.0506732000000003   | H | -0.93302890000000005     | -2.7304157999999998  | 4.1017064000000003   |
| O | 4.3917764999999997       | -5.4456895000000003 | 0.93641247000000005  | H | -7.9582283999999996E-004 | -1.6692697000000001  | 4.5085205999999998   |
| H | 4.1772403000000002       | -6.3500012999999997 | 1.2644500000000001   | O | 1.1586978999999999       | -8.6848893999999994  | 2.4196753000000002   |
| H | 3.6079482000000000       | -5.1514705999999997 | 0.3766388900000000   | H | 1.1909471000000000       | -7.7459118000000000  | 2.0971977000000002   |
| O | -0.8948749400000001      | -4.5912521000000002 | -0.39031139999999998 | H | 2.0929608000000002       | -8.7355315999999998  | 2.6679018999999999   |
| H | 6.0207312999999998E-002  | -4.5770940999999998 | -0.10874375999999999 | O | 5.1193071999999997       | -2.3147616000000002  | 0.8974188499999999   |
| H | -1.2151367000000000      | -4.9785599999999999 | 0.43973247999999998  | H | 5.5622094000000004       | -3.0126069000000002  | 1.3589382999999999   |
| O | 1.5025162000000001       | -3.1353868999999999 | -2.0793691000000001  | H | 5.2169534000000004       | -1.5796892000000000  | 1.4759268000000001   |
| H | 1.1715229000000000       | -4.0312824999999997 | -2.4476779999999998  | C | 0.17798745E+01           | -0.30190749E+01      | 0.25447503E+01       |
| H | 1.7414871000000001       | -3.3934929999999999 | -1.1821386000000000  | O | 0.20209967E+01           | -0.17552040E+01      | 0.30932571E+01       |
| O | -1.3990710000000000      | -5.9439152000000002 | 1.8488937999999999   | C | 0.21746883E+01           | -0.80904572E+00      | 0.21102091E+01       |
| H | -0.45852133000000000     | -6.1608798000000000 | 1.8123221000000000   | O | 0.19335830E+01           | -0.14866855E+01      | 0.84211068E+00       |
| H | -1.8063077999999999      | -6.7633777000000004 | 2.2164411999999998   | C | 0.17979276E+01           | -0.29544946E+01      | 0.11480922E+01       |
| O | 1.7198446999999999       | -4.0002849999999999 | 6.3073610000000002   | O | 0.20266871E+01           | -0.13659203E+01      | 0.42972558E+01       |
| H | 1.5963609000000001       | -4.9515982000000003 | 6.5013893999999999   | C | 0.63508804E+00           | -0.91561634E+00      | 0.27865067E+00       |
| H | 1.5221150100000001       | -3.8946570999999999 | 5.3799219999999996   | O | -0.42603727E+00          | -0.1126841E+01       | 0.1126841E+01        |
| O | 5.8221593000000000       | -3.9871903000000000 | 2.7131788000000001   | O | 1.7146034999999999       | -3.9769670000000001  | 0.37158436000000000  |
| H | 5.2636605000000003       | -4.3779566000000001 | 2.0198018000000002   | H | 1.7280072000000000       | -4.0895935000000003  | 3.3276740000000000   |
| H | 5.6266540000000003       | -4.6116602000000002 | 3.4451670999999999   | C | 0.56422637E+00           | 0.60806594E+00       | 0.18850991E+00       |
| O | -0.9888464799999997      | -1.5856160000000001 | 4.2121051999999999   | O | -0.66495894E+00          | 0.10918429E+01       | -0.24186241E+00      |
| H | -0.9220100799999995      | -2.4952250999999999 | 3.8513039000000000   | H | 0.27861576E+01           | -0.13081693E+01      | 0.14706568E+00       |
| H | -4.4427003000000000E-002 | -1.3165102000000000 | 4.2975238999999998   | H | 0.83677155E+00           | 0.94843702E+00       | 0.11489756E+01       |
| O | 4.0676750999999998       | -2.5802147000000000 | 5.4899437000000004   | H | 0.12816731E+01           | 0.10401653E+01       | -0.49141339E+00      |
| H | 3.3960419000000002       | -2.4239652000000000 | 4.8305612000000000   | H | -0.13222610E+01          | 0.95226778E+00       | 0.44987442E+00       |
| H | 3.5558377999999999       | -2.5446468000000002 | 6.3462972000000004   | H | 0.36039137E+00           | -0.13690026E+01      | -0.72591083E+00      |
| O | 4.2739763999999996       | -3.4304334000000001 | -1.7955140000000001  | H | -0.19614395E+00          | -0.79932995E+00      | 0.20281772E+01       |
| H | 3.4793270999999999       | -3.1886356999999999 | -1.3387370000000001  | O | 1.5078925000000001       | -6.2830807000000002  | 1.5931242999999999   |
| H | 4.9270569000000002       | -3.0634698000000000 | -1.1800044000000001  | H | 1.5205815000000000       | -5.6219565999999999  | 2.3441038000000001   |
| C | 0.19891018E+01           | -0.30743361E+01     | 0.26178762E+01       | H | 1.4689878999999999       | -5.6471534999999999  | 0.8628432299999996   |
| C | 0.21068984E+01           | -0.17649864E+01     | 0.31941614E+01       | O | 4.3611801000000003       | -5.7722125000000002  | 1.1059162000000000   |
| O | 0.20825925E+01           | -0.1758500E+01      | 0.21758500E+01       | H | 3.8778503999999998       | -6.4059743999999998  | 1.5856363000000000   |
| C | 0.19357054E+01           | -0.14375389E+01     | 0.90597785E+00       | H | 3.5675905999999999       | -5.4064876999999996  | 0.69741110999999995  |
| C | 0.18610834E+01           | -0.29280509E+01     | 0.12449310E+01       | O | 4.0309245000000002       | -5.3141990999999997  | 4.2847879000000004   |
| O | 0.19898449E+01           | -0.13626141E+01     | 0.43964929E+01       | H | 4.1232819000000003       | -4.5437273999999999  | 4.9059027000000004   |
| C | 0.63862999E+00           | -0.91724563E+00     | 0.28846088E+00       | H | 3.3136036000000000       | -4.8941844999999997  | 3.6986150000000002   |
| O | -0.51322062E+00          | -0.14053607E+01     | 0.94281960E+00       | O | -0.84345141000000001     | -4.5422368000000004  | 4.1216704000000002   |
| O | 1.7012138999999999       | -3.8545080000000000 | 0.4014572399999999   | H | 0.14414803000000001      | -4.5137223000000004  | 3.9368470000000002   |
| O | 1.7483630999999999       | -4.1811577000000000 | 3.3997738000000002   | H | -1.1423349999999999      | -5.0838865999999996  | 3.3802805000000000   |
| C | 0.55174091E+00           | 0.59082891E+00      | 0.20468054E+00       | O | -0.1864990000000000      | -4.7041019999999998  | -0.5923116499999997  |
| O | -0.73533610E+00          | 0.10818731E+01      | -0.24396167E+00      | H | -0.1601804699999999      | -4.5509380000000004  | -0.24435602000000001 |
| H | 0.27536554E+01           | -0.11813502E+01     | 0.28222142E+00       | H | -1.4592536000000000      | -4.9351948999999999  | 0.2775889699999999   |
| H | 0.86352549E+00           | 0.11166724E+01      | 0.11171023E+01       | O | 1.8835957000000001       | -3.3072783000000001  | -2.2713567000000001  |
| H | 0.13056229E+01           | 0.92797063E+00      | -0.58188451E+00      | H | 1.4755275000000001       | -4.1832975000000001  | -2.6389014000000000  |
| H | -0.13226078E+01          | 0.11622174E+01      | 0.52004679E+00       | H | 1.8495352000000000       | -3.4904237999999999  | -1.3083678000000001  |
| H | 0.62374301E+00           | -0.13844279E+01     | -0.72365207E+00      | O | -1.3017584000000000      | -6.2454454000000004  | 1.8190065000000000   |
|   |                          |                     |                      | H | -0.42677254999999997     | -6.5462949999999999  | 1.7874435000000000   |

|   |                          |                     |                     |   |                          |                     |                      |
|---|--------------------------|---------------------|---------------------|---|--------------------------|---------------------|----------------------|
| H | -1.7104189000000001      | -7.0571834000000004 | 2.2650163000000001  | C | 0.19413981E+01           | -0.29579348E+01     | 0.12286550E+01       |
| O | 5.0086550000000001       | -2.1726860000000001 | 0.7901748899999999  | O | 0.21197456E+01           | -0.14492124E+01     | 0.42952678E+01       |
| H | 5.0858014000000002       | -2.8675206000000002 | 1.4357529999999999  | C | 0.69644683E+00           | -0.29084299E+00     | 0.29084299E+00       |
| H | 5.0638679000000000       | -1.4025760000000000 | 1.4011613000000001  | O | -0.43380498E+00          | -0.13782493E+01     | 0.10766495E+01       |
| O | 1.9016933000000000       | -4.0838821999999997 | 6.4897166000000004  | O | 1.9209162000000000       | -3.8433218000000000 | 0.3116314600000003   |
| H | 1.6165233000000001       | -5.0128924000000001 | 6.6820494000000004  | O | 0.8143966000000000       | -4.2150157999999998 | 3.3053197000000001   |
| H | 1.8911270000000000       | -4.0616887999999998 | 5.5102905000000000  | C | 0.64250825E+00           | 0.54772258E+00      | 0.35800261E-01       |
| O | -0.9526890000000001      | -1.8168154000000001 | 4.1757460000000002  | O | -0.62952699E+00          | 0.96511942E+00      | -0.52454047E+00      |
| H | -1.1131161999999999      | -2.7700694000000001 | 3.9197660000000001  | H | 0.27922075E+01           | -0.11633513E+01     | 0.24026814E+00       |
| H | -2.5388924000000002E-003 | -1.8073312199999996 | 4.3323121999999996  | H | 0.83010525E+00           | 0.10812296E+01      | 0.10155683E+01       |
| O | 1.3182343999999999       | -8.7127847999999997 | 2.4115058000000000  | H | 0.14732527E+01           | 0.78823043E+00      | -0.65019383E+00      |
| H | 1.6375587000000000       | -7.9493825999999999 | 1.9553471000000000  | H | -0.12075637E+01          | 0.12590655E+01      | 0.25470132E+00       |
| H | 2.1105255999999999       | -9.2276197999999994 | 2.5580471999999999  | H | 0.46250176E+00           | -0.14886926E+01     | -0.66093572E+00      |
| O | 4.2581638000000002       | -2.6832609999999999 | 5.4600499999999998  | H | -0.24693170E+00          | -0.11735759E+01     | 0.20567078E+01       |
| H | 3.7401039599999998       | -2.3401622999999998 | 5.0966956000000003  | O | 1.5965623000000000       | -6.2611578000000003 | 1.4710847000000000   |
| H | 4.0189959000000002       | -2.8616494000000001 | 6.3847446999999997  | H | 1.3760136999999999       | -6.0635697000000004 | 2.4358711999999998   |
| C | 0.18376995E+01           | -0.31244370E+01     | 0.24873294E+01      | H | 1.6178233000000000       | -5.3308475999999999 | 1.1009245999999999   |
| C | 0.19137574E+01           | -0.18104579E+01     | 0.30616964E+01      | O | 4.2304668000000003       | -5.6443227000000000 | 1.0172601999999999   |
| O | 0.20461331E+01           | -0.84161239E+00     | 0.20888809E+01      | H | 3.5048992000000001       | -6.1137378000000000 | 1.4750998000000000   |
| C | 0.18942010E+01           | -0.14712227E+01     | 0.77298847E+00      | H | 3.6554509999999998       | -4.8584709000000004 | 0.77172308999999994  |
| C | 0.18622574E+01           | -0.29461945E+01     | 0.10970008E+01      | O | -0.61959213999999996     | -4.9316357000000002 | -0.44153734000000000 |
| O | 0.17709279E+01           | -0.13937619E+01     | 0.42126700E+01      | H | 0.20627460000000000      | -4.5222198000000002 | -0.14048081000000001 |
| C | 0.56081707E+00           | -0.89530960E+00     | 0.21533416E+00      | H | -0.484985047000000002    | -5.3855890000000004 | 0.35291618000000002  |
| O | -0.53893223E+00          | -0.12679537E+01     | 0.10042009E+01      | O | 3.9144467000000001       | -5.4620020999999997 | 4.3932729000000004   |
| O | 1.7538975999999999       | -3.8092766000000000 | 0.1079109699999999  | H | 4.1859089000000003       | -4.5775769000000004 | 4.7463857000000003   |
| O | 1.6613789999999999       | -4.2378178999999996 | 3.2282006000000001  | H | 3.0247226999999999       | -5.1800242000000002 | 4.0524202000000002   |
| C | 0.55231771E+00           | 0.58970849E+00      | 0.80292562E-01      | O | -0.85675323999999997     | -4.7872918999999996 | 4.0703101000000004   |
| O | -0.75211469E+00          | 0.10884975E+01      | -0.31820307E+00     | H | 0.12918653999999999      | -4.7878448999999996 | 3.9156976999999999   |
| H | 0.26800095E+01           | -0.11526258E+01     | -0.30955298E-02     | H | -1.1696897999999999      | -5.2999855000000000 | 3.3304288999999998   |
| H | 0.80569316E+00           | 0.10389390E+01      | 0.10515172E+01      | O | 1.7878543000000000       | -3.4872570999999999 | -2.3374416999999998  |
| H | 0.13136422E+01           | 0.86770182E+00      | -0.65825373E+00     | H | 1.5423473999999999       | -4.4043961999999999 | -2.4688382000000000  |
| H | -0.14142582E+01          | 0.91616375E+00      | 0.42003396E+00      | H | 1.8766883000000001       | -3.6084798000000000 | -1.3437778000000000  |
| H | 0.47358832E+00           | -0.14112043E+01     | 0.74277409E+00      | O | 1.7180572999999999       | -3.8566406000000000 | 6.2499237000000001   |
| H | -0.45449835E+00          | -0.11529329E+01     | 0.19758217E+01      | H | 1.8146154499999999       | -4.7908141000000004 | 6.6429723000000003   |
| O | 1.3039972000000000       | -6.2259772000000000 | 1.2149178000000000  | H | 1.7821400999999999       | -4.0287584000000001 | 5.2700467000000000   |
| H | 1.5163542999999999       | -5.6307372999999998 | 1.9831365999999999  | O | 5.9111786999999998       | -3.9369215999999998 | 2.5381648999999999   |
| H | 1.3898862000000001       | -5.5312846000000002 | 0.5595666999999997  | H | 5.3960701000000002       | -4.5644587000000003 | 1.9860399000000000   |
| O | 4.2737143000000000       | -5.2734516999999999 | 0.9942380499999998  | H | 6.2027200000000002       | -4.4974324000000001 | 3.2861096000000001   |
| H | 3.7718907000000002       | -5.9754231999999998 | 1.3209795000000000  | O | 2.3583715999999999       | -6.8015160000000003 | -1.6406050999999999  |
| H | 3.6387706999999998       | -4.6909368999999996 | 0.5915053099999995  | H | 2.2260620000000002       | -6.6076689999999996 | -0.70709807999999996 |
| O | -0.79073194000000002     | -4.7332646000000000 | -0.5502924099999995 | H | 1.4396773000000000       | -6.7151334000000000 | -1.9931601000000001  |
| H | 7.7430698000000006E-002  | -4.4274151000000002 | -0.2725847699999998 | O | -0.78499322000000005     | -2.0164053000000002 | 4.4016843000000003   |
| H | -1.0281830999999999      | -5.2301538000000001 | 0.2637115099999998  | H | -0.93225230999999997     | -2.9449540999999999 | 4.0639365999999999   |
| O | -0.9994286399999998      | -4.6148511000000001 | 4.0131698000000000  | H | -2.1075696000000001E-002 | -2.0046867000000002 | 4.9861000000000004   |
| H | -8.7097292000000007E-002 | -4.3818399000000001 | 3.8008910000000000  | O | 1.5158357000000000       | -8.6546512999999994 | 2.8374560999999998   |
| H | -1.1814559000000000      | -5.2573183999999999 | 3.3175252000000000  | H | 1.5564295800000000       | -7.8927304999999999 | 2.2063149000000002   |
| O | 3.9564528999999999       | -5.2487218000000002 | 4.3997380000000001  | H | 2.4725443000000000       | -8.8308324999999996 | 3.0283121999999998   |
| H | 4.2658044999999998       | -5.1277563000000002 | 4.7062511000000002  | O | 4.1391270999999996       | -7.8057857999999996 | 3.3421322000000000   |
| H | 3.1137982000000002       | -4.3005959999999999 | 3.8955898000000002  | H | 3.9674589000000000       | -6.8596735000000004 | 3.6707874000000000   |
| O | 1.9266065999999999       | -3.5037937000000001 | -2.4016047999999999 | H | 5.1046646999999998       | -7.8250089999999997 | 3.4524284999999999   |
| H | 1.4122155999999999       | -4.3442381000000001 | -2.4137464000000000 | C | 0.17778320E+01           | -0.29799901E+01     | 0.25774516E+01       |
| H | 1.9968048000000000       | -3.4259970000000002 | -1.4041215000000000 | C | 0.19140873E+01           | -0.16901018E+01     | 0.32218179E+01       |
| O | 2.5592226000000000       | -6.5591818000000002 | -1.3809501000000000 | O | 0.21506295E+01           | -0.69243550E+00     | 0.21750956E+01       |
| H | 2.1251978000000000       | -6.3318593999999999 | -0.5147689800000004 | C | 0.19593282E+01           | -0.13509738E+01     | 0.81283132E+00       |
| H | 1.7297429000000000       | -6.4229801000000002 | -1.9813012000000001 | O | 0.19702065E+01           | -0.28203902E+01     | 0.11878717E+01       |
| O | -1.3855409999999999      | -6.2849588000000001 | 1.7221508999999999  | C | 0.20955142E+01           | -0.14020376E+01     | 0.43881743E+01       |
| H | -0.5076913300000000      | -6.6856859999999996 | 1.5600814999999999  | O | 0.60780192E+00           | -0.95014263E+00     | 0.24618305E+00       |
| H | -1.8422962000000001      | -7.1135720999999998 | 2.0176878000000000  | O | -0.41475622E+00          | -0.11029402E+01     | 0.11692500E+01       |
| O | 1.7378127000000001       | -3.9147612999999999 | 6.3472930999999999  | O | 2.0500555999999999       | -3.8311066000000000 | 0.29960006000000000  |
| H | 1.9867897999999999       | -4.7251902000000001 | 6.7691036000000002  | O | 1.7877023000000001       | -4.1448594999999999 | 3.2866829000000002   |
| H | 1.9158767999999999       | -4.1138871000000004 | 5.4015715999999996  | C | 0.61718239E+00           | 0.57780299E+00      | -0.11874128E+00      |
| O | 6.1844561000000002       | -4.0129523999999996 | 2.5594092000000002  | O | -0.73192403E+00          | 0.90910528E+00      | -0.59909790E+00      |
| H | 5.4840742999999996       | -4.5460295999999998 | 2.0638030000000001  | H | 0.27343401E+01           | -0.10533610E+01     | 0.12370927E+00       |
| H | 6.1305636000000003       | -4.4038478000000003 | 3.4437410000000002  | H | 0.97904707E+00           | 0.12620795E+01      | 0.62250722E+00       |
| O | 1.4529231000000000       | -8.6936251999999996 | 2.6798947000000002  | H | 0.13344884E+01           | 0.68563130E+00      | -0.98557532E+00      |
| H | 1.5317818000000001       | -7.8587850000000001 | 2.1395786999999999  | H | -0.12247871E+01          | 0.12874996E+01      | 0.16426232E+00       |
| H | 2.3459962999999999       | -8.7808282000000002 | 3.0990229000000000  | H | 0.44706099E+00           | -0.15688951E+01     | -0.64117958E+00      |
| O | 4.2555674999999997       | -2.4593870999999998 | 5.2368284000000003  | H | -0.22555599E+00          | -0.18437782E+01     | 0.17369620E+01       |
| H | 3.3634848000000002       | -2.3670865999999999 | 4.8871244000000003  | O | 1.4384950000000001       | -6.2893182999999997 | 1.2409363000000000   |
| H | 4.1550661000000000       | -2.1028231000000002 | 6.1507367000000004  | H | 1.4325551000000001       | -5.9676859999999996 | 2.1254786000000001   |
| C | 0.18849973E+01           | -0.31266583E+01     | 0.26027870E+01      | H | 1.6445434999999999       | -5.4871461000000004 | 0.75419066999999995  |
| C | 0.21067717E+01           | -0.17878803E+01     | 0.31381179E+01      | O | 4.3338698999999998       | -5.3960239999999997 | 0.96992005000000003  |
| O | 0.22179083E+01           | -0.76129564E+00     | 0.21326528E+01      | H | 3.8415105000000001       | -6.0024858999999999 | 1.5366740999999999   |
| C | 0.19927574E+01           | -0.15007665E+01     | 0.84275431E+00      | H | 3.6080518000000001       | -4.9290101000000002 | 0.53772677000000002  |
|   |                          |                     |                     | O | -0.41845205000000002     | -4.8287882000000000 | -0.33381094000000000 |

|   |                      |                      |                          |   |                      |                      |                      |
|---|----------------------|----------------------|--------------------------|---|----------------------|----------------------|----------------------|
| H | 0.39456424000000001  | -4.3495417999999999  | 6.1612979999999998E-002  | H | 2.3342217999999999   | -6.8204507000000003  | -0.65917643000000004 |
| H | -0.79940146999999995 | -5.3669864000000000  | 0.42797395999999999      | H | 1.7232235000000000   | -7.0760078999999996  | -2.0068514000000000  |
| O | -0.62120180999999997 | -5.11290789999999997 | 3.95098730000000000      | O | -0.65692159999999999 | -2.3069630000000001  | 4.7010835000000002   |
| H | 0.293502050000000001 | -4.87082109999999997 | 3.66386390000000000      | H | -0.73793196000000005 | -3.1663285999999999  | 4.2630575999999998   |
| H | -0.76422427999999998 | -5.47184579999999996 | 3.0732159999999999       | H | 0.31074813000000001  | -2.2238001999999999  | 4.6640793000000000   |
| O | 4.15296299999999999  | -5.30718509999999999 | 4.56115880000000003      | O | 4.12396299999999998  | -2.8152181999999999  | 5.5931176000000002   |
| H | 4.55009559999999997  | -4.53861679999999998 | 4.97752019999999998      | H | 3.36410650000000001  | -2.4350257999999999  | 5.1622807599999996   |
| H | 3.41908200000000000  | -4.96680580000000004 | 4.00071249999999997      | H | 3.98568079999999999  | -2.3907075999999998  | 6.4279862000000003   |
| O | 2.08219470000000001  | -3.32088330000000002 | -2.27803170000000001     | C | 0.19524672E+01       | -0.30067442E+01      | 0.26026166E+01       |
| H | 1.40923669999999999  | -3.96195599999999998 | -2.57624340000000001     | C | 0.20091190E+01       | -0.17152189E+01      | 0.31266408E+01       |
| H | 2.11943830000000001  | -3.54482119999999999 | -1.28391530000000001     | O | 0.19467391E+01       | -0.76563869E+00      | 0.21034360E+01       |
| O | 1.63578350000000001  | -3.99748640000000001 | 6.00552729999999998      | C | 0.16825424E+01       | -0.14489877E+01      | 0.88018457E+00       |
| H | 2.04313820000000000  | -4.80423509999999996 | 6.36278870000000003      | C | 0.17597645E+01       | -0.28830590E+01      | 0.12024833E+01       |
| H | 1.68029640000000000  | -4.14907999999999997 | 4.99597640000000000      | O | 0.20955333E+01       | -0.12454968E+01      | 0.43206392E+01       |
| O | 5.89590690000000000  | -3.69181649999999998 | 2.40872220000000001      | C | 0.25306435E+00       | -0.10812428E+01      | 0.32683048E+00       |
| H | 5.44858650000000002  | -4.27695139999999997 | 1.79960790000000000      | O | -0.71517894E+00      | -0.15092775E+01      | 0.13120642E+01       |
| H | 6.34519439999999996  | -4.29349579999999996 | 2.99081049999999998      | O | 0.70440309999999999  | -3.83032650000000000 | 0.34344054000000002  |
| O | -0.79116861000000005 | -2.28755530000000002 | 4.73334700000000002      | O | 0.15882499999999999  | -4.10279469999999996 | 3.32146360000000000  |
| H | -0.73009539999999999 | -3.13862739999999999 | 4.34723490000000001      | C | 0.26467064E+00       | 0.44547754E+00       | 0.15032379E+00       |
| H | 0.17276908999999999  | -2.18270820000000000 | 4.83230010000000003      | O | -0.91570912E+00      | 0.98072130E+00       | -0.52199885E+00      |
| O | 4.20287309999999997  | -7.70860200000000003 | 3.13412930000000001      | H | 0.24023398E+01       | -0.10748232E+01      | 0.12480821E+00       |
| H | 4.15985850000000003  | -6.81193999999999999 | 3.59254490000000000      | H | 0.34165597E+00       | 0.93243690E+00       | 0.11307589E+01       |
| H | 5.09114419999999996  | -7.99269050000000001 | 3.39994860000000001      | H | 0.11489340E+01       | 0.68247227E+00       | -0.45581294E+00      |
| O | 5.15183660000000002  | -1.69812380000000001 | 0.50834811000000002      | H | -0.13679037E+01      | 0.16559314E+01       | 0.27935995E-01       |
| H | 5.55361249999999998  | -2.38994720000000001 | 1.02343699999999999      | H | 0.78343667E-01       | -0.15969637E+01      | -0.63884900E+00      |
| H | 5.04399730000000000  | -0.95534190000000000 | 1.10654959999999999      | H | -0.25713310E+00      | -0.22117071E+01      | 0.17774756E+01       |
| O | 2.10622560000000001  | -7.49731259999999999 | -1.60609509999999999     | O | 1.67962340000000001  | -6.24738799999999999 | 1.59199640000000000  |
| H | 1.56196549999999999  | -7.11514850000000001 | -0.87763860999999999     | H | 1.74924640000000001  | -5.74415060000000002 | 2.42147399999999999  |
| H | 1.79390720000000000  | -6.90796100000000004 | -2.31921199999999998     | H | 1.46654679999999999  | -5.40367290000000001 | 1.12264480000000000  |
| C | 0.19784485E+01       | -0.30599644E+01      | 0.25823416E+01           | O | -0.71758438000000002 | -4.42633822999999998 | 3.49338229999999999  |
| C | 0.19661840E+01       | -0.17926298E+01      | 0.32260330E+01           | H | 0.27305858000000000  | -4.37912250000000003 | 3.38442110000000000  |
| O | 0.18099115E+01       | -0.81659943E+00      | 0.22375835E+01           | H | -0.88533994999999999 | -5.09728859999999997 | 2.83562290000000002  |
| C | 0.18462337E+01       | -0.13853940E+01      | 0.92748060E+00           | O | -0.50504730000000000 | -4.89546469999999999 | -0.52537792000000005 |
| C | 0.19792006E+01       | -0.28933122E+01      | 0.12145260E+01           | H | 0.31543584000000002  | -4.52964029999999996 | -0.31417949000000001 |
| O | 0.19884045E+01       | -0.14239969E+01      | 0.44150748E+01           | H | -0.77850459000000005 | -5.32384240000000002 | 0.33044994999999999  |
| C | 0.57163423E+00       | -0.93430278E+00      | 0.13117802E+00           | O | 4.55515570000000003  | -5.23530069999999998 | 0.88318823000000002  |
| O | -0.6186861E+00       | -0.1308256E+01       | 0.8950473E+00            | H | 3.83256659999999998  | -5.71176010000000002 | 1.27644880000000001  |
| O | 2.08084479999999999  | -3.83289280000000002 | 0.31058097000000001      | H | 4.07637840000000003  | -4.60688649999999999 | 0.35966724000000000  |
| O | 1.99640719999999999  | -4.19909420000000002 | 3.29502410000000000      | O | 4.28877440000000003  | -5.23206650000000002 | 4.23265520000000000  |
| C | 0.46833873E+00       | 0.57336063E+00       | 0.87326659E-01           | H | 4.45361780000000000  | -4.45361780000000000 | 4.79664320000000001  |
| O | -0.73190660E+00      | 0.10291057E+01       | -0.57374634E+00          | H | 3.43933519999999999  | -5.06583299999999996 | 3.76115099999999999  |
| H | 0.27062826E+01       | -0.10050495E+01      | 0.37241589E+00           | O | 2.11265819999999998  | -3.60072370000000001 | -2.28250040000000000 |
| H | 0.51493645E+00       | 0.10908921E+01       | 0.10421975E+01           | H | 1.54440120000000000  | -4.35165009999999996 | -2.50170830000000002 |
| H | 0.11513559E+01       | 0.10686357E+01       | -0.55799499E+00          | H | 2.00231989999999998  | -3.58747619999999998 | -1.29957530000000001 |
| H | -0.13571733E+01      | 0.12187998E+01       | 0.17553717E+00           | O | 1.11198720000000000  | -4.12539020000000002 | 5.95724060000000004  |
| H | 0.45179523E+00       | -0.13811926E+01      | -0.86832495E+00          | H | 1.72762560000000001  | -4.69890899999999996 | 6.38283839999999998  |
| H | -0.35771875E+00      | 0.20133589E+01       | 0.15896013E+01           | H | 1.58524630000000000  | -4.13494630000000002 | 5.07184279999999998  |
| O | 1.41436110000000000  | -6.30460520000000001 | 1.76110309999999999      | O | -0.86653723999999999 | -1.97082500000000000 | 4.54388729999999997  |
| H | 1.63449979999999999  | -5.82039750000000003 | 2.60412419999999998      | H | -0.94913289000000001 | -2.87073499999999998 | 4.22375349999999999  |
| H | 1.54565910000000000  | -5.56319870000000001 | 1.15096859999999999      | H | 0.10278915000000000  | -1.93582000000000001 | 4.71052699999999999  |
| O | 4.34351860000000003  | -5.36812389999999996 | 0.92414204000000000      | O | 1.29068820000000000  | -8.60639869999999997 | 2.80097890000000000  |
| H | 3.86758140000000002  | -5.64338500000000003 | 1.75537290000000000      | H | 1.45196370000000001  | -7.74104130000000000 | 2.35221709999999998  |
| H | 3.65192020000000002  | -4.86176009999999997 | 0.48260626000000001      | H | 2.18221340000000002  | -8.96296060000000006 | 2.93162289999999998  |
| O | -0.68895355000000003 | -5.00966359999999997 | 3.74730369999999998      | O | 6.34789569999999996  | -3.85153850000000002 | 2.28601669999999998  |
| H | 0.27037793999999998  | -4.98838709999999997 | 3.59167820000000000      | H | 5.75269199999999997  | -4.55439520000000001 | 1.93269289999999999  |
| H | -0.92915614000000002 | -5.42662200000000001 | 2.86588960000000000      | H | 6.91712590000000003  | -4.38435210000000001 | 2.90895670000000001  |
| O | -0.59059877999999999 | -4.64962620000000002 | -0.42003691999999998     | O | -1.50346180000000000 | -6.37519339999999997 | 1.67057380000000001  |
| H | 0.10843915000000000  | -4.13188099999999999 | -8.7743507999999998E-002 | H | -1.21345989999999999 | -7.19251970000000001 | 1.15669629999999999  |
| H | -0.93001243000000000 | -5.05554759999999997 | 0.42037382000000001      | H | -2.29706959999999999 | -6.75709909999999996 | 2.15413130000000000  |
| O | 4.09444718000000000  | -5.39994770000000001 | 4.56965459999999998      | O | 5.58096179999999999  | -1.87819819999999999 | 0.53458580000000000  |
| H | 4.43807240000000003  | -4.59716249999999996 | 5.05668040000000003      | H | 5.71053030000000003  | -2.65862169999999999 | 1.05689579999999999  |
| H | 3.39287599999999998  | -4.86746799999999997 | 3.99246480000000000      | H | 5.76757899999999996  | -1.17620520000000001 | 1.16987050000000000  |
| O | 2.10377940000000001  | -3.78222639999999999 | -2.32836929999999999     | C | 0.20488391E+01       | -0.30105812E+01      | 0.25452406E+01       |
| H | 1.63339729999999999  | -4.61116189999999999 | -2.71894610000000001     | O | 0.18711730E+01       | -0.16873244E+01      | 0.31063182E+01       |
| H | 2.22531390000000002  | -4.03412469999999996 | -1.42221479999999999     | O | 0.18689546E+01       | -0.71646194E+00      | 0.21186544E+01       |
| O | 1.38952380000000001  | -4.09365830000000004 | 6.04334650000000002      | C | 0.17272650E+01       | -0.13648316E+01      | 0.88115431E+00       |
| H | 1.61240589999999999  | -5.04162019999999997 | 5.83188510000000000      | O | 0.19257920E+01       | -0.28449966E+01      | 0.11052007E+01       |
| H | 1.43807829999999999  | -3.78487699999999998 | 5.08605739999999996      | O | -0.17291290E+01      | -0.13910113E+01      | 0.42865796E+01       |
| O | 5.07245480000000000  | -1.72224890000000001 | 0.53649396999999999      | C | 0.37936022E+00       | -0.10758965E+01      | 0.29228315E+00       |
| H | 5.15917829999999998  | -2.51709020000000002 | 1.03869430000000000      | O | -0.70322582E+00      | -0.16007716E+01      | 0.10323570E+01       |
| H | 4.97374920000000003  | -1.08146389999999999 | 1.23535180000000001      | O | 1.87059950000000000  | -3.68151780000000000 | 0.16863288000000001  |
| O | 5.80785790000000001  | -3.63149729999999999 | 2.45851800000000002      | O | 1.92294349999999999  | -4.14130209999999999 | 3.19427920000000000  |
| H | 5.62044669999999996  | -4.36752870000000003 | 1.83460980000000000      | C | 0.10815830E+00       | 0.41203510E+00       | -0.23802270E-01      |
| H | 6.36098870000000001  | -4.15522110000000003 | 3.11274950000000001      | O | -0.12484575E+01      | 0.60208890E+00       | -0.51510830E+00      |
| O | 2.54228530000000001  | -7.17786409999999999 | -1.55503370000000001     |   |                      |                      |                      |

|   |                         |                     |                         |   |                          |                     |                          |
|---|-------------------------|---------------------|-------------------------|---|--------------------------|---------------------|--------------------------|
| H | 0.24942751E+01          | -0.89651411E+00     | 0.28314972E+00          | O | 1.3011874999999999       | -3.5295347000000001 | -2.5962393000000001      |
| H | 0.25829266E+00          | 0.98315040E+00      | 0.90285515E+00          | H | 1.7975482000000000       | -4.2291859000000001 | -3.0205858000000001      |
| H | 0.79238980E+00          | 0.71818822E+00      | -0.83595961E+00         | H | 1.5844410000000000       | -3.7011569000000000 | -1.6694061000000000      |
| H | -0.17324011E+01         | 0.64671069E+00      | 0.33233247E+00          | O | 4.3691104000000003       | -2.8931613000000000 | -1.7959001000000001      |
| H | 0.30376280E+00          | -0.14609537E+01     | -0.77034050E+00         | H | 3.4843975000000000       | -2.9663963999999998 | -1.3797721699999999      |
| H | -0.55652115E+00         | -0.18359878E+01     | 0.19670847E+01          | H | 4.7996477999999998       | -2.3088370000000001 | -1.0492473000000000      |
| O | 1.7869428000000001      | -6.1175392999999998 | 1.4206858000000000      | O | 1.5760399000000000       | -4.0254234000000002 | 5.9728359999999998       |
| H | 1.7676706000000000      | -5.5809432000000001 | 2.2941028000000001      | H | 2.2787513000000001       | -4.6738423999999998 | 6.0120706999999998       |
| H | 1.7125652000000000      | -5.3696541000000000 | 0.8055197100000000      | H | 1.7010825000000001       | -3.6779329000000001 | 5.0528145000000002       |
| O | 4.3160211000000004      | -5.2820755999999998 | 0.7833895199999995      | O | 6.2392092999999997       | -3.9410512999999998 | 1.5068094000000001       |
| H | 3.7994835999999998      | -5.9630141999999999 | 1.2921440000000000      | H | 5.5720659000000001       | -4.6448342000000000 | 1.2460667000000001       |
| H | 3.6925889000000001      | -4.6038474000000003 | 0.6365556700000002      | H | 7.0495624000000001       | -4.4729934000000000 | 1.6454196000000001       |
| O | -0.7742033600000001     | -4.3498625999999998 | 3.4161698999999999      | O | 1.2562875000000000       | -8.5944725000000002 | 2.6137616000000001       |
| H | 0.21222041999999999     | -4.3893436000000001 | 3.2626769000000002      | H | 1.3321700000000001       | -7.6749710000000002 | 2.3076607999999998       |
| H | -1.0809169000000001     | -4.9963476000000000 | 2.6911097000000002      | H | 2.2092459999999998       | -8.3479810000000004 | 2.4956250000000000       |
| O | -0.64315193000000004    | -4.8837535000000001 | -0.62174757000000003    | O | 5.0568692999999998       | -1.7241560000000000 | 0.5316410499999995       |
| H | 0.16110030000000000     | -4.3493943000000002 | -0.3428513899999998     | H | 5.5473179999999997       | -2.4183346000000001 | 1.0344590000000000       |
| H | -0.82417916999999996    | -5.3445286999999997 | 0.16753024999999999     | H | 5.1753530000000004       | -1.0274639000000001 | 1.1519210000000000       |
| O | 4.1093191999999998      | -5.3154187000000004 | 4.4492194999999999      | O | 4.3466952000000001       | -2.7286738000000001 | 5.3124082000000001       |
| H | 4.4168848000000001      | -4.5213057000000001 | 4.9722451000000003      | H | 3.5221358999999999       | -2.4281337999999999 | 4.8377189999999999       |
| H | 3.4357617999999999      | -4.9541250999999997 | 3.8337813000000001      | H | 4.2263261999999999       | -2.2894630999999999 | 6.1643638000000003       |
| O | 1.4816604000000000      | -4.2101854000000004 | 5.9173458999999999      |   |                          |                     |                          |
| H | 1.9082020000000000      | -4.9726439999999998 | 5.8966079000000002      | C | 0.17716282E+01           | -0.31085317E+01     | 0.25080918E+01           |
| H | 1.4360253999999999      | -4.0186038999999996 | 5.0168843000000001      | C | 0.19673800E+01           | -0.17641130E+01     | 0.30062814E+01           |
| O | 1.6567156999999999      | -3.5895492000000000 | -2.6347361000000000     | O | 0.18598245E+01           | -0.78695702E+00     | 0.19076187E+01           |
| H | 1.9717914999999999      | -4.4483752000000001 | -2.8401692999999999     | C | 0.16728326E+01           | -0.15563914E+01     | 0.68430569E+01           |
| H | 1.6241889000000000      | -3.5391211000000000 | -1.6683938000000000     | C | 0.17093468E+01           | -0.29622094E+01     | 0.10958747E+01           |
| O | 4.5490101000000003      | -2.7507074999999999 | -1.8728024999999999     | O | 0.21217331E+01           | -0.13374511E+01     | 0.41439634E+01           |
| H | 3.7223036999999999      | -3.1479678999999998 | -1.4805816000000001     | C | 0.24588834E+00           | -0.10676955E+01     | 0.21858956E+01           |
| H | 4.8100348999999998      | -2.0501974000000001 | -1.2222227000000001     | O | -0.86760964E+00          | -0.14634482E+01     | 0.89666156E+00           |
| O | 6.4132994999999999      | -3.8288972999999999 | 1.9529862000000000      | O | 1.7410340000000000       | -3.9669373999999999 | 0.25943089000000003      |
| H | 5.6932543999999998      | -4.3310411000000002 | 1.5016986999999999      | O | 1.9105814000000001       | -4.1891641000000002 | 3.2549427000000000       |
| H | 6.5306831000000001      | -4.3767896999999998 | 2.7641878000000002      | C | 0.14172970E+00           | 0.44028593E+00      | -0.97991209E-01          |
| O | 1.4243163000000001      | -8.7762429000000004 | 2.3814229000000000      | O | -0.11403454E+01          | 0.8878811E+00       | -0.48458678E+00          |
| H | 1.6078725000000000      | -7.8153652999999998 | 2.3140562999999998      | H | 0.25144845E+01           | -0.13886641E+01     | -0.96164742E-01          |
| H | 2.3621911999999998      | -9.1219304999999995 | 2.2843282000000000      | H | 0.34693468E+00           | 0.76525488E+00      | 0.96670554E+00           |
| O | 2.7813843000000000      | -7.1630317000000003 | -1.7111095999999999     | H | 0.81978531E+00           | 0.88179726E+00      | -0.82613949E+00          |
| H | 2.7659373999999999      | -7.0809163000000002 | -0.7582658100000004     | H | -0.17262210E+01          | 0.10669025E+01      | 0.27851241E+00           |
| H | 1.8189789999999999      | -7.2148370999999996 | -1.8771876999999999     | H | 0.19596107E+00           | -0.16306462E+01     | -0.88384067E+00          |
| O | -0.9335643999999996     | -1.8924835000000000 | 4.8410827000000003      | H | -0.49810241E+00          | -0.17530108E+01     | 0.17658723E+01           |
| H | -0.9511336599999999     | -2.7539720000000001 | 4.3921663999999998      | O | 1.3309002999999999       | -6.3790062999999996 | 1.7124831000000000       |
| H | -0.10347495000000000    | -1.4343543999999999 | 4.6641294999999996      | H | 1.5444027000000000       | -5.5410104000000002 | 2.2117385999999999       |
|   |                         |                     |                         | H | 1.6604722999999999       | -5.9973817000000000 | 0.87498014000000002      |
| C | 0.20479927E+01          | -0.31355496E+01     | 0.23186531E+01          | O | 4.1350027999999996       | -5.3129803999999998 | 0.5325255999999995       |
| C | 0.20488609E+01          | -0.18195053E+01     | 0.29371629E+01          | H | 3.7689126000000002       | -5.4210215000000002 | 1.4061802000000001       |
| O | 0.19293460E+01          | -0.79432846E+00     | 0.20156676E+01          | H | 3.4055370000000000       | -4.8018327000000003 | 0.20047867000000000      |
| C | 0.17300634E+01          | -0.14374759E+01     | 0.65523858E+00          | O | -0.7385633099999997      | -4.5760731999999997 | 3.7759882999999999       |
| C | 0.19976889E+01          | -0.28892551E+01     | 0.96799978E+00          | H | 0.0840000000000000       | -4.5770210000000002 | 3.7798604000000000       |
| O | 0.21738854E+01          | -0.14197811E+01     | 0.41235608E+01          | H | -0.9629837199999999      | -5.2290546999999998 | 3.0638896999999998       |
| C | 0.34602389E+00          | -0.10566862E+01     | 0.18779091E+00          | O | -0.6972867900000000      | -5.1599645000000001 | -0.38671501000000003     |
| O | -0.66471531E+00         | -0.15435868E+01     | 0.10908083E+01          | H | -2.7839645999999999E-002 | -4.5896631000000001 | -4.3057175999999999E-005 |
| O | 1.9984047000000000      | -3.8213271999999998 | 1.7057847000000001E-002 | H | -1.0534673999999999      | -5.5224886000000000 | 0.40943695000000002      |
| O | 2.0477292000000000      | -4.2851657999999997 | 3.0551693000000002      | C | 3.9463433000000001       | -5.4419740000000001 | 4.6768758000000004       |
| C | 0.23607047E+00          | 0.47668498E+00      | -0.96036346E-01         | H | 4.4187352999999998       | -4.5928721000000001 | 4.6566565000000004       |
| O | -0.11063319E+01         | 0.83150606E+00      | -0.45390849E+00         | H | 3.1165818999999999       | -5.0958322999999996 | 4.2428783000000001       |
| H | 0.25573345E+01          | -0.99156345E+00     | 0.80314533E-01          | O | 1.7062359000000000       | -3.7651645999999999 | 5.8646665999999996       |
| H | 0.62938362E+00          | 0.10520768E+01      | 0.78536632E+00          | H | 2.1548729999999998       | -4.6236272999999999 | 5.9898137000000000       |
| H | 0.92067660E+00          | 0.71923694E+00      | -0.87336839E+00         | H | 1.9036276000000001       | -3.6528387000000002 | 4.8610813000000004       |
| H | -0.15942524E+01         | 0.11794949E+01      | 0.32820257E+00          | O | 1.4030739000000001       | -3.4177209000000000 | -2.4740213000000000      |
| H | 0.26657782E-01          | -0.15937119E+01     | -0.71840823E+00         | H | 1.6219242000000000       | -4.3082297000000001 | -2.8080297999999999      |
| H | -0.48868290E+00         | -0.13859554E+01     | 0.20199805E+01          | H | 1.7718902000000001       | -3.5404732000000001 | -1.6288492000000001      |
| O | 1.6549381999999999      | -6.2335390000000004 | 1.0514931000000001      | O | 4.4840821999999996       | -2.6607354000000001 | -1.5109319999999999      |
| H | 1.6455544000000000      | -5.8091108000000000 | 1.9456389000000001      | H | 3.8337564000000000       | -3.1951801000000000 | -1.0628393000000000      |
| H | 1.6451229999999999      | -5.3951171000000002 | 0.5567995799999996      | H | 4.8709959999999999       | -2.1981234000000001 | -0.7292252799999998      |
| O | 4.1924196000000000      | -5.4308182000000000 | 0.38008773000000001     | O | -1.2786225000000000      | -6.6029415000000000 | 1.7542849000000000       |
| H | 3.5537372999999999      | -5.9781557999999997 | 0.89812619000000005     | H | -0.33781576000000002     | -6.9457050999999996 | 1.7930069000000000       |
| H | 3.5281962000000000      | -4.7307326999999999 | 6.4036077999999996E-002 | H | -1.8349553999999999      | -7.3717381000000000 | 2.0506877000000001       |
| O | -0.90214565000000002    | -4.9123628000000004 | -0.29811472000000000    | O | -0.81522095000000006     | -2.0633599000000000 | 4.4915191999999999       |
| H | 2.2338859999999999E-002 | -4.7912455999999999 | 1.9280155000000000E-002 | H | -1.2189565000000000      | -2.9207470000000000 | 4.2209776000000003       |
| H | -1.1300047000000000     | -5.5617634999999996 | 0.41037267999999999     | H | 0.10600479000000000      | -2.3207719000000000 | 4.6883603999999997       |
| O | -0.69221204999999997    | -4.4531942999999998 | 3.7296969000000000      | O | 1.2499994000000001       | -8.8309286999999994 | 2.6817139999999999       |
| H | 0.28432731999999999     | -4.4541792999999998 | 3.6041080000000001      | H | 1.2013342000000000       | -7.8701349000000000 | 2.5235476999999999       |
| H | -0.85154405000000000    | -5.1354591000000003 | 3.0314733999999999      | H | 2.1072079000000001       | -9.0793847000000003 | 2.2141191999999998       |
| O | 4.02729210000000004     | -5.3170191999999998 | 4.4245631000000003      | O | 4.4494549000000001       | -2.7999773000000001 | 5.3107286000000000       |
| H | 4.3907062999999997      | -4.4722505999999997 | 4.6919813000000001      | H | 3.5551629999999999       | -2.5461732000000001 | 5.0634986000000000       |
| H | 3.2727301999999998      | -4.9280118999999996 | 3.8846712000000001      | H | 4.5760857000000001       | -2.3163333000000002 | 6.1265372999999999       |

|   |                      |                     |                          |   |                      |                     |                         |
|---|----------------------|---------------------|--------------------------|---|----------------------|---------------------|-------------------------|
| C | 0.19516266E+01       | -0.30794290E+01     | 0.24351959E+01           | H | 1.7569963000000000   | -5.5089525999999998 | 1.0503226000000001      |
| C | 0.20563588E+01       | -0.1736758E+01      | 0.29260739E+01           | O | 4.3557933000000002   | -5.3586425000000002 | 0.7328910800000003      |
| O | 0.20509963E+01       | -0.79597002E+00     | 0.18869772E+01           | H | 4.1043139999999996   | -5.9328073000000003 | 1.4336894000000000      |
| C | 0.17344035E+01       | -0.15318596E+01     | 0.64071733E+00           | H | 3.5016379999999998   | -4.9495129999999996 | 0.64212599000000004     |
| C | 0.18767828E+01       | -0.29886294E+01     | 0.10146918E+01           | O | -0.37478015999999997 | -5.1934184999999999 | -0.12606670000000000    |
| O | 0.20882927E+01       | -0.13188189E+01     | 0.40806063E+01           | H | 0.30535109999999999  | -4.5499276000000002 | 7.4995529000000005E-002 |
| C | 0.27144694E+00       | -0.12358737E+01     | 0.19267626E+00           | H | -0.37006104999999999 | -5.4697731000000003 | 0.75663292000000004     |
| O | -0.70832582E+00      | -0.13554264E+01     | 0.13061203E+01           | O | -0.85536690999999998 | -4.6655392000000004 | 3.4726420000000000      |
| O | 1.8916143999999999   | -3.9128991000000002 | 0.13201294999999999      | H | 0.10089115000000000  | -4.4031399999999996 | 3.4140953999999999      |
| O | 1.9418023000000000   | -4.1963327000000001 | 3.1594299000000001       | H | -0.90753572000000005 | -5.4084165999999998 | 2.9002669000000001      |
| C | 0.25420180E+00       | -0.26570556E+00     | -0.22632572E+00          | O | 4.1084684999999999   | -5.4885001999999998 | 3.9527530999999998      |
| O | -0.10349340E+01      | 0.73601557E+00      | -0.56937772E+00          | H | 4.43506939999999997  | -4.6318089000000002 | 2.7003579999999996      |
| H | 0.23578728E+01       | -0.11007184E+01     | -0.97656675E-01          | H | 3.1746694999999998   | -5.1913781999999999 | 3.6306845999999999      |
| H | 0.60836426E+00       | 0.79775386E+00      | 0.72139290E+00           | O | 1.5693153000000000   | -3.9732742999999999 | 6.0472579000000000      |
| H | 0.83443342E+00       | 0.39329693E+00      | -0.11323751E+01          | H | 2.2016452000000002   | -4.6731809000000002 | 6.2858074999999998      |
| H | -0.15233491E+01      | 0.10058546E+00      | 0.18209361E+00           | H | 1.6112420000000001   | -4.1008130000000002 | 5.0731739999999999      |
| H | 0.54475260E-02       | -0.19703629E+01     | -0.59391682E+00          | O | 3.7892000000000002   | -2.8078273999999999 | -1.6748719999999999     |
| H | -0.19345351E+00      | -0.17270159E+01     | 0.20519644E+01           | H | 3.4669105999999998   | -3.2246967000000000 | -0.99922162999999997    |
| O | 1.7946215999999999   | -6.2941259000000001 | 1.5432098999999999       | H | 4.6232666000000000   | -2.3399526000000002 | -1.0743830999999999     |
| H | 1.9696199999999999   | -5.6928785000000000 | 2.2442223000000001       | O | 1.2055309999999999   | -3.6783484000000000 | -2.4661719999999998     |
| H | 1.7583705000000001   | -5.5593165999999998 | 0.87520209000000004      | H | 1.4446935999999999   | -4.5796748999999997 | -2.8190016999999998     |
| O | 4.2094434999999999   | -5.4535467999999998 | 0.66373554000000001      | H | 3.6634805499999999   | -3.6634805499999998 | -1.5268459999999999     |
| O | 3.5927506999999999   | -6.0924867999999996 | 1.1212626000000000       | O | 1.1375510000000000   | -8.4536598000000005 | 2.8472987999999999      |
| H | 3.5096631000000000   | -4.8462772999999997 | 0.33625839000000002      | H | 4.4911158000000000   | -7.6307974999999999 | 2.4499187999999998      |
| O | -0.56122402000000005 | -4.6819393000000000 | -0.27976209000000002     | H | 2.0043878999999998   | -8.9461875000000006 | 2.7262021999999999      |
| H | 0.35457077999999997  | -4.6092931999999998 | -5.5147351999999997E-002 | O | -0.63233671000000002 | -2.0259510999999999 | 4.6473306000000001      |
| H | -0.90982118000000001 | -5.3356032999999998 | 0.51648987999999996      | H | -0.63641950999999997 | -2.9991292000000001 | 4.7200129000000004      |
| O | -0.57131536999999999 | -4.6511149999999999 | 3.9412254000000000       | H | 0.32463549000000003  | -1.8432126000000000 | 4.7035049999999998      |
| H | 0.41612669000000002  | -4.5043914000000003 | 3.7516200999999998       | O | 4.2926222999999997   | -2.9269061000000001 | 5.5850815999999996      |
| H | -0.9142126999999999  | -4.9945234999999997 | 3.0575993000000001       | H | 3.3336321999999998   | -2.8265815999999999 | 5.2981670000000003      |
| O | 4.2214555000000002   | -5.3875738999999996 | 4.2708190999999998       | H | 3.4580841000000001   | -2.4252609000000001 | 6.3848001999999999      |
| H | 4.6660507999999998   | -4.6640550999999997 | 4.7622378999999997       | O | 6.4908400999999998   | -3.9061819000000000 | 1.7628691999999999      |
| H | 3.4478770999999999   | -4.8467173900000001 | 3.9905119999999998       | H | 5.8379156999999999   | -4.4606937000000002 | 1.3300517999999999      |
| O | 1.5443781000000001   | -4.0785428000000001 | 6.0157359000000001       | H | 7.1819490000000004   | -4.5494991999999996 | 1.7351182000000001      |
| H | 1.8789126000000000   | -4.9536831000000001 | 6.3035852999999999       | C | 0.19481095E+01       | -0.30234169E+01     | 0.27459011E+01          |
| H | 1.7774669999999999   | -4.0701166000000004 | 5.0351486999999997       | C | 0.19986026E+01       | -0.16396065E+01     | 0.31943352E+01          |
| O | 1.0693382000000000   | -3.5074074000000000 | -2.6018089000000000      | O | 0.20465640E+01       | -0.72065640E+00     | 0.21639429E+01          |
| H | 1.5289476000000000   | -4.1504143999999998 | -3.1512698000000001      | C | 0.18281005E+01       | -0.15042912E+01     | 0.88855912E+00          |
| H | 1.4798707000000000   | -3.6289364000000002 | -1.6948120000000000      | C | 0.18895180E+01       | -0.29792890E+01     | 0.13460817E+01          |
| O | 4.4268422999999997   | -2.8647898999999999 | -1.8061275000000001      | O | 0.19066616E+01       | -0.12019640E+01     | 0.43454957E+01          |
| H | 3.7425231999999999   | -3.2749529999999999 | -1.2718647999999999      | C | 0.49161933E+00       | -0.11535762E+01     | 0.29615846E+00          |
| H | 4.8668100000000001   | -2.2645114999999998 | -1.0851786999999999      | O | -0.59031868E+00      | -0.14370528E+00     | 0.12399795E+01          |
| O | 6.2698055999999998   | -3.9410322999999998 | 1.7501960999999999       | O | 1.9205260000000000   | -3.9480748999999999 | 0.46420091000000002     |
| H | 5.5294509999999999   | -4.5328776000000000 | 1.3732005000000000       | O | 1.8531563000000000   | -4.0565629999999997 | 3.5185514000000002      |
| H | 6.9568973999999999   | -4.5532940999999996 | 1.9028590999999999       | C | 0.30836836E+00       | -0.32583559E+00     | -0.11901900E+00         |
| O | 1.2319722000000000   | -8.5602081999999999 | 3.0732205000000001       | O | -0.10293937E+01      | 0.59857449E+00      | -0.70435568E+00         |
| H | 1.3583158000000000   | -7.7733357999999999 | 2.4678882999999998       | O | 0.26301072E+01       | -0.12567892E+01     | 0.19777225E+00          |
| H | 2.1711581000000000   | -8.6718933000000007 | 3.1963929000000002       | H | 0.48470605E+00       | 0.89643864E+00      | 0.76073632E+00          |
| O | -0.1524605999999999  | -6.5714661999999997 | 1.8822875999999999       | H | 0.9292599E+00        | 0.66970849E+00      | -0.91842563E+00         |
| H | -0.61300849000000002 | -7.0529647999999998 | 1.2181713999999999       | H | -0.16657439E+01      | 0.33318375E+00      | 0.46555037E-01          |
| H | -1.7504245000000000  | -7.2701064999999998 | 2.1348139000000002       | H | 0.42862306E+00       | -0.18144294E+01     | -0.51006188E+00         |
| O | -0.6649549099999995  | -2.1330908000000002 | 4.7890230000000003       | H | -0.12017326E+00      | -0.21211234E+01     | 0.17712751E+01          |
| H | -0.92340312000000002 | -3.0506576000000001 | 4.5840727000000001       | O | 1.5904166000000000   | -6.2659932999999999 | 1.8979790999999999      |
| H | 0.26253240999999998  | -2.2225088999999998 | 4.9378479000000004       | H | 1.7068690000000000   | -5.6314694000000003 | 2.6499451000000001      |
| C | 0.20322237E+01       | -0.30064114E+01     | 0.25833042E+01           | H | 1.6798611999999999   | -5.5750267999999998 | 1.2330544999999999      |
| C | 0.20875884E+01       | -0.17096825E+01     | 0.30580536E+01           | O | 4.2132842000000004   | -5.2835309999999996 | 0.71045179000000003     |
| O | 0.19235738E+01       | -0.71199813E+00     | 0.20453529E+01           | H | 3.8382455000000002   | -5.9272964000000004 | 1.3441333000000000      |
| C | 0.17575753E+01       | -0.14405476E+01     | 0.82618336E+00           | H | 3.4268171999999999   | -4.6947162999999996 | 0.59968723000000002     |
| C | 0.19202197E+01       | -0.29199039E+01     | 0.12139579E+01           | O | -0.77508021000000005 | -4.5271435000000002 | 3.6819657000000001      |
| C | 0.21518361E+01       | -0.12666084E+01     | 0.42196149E+01           | H | 0.19657516999999999  | -4.5765114999999996 | 3.7109024000000002      |
| C | 0.47298234E+00       | -0.11573362E+01     | 0.23408638E+00           | H | -0.94769070000000000 | -5.0436730000000001 | 2.8806850000000002      |
| O | -0.69778149E+00      | -0.14901265E+01     | 0.10304734E+01           | O | 4.3784603999999998   | -5.4199602999999996 | 3.5686306999999999      |
| O | 1.94477030000000001  | -3.7672891000000002 | 0.24010504999999999      | H | 5.1268034000000000   | -4.8586195999999999 | 3.3668985999999999      |
| O | 1.8448277000000000   | -4.0965087999999996 | 3.3714430000000002       | H | 3.6196202999999998   | -4.8105168000000003 | 3.7055375000000002      |
| C | 0.27167036E+00       | 0.32948719E+00      | -0.29988558E+00          | O | -0.39997556000000001 | -5.2546111000000000 | -0.31695404999999999    |
| O | -0.10553924E+01      | 0.46064781E+00      | -0.70973213E+00          | H | 0.37540183999999999  | -4.7690080000000004 | 1.9708967000000001E-002 |
| H | 0.26180283E+01       | -0.10865308E+01     | 0.23739624E+00           | O | -0.76339310000000005 | -5.5989275999999997 | 0.49399838000000001     |
| H | 0.52114952E+00       | 0.10341117E+01      | 0.46868571E+00           | H | 1.5333238000000000   | -4.0211750000000004 | 6.2399696000000002      |
| H | 0.98229376E+00       | 0.49620361E+00      | -0.11827636E+01          | H | 1.8045838000000001   | -4.9419535000000003 | 6.6048720000000003      |
| H | -0.15634521E+01      | 0.69857932E+00      | 0.70092811E-01           | H | 1.5093306000000000   | -0.0846448999999998 | 5.2274567999999997      |
| H | 0.43747551E+00       | -0.18218374E+01     | -0.56578688E+00          | O | 0.95314752999999997  | -3.7764986999999999 | -2.2092901000000000     |
| H | -0.40986670E+00      | -0.17123263E+01     | 0.19544338E+01           | H | 1.2604541000000000   | -4.5853579000000000 | -2.6236989999999998     |
| O | 1.9310080000000001   | -6.2311208999999996 | 1.7116141000000000       | H | 1.5558107000000001   | -3.8249224000000002 | -1.3691628000000000     |
| H | 1.6809605000000001   | -5.7842076999999996 | 2.5593693000000002       | O | 4.3882105999999999   | -3.0422796999999999 | -1.6261515000000000     |
|   |                      |                     |                          | H | 3.7189272999999998   | -3.4539453000000000 | -1.0934834000000000     |

|   |                          |                     |                          |   |                         |                     |                         |
|---|--------------------------|---------------------|--------------------------|---|-------------------------|---------------------|-------------------------|
| H | 4.5056231999999996       | -2.2545883999999998 | -1.1176060999999999      | O | -0.68049538E+00         | -0.18963480E+01     | 0.12217094E+01          |
| O | -0.9384216699999999      | -1.9509563000000001 | 4.6059256000000000       | O | 2.0722984000000002      | -4.0119536000000000 | 0.3715020199999999      |
| H | -0.8580323899999998      | -2.7466927999999999 | 4.1635930999999999       | O | 1.8024860000000000      | -4.0593940000000002 | 3.5212794000000001      |
| H | -4.5125938999999997E-002 | -2.0355348000000002 | 5.0112598000000004       | C | 0.27929262E-01          | -0.12120283E+00     | -0.22773396E+00         |
| O | 1.0783094000000000       | -8.7326104999999998 | 2.7286760999999999       | O | -0.13167263E+01         | -0.60067447E-01     | -0.69828779E+00         |
| H | 1.3229795000000000       | -7.8345501999999998 | 2.4806246999999999       | H | 0.24652460E+01          | -0.12200810E+01     | 0.11420488E+00          |
| H | 1.9506327999999999       | -9.1503614700000000 | 2.5436447000000002       | H | 0.22275046E+00          | 0.65839369E+00      | 0.54616329E+00          |
| O | 6.3059959000000001       | -3.7784575000000000 | 1.9904077000000000       | H | 0.66536182E+00          | -0.13308227E-01     | -0.11346602E+01         |
| H | 5.8891888000000003       | -4.3651846000000001 | 1.3495824000000001       | H | -0.18321478E+01         | -0.32026961E-01     | 0.12793200E+00          |
| H | 7.1592428000000004       | -2.2445510000000001 | 2.1894524000000000       | H | 0.25062718E+00          | -0.23088115E+01     | -0.55623521E+00         |
| O | 4.3304925000000001       | -3.0063102000000002 | 5.6951228000000000       | H | -0.29386009E+00         | -0.25631192E+01     | 0.18629597E+01          |
| H | 3.3721787000000001       | -3.1004133999999999 | 5.7155072000000002       | O | 1.8852622000000001      | -6.3290620000000004 | 1.9445422000000001      |
| H | 4.3422394999999998       | -2.5196939000000000 | 6.5139221999999997       | H | 2.0712581000000001      | -5.8784060000000000 | 2.8108694999999999      |
| C | 0.20068558E+01           | -0.29384943E+01     | 0.26348319E+01           | H | 1.9964701000000000      | -5.5517652000000002 | 1.2724077000000000      |
| C | 0.19402167E+01           | -0.15861835E+01     | 0.30835726E+01           | O | 4.3573697999999998      | -5.5239247000000002 | 1.1899146000000000      |
| O | 0.17717161E+01           | -0.64307269E+00     | 0.20069292E+01           | H | 3.6403428000000000      | -6.1932023999999997 | 1.3703555999999999      |
| C | 0.17928251E+01           | -0.14144289E+01     | 0.81264934E+00           | H | 3.6964996999999999      | -4.9276140000000002 | 0.7527245999999999      |
| C | 0.20147548E+01           | -0.28545390E+01     | 0.12438491E+01           | O | -0.3515396499999998     | -5.2195233999999999 | -0.1966888199999999     |
| O | 0.17536899E+01           | -0.12001153E+01     | 0.42441335E+01           | H | 0.5523004799999998      | -4.9020253000000000 | 6.9373715999999997E-003 |
| C | 0.39455958E+00           | -0.12113866E+01     | 0.24816225E+00           | H | -0.5329457399999999     | -5.7056908999999996 | 0.6366318199999999      |
| O | -0.50284552E+00          | -0.15225127E+01     | 0.13585564E+01           | O | 4.2081179999999998      | -5.5430469999999996 | 3.8938836999999999      |
| O | 2.0343513000000000       | -3.8510548999999998 | 0.4413051100000000       | H | 4.4402825000000004      | -5.4322977999999997 | 2.9529690000000000      |
| O | 2.0447185999999999       | -4.0202799999999996 | 3.4029805000000000       | H | 3.3510938000000001      | -5.0856402000000003 | 3.9101778000000000      |
| C | 0.12036755E+00           | 0.24771369E+00      | -0.83714470E-01          | O | -1.0496650999999999     | -4.7622064000000002 | 3.6757493000000001      |
| O | -0.11465871E+01          | 0.48285072E+00      | -0.67486926E+00          | H | -7.303479799999998E-002 | -4.6615826000000000 | 3.6779397000000000      |
| H | 0.25076035E+01           | -0.10504213E+01     | 0.46901371E-01           | H | -1.1940640000000000     | -5.5930431000000000 | 3.1790137000000000      |
| H | 0.13203711E+00           | 0.93260982E+00      | 0.83382098E+00           | O | 4.4214368000000004      | -3.3304266999999999 | -1.2298258000000000     |
| H | 0.82540947E+00           | 0.70141014E+00      | -0.78783752E+00          | H | 3.5946889000000000      | -3.5643378000000001 | -0.8139503399999999     |
| H | -0.17992403E+01          | 0.64175298E+00      | 0.42232812E-01           | H | 4.4883269999999999      | -2.4572862000000000 | -0.8510045299999998     |
| H | 0.20188589E+00           | -0.18737960E+01     | -0.61425317E+00          | O | 1.5612393000000000      | -4.3011080000000002 | 6.2181446999999999      |
| H | -0.13640104E+00          | -0.22966940E+01     | 0.18318667E+01           | H | 2.4102201999999999      | -4.5717429999999996 | 6.5217454999999998      |
| O | 1.5393460000000001       | -6.3702562000000000 | 2.0235316000000001       | H | 1.6930293999999999      | -4.1562713999999996 | 5.2796165999999998      |
| H | 1.7602537000000000       | -5.8382963999999999 | 2.7760438999999999       | O | 1.3688989000000000      | -3.5118543999999998 | -2.4887850000000000     |
| H | 1.5897893999999999       | -5.6775070999999997 | 1.3392067000000001       | H | 1.5976417000000001      | -4.2930843999999997 | -3.0064388000000002     |
| O | 4.2285520999999999       | -5.6394849000000002 | 0.8131801199999999       | H | 1.4218189000000001      | -3.8329745000000002 | -1.5721375000000000     |
| H | 4.2523232999999997       | -6.2055322000000004 | 1.6445554000000000       | O | -0.9521934199999999     | -2.0714280999999999 | 4.4057731000000002      |
| H | 3.3023355000000000       | -4.9702732000000004 | 1.0710554999999999       | H | -1.0948181600000000     | -3.0236201000000000 | 4.2153152000000000      |
| O | 4.2984515999999999       | -5.3829295999999998 | 3.6787823999999998       | H | 4.1190931000000000E-002 | -1.9989213000000000 | 4.4249435999999998      |
| H | 5.0162173000000001       | -4.8330460000000004 | 3.4863411000000002       | O | 4.2539180999999999      | -2.8303137000000000 | 5.5774262999999999      |
| H | 3.5212838000000000       | -4.7841291999999997 | 3.4215173999999999       | H | 3.5630784000000002      | -2.3796363999999999 | 5.0698903000000000      |
| O | -0.7093892699999996      | -4.4037477000000003 | 3.2636528000000000       | H | 4.3379946000000000      | -2.1884785000000000 | 6.3180873999999996      |
| O | 0.2385306299999999       | -4.3384637000000001 | 3.3567562000000000       | O | 6.5403025000000001      | -3.9703966999999998 | 1.9652877000000000      |
| H | -0.7863464000000000      | -5.3452114999999996 | 2.9960518999999999       | H | 5.7982617999999997      | -4.5241210000000001 | 1.4675107000000001      |
| O | -0.5826408100000001      | -5.1015215999999999 | -9.3329227000000001E-002 | H | 7.0915600000000003      | -4.7085014999999997 | 2.2255161999999999      |
| H | 0.3088162500000001       | -4.7386654999999998 | 0.1102383900000001       | O | 1.9337714000000000      | -8.8624080000000003 | 2.7013957000000000      |
| H | -1.0303290000000001      | -5.3120984000000000 | 0.7585039399999999       | H | 1.3703880000000000      | -7.9758227000000002 | 2.3179813000000000      |
| O | 4.1361660999999996       | -3.1830596000000000 | -1.5770983999999999      | H | 1.8624057000000001      | -9.4078599999999994 | 2.2977194000000001      |
| H | 3.4378511000000000       | -3.5760527000000000 | -0.9634905600000000      | C | 0.18981901E+01          | -0.32023805E+01     | 0.25020825E+01          |
| H | 4.5319592000000002       | -2.5685270000000000 | -1.0051782000000000      | C | 0.18898852E+01          | -0.17921441E+01     | 0.28776919E+01          |
| O | 1.4212013999999999       | -4.0331307000000001 | 6.0728128999999997       | O | 0.18613445E+01          | -0.92805286E+00     | 0.17865132E+01          |
| H | 1.8595664000000001       | -4.8899058000000002 | 6.3612950000000001       | C | 0.16197482E+01          | -0.18053276E+01     | 0.64379884E+00          |
| H | 1.7819166000000000       | -3.9628207999999998 | 5.1499625000000000       | C | 0.20042861E+01          | -0.31792893E+01     | 0.11270923E+01          |
| O | 0.9591437499999999       | -3.7874555000000001 | -2.3326688000000000      | O | 0.20229446E+01          | -0.13322598E+01     | 0.40464877E+01          |
| H | 1.7146850000000000       | -4.3094405000000000 | -2.5533109999999999      | C | 0.51084250E-01          | -0.17532638E+01     | 0.24186598E+00          |
| H | 1.2207197999999999       | -3.7665758999999999 | -1.3441197000000000      | O | -0.84368563E+00         | -0.19554454E+01     | 0.13869133E+01          |
| O | 4.2924695000000002       | -2.8312281000000001 | 5.4455913999999996       | O | 2.0977652999999998      | -4.1465163000000000 | 0.2258635500000000      |
| H | 3.3671015000000000       | -2.8927594000000001 | 5.0601145000000001       | O | 1.9711155000000000      | -4.1405139999999996 | 3.4276323000000000      |
| H | 4.1404920000000001       | -2.3466705000000001 | 6.2656267000000003       | C | -0.21333394E+00         | -0.41999449E+00     | -0.43857973E+00         |
| O | 6.3656309999999996       | -4.0902903000000004 | 1.6814605000000000       | O | -0.15477308E+01         | -0.13876181E+00     | -0.85103983E+00         |
| H | 5.7693599999999998       | -4.6988344000000000 | 1.2736132000000000       | H | 0.22901275E+01          | -0.15039771E+01     | -0.21175789E+00         |
| H | 7.0445491000000002       | -4.7161488000000000 | 1.7599758999999999       | H | 0.24098945E+00          | 0.36286323E+00      | 0.22616499E+00          |
| O | -0.9752636300000005      | -2.1253182000000002 | 4.4380549000000000       | H | 0.35853431E+00          | -0.43143232E+00     | -0.14401164E+01         |
| H | -1.1138428000000000      | -3.0598158999999998 | 4.0287132000000003       | H | -0.21162669E+01         | 0.36862469E-01      | -0.91657848E-01         |
| H | -4.0207645000000000E-002 | -2.1407001000000001 | 4.6433657000000004       | H | -0.19590158E+00         | -0.26027932E+01     | -0.41803188E+00         |
| O | 1.2697274000000001       | -8.9543423000000004 | 2.7567986000000002       | H | -0.44372274E+00         | -0.27139446E+01     | 0.18501751E+01          |
| H | 1.3137938000000000       | -8.0964627999999994 | 2.3245355000000001       | O | 1.6316843999999999      | -6.4754345999999998 | 1.8436395000000001      |
| H | 2.1618471000000001       | -9.3035463000000007 | 2.6070319000000000       | H | 1.6574918000000001      | -5.7920303999999998 | 1.9295919000000002      |
| C | 0.19101670E+01           | -0.30900019E+01     | 0.26550006E+01           | H | 1.8290101999999999      | -5.8618768000000001 | 1.0921757999999999      |
| C | 0.19230230E+01           | -0.16645340E+01     | 0.30479069E+01           | O | 4.3134778999999996      | -5.3301926000000002 | 0.9958399999999995      |
| O | 0.18703492E+01           | -0.81576953E+00     | 0.19753327E+01           | H | 3.8277828999999999      | -5.8780456000000001 | 1.7108676000000000      |
| C | 0.17957817E+01           | -0.16644273E+01     | 0.82127392E+00           | H | 3.6583584000000000      | -4.7586461000000000 | 0.5033298499999997      |
| C | 0.19602084E+01           | -0.31054988E+01     | 0.12646300E+01           | O | 4.1891445999999997      | -5.4912589000000001 | 4.0379475999999999      |
| O | 0.18815966E+01           | -0.11441197E+01     | 0.41757234E+01           | H | 4.6503214000000002      | -4.7432568000000002 | 4.4276483000000004      |
| C | 0.33309669E+00           | -0.15353599E+01     | 0.23756847E+00           | H | 3.3755993000000002      | -5.0217026000000002 | 3.7351703999999999      |
|   |                          |                     |                          | O | -0.8107597199999996     | -5.1159207000000002 | 3.8403375999999998      |

|   |                          |                     |                         |   |                          |                     |                      |
|---|--------------------------|---------------------|-------------------------|---|--------------------------|---------------------|----------------------|
| H | -1.6188846000000000E-002 | -4.7250684999999999 | 3.4481362000000000      | H | 5.9994252000000001       | -4.1790592999999996 | 1.2945860000000000   |
| H | -1.1194656000000001      | -5.7512308000000001 | 3.1629801000000000      | H | 7.1998248000000000       | -4.8221657000000002 | 2.0117756000000000   |
| O | -0.8555259200000005      | -5.2098443000000003 | 1.6077959999999999E-002 | O | 4.5804387000000002       | -7.2682774999999999 | -1.1656385000000000  |
| H | 5.8596263000000003E-002  | -5.1628128000000002 | 0.2695908400000000      | H | 4.3266251000000002       | -6.6907205000000003 | -0.3545188500000000  |
| H | -1.2216180999999999      | -5.9691473000000004 | 0.5831228899999995      | H | 5.4137763000000003       | -6.8538711000000001 | -1.4025095000000001  |
| O | 4.4003076999999999       | -3.4580128000000001 | -1.5535412000000000     |   |                          |                     |                      |
| H | 3.6339814000000001       | -3.7629046000000002 | -0.9833480100000005     | C | 0.18922933E+01           | -0.30255229E+01     | 0.24999430E+01       |
| H | 4.7358697999999997       | -2.7049555999999999 | -1.0186215000000001     | C | 0.19882449E+01           | -0.16925406E+01     | 0.29506263E+01       |
| O | 1.6186898999999999       | -4.1864074999999996 | 6.1722504000000002      | O | 0.1873102E+01            | -0.74252108E+00     | 0.18815969E+01       |
| H | 2.5629119999999999       | -4.0605760000000000 | 6.2182788000000002      | C | 0.16070775E+01           | -0.15210042E+01     | 0.73873866E+00       |
| H | 1.4822191000000000       | -4.0301124000000002 | 5.2122251999999998      | C | 0.17933349E+01           | -0.29512582E+01     | 0.11526699E+01       |
| O | 4.2986462000000003       | -2.9694626999999998 | 5.3613743999999999      | O | 0.21588248E+01           | -0.12337171E+01     | 0.41165701E+01       |
| H | 3.5261298999999999       | -2.7046684000000001 | 4.7850327999999998      | C | 0.11105657E+00           | -0.14310670E+01     | 0.23357222E+00       |
| H | 4.3694595999999999       | -2.2785720999999999 | 6.0994399000000001      | O | -0.80313855E+00          | -0.15729981E+01     | 0.13592614E+01       |
| O | 0.9239732499999997       | -3.4024453000000001 | -2.5412911999999999     | O | 1.8265662000000000       | -3.8869492000000001 | 0.24773123999999999  |
| H | 1.5261218999999999       | -3.6823410000000002 | -3.2559108999999999     | O | 1.9464735000000000       | -4.1084126999999997 | 3.2865207000000001   |
| H | 1.3801277999999999       | -3.7195151000000002 | -1.7485359000000000     | C | -0.18139433E-01          | -0.42812851E+00     | -0.27821851E+00      |
| O | 6.5560060000000000       | -4.0084730000000000 | 2.0730960999999999      | O | -0.13629840E+01          | 0.21951129E+00      | -0.95066877E+00      |
| H | 5.7743558999999998       | -4.4478144000000004 | 1.6880828000000001      | H | 0.22439657E+01           | -0.12368047E+01     | -0.64470844E+01      |
| H | 7.0981455999999996       | -4.7857007999999999 | 2.1151981000000002      | H | 0.30043352E+00           | 0.78558974E+00      | 0.27359788E+00       |
| O | 1.2673741999999999       | -8.8939266999999997 | 2.8121347999999999      | H | 0.57047654E+00           | 0.48550602E-01      | -0.13421583E+01      |
| H | 1.5250706999999999       | -8.0456403999999996 | 2.4855662000000001      | H | -0.19817220E+01          | 0.30454842E+00      | -0.20060008E+00      |
| H | 2.0413036000000000       | -9.4485472000000001 | 2.7079203999999999      | H | -0.13954105E+00          | -0.22326701E+01     | -0.50576221E+01      |
| O | -1.2057502000000000      | -2.3051222999999998 | 4.6718868999999996      | H | -0.46046902E+00          | -0.23076602E+01     | 0.19021384E+01       |
| H | -1.1928407000000001      | -3.0619633999999998 | 4.0462021000000004      | O | 1.5873835999999999       | -6.6437793999999997 | 1.8812841000000000   |
| H | -0.3019498600000001      | -2.4494432000000002 | 4.9375429999999998      | H | 1.4895387000000000       | -5.7193877999999998 | 2.2611344999999999   |
|   |                          |                     |                         | H | 2.0369377000000002       | -6.3328325000000003 | 1.0275893000000000   |
| C | 0.16933973E+01           | -0.30444333E+01     | 0.25124590E+01          | O | 4.2951363000000002       | -5.0759746999999997 | 0.8469606699999997   |
| O | 0.18901861E+01           | -0.16682460E+01     | 0.29435749E+01          | H | 4.2966765999999996       | -5.3192174999999997 | 1.8196912999999999   |
| O | 0.19082928E+01           | -0.77491948E+00     | 0.18564988E+01          | H | 3.4324887999999998       | -4.6311456000000000 | 0.7209375500000004   |
| C | 0.16273143E+01           | -0.15552268E+01     | 0.69435848E+00          | O | -0.5485622799999996      | -5.3059251999999999 | -0.2817705000000000  |
| C | 0.18768433E+01           | -0.29910964E+01     | 0.11186895E+01          | H | 0.3607212599999999       | -4.9362712999999996 | 3.5863060999999998   |
| O | 0.21013355E+01           | -0.12652279E+01     | 0.40780066E+01          | H | -0.8499168299999996      | -5.6788487999999999 | 2.9134259000000000   |
| C | 0.23551949E+00           | -0.14550257E+01     | 0.13792678E+00          | O | -0.7991660699999995      | -5.1199842000000002 | -0.1315590100000000  |
| O | -0.82241893E+00          | -0.17259095E+01     | 0.10914454E+01          | H | 8.4183630999999995E-002  | -5.0044876000000000 | 0.24515081999999999  |
| O | 2.1741741000000001       | -3.9471058999999999 | 0.24699472000000000     | H | -1.2772736000000000      | -5.5494620999999998 | 0.5938025200000000   |
| O | 1.7442161000000000       | -4.1079923999999997 | 3.3998401000000000      | O | 4.2206913999999998       | -5.5006893999999997 | 3.5533169000000000   |
| C | -0.11956429E+00          | -0.38195887E-01     | -0.38195887E-01         | H | 4.8300846000000002       | -4.7166632000000002 | 3.7083173999999999   |
| O | -0.14416353E+01          | 0.10586765E+00      | -0.80691799E+00         | H | 3.3211246999999999       | -5.1281929000000002 | 3.6056794999999999   |
| O | 0.23586096E+01           | -0.12748490E+01     | -0.13519623E+00         | O | 4.2110278000000001       | -3.3471147000000001 | -1.4308301000000001  |
| H | 0.21808685E-01           | 0.70759249E+00      | 0.43475778E+00          | H | 3.4821403000000002       | -3.6996693000000000 | -0.9254231299999998  |
| H | 0.47016665E+00           | 0.20409824E+00      | -0.12904227E+01         | H | 4.4335186000000002       | -2.6595963999999999 | -0.8069544400000005  |
| H | -0.20392600E+01          | 0.24448965E+00      | -0.6840607E-01          | O | 0.9298644000000004       | -3.5795357000000001 | -2.4073866000000002  |
| H | 0.31700821E+00           | -0.21611763E+01     | -0.69473872E+00         | H | 1.4470658000000001       | -4.1541490000000003 | -2.9045293999999999  |
| H | -0.57900163E+00          | -0.23095133E+01     | 0.18345244E+01          | H | 1.1896865999999999       | -3.7793524999999999 | -1.4544010999999999  |
| O | 1.4567277999999999       | -6.3563398000000003 | 1.7038390999999999      | O | 1.7316815000000001       | -4.0700946000000000 | 6.1714523999999997   |
| H | 1.5799810000000001       | -5.8665929999999999 | 2.5368832000000001      | H | 2.6490279999999999       | -3.8546713000000001 | 6.0483396999999997   |
| H | 1.8286492999999999       | -5.6515371999999999 | 1.1185607000000000      | H | 1.4734248999999999       | -4.1989672000000002 | 5.1923876000000000   |
| O | 4.4312929000000000       | -5.2457221000000001 | 3.5198752999999998      | O | -1.0049660000000000      | -2.7057251000000000 | 4.5648626999999999   |
| H | 4.1955410000000001       | -4.4198392999999996 | 3.8082600000000002      | H | -1.2048479999999999      | -3.6117739100000001 | 4.3988526999999999   |
| H | 3.1908162999999998       | -4.8919978000000004 | 3.4603100000000002      | H | -5.5661909000000002E-002 | -2.8082962000000000 | 4.8130426999999996   |
| O | 4.4760740999999999       | -5.3877968000000003 | 0.6794824200000003      | O | 6.4755168999999997       | -3.7917573999999998 | 2.1773601000000000   |
| H | 4.4775219000000002       | -5.4978780000000000 | 1.6357956000000000      | H | 5.8787501999999998       | -4.1190626000000004 | 1.4598447000000001   |
| H | 3.5113699999999999       | -5.2300711000000000 | 0.5748268399999995      | H | 7.0495726000000003       | -4.5705872999999997 | 2.1513414000000002   |
| O | -0.9264023399999999      | -4.8297727000000004 | 0.3568257500000000      | O | 4.6392711000000002       | -7.0021621999999999 | -1.0926225000000001  |
| H | 6.5170000000000002E-003  | -4.7389931000000001 | 0.6111347299999996      | H | 4.3352972999999997       | -6.5021585999999996 | -0.30793385000000001 |
| H | -1.1959689000000000      | -5.6544692000000003 | 0.6742632600000003      | H | 5.3038647000000001       | -6.3341270999999999 | -1.5044115000000000  |
| O | -0.7469076300000004      | -5.2180384000000002 | 3.6877466000000001      | O | 4.1642207999999998       | -2.7188672000000000 | 5.4087638000000000   |
| H | 0.1853604700000000       | -4.9563986000000000 | 3.5157208999999998      | H | 3.5659229999999998       | -0.2221328000000001 | 5.0613698999999999   |
| H | -0.9899094400000003      | -5.7240286999999999 | 2.8404978000000001      | H | 4.5627643000000004       | -2.2601037000000002 | 6.2321410999999998   |
| O | 4.0535734999999997       | -3.2607295999999999 | -1.5415061999999999     |   |                          |                     |                      |
| H | 3.3798580000000000       | -3.5290976999999999 | -0.8362714799999996     | C | 0.18113028E+01           | -0.31072160E+01     | 0.25672158E+01       |
| H | 4.4572702000000000       | -2.5403783999999998 | -1.0398414000000000     | C | 0.18107691E+01           | -0.17685011E+01     | 0.30638617E+01       |
| O | 1.5736612000000001       | -4.0879060000000003 | 6.1484125000000001      | O | 0.18847921E+01           | -0.79618945E+00     | 0.19922105E+01       |
| H | 2.5661170000000002       | -4.0373180000000000 | 6.2080291000000001      | C | 0.17754599E+01           | -0.15979100E+01     | 0.77256737E+00       |
| H | 1.4926378000000000       | -4.0484346999999996 | 5.1591902999999997      | O | 0.19348717E+01           | -0.29955239E+01     | 0.12056895E+01       |
| O | 0.1167299499999999       | -3.6165295999999998 | -2.5980333999999998     | C | 0.17343829E+01           | -0.13816937E+01     | 0.42808088E+01       |
| H | 1.7055674000000001       | -4.2777364999999996 | -3.0041091999999998     | O | 0.38517779E+00           | -0.13613287E+01     | 0.15801885E+00       |
| H | 1.5672632000000000       | -3.5701103000000001 | -1.7059343000000000     | O | -0.65076895E+00          | -0.15978185E+01     | 0.12078435E+01       |
| O | -1.2154763000000000      | -2.4602284000000001 | 4.3890650999999998      | O | 2.0422932999999999       | -3.9280593000000001 | 0.27696885999999998  |
| H | -1.7430243999999999      | -3.2621329999999999 | 4.1018239999999997      | O | 1.7316407000000000       | -4.1175464000000002 | 3.3976421999999999   |
| H | -0.3440847200000001      | -2.8155130000000002 | 4.5848880000000003      | C | 0.14118259E+00           | 0.3112827E-01       | -0.43729752E+00      |
| O | 4.2027201999999999       | -2.6638044999999999 | 5.5124409999999999      | O | -0.11961687E+01          | 0.61412535E-01      | -0.93231168E+00      |
| C | 3.2738529999999999       | -2.4355978000000000 | 5.2278150999999999      | H | 0.24166804E+01           | -0.11550024E+01     | -0.46564710E-01      |
| H | 4.4552730000000000       | -2.1433171999999998 | 6.3671087999999996      | H | 0.29348039E+00           | 0.78845448E+00      | 0.27352785E+00       |
| O | 6.7303438000000000       | -3.9492677999999999 | 1.9088822999999999      | H | 0.877788156E+00          | 0.19258027E+00      | -0.12406377E+01      |

|   |                     |                     |                         |   |                         |                     |                          |
|---|---------------------|---------------------|-------------------------|---|-------------------------|---------------------|--------------------------|
| H | -0.17127251E+01     | -0.28301349E+00     | -0.13676599E+00         | O | 1.6641248000000000      | -3.8918457000000002 | 6.1642957000000003       |
| H | 0.25431518E+00      | -0.21358409E+01     | -0.63406915E+00         | H | 2.6456477999999999      | -3.8732129000000000 | 6.2324846999999997       |
| H | -0.57020364E+00     | -0.95850406E+00     | 0.19033839E+01          | H | 1.6516717999999999      | -3.7989437000000001 | 5.2002157000000002       |
| O | 1.6826242000000000  | -6.3875798000000001 | 1.9180151999999999      | O | -0.86835097000000006    | -3.2816869000000000 | 4.5947554000000004       |
| H | 1.6207209000000000  | -5.5574140999999999 | 2.5237854999999998      | H | -1.2151921999999999     | -4.1715451999999997 | 4.4883017000000001       |
| H | 1.8205392000000000  | -6.0450096000000002 | 1.0443958000000000      | H | 8.9292544000000001E-002 | -3.3765375000000000 | 4.6363674000000001       |
| O | 4.3979816999999999  | -5.2851375000000003 | 0.96056386000000005     | O | 1.0999060000000001      | -3.2850760999999999 | -2.3129482000000001      |
| H | 4.2563715999999996  | -5.5393309000000004 | 1.9187988000000000      | H | 1.3935295000000001      | -3.8153340999999998 | -3.0518730000000001      |
| H | 3.5155577999999998  | -4.9707688000000001 | 0.7153265199999997      | H | 1.3487199999999999      | -3.8590743999999999 | -1.5589693000000000      |
| O | -0.6650804799999997 | -5.0497658999999997 | -5.564061599999997E-002 | O | 1.3342598999999999      | -8.8865204000000002 | 3.0731071000000001       |
| O | 0.1888112899999999  | -4.6133759000000003 | 0.1890873399999999      | H | 1.3546385999999999      | -7.9803709999999999 | 2.7441342999999998       |
| H | -0.8641606899999995 | -5.6292691000000001 | 0.6647280700000000      | H | 2.0162874999999998      | -9.2450296999999999 | 2.5101996000000000       |
| O | 4.1964788000000004  | -5.5540823000000001 | 3.6053777999999999      | O | 6.4423858999999997      | -3.6612760999999998 | 2.3757720999999998       |
| H | 4.9153254000000004  | -4.8778930999999996 | 3.7431619999999999      | H | 5.8200270999999999      | -3.7090505999999999 | 1.6549714000000000       |
| H | 3.3872333999999999  | -5.1179123000000004 | 3.6084711999999999      | H | 6.7164256000000000      | -4.5821487999999997 | 2.3337995999999999       |
| O | -0.4113342099999998 | -5.8462708000000001 | 4.0028766999999998      | O | -2.8813287000000001     | -2.9625971000000000 | 0.6805034199999997       |
| H | 0.4765970900000000  | -5.5504540999999996 | 3.8336858999999999      | H | -2.7356064999999998     | -3.5365117000000001 | -7.7149923999999995E-002 |
| O | -0.5525294699999997 | -6.3014260000000002 | 3.1685807000000001      | H | -1.9839443999999999     | -2.6574946000000002 | 0.8684809399999998       |
| O | 4.4704484000000004  | -3.2160356000000001 | -1.2206158000000000     |   |                         |                     |                          |
| H | 3.6538636000000002  | -3.5431580999999999 | -0.7702568600000004     | C | 0.18258432E+01          | -0.31705324E+01     | 0.26749657E+01           |
| H | 4.5186647999999998  | -2.3058209999999999 | -0.88854555000000002    | C | 0.18928697E+01          | -0.18269430E+01     | 0.30896851E+01           |
| O | 1.0083578000000000  | -3.6049454999999999 | -2.3479009000000000     | O | 0.169718416E+01         | -0.94377040E+00     | 0.20458958E+01           |
| H | 1.3836583000000000  | -4.3650041999999996 | -2.8514287999999999     | C | 0.16433004E+01          | -0.16596498E+01     | 0.79482389E+00           |
| H | 1.2739016000000001  | -3.6239751600000001 | -1.3754089000000000     | C | 0.18003935E+01          | -0.31051389E+01     | 0.12544418E+01           |
| O | -1.1698763000000001 | -3.0887516000000002 | 4.4932037999999999      | O | 0.20468327E+01          | -0.13993756E+01     | 0.42425001E+01           |
| H | -1.3453271000000000 | -4.0368282000000004 | 4.3578662000000001      | C | 0.20984536E+00          | -0.14336864E+01     | 0.26735053E+00           |
| H | -0.1808818500000001 | -3.1716451000000001 | 4.5197313000000001      | O | -0.73559115E+00         | -0.17146490E+01     | 0.13105167E+01           |
| O | 1.8116566000000001  | -4.1147194000000002 | 6.3078446000000001      | O | 1.8653865000000001      | -4.0255630000000000 | 0.3338976200000001       |
| H | 2.7043020000000002  | -3.8074276999999999 | 6.4159617999999998      | O | 1.8837212999999999      | -4.3001937000000000 | 3.4119370999999998       |
| H | 1.7313778000000000  | -3.9520461999999998 | 5.3441751000000002      | C | 0.94740757E-01          | -0.26085237E-01     | -0.34311985E+00          |
| O | 6.5333882000000001  | -3.6097668000000001 | 2.5446802000000002      | O | -0.11093101E+01         | 0.16189354E+00      | -0.10943590E+01          |
| H | 5.7096628999999997  | -3.6599753000000002 | 1.9158717000000001      | H | 0.24990702E+01          | -0.12808714E+01     | 0.26665869E+00           |
| H | 6.9315154000000003  | -4.5235158000000002 | 2.4769184000000002      | H | 0.31788031E+00          | 0.75519483E+00      | 0.34226504E+00           |
| O | 4.1934309999999997  | -2.6136857000000000 | 5.5128598000000002      | H | 0.85617334E+00          | -0.18906124E+01     | -0.11256795E+01          |
| H | 3.4722371000000001  | -2.2334501000000002 | 4.9967120999999999      | H | -0.18561522E+01         | 0.12044007E+00      | -0.51405030E+00          |
| H | 4.4083465999999998  | -1.9668420000000000 | 6.2424004999999996      | H | -0.47295036E-01         | -0.20818253E+01     | -0.58740993E+00          |
| O | 1.2784245999999999  | -8.9573497999999994 | 2.9542690999999999      | H | -0.57695170E+00         | -0.12991802E+01     | 0.21470055E+01           |
| H | 1.3425586000000000  | -8.1306805999999998 | 2.3939948000000002      | O | 1.9099976000000001      | -6.4285188000000000 | 1.7146538000000000       |
| H | 2.0480181000000002  | -9.4264077000000004 | 2.6171937999999999      | H | 2.0833366000000000      | -5.6648712999999997 | 2.3249233999999999       |
|   |                     |                     |                         | H | 1.7392718000000000      | -5.8325883999999997 | 0.9364335400000001       |
| C | 0.19334847E+01      | -0.31360828E+01     | 0.26076749E+01          | O | 4.6346993999999997      | -5.2052364000000004 | 1.0612303999999999       |
| C | 0.19906093E+01      | -0.17921053E+01     | 0.31577420E+01          | H | 4.2960513000000002      | -5.7546992000000001 | 1.7652276000000000       |
| O | 0.19837126E+01      | -0.83758552E+00     | 0.21157270E+01          | H | 3.7970608000000001      | -4.7589673000000001 | 0.7616923300000003       |
| C | 0.18059672E+01      | -0.15591466E+01     | 0.87644865E+00          | O | 4.1077992999999999      | -5.8206471999999998 | 3.6737883000000000       |
| C | 0.19338736E+01      | -0.30561720E+01     | 0.12162461E+01          | H | 4.6031972000000003      | -4.9953424000000002 | 3.6426656999999998       |
| O | 0.19392664E+01      | -0.13928422E+01     | 0.43373454E+01          | H | 3.2403029999999999      | -5.3743305000000001 | 3.4571562000000000       |
| C | 0.40624877E+00      | -0.13799329E+01     | 0.24905893E+00          | O | -0.80749636000000002    | -5.0153907999999996 | -0.2548556200000000      |
| O | -0.64470116E+00     | -0.15410853E+01     | 0.12452134E+01          | H | 6.8180081000000003E-002 | -4.8238731000000001 | 5.1234113999999997E-002  |
| O | 1.8132302000000000  | -4.0213074999999998 | 0.3748747399999998      | H | -1.1776614999999999     | -5.5969167999999998 | 0.4631802899999999       |
| O | 1.8590130000000003  | -4.1681448000000003 | 3.4393961000000002      | O | -0.5096144000000002     | -5.7197177999999997 | 4.1892040000000001       |
| C | 0.19396673E+00      | 0.21261845E-01      | -0.43222618E+00         | H | 0.38276796000000002     | -5.4291277999999998 | 3.9040149999999998       |
| O | -0.10799695E+01     | 0.17075116E+00      | -0.95464911E+00         | H | -0.79966841000000000    | -6.1717012000000002 | 3.3547908000000000       |
| H | 0.25631695E+01      | -0.12343668E+01     | 0.14213268E+00          | O | 1.7629992999999999      | -3.8547668000000002 | 6.0787174000000004       |
| H | 0.38177857E+00      | 0.82376275E+00      | 0.31246541E+00          | H | 2.4651375999999998      | -4.5367449999999998 | 6.2448522999999998       |
| O | 0.91574074E+00      | 0.24245524E+00      | -0.12637151E+01         | H | 1.7346490000000001      | -3.8316240000000001 | 5.0941650999999997       |
| H | -0.17137286E+01     | -0.65284579E-01     | -0.28886510E+00         | O | 4.4095366000000000      | -3.2211639999999999 | -1.4371035000000001      |
| H | 0.18211176E+00      | -0.21827423E+01     | -0.48404550E+00         | H | 3.6075707000000001      | -3.3104334999999998 | -0.9464685900000005      |
| H | -0.34611763E+00     | -0.21837780E+01     | 0.19307316E+01          | H | 4.6744270999999999      | -2.4087977000000000 | -1.0110645000000000      |
| O | 1.8798288999999999  | -6.4830439000000002 | 1.8541417000000000      | O | 1.2260187000000000      | -3.2395491999999999 | -2.4055209000000000      |
| H | 2.0542194999999999  | -6.0443204000000001 | 2.6506064000000000      | H | 1.2332277000000000      | -3.9852690000000002 | -3.0538028000000002      |
| H | 1.6276527999999999  | -5.7404792999999996 | 1.2025260000000000      | H | 1.4688028000000000      | -3.6003398000000000 | -1.4904288000000001      |
| O | 4.4232706000000004  | -5.1782807000000002 | 0.9245457500000006      | O | 1.3788347000000001      | -8.7427767999999997 | 2.8279814000000001       |
| H | 4.2332026999999997  | -5.6539421000000001 | 1.8129137000000000      | H | 1.5302832000000000      | -7.8270721999999999 | 2.5535301000000001       |
| H | 3.5412716999999998  | -4.9175844000000000 | 0.7456003799999995      | H | 2.1557171999999998      | -9.2242876000000003 | 2.5132017000000002       |
| O | 0.4362891999999997  | -5.7136623999999996 | 3.6727794999999999      | O | 6.5383310999999997      | -3.5001750000000000 | 2.0213454000000000       |
| H | 4.7817151999999998  | -5.1446449999999997 | 3.5568168000000000      | H | 5.7832116999999998      | -3.9385043999999998 | 1.5968747000000001       |
| H | 3.2664314999999999  | -5.1014632999999998 | 3.5886947999999999      | H | 7.1878428999999997      | -4.1364989999999996 | 2.0388736999999999       |
| O | -0.6345466300000000 | -4.8909244000000003 | -0.1679791599999999     | O | -0.92338471000000000    | -2.9715349000000000 | 5.3640777000000002       |
| H | 0.2241396500000000  | -4.5580489000000002 | 0.1451742100000000      | H | -1.0250729000000001     | -3.7473831000000000 | 4.7605046000000000       |
| H | -0.7623453500000003 | -5.6496583999999999 | 0.39500706000000002     | H | 1.6044249999999999E-002 | -2.9248083000000000 | 5.5709518999999998       |
| O | -0.3216190299999997 | -5.8638437999999997 | 4.0732751000000000      | O | 4.7785517000000004      | -7.0933286999999998 | -0.8405776400000001      |
| H | 0.5159194499999995  | -5.3548315000000004 | 3.8095287000000000      | H | 4.6811053999999999      | -6.6050088000000002 | 7.2472528999999999E-003  |
| H | -0.7249487700000002 | -6.1044156999999997 | 3.1926931999999999      | H | 5.5265459000000003      | -6.6956265999999998 | -1.3101432000000000      |
| O | 3.9686875000000001  | -3.0968618999999999 | -1.3995015000000000     |   |                         |                     |                          |
| H | 3.1420503000000002  | -3.2805998000000001 | -0.9229028400000000     | C | 0.16735306E+01          | -0.32075689E+01     | 0.27114432E+01           |
| H | 4.4481275000000000  | -2.5243837999999998 | -0.8403605800000002     | C | 0.15928403E+01          | -0.18758704E+01     | 0.32132172E+01           |

|   |                          |                     |                          |   |                          |                     |                         |
|---|--------------------------|---------------------|--------------------------|---|--------------------------|---------------------|-------------------------|
| O | 0.14410989E+01           | -0.90990138E+00     | 0.22360893E+01           | H | 3.1467225999999999       | -5.3902121999999997 | 3.4055529999999998      |
| C | 0.14107876E+01           | -0.16238831E+01     | 0.99624583E+00           | O | 4.5270961999999999       | -4.9364089000000000 | 1.0560566000000000      |
| C | 0.16619734E+01           | -0.31102646E+01     | 0.13397816E+00           | H | 4.3641829000000003       | -5.2046982000000002 | 2.0077048000000000      |
| O | 0.16184525E+01           | -0.14957336E+01     | 0.44156570E+01           | H | 3.6806918999999998       | -4.7245353000000003 | 0.65804021000000001     |
| C | 0.12971253E+00           | -0.13300960E+01     | 0.10310809E+00           | O | -0.9238640999999997      | -5.3613007000000001 | -0.42228587000000001    |
| O | -0.10828104E+01          | -0.15292072E+01     | 0.86745308E+00           | H | -0.12345287000000001     | -4.9058184000000002 | -0.15317462000000001    |
| O | 1.7949392000000000       | -3.9902131000000001 | 0.43029684000000001      | H | -1.2849808000000000      | -5.7488381999999998 | 0.39015590000000000     |
| O | 1.7070988000000000       | -4.3185387999999998 | 3.4701333999999999       | O | -0.9934384899999995      | -5.0322836999999998 | 4.2060978999999996      |
| C | 0.19261013E+00           | -0.20859435E-01     | -0.61256372E+00          | H | -8.0350202999999995E-002 | -4.7086756000000003 | 4.0147066000000002      |
| O | -0.97358251E+00          | 0.28472371E+00      | -0.13526568E+01          | H | -1.1647786000000000      | -5.6831927000000002 | 3.5464943999999998      |
| H | 0.22571881E+01           | -0.11384578E+01     | 0.47207413E+00           | O | 1.8606731000000001       | -4.2283248000000002 | 6.1004883000000003      |
| H | 0.30163250E+00           | 0.76535531E+00      | 0.12912799E+00           | H | 2.7662369999999998       | -4.3990679000000004 | 6.2321739999999997      |
| H | 0.10496488E+01           | -0.71342266E-01     | -0.13041944E+01          | H | 1.7710661999999999       | -4.3978830000000002 | 5.1171803999999996      |
| H | -0.18008919E+01          | 0.17219835E+00      | -0.84641615E+00          | O | 0.81047462999999997      | -3.2438429000000002 | -2.1867543000000000     |
| H | 0.16717133E+00           | -0.21054895E+01     | -0.64685816E+00          | H | 1.0589303999999999       | -3.9949981999999999 | -2.7140594000000000     |
| H | -0.98087045E+00          | -0.10923069E+01     | 0.17373297E+01           | H | 1.0558403000000001       | -3.5399229999999999 | -1.2837901000000000     |
| O | 1.6317656000000000       | -6.4843498000000004 | 1.8103526999999999       | O | -3.2409423999999998      | -3.2409423999999998 | -1.6641234000000000     |
| H | 1.5520388000000001       | -5.7775499000000003 | 2.4975486999999998       | H | 3.0152608000000001       | -3.4434635999999998 | -1.3063990000000001     |
| H | 1.7570119000000000       | -5.9386910000000000 | 0.97059675000000001      | H | 4.2262636000000002       | -2.5727856999999998 | -0.98490451000000001    |
| O | 3.9141455000000001       | -5.6648022999999998 | 3.4528365000000001       | O | -0.89836799000000001     | -2.3043703000000000 | 4.8767218999999997      |
| H | 4.0629173999999999       | -4.8287518000000000 | 4.0043357000000004       | H | -1.1125221999999999      | -3.2146455000000000 | 4.7771455999999999      |
| H | 2.9505102999999999       | -5.4877301000000003 | 3.3200409999999999       | H | 5.80076600000000003E-002 | -2.4116247000000000 | 4.8056508999999998      |
| O | 4.5444101999999997       | -4.9667899000000002 | 0.86499762999999996      | O | -1.5252289999999999      | -6.9743573999999997 | 2.0519908999999998      |
| H | 4.3045711999999998       | -5.3434241000000000 | 1.7757209000000000       | H | -1.0142758000000000      | -7.7158297999999998 | 1.6361246000000000      |
| H | 3.7016442999999999       | -4.5824033000000002 | 0.55222777999999995      | H | -2.0124651000000000      | -7.4676596999999996 | 2.7303231000000001      |
| O | -0.68479456000000005     | -5.3628679999999997 | 4.1098084000000004       | O | 1.2141085999999999       | -9.0168073000000000 | 3.1442445999999999      |
| H | 0.14279796000000000      | -4.9486758999999996 | 3.7226262000000001       | H | 1.1642276000000000       | -8.3128584000000008 | 2.4568051000000000      |
| O | -1.0577072999999999      | -5.8558022000000003 | 3.3510320000000000       | H | 2.0027225000000000       | -9.5996857999999996 | 2.7363690000000000      |
| O | -0.84768701000000002     | -5.4406650000000001 | -0.28537910000000000     | O | -3.08311560000000002     | -3.0239037000000000 | 0.33923418999999999     |
| H | -2.8529414999999999E-002 | -5.1174808000000001 | -2.4152593999999999E-002 | H | -3.3169854999999999      | -2.5686165999999999 | -0.44104398000000000    |
| H | -1.2589777000000000      | -5.8370128000000000 | 0.55693201999999997      | H | -2.1676161000000000      | -2.7495707000000000 | 0.55602803999999995     |
| O | 1.8238981000000001       | -4.0681013999999998 | 6.2050764000000003       |   |                          |                     |                         |
| H | 2.4352271999999999       | -4.7218596000000002 | 6.4235546000000001       | C | 0.16579399E+01           | -0.32868547E+01     | 0.24750892E+01          |
| H | 1.8307179000000000       | -4.0422564999999997 | 5.2185078000000003       | C | 0.18167588E+01           | -0.19763150E+01     | 0.29766156E+01          |
| O | 4.0330021000000000       | -3.2875348999999998 | -1.4437153000000000      | O | 0.17568874E+01           | -0.10458953E+01     | 0.19000986E+01          |
| H | 3.1984048999999999       | -3.3314089000000000 | -0.9701948599999999      | C | 0.15236215E+01           | -0.17460771E+01     | 0.67536595E+00          |
| H | 4.6342686999999998       | -2.6237089000000000 | -0.99361542999999997     | C | 0.16416707E+01           | -0.31676548E+01     | 0.10542024E+01          |
| O | 1.3249135999999999       | -3.3103560000000002 | -2.3506323999999998      | O | 0.18502000E+01           | -0.14534936E+01     | 0.41198936E+01          |
| H | 1.1728171000000001       | -4.1508023999999999 | -2.7958436999999998      | C | 0.12578802E+00           | -0.14461836E+01     | 0.92452470E-01          |
| H | 1.3865977000000000       | -3.6389779000000000 | -1.4296888999999999      | O | -0.96557278E+00          | -0.14975987E+01     | 0.10620773E+01          |
| O | -1.0278654000000000      | -2.8212136999999999 | 5.0813402999999999       | O | 1.65974970000000001      | -4.0695274000000001 | 7.8781749999999998E-002 |
| H | -1.0811987000000001      | -3.7458008999999999 | 4.6787555000000003       | O | 1.5466830000000001       | -4.3338118999999997 | 3.3033207000000000      |
| H | -0.11120756000000000     | -2.7585709999999998 | 5.4690020000000003       | C | 0.18782788E+00           | -0.49041454E-02     | -0.50609505E+00         |
| O | -1.1957572999999999      | -7.0291079999999999 | 2.0312557999999998       | O | -0.10326978E+01          | 0.31033650E+00      | -0.10322346E+01         |
| H | -0.39796943000000001     | -7.4993508999999996 | 1.7750391999999999       | H | 0.22925681E+01           | -0.14362316E+01     | 0.29579084E-01          |
| H | -1.6696469000000000      | -7.7401109000000003 | 2.4791219999999998       | H | 0.37573503E+00           | 0.65789352E+00      | 0.30993547E+00          |
| O | 4.4832039000000004       | -2.9013274999999998 | 5.6016702000000000       | H | 0.96544118E+00           | 0.24597934E-01      | -0.12911228E+01         |
| H | 3.3385173000000001       | -2.9115848999999998 | 5.3650358000000000       | H | -0.17583072E+01          | 0.20259650E+00      | -0.36646624E+00         |
| H | 4.5615332000000004       | -2.2907867000000000 | 6.3504516999999998       | H | -0.15377074E+00          | -0.21026551E+01     | -0.65904997E+00         |
| O | 1.1344828000000000       | -8.9990561000000007 | 2.8118892999999998       | H | -0.51578517E+00          | -0.14518732E+01     | 0.19148752E+01          |
| H | 1.3798618000000000       | -8.1650205000000007 | 2.4107506000000001       | O | 1.2087014000000000       | -6.5381407999999999 | 1.6420461000000000      |
| H | 2.0042753000000002       | -9.4732094000000000 | 2.7342919000000001       | H | 1.2276467000000000       | -5.9996793999999998 | 2.4541510000000000      |
|   |                          |                     |                          | H | 1.5278081999999999       | -5.8177301999999997 | 1.0468575000000000      |
| C | 0.15025866E+01           | -0.33091353E+01     | 0.25947376E+01           | O | 4.2923251999999996       | -4.6206690999999998 | 0.71084336000000004     |
| C | 0.17600317E+01           | -0.19997639E+01     | 0.31498269E+01           | H | 4.1627470000000004       | -4.9006055999999996 | 1.6041850000000000      |
| O | 0.17457398E+01           | -0.10210112E+01     | 0.21408051E+01           | H | 3.4056402000000001       | -4.2614470999999998 | 0.45363428000000000     |
| O | 0.14467639E+01           | -0.17522008E+01     | 0.86504618E+00           | O | 3.9180476999999998       | -5.4873941999999998 | 3.2929586000000000      |
| C | 0.15438909E+01           | -0.32205881E+01     | 0.12293311E+01           | H | 4.2896846000000002       | -5.1245927000000000 | 4.0571770999999996      |
| O | 0.20439516E+01           | -0.15653943E+01     | 0.43245616E+01           | H | 2.9480803000000000       | -5.2708899999999996 | 3.3158287000000000      |
| C | 0.10338522E+00           | -0.13085786E+01     | 0.23816946E+00           | O | -0.94437565000000001     | -5.2856047999999998 | -0.25728441000000002    |
| O | -0.10001162E+01          | -0.14237939E+01     | 0.12036258E+01           | H | -1.8685678000000001E-002 | -5.1951003000000000 | 2.0833477000000000E-002 |
| O | 1.5337019999999999       | -4.1278879999999996 | 0.38284449999999998      | H | -1.14384170000000001     | -6.0286805000000001 | 0.38262492999999997     |
| O | 1.4662733999999999       | -4.4061367999999996 | 3.3751068000000002       | O | -1.0884053000000000      | -4.9409368000000002 | 3.8566360000000001      |
| C | 0.45020629E-01           | 0.95797117E-01      | -0.48004312E+00          | H | -0.11260129000000001     | -4.8135430000000001 | 3.5884922000000001      |
| O | -0.12033257E+01          | 0.41185885E+00      | -0.11356969E+01          | H | -1.2589192000000000      | -5.5840950999999999 | 3.0987917000000000      |
| H | 0.22713322E+01           | -0.15332997E+01     | 0.21368265E+00           | O | 0.51941004000000002      | -3.5456637000000000 | -2.5336772000000001     |
| H | 0.25513760E+00           | 0.88286235E+00      | 0.24384723E+00           | H | 0.94077507999999999      | -4.3156105000000000 | -2.9501037000000001     |
| H | 0.79612175E+00           | 0.14287797E+00      | -0.12773040E+01          | H | 0.75308845000000002      | -3.7245189999999999 | -1.6161894999999999     |
| H | -0.19314043E+01          | 0.27549939E+00      | -0.50909259E+00          | O | 4.1099582999999997       | -3.4298986999999999 | -1.7195361000000000     |
| H | -0.52626112E-01          | -0.19969149E+01     | -0.57431010E+00          | H | 3.2393030000000000       | -3.6663591000000002 | -1.3872812999999999     |
| H | -0.64546465E+00          | -0.21698619E+01     | 0.18691612E+01           | H | 4.5062816999999997       | -3.0103922000000001 | -0.92818409999999996    |
| O | 1.3417616999999999       | -6.7890701000000000 | 1.4952692999999999       | O | 1.3276439000000000       | -4.4495474000000002 | 6.1587005000000001      |
| H | 1.3826037000000000       | -6.0461131000000004 | 2.1169015999999998       | H | 2.2888343000000000       | -4.4924727999999998 | 6.2714805000000000      |
| H | 1.4149432000000000       | -6.2513867999999999 | 0.7215386799999999       | H | 1.3042627000000000       | -4.2826472000000004 | 5.2093261999999996      |
| O | 4.0820387000000000       | -5.6539035999999996 | 3.6110809000000001       | O | 4.4962999000000003       | -7.1602703999999999 | -0.59780672000000001    |
| H | 4.3744972000000004       | -4.9742663000000000 | 4.2499070000000003       | H | 4.1793034000000002       | -6.4875223999999996 | 8.1971137999999999E-002 |

|   |                     |                     |                          |   |                          |                     |                          |
|---|---------------------|---------------------|--------------------------|---|--------------------------|---------------------|--------------------------|
| H | 5.2627506000000004  | -6.6907624999999999 | -0.99813627000000005     | C | 0.34053405E+00           | 0.20428599E+00      | -0.10130456E+00          |
| O | 6.2364075000000003  | -3.6797764000000002 | 2.4057556999999998       | O | -0.90222195E+00          | 0.54414672E+00      | -0.79080484E+00          |
| H | 5.6078951000000004  | -3.8521314000000002 | 1.6939347000000000       | H | 0.24394351E+01           | -0.13713686E+01     | 0.25788775E+00           |
| H | 6.3686322000000004  | -4.5676335000000003 | 2.8105375000000001       | H | 0.27463775E+00           | 0.74427732E+00      | 0.90473652E+00           |
| O | -1.5237141000000001 | -7.1238529000000002 | 1.6505627000000000       | H | 0.11764860E+01           | 0.54724426E+00      | -0.70361034E+00          |
| H | -0.6755177599999997 | -7.5168600000000003 | 1.8490977000000000       | H | -0.16058572E+01          | 0.61069964E-01      | -0.34176223E+00          |
| H | -2.1929219999999998 | -7.6088427999999997 | 2.1917216000000002       | H | 0.29350359E+00           | -0.17103166E+01     | -0.91068062E+00          |
| O | 1.3858330000000001  | -8.8711584999999999 | 3.2738440000000000       | H | -0.79774878E+00          | -0.19127352E+01     | 0.17715092E+01           |
| H | 1.3996820000000001  | -8.1317339000000004 | 2.6058490999999999       | O | 1.8770781000000001       | -6.5244841999999998 | 1.7320907999999999       |
| H | 2.2115881000000002  | -9.3193640000000002 | 2.9686281999999999       | H | 1.7960035000000001       | -5.9554482000000002 | 2.5087000000000002       |
| C | 0.15105499E+01      | -0.32443828E+01     | 0.26064736E+01           | H | 1.8992015000000000       | -5.8239616999999999 | 1.0518797000000000       |
| C | 0.16990512E+01      | -0.19408369E+01     | 0.31782256E+01           | O | 4.3784460000000003       | -4.7440163999999996 | 1.2392192000000000       |
| O | 0.15975459E+01      | -0.94476619E+00     | 0.21922342E+01           | H | 3.9558472999999998       | -5.4926936000000000 | 1.7615784000000001       |
| C | 0.15739139E+01      | -0.15728235E+01     | 0.88730602E+00           | H | 3.5812392000000002       | -4.4951730000000003 | 0.7658586200000005       |
| C | 0.15940519E+01      | -0.30795837E+01     | 0.11929434E+01           | O | 3.8923958000000001       | -5.5248059999999996 | 4.0003612999999998       |
| O | 0.18171574E+01      | -0.15051904E+01     | 0.43496643E+01           | H | 4.4269249000000004       | -4.7555069999999998 | 4.4000135000000000       |
| C | 0.21905475E+00      | -0.12639742E+01     | 0.20532846E+00           | H | 3.0810431000000000       | -4.9965191000000004 | 3.7220787000000000       |
| O | -0.86227089E+00     | -0.15183285E+01     | 0.10612328E+01           | O | -1.0804043000000001      | -5.4597302000000001 | 3.8287148000000002       |
| O | 1.6891331000000001  | -3.9328723000000001 | 0.24200289000000000      | H | -9.8712539000000002E-002 | -5.3765507000000001 | 3.6778510999999998       |
| O | 1.4091681000000000  | -4.3097782999999996 | 3.3632536000000002       | H | -1.3562528000000000      | -5.9497416999999997 | 3.0598887000000001       |
| C | 0.15825870E+00      | 0.25394053E+00      | -0.25821701E+00          | O | -0.97944129000000002     | -5.2300373000000002 | -0.4138128200000003      |
| O | -0.93420843E+00     | 0.40723078E+00      | -0.11890956E+01          | H | -0.10324375000000000     | -5.0331948999999998 | -3.1565432999999997E-002 |
| H | 0.24434733E+01      | -0.13542067E+01     | 0.26781272E+00           | H | -1.2836350000000001      | -5.9347035000000004 | 0.21651751999999999      |
| H | 0.20336763E+00      | 0.10453018E+01      | 0.48704482E+00           | O | 3.5849443999999999       | -3.1123406000000000 | -1.3651780000000000      |
| H | 0.10927540E+01      | 0.425522440E+00     | -0.81324728E+00          | H | 2.9296467000000002       | -3.2786878000000002 | -0.6806104200000005      |
| H | -0.17548588E+01     | 0.12222943E+00      | -0.68030928E+00          | H | 4.0267410000000003       | -2.4059773999999998 | -0.8857899299999995      |
| H | 0.99693525E-01      | -0.17452473E+01     | 0.73699193E+00           | O | -0.9670830999999997      | -2.6859893000000001 | 4.8396338999999999       |
| H | -0.61003493E+00     | -0.15269716E+01     | 0.20340987E+01           | H | -0.8071654999999998      | -3.5126496999999999 | 4.3298809000000000       |
| O | 1.3120660000000000  | -6.3837751000000003 | 1.8687206000000001       | H | -6.9845163000000002E-002 | -2.4703516000000000 | 4.9915867000000000       |
| H | 1.3014036000000000  | -5.0910067599999999 | 2.5124564999999999       | O | 1.5798582999999999       | -4.4039529000000002 | 6.3017909999999997       |
| H | 1.5734562000000001  | -5.8407963000000001 | 1.1725660000000000       | H | 2.1280659000000002       | -5.1888529999999999 | 6.1128704000000003       |
| O | 4.1916595000000001  | -4.9420295000000003 | 0.87785175000000004      | H | 1.3149493000000001       | -4.2685143999999999 | 5.3590470999999997       |
| H | 3.8874930999999999  | -5.0910067599999997 | 1.7626596000000001       | O | 0.86468255000000005      | -3.4524172000000002 | -2.5568276000000001      |
| H | 3.2576724000000001  | -4.6114268999999997 | 0.6279150199999999       | H | 1.5998899900000000       | -3.9406593999999999 | -2.9062139000000000      |
| O | 3.8285070999999999  | -5.2668083999999999 | 3.6293785999999999       | H | 0.90969213000000004      | -3.7681651999999999 | -1.6265889000000000      |
| H | 4.1432976000000004  | -4.5198461999999999 | 4.2320802999999998       | O | 3.9144304000000001       | -7.0756539999999996 | -0.5843796700000002      |
| H | 2.8456758000000000  | -5.0834333000000003 | 3.4866780999999998       | H | 3.3464467000000000       | -6.9267159999999999 | 0.21176033999999999      |
| O | -1.2358579999999999 | -5.2460839000000004 | 3.6611348000000001       | H | 4.7677671999999998       | -7.2600219999999999 | -0.23683429000000000     |
| H | -0.3399098800000000 | -4.9260126000000000 | 3.3882191000000002       | O | 1.4328959999999999       | -8.6290558999999991 | 3.4264716000000002       |
| H | -1.4235468000000000 | -5.9068157000000001 | 2.9898028999999999       | H | 1.7541635000000000       | -7.8339936000000003 | 2.9768189999999999       |
| O | -0.9626052099999999 | -5.3607703999999998 | -0.43147655000000001     | H | 1.9128706000000000       | -9.2655869000000006 | 2.8968340000000001       |
| H | -0.1017794600000000 | -5.1363940000000001 | -2.7034656000000001E-002 | O | 4.2687033000000003       | -3.2257603000000001 | 5.5030231000000001       |
| H | -1.2463120000000001 | -6.0790744999999999 | 0.21765298000000000      | H | 3.3208628999999998       | -3.2210489999999999 | 5.4481431999999996       |
| O | 1.3427004000000000  | -4.0825506000000003 | 5.9578844999999996       | H | 4.4126475999999997       | -2.4960410000000000 | 6.1744326999999997       |
| H | 2.1733248999999999  | -4.5192418999999999 | 6.1388951000000000       | C | 0.16888298E+01           | -0.32565825E+01     | 0.25625045E+01           |
| H | 1.3475193999999999  | -4.1278094999999997 | 4.9868446999999998       | O | 0.16794285E+01           | -0.19219012E+01     | 0.32017489E+01           |
| O | 3.7752555999999999  | -3.2626267000000002 | -1.7325771000000001      | C | 0.16061273E+01           | -0.93546956E+00     | 0.22784840E+01           |
| H | 3.0042496000000001  | -3.5444273000000002 | -1.2013480999999999      | C | 0.14525264E+01           | -0.15346256E+01     | 0.91779883E+00           |
| H | 4.3086045000000004  | -2.7782461999999999 | -1.1255160000000000      | C | 0.14854087E+01           | -0.30791256E+01     | 0.11783066E+01           |
| O | 0.4511670800000000  | -3.4341238000000001 | -2.6355197000000001      | O | 0.17168852E+01           | -0.16657862E+01     | 0.44187640E+01           |
| H | 1.1142010000000000  | -3.8706502999999999 | -3.2249154000000000      | C | 0.14193906E+00           | -0.11477384E+01     | 0.29960819E+00           |
| H | 0.69053123000000005 | -3.8595036000000000 | -1.7626567000000000      | O | -0.98865256E+00          | -0.16805685E+01     | 0.10025597E+01           |
| O | 3.9868549999999998  | -3.4761926999999999 | 5.5225302000000003       | O | 1.4760275000000000       | -3.9637916000000000 | 0.23359288000000000      |
| H | 3.0852762999999999  | -3.3237686000000002 | 5.1600390999999997       | O | 1.6440405000000000       | -4.3346584999999997 | 3.3601752000000000       |
| H | 4.2679577999999996  | -2.5522783000000002 | 5.6116653999999997       | C | 0.21140425E-01           | 0.38622703E+00      | 0.16941869E+00           |
| O | -1.1349020999999999 | -2.2749335999999998 | 4.8268483000000000       | O | -0.97467650E+00          | 0.87298278E+00      | -0.70783204E+00          |
| H | -1.1478347000000000 | -3.2218949000000001 | 4.6577469999999996       | H | 0.23090388E+01           | -0.12209476E+01     | 0.37734982E+00           |
| H | -0.2004832600000000 | -2.0774468000000001 | 4.6731047999999999       | H | -0.94858064E-01          | 0.81113715E+00      | 0.11523804E+01           |
| O | 1.3256178000000001  | -8.8745700999999997 | 3.2160462999999999       | H | 0.95414825E+00           | 0.77423044E+00      | -0.19604772E+00          |
| H | 1.3364119999999999  | -9.7804040000000003 | 2.8749937000000001       | H | -0.17554050E+01          | 0.78808920E+00      | -0.24121295E+00          |
| H | 2.0180994999999999  | -9.2440668000000006 | 2.6740629999999999       | H | 0.26374438E+00           | -0.15422003E+01     | -0.73509788E+00          |
| O | 4.3616552999999998  | -7.2556938000000004 | -0.5304038199999997      | H | -0.69798635E+00          | -0.23654992E+01     | 0.16195664E+01           |
| H | 4.1864204999999997  | -6.2667954000000003 | -0.35676898000000001     | O | 1.8367434000000000       | -6.3992623000000002 | 1.6984222000000000       |
| H | 4.8740816000000002  | -7.3542696999999997 | 0.29290156000000001      | H | 1.7904944000000000       | -5.5917447999999998 | 2.3361402000000000       |
| C | 0.15157770E+01      | -0.33074633E+01     | 0.26855336E+01           | H | 1.7630988999999999       | -5.8366055000000001 | 0.92600415000000003      |
| C | 0.17023073E+01      | -0.18763114E+01     | 0.31529444E+01           | O | 4.0054689000000003       | -5.6971752000000002 | 3.4195538000000001       |
| O | 0.16319375E+01      | -0.10254394E+01     | 0.20958922E+01           | H | 3.4583385999999997       | -4.8513653999999997 | 3.8632659000000000       |
| C | 0.15684757E+01      | -0.17337873E+01     | 0.82420036E+00           | O | 4.0075265000000000       | -5.4557371700000003 | 3.4437063000000001       |
| C | 0.15512647E+01      | -0.31830480E+01     | 0.12596751E+01           | H | -0.9928342000000000      | -5.1035953000000003 | -0.40577348000000002     |
| O | 0.18313202E+01      | -0.14021944E+01     | 0.43082776E+01           | H | -0.17381693000000001     | -4.8187981000000004 | 1.5378085000000000E-002  |
| C | 0.30377997E+00      | -0.12578918E+01     | 0.96087325E-01           | H | -1.31539230000000001     | -5.7700304999999998 | 0.16592804000000000      |
| O | -0.91391346E+00     | -0.17156838E+01     | 0.76957509E+00           | O | -1.0533553000000000      | -5.2406338000000003 | 3.7525921000000002       |
| O | 1.5217159000000000  | -4.1387887000000001 | 0.29285106000000000      | H | -0.13704864000000000     | -4.8671077000000000 | 3.7108683999999998       |
| O | 1.5018138000000001  | -4.3695995999999999 | 3.5306955000000002       | H | -1.0820372000000000      | -5.8726513000000002 | 2.9870964999999998       |
|   |                     |                     |                          | O | 4.7807382000000000       | -4.7272501000000000 | 0.90762810000000005      |

|   |                          |                     |                      |   |                          |                     |                          |
|---|--------------------------|---------------------|----------------------|---|--------------------------|---------------------|--------------------------|
| H | 4.3351984000000003       | -5.1132381000000002 | 1.7299526000000001   | H | 3.5040271999999999       | -7.4233269999999996 | 0.33643120999999998      |
| H | 4.0284478000000004       | -4.5367440999999999 | 0.35758063000000001  | H | 4.9527368000000003       | -7.4393976000000004 | 0.39196646000000002      |
| O | 3.5949874999999998       | -3.0831178000000001 | -1.4559949999999999  |   |                          |                     |                          |
| H | 2.8267193000000002       | -3.3921389999999998 | -0.9544372199999998  | C | 0.15483187E+01           | -0.33747145E+01     | 0.27016728E+01           |
| H | 4.0768221000000002       | -2.5683012000000001 | -0.77393467000000005 | C | 0.17090685E+01           | -0.20596923E+01     | 0.34041706E+01           |
| O | 1.3360040000000000       | -4.6164692000000001 | 6.1262622999999996   | O | 0.16359573E+01           | -0.10979792E+01     | 0.24359403E+01           |
| H | 2.1288387000000002       | -5.0274912000000000 | 6.4746223000000001   | C | 0.14752693E+01           | -0.16427269E+01     | 0.11213146E+01           |
| H | 1.5189733999999999       | -4.6141762999999996 | 5.1770280000000000   | C | 0.15544418E+01           | -0.30904688E+01     | 0.13049437E+01           |
| O | 0.8616175799999999       | -3.2029437000000001 | -2.4947263000000000  | O | 0.17821660E+01           | -0.17745815E+01     | 0.46335505E+01           |
| H | 1.3162543000000000       | -3.9234963999999999 | -3.0084124000000001  | C | 0.11440298E+00           | -0.10508081E+01     | 0.54188130E+00           |
| H | 0.95957161000000002      | -3.5549558000000001 | -1.5991865999999999  | O | -0.91629883E+00          | -0.14247355E+01     | 0.14775118E+01           |
| O | 1.2305667000000000       | -8.6456719000000000 | 3.3068420000000001   | O | 1.6529190000000000       | -3.9453198000000000 | 0.32888895000000001      |
| H | 1.3497869000000000       | -7.7624047999999997 | 2.8795123000000000   | O | 1.5796804000000000       | -4.5831473999999996 | 3.2068368999999999       |
| H | 1.9180881999999999       | -9.1020371999999998 | 2.8898609999999998   | C | 0.18544692E-01           | 0.37890887E+00      | 0.19080207E+00           |
| O | -0.9715829400000001      | -2.5601509999999998 | 4.6059171000000001   | O | -0.11241884E+01          | 0.65162413E+00      | -0.56048495E+00          |
| H | -1.1614241999999999      | -3.4947561000000000 | 4.4027962000000000   | H | 0.22653015E+01           | -0.11546879E+01     | 0.45292733E+00           |
| H | -4.6074316999999997E-002 | -2.5336922999999998 | 4.9471134000000001   | H | 0.17393530E-01           | 0.90500852E+00      | 0.11241747E+01           |
| O | 4.1371564999999997       | -3.3512054000000000 | 5.3155747000000000   | H | 0.81357558E+00           | 0.27879998E+00      | -0.45238415E+00          |
| H | 1.3229549999999998       | -2.9007839000000000 | 5.0184053000000004   | H | -0.18906237E+01          | 0.029434530E+00     | -0.20127393E+01          |
| H | 4.3179021000000004       | -2.7190720200000000 | 6.0188122999999996   | H | -0.33611490E-01          | -0.16906582E+01     | -0.35037096E+00          |
| O | -1.3083313999999999      | -6.9696021999999997 | 1.6048137000000000   | H | -0.51591539E+00          | -0.20047498E+01     | 0.21041059E+01           |
| H | -0.5857292899999996      | -7.6268110000000000 | 1.4376848000000000   | O | 0.28038560000000001      | -6.5589664000000001 | 1.3788828000000000       |
| H | -2.0971142999999999      | -7.4680206000000000 | 1.8712629000000001   | H | 0.20626091999999998      | -6.2764565000000001 | 2.3560821000000000       |
|   |                          |                     |                      | H | 1.8663215000000000       | -5.6651718000000004 | 1.0007275000000000       |
| C | 0.17519745E+01           | -0.32884620E+01     | 0.25457687E+01       | O | -0.89603668999999997     | -5.2130280000000004 | -8.9554815999999995E-002 |
| C | 0.17583701E+01           | -0.20097804E+01     | 0.31312196E+01       | H | 7.9200671000000000E-002  | -5.1598895900000002 | 0.14792701999999999      |
| O | 0.16125219E+01           | -0.06718985E+00     | 0.22098383E+01       | H | -1.1500946999999999      | -5.7018680000000002 | 0.67866645999999997      |
| C | 0.15571217E+01           | -0.15414050E+01     | 0.88700918E+00       | O | 4.0215623999999996       | -5.3544388999999999 | 3.8251998000000000       |
| C | 0.17891280E+01           | -0.30150497E+01     | 0.11293366E+01       | H | 4.3151295999999997       | -4.6655610999999997 | 4.4888310999999996       |
| O | 0.18203013E+01           | -0.17603879E+01     | 0.43489228E+01       | H | 3.0951403000000002       | -5.0583584999999998 | 3.7001023000000002       |
| C | 0.27696503E+00           | -0.11308656E+01     | 0.31000532E+00       | O | 4.6846182000000001       | -4.1797187999999998 | 1.1847369000000001       |
| O | -0.85038430E+00          | -0.15127413E+01     | 0.11366807E+01       | H | 4.4133103000000000       | -4.5184593000000000 | 2.0313918000000002       |
| O | 1.7581728999999999       | -3.9655741999999998 | 0.23241253000000001  | H | 3.9797009000000001       | -4.4353598999999999 | 0.54649950999999997      |
| O | 1.6602295000000000       | -4.4318005000000003 | 3.1796318600000001   | O | -1.0818350999999999      | -5.4298698999999999 | 3.6386801000000002       |
| C | 0.16904468E+00           | 0.32583372E+00      | 0.11239126E+00       | H | -8.3133472000000000E-002 | -5.4287451000000004 | 3.4737670999999999       |
| O | -0.10357582E+01          | 0.65646108E+00      | -0.62994065E+00      | H | -1.3700068000000001      | -6.0121883000000000 | 2.8978025000000001       |
| H | 0.24061856E+01           | -0.10949815E+01     | 0.35297667E+01       | O | 3.5719408000000001       | -3.5877997000000001 | -1.5384918000000001      |
| H | 0.33013261E-01           | 0.86330857E+00      | 0.10688593E+01       | H | 2.8925385000000001       | -3.6618426999999998 | -0.8864571000000000      |
| H | 0.11100243E+01           | 0.64950591E+00      | -0.44674800E+00      | H | 4.0940021000000000       | -2.9502578000000002 | -0.97384444999999997     |
| H | -0.17415417E+01          | 0.10008816E+01      | -0.56124070E-01      | O | 0.77335434999999997      | -3.5492830999999998 | -2.1829952000000001      |
| H | 0.16397196E+00           | -0.16551054E+01     | -0.58269832E+00      | H | 1.3383483000000000       | -4.0527319000000004 | -2.7740359999999999      |
| H | -0.55441797E+00          | -0.18326531E+01     | 0.19975519E+01       | H | 1.2587774000000000       | -3.5820424000000002 | -1.3763723000000001      |
| O | 1.9525680000000001       | -6.5301139000000002 | 1.3847339000000001   | O | 1.5227434000000000       | -4.2670497999999997 | 6.1381294000000004       |
| H | 1.6579522000000000       | -5.9073780999999999 | 2.0398399999999999   | H | 2.1552321999999999       | -4.8961857000000002 | 6.4426081000000002       |
| H | 2.0581569000000002       | -5.9624841000000002 | 0.6098761799999999   | H | 1.5443568999999999       | -4.4567002999999996 | 5.1554497000000001       |
| O | 4.6657945999999999       | -4.4886144000000003 | 1.1685460999999999   | O | -1.1054551300000000      | -2.7867189000000000 | 4.8226189000000002       |
| H | 3.9514265000000002       | -4.8702230000000002 | 1.7784466999999999   | H | -1.0363606999999999      | -3.5759726000000001 | 4.2215900000000000       |
| H | 4.1721577999999999       | -4.4433389999999998 | 0.30865196000000000  | H | -8.9231560000000001E-002 | -2.6726219000000002 | 4.9324254999999999       |
| O | 4.0877084999999997       | -5.4979727000000000 | 3.6942840000000001   | O | 4.4744641999999999       | -7.0777448999999999 | -0.43990812000000001     |
| H | 4.5514562999999999       | -4.8969187999999999 | 4.2795896999999998   | H | 3.7149530999999998       | -6.9218080000000004 | 0.14012622000000000      |
| H | 3.2723369999999998       | -5.0215012000000003 | 3.4594086000000002   | H | 4.9030918999999997       | -7.7458403999999996 | 0.10611286000000000      |
| O | -0.8691594999999997      | -5.3530914000000003 | -0.25872432000000001 | O | 1.4723970000000000       | -8.6781579000000004 | 2.9762751000000001       |
| H | 2.8990417000000001E-002  | -4.9730087000000003 | -0.10819328000000000 | H | 1.9166745000000001       | -7.9814502000000003 | 2.4303417000000000       |
| H | -1.0505183000000000      | -5.7579723999999999 | 0.60983582999999997  | H | 2.1380300000000001       | -9.3575500999999992 | 2.9999794999999998       |
| O | -0.9874051600000000      | -5.2913397000000000 | 3.5312679999999999   | O | 4.3834507000000000       | -3.0880112999999998 | 5.5177768000000000       |
| H | 1.6204887000000001E-002  | -5.3251571000000002 | 3.3746016000000001   | H | 3.4095412000000000       | -2.9890663000000002 | 5.2872966999999997       |
| H | -1.2516152000000000      | -5.8456215000000000 | 2.8219732999999998   | H | 4.4633792999999997       | -2.4184543000000001 | 6.2886014000000001       |
| O | 3.9107210000000001       | -3.4487530000000000 | -1.5193793000000000  |   |                          |                     |                          |
| H | 3.0139298999999999       | -3.4739004000000002 | -1.1126822000000001  | C | 0.15506501E+01           | -0.35051760E+01     | 0.26782111E+01           |
| H | 4.2888520000000003       | -2.8256076000000003 | -0.88468621000000003 | C | 0.15213863E+01           | -0.22124750E+01     | 0.33464953E+01           |
| O | 0.7007320400000000       | -3.4616514000000000 | -2.4286186000000001  | O | 0.16148934E+01           | -0.11208366E+01     | 0.24333501E+01           |
| H | 1.3294808000000000       | -3.9997821999999998 | -2.9819914000000001  | O | 0.15113740E+01           | -0.17192408E+01     | 0.11371520E+01           |
| H | 1.0221330000000000       | -3.6902875000000002 | -1.5099199999999999  | C | 0.16044554E+01           | -0.32000468E+01     | 0.13022617E+01           |
| O | 1.3700672000000000       | -4.6046376000000002 | 6.0838293999999999   | O | 0.14953266E+01           | -0.19623184E+01     | 0.45946547E+01           |
| H | 2.0462817000000002       | -5.2495618000000004 | 6.3510149000000000   | C | 0.15344018E+00           | -0.13163197E+01     | 0.51515910E+00           |
| H | 1.6515480000000000       | -4.4853605999999999 | 5.1649688999999999   | O | -0.99788032E+00          | -0.16570645E+01     | 0.13603380E+01           |
| O | 1.3178688999999999       | -8.3917704000000004 | 3.2417562000000002   | O | 1.7651332000000000       | -3.9915403000000000 | 0.30470638000000000      |
| H | 1.3977975000000000       | -7.8092136999999999 | 2.4880171999999998   | O | 1.6734142000000001       | -4.6985280999999999 | 3.2227926999999998       |
| H | 1.9037542999999999       | -9.1082555000000003 | 3.0773313999999998   | C | 0.12932069E+00           | 0.18405185E+00      | 0.36461593E+00           |
| O | -1.1407255000000001      | -2.8602319000000000 | 4.6655756000000004   | O | -0.92650081E+00          | 0.81438884E+00      | -0.42593312E+00          |
| H | -1.2003104000000000      | -3.7544281000000002 | 4.2052860000000001   | H | 0.22486046E+01           | -0.13488583E+01     | 0.39033941E+00           |
| H | -0.20046736000000001     | -2.8075190000000001 | 4.9532800000000003   | H | 0.72524018E-01           | 0.61732641E+00      | 0.13724034E+01           |
| O | 4.1685812999999996       | -3.2636927000000002 | 5.4901279000000001   | H | 0.10452457E+01           | 0.40559829E+00      | -0.23092940E+00          |
| H | 3.5059741999999998       | -2.8638005999999998 | 4.9253137000000002   | H | -0.16963994E+01          | 0.15081617E+00      | -0.27571068E+00          |
| H | 4.1034214999999996       | -2.6907719000000001 | 6.2961904999999998   | H | 0.96523946E-01           | -0.19893633E+01     | -0.35361004E+00          |
| O | 4.2673231999999999       | -7.2182399000000004 | -0.21797616000000000 | H | -0.85208973E+00          | -0.25353273E+01     | 0.17930459E+01           |

|   |                         |                     |                          |   |                      |                     |                         |
|---|-------------------------|---------------------|--------------------------|---|----------------------|---------------------|-------------------------|
| O | 1.8681633000000000      | -6.4596261999999998 | 1.1262460999999999       | O | 1.2051371000000000   | -4.6486394000000004 | 6.0674969000000001      |
| H | 1.8223965000000000      | -5.9310793999999998 | 1.9450631000000000       | H | 2.0437422999999999   | -5.1613916000000000 | 6.1967131000000002      |
| H | 1.9032794000000000      | -5.7514966999999997 | 0.4944034299999998       | H | 1.0961072999999999   | -4.4797447000000004 | 5.1445198999999997      |
| O | -1.0681149999999999     | -5.1168874000000004 | 0.28965232000000002      | O | 1.4220071999999999   | -8.4969149999999996 | 2.8466821000000002      |
| H | -0.14474486000000000    | -5.2115980999999998 | 0.58510114000000002      | H | 1.7965392000000000   | -7.7264103999999998 | 2.3908564999999999      |
| H | -1.4746847999999999     | -5.7063898999999996 | 0.93150937000000000      | H | 2.1203542999999998   | -9.1365420999999998 | 2.8108369000000000      |
| O | 4.8384958999999998      | -4.3683015000000003 | 1.3548886000000000       | O | 4.1240022999999999   | -7.2016071999999998 | -0.30892034000000002    |
| H | 4.5256002999999998      | -4.9863352000000001 | 2.0495123999999998       | H | 3.4257266000000000   | -7.0717113999999999 | 0.40427764999999999     |
| H | 4.0313458000000004      | -3.8350095999999998 | 1.1875852000000000       | H | 4.9030174999999998   | -7.1014052000000003 | 0.23330550000000000     |
| O | 4.1181726000000003      | -5.2210416999999998 | 3.9667048999999999       | O | -1.1760614000000000  | -2.7859026000000000 | 4.7973071000000000      |
| H | 4.2302657000000004      | -4.3078759000000000 | 4.2280905000000004       | H | -1.3153816000000000  | -3.7292141000000001 | 4.4365062999999996      |
| H | 3.1673252000000001      | -5.1245548000000003 | 3.5794291999999999       | H | -0.27536291000000002 | -2.8459477999999998 | 5.0398693000000003      |
| O | -1.0471600999999999     | -5.2156206999999997 | 3.4990649000000000       | O | -2.1537381000000000  | -3.7098133000000000 | -1.6147479000000000     |
| H | -0.14452008000000000    | -5.2770238999999997 | 3.1928084000000001       | H | -1.3767688000000000  | -3.5375549999999998 | -2.1473445000000000     |
| H | -1.4596625000000001     | -5.9750952000000002 | 3.0850749999999998       | H | -1.8022863000000000  | -4.2695625000000001 | -0.84702012000000004    |
| O | 3.6087319999999998      | -3.2269899000000000 | -1.6618278000000000      | C | 0.15158330E+01       | -0.34589808E+01     | 0.26396849E+01          |
| H | 3.0075485999999998      | -3.6941929000000000 | -1.1087115000000001      | C | 0.16863780E+01       | -0.22461615E+01     | 0.33413523E+01          |
| O | 4.1189372999999998      | -2.6897872999999999 | -1.0298312000000001      | C | 0.18002204E+01       | -0.11067104E+01     | 0.25120278E+01          |
| H | 1.3976729000000001      | -4.6259747000000004 | 6.0515990999999998       | C | 0.17007551E+01       | -0.16099246E+01     | 0.11398238E+01          |
| H | 2.0866845999999999      | -5.2622720000000003 | 6.1824361000000003       | C | 0.16567470E+01       | -0.30997499E+01     | 0.12513009E+01          |
| H | 1.5030304999999999      | -4.6132600999999998 | 5.0651380000000001       | O | 0.17008524E+01       | -0.19972147E+01     | 0.45494520E+01          |
| O | 0.75315748000000005     | -3.2022170000000001 | -3.3221303999999998      | O | 0.30419570E+00       | -0.11117393E+01     | 0.54076210E+00          |
| H | 1.2664419000000000      | -3.8667945000000001 | -3.0308136000000001      | C | -0.76758367E+00      | -0.14542247E+00     | 0.13870272E+01          |
| H | 1.1564830000000001      | -3.8355855000000001 | -1.5267157000000000      | O | 1.6038599000000000   | -3.9453600000000000 | 0.23388734999999999     |
| O | 1.4821005000000000      | -8.5136856000000005 | 2.8669140099999998       | O | 1.3538349999999999   | -4.6992500000000000 | 3.1703006000000000      |
| H | 1.3828971999999999      | -7.8729442000000001 | 2.1533340999999999       | C | 0.28828249E+00       | 0.34146934E+00      | 0.24283456E+00          |
| H | 2.4322187999999998      | -8.8282603000000002 | 2.9002837000000001       | O | -0.92372000E+00      | 0.74121302E+00      | -0.48791258E+00         |
| O | 4.2072183000000001      | -7.2340695999999998 | -0.5348371499999998      | H | 0.24595902E+01       | -0.12385365E+01     | 0.09534725E+00          |
| H | 3.5495079000000000      | -6.9348739999999998 | 7.4499976999999995E-002  | H | 0.31259439E+00       | 0.92032315E+00      | 0.11799387E+01          |
| H | 5.0071333999999998      | -7.1632036000000001 | -9.6970171999999997E-003 | H | 0.11062474E+01       | 0.50780827E+00      | -0.44627086E+00         |
| O | -1.2690564000000000     | -2.7890815999999998 | 4.7295642999999998       | H | -0.16422394E+01      | 0.34565694E+00      | 0.37200514E-01          |
| H | -1.0761896000000000     | -3.4464009000000000 | 4.0571839000000001       | H | 0.18039835E+00       | -0.15854332E+01     | -0.42486555E+00         |
| H | -0.43201034999999999    | -2.3035923000000000 | 4.8152280999999997       | H | -0.42245860E+00      | -0.19027129E+01     | 0.22105965E+01          |
| O | 5.3523904000000000      | -7.3300286999999997 | 7.7884507799999999       | O | 2.1871029000000002   | -6.4647354999999997 | 1.3667142999999999      |
| H | 4.9772017999999996      | -6.4885885999999999 | 3.1789502000000001       | H | 1.8878002000000000   | -5.9493806999999999 | 2.1271491000000000      |
| H | 6.3146513000000004      | -7.1073130000000004 | 2.8492324999999998       | H | 1.8603480000000000   | -5.8396879999999998 | 0.64694123999999997     |
| C | 0.14503695E+01          | -0.33998685E+01     | 0.26051323E+01           | O | -1.1747258000000000  | -5.0546575999999996 | 0.13550688000000000     |
| C | 0.16150657E+01          | -0.21456922E+01     | 0.33589209E+01           | H | -0.33910794999999999 | -4.5981747000000004 | 0.35756990000000000     |
| O | 0.17327150E+01          | -0.11081148E+01     | 0.24997411E+01           | H | -1.1333340000000001  | -5.7574832999999996 | 0.87423814000000000     |
| C | 0.15350080E+01          | -0.15912319E+01     | 0.10993454E+01           | O | -1.2498600000000000  | -4.8536573000000001 | 3.7982691000000002      |
| C | 0.16315317E+01          | -0.30865102E+01     | 0.12514258E+01           | H | -0.27410665000000001 | -4.6712729000000000 | 3.5581765999999999      |
| O | 0.17796143E+01          | -0.19106153E+01     | 0.45596217E+01           | H | -1.3178098000000000  | -5.6191725000000002 | 3.1862202000000002      |
| C | 0.27507257E+00          | -0.11351878E+01     | 0.45014312E+00           | O | 4.6040413999999998   | -4.4277296000000002 | 1.0867108999999999      |
| O | -0.82199073E+00         | -0.15606417E+01     | 0.13066348E+01           | H | 4.0774293999999998   | -5.2233967999999997 | 1.2999817000000000      |
| O | 1.6894828000000000      | -3.8915456000000002 | 0.22889406000000001      | H | 3.9345549000000002   | -3.7973088000000002 | 0.76507767999999998     |
| O | 1.3682190000000001      | -4.5860291000000002 | 3.2250076999999999       | O | 3.8522238999999998   | -5.3285682000000003 | 4.0992911999999997      |
| C | 0.23775259E+00          | 0.46285814E+00      | 0.37156887E+00           | H | 4.0325169000000004   | -4.4206868999999998 | 4.3616514999999998      |
| O | -0.94359845E+00         | 0.85846393E+00      | -0.26188922E+00          | H | 2.9838947999999998   | -5.3440329999999996 | 3.7490391000000001      |
| H | 0.23016497E+01          | -0.11704121E+01     | 0.50977090E+00           | O | 0.94861767000000001  | -3.5777206000000001 | -2.1619505000000000     |
| H | 0.33255195E+00          | 0.99709323E+00      | 0.13381281E+01           | H | 1.2768619999999999   | -3.8069535999999999 | -2.6783478999999999     |
| H | 0.11306565E+01          | 0.73251766E+00      | -0.25755740E+00          | H | 0.89638746999999996  | -3.5963376999999999 | -1.2200739000000000     |
| H | -0.16942285E+01         | 0.28343462E+00      | -0.30060106E-01          | O | 3.4385995000000000   | -3.2026091999999999 | -1.6265605000000001     |
| H | 0.22015150E+00          | -0.15413295E+01     | -0.54943516E+00          | H | 2.8514599999999999   | -3.4906527999999999 | -0.91732033999999996    |
| H | -0.59856934E+00         | -0.12824561E+01     | 0.22063523E+01           | H | 4.0093094000000002   | -2.6696697000000000 | -1.0149124000000000     |
| O | 2.1567194999999999      | -6.4114599999999999 | 1.2888393000000000       | O | 1.1400759000000000   | -4.4247924000000003 | 6.1228841000000003      |
| H | 1.8673181000000001      | -5.8910353000000004 | 2.0300319999999998       | H | 1.8297063000000000   | -4.8797879099999997 | 6.4565028000000000      |
| H | 1.9695749000000000      | -5.7846736999999999 | 0.6414448299999997       | H | 1.0673352000000000   | -4.6649199000000001 | 5.1883942000000003      |
| O | -0.93554172999999996    | -5.2556776999999997 | 0.12546811999999999      | O | 4.2240555000000004   | -7.4228231999999998 | -0.28800229999999999    |
| H | 1.6536808000000000E-002 | -4.9456357999999998 | 0.34990769999999999      | H | 3.3839104999999998   | -7.2729983000000002 | 8.0057606000000003E-002 |
| H | -1.1042330000000000     | -5.8563663000000004 | 0.8619592299999997       | H | 4.7514529000000003   | -7.2589513999999999 | 0.49698753000000001     |
| O | 4.7180793000000003      | -4.4666889999999997 | 1.3009633000000000       | O | 1.2401312000000000   | -8.6825796999999998 | 3.1128135000000001      |
| H | 4.2402381000000000      | -4.8994913000000002 | 0.57225908000000003      | H | 1.4989992999999999   | -8.1509087999999998 | 2.2812481999999998      |
| H | 3.9842437999999998      | -3.8869448000000002 | 1.6567722000000000       | H | 2.1119010999999999   | -8.8525250000000000 | 3.4264983000000000      |
| O | -1.1908327000000001     | -5.2935302999999996 | 3.5805739999999999       | O | -1.1771558000000000  | -2.2313095000000001 | 4.5489573999999999      |
| H | -0.23092443000000001    | -5.1035814000000004 | 3.5274820999999998       | H | -1.3522008999999999  | -3.1192742999999998 | 4.3013956000000002      |
| H | -1.3138755000000000     | -5.9865487999999996 | 2.9158428999999999       | H | -0.2792211399999998  | -2.4171414000000002 | 4.7188799000000001      |
| O | 3.7687365000000002      | -5.1454560999999996 | 4.3900271999999996       | O | -3.0704202000000000  | -2.4974454000000001 | 0.5325043999999998      |
| H | 3.9876109000000000      | -4.2154056999999998 | 4.5214685000000001       | H | -2.7659783999999998  | -2.5681927999999998 | -0.40420429000000002    |
| H | 2.9323937999999998      | -5.1025998000000001 | 3.9133838000000001       | H | -2.2315358000000001  | -2.4884987999999999 | 0.95151743000000000     |
| O | 0.6683087199999997      | -3.8028336000000000 | -2.2450614999999998      | C | 0.16167241E+01       | -0.32651595E+01     | 0.25896290E+01          |
| H | 1.4236104000000001      | -4.2845145999999996 | -2.7039236000000000      | C | 0.18584688E+01       | -0.20122833E+01     | 0.32135015E+01          |
| H | 0.94911677999999999     | -3.8660494000000001 | -1.2757886000000001      | O | 0.18603033E+01       | -0.95091262E+00     | 0.22522657E+01          |
| O | 3.6253617000000000      | -3.2452511999999998 | -1.6121521000000001      | C | 0.15567084E+01       | -0.15331939E+01     | 0.97245961E+00          |
| H | 2.8588624999999999      | -3.4675913999999999 | -0.96695582000000002     | C | 0.14562771E+01       | -0.30507545E+01     | 0.12407698E+01          |
| H | 4.0813560000000004      | -2.5898034000000001 | -1.1042479999999999      |   |                      |                     |                         |

|   |                      |                     |                          |   |                      |                     |                         |
|---|----------------------|---------------------|--------------------------|---|----------------------|---------------------|-------------------------|
| O | 0.20696705E+01       | -0.17356032E+01     | 0.43811755E+01           | H | -1.4786824999999999  | -6.0057396000000001 | 0.94848533000000002     |
| C | 0.26457452E+00       | -0.99713742E+00     | 0.37141566E+00           | O | 4.6370243000000002   | -4.3059821999999999 | 1.1932474000000000      |
| O | -0.83363645E+00      | -0.12507020E+01     | 0.13230876E+01           | H | 3.7982659000000001   | -3.8740676999999999 | 0.94692829999999995     |
| O | 1.3575699999999999   | -3.8818345999999999 | 0.21153611999999999      | H | 4.3457071999999997   | -4.8054429000000001 | 1.9314378000000001      |
| O | 1.5354614000000000   | -4.3818913000000004 | 3.3622461000000001       | O | 4.0308999999999999   | -5.2369449000000001 | 3.7026292000000001      |
| C | 0.25954511E+00       | 0.52851996E+00      | 0.10753386E+00           | H | 4.3816531999999997   | -4.4003034999999997 | 4.0813060999999999      |
| O | -0.10399651E+01      | 0.89386345E+00      | -0.28724430E+00          | H | 3.9525821999999997   | -4.9525821999999997 | 3.7649313000000002      |
| H | 0.23890528E+01       | -0.12665674E+01     | 0.30249773E+00           | O | 3.2143259999999998   | -3.2078327000000000 | -1.5869396000000000     |
| H | 0.65365948E+00       | 0.11252097E+01      | 0.10428614E+01           | H | 2.5154003000000000   | -3.4452791999999999 | -0.96602104000000000    |
| H | 0.10461547E+01       | 0.80818720E+00      | -0.68984413E+00          | H | 3.7209685000000001   | -2.5385515000000001 | -1.0683199999999999     |
| H | -0.16891750E+01      | 0.26824216E+00      | -0.11420388E-01          | O | 0.83601563000000001  | -4.6643207999999996 | 5.9211030999999998      |
| H | -0.35567478E-01      | -0.13416916E+01     | -0.60092070E+00          | H | 1.5512077000000000   | -5.2858720999999997 | 6.1394346000000004      |
| H | -0.62999771E+00      | -0.19523653E+01     | 0.19544041E+01           | H | 1.0526895000000001   | -4.4757321000000001 | 5.0171554000000000      |
| O | 1.8066295999999999   | -6.2736027999999999 | 1.3444217000000001       | O | 0.24340637000000001  | -3.5281650999999998 | -2.3910233999999999     |
| H | 1.8988109000000000   | -5.5813638000000001 | 2.0464839000000001       | H | 1.0437643999999999   | -3.5895313999999998 | -3.0072464999999999     |
| H | 1.5500809000000000   | -5.7117975999999997 | 0.61301159000000005      | H | 0.61579070999999996  | -3.6784924999999999 | -1.4770231000000000     |
| O | 4.3423448000000002   | -4.3073782999999999 | 1.0950238000000001       | O | -1.2613645000000000  | -2.3452323000000002 | 4.5006561999999999      |
| H | 3.4882594000000000   | -4.2410728999999998 | 0.59511716000000003      | H | -1.3399958000000001  | -3.2828721000000001 | 4.1523360000000000      |
| H | 4.0367711999999996   | -4.4115520000000004 | 2.0019049000000000       | H | -0.34218955000000001 | -2.4681943999999998 | 4.8059710999999998      |
| O | -1.2513112000000000  | -4.7024027000000004 | 3.5149173999999999       | O | 4.0106283999999999   | -7.1528450000000001 | -0.14349344000000000    |
| H | -0.2712332000000001  | -4.5725254000000000 | 3.4149596000000000       | H | 3.1895851999999998   | -7.1388081999999997 | 0.40403855999999999     |
| H | -1.5177080000000001  | -5.4138780999999998 | 2.8613225999999998       | H | 4.6854326000000004   | -7.1909184000000002 | 0.52855189000000002     |
| O | 3.9491567000000001   | -5.2734538000000004 | 3.6990329000000002       | O | 1.1294831000000001   | -8.8675873000000003 | 2.6232020999999999      |
| H | 4.2335862000000004   | -4.4107184000000004 | 4.0591737999999999       | H | 2.1636653000000000   | -8.0456705999999993 | 2.1006019000000000      |
| H | 2.9510141000000001   | -5.0935376000000003 | 3.6284535999999998       | H | 2.0599178000000000   | -9.0826279999999997 | 2.9015624999999998      |
| O | -1.1155082000000001  | -5.3221993000000003 | -0.22012517000000001     | O | 4.4978892000000004   | -2.9617192000000001 | 5.1520143999999997      |
| H | -0.4657294799999997  | -4.7072735999999997 | 1.9077255000000001E-002  | H | 3.5304278999999998   | -2.6898875000000002 | 4.9679975000000001      |
| O | -0.9887708600000003  | -5.9606029999999999 | 0.4314525799999997       | H | 4.6091534999999997   | -2.3930072000000000 | 5.9340865000000003      |
| O | 3.3204658999999999   | -3.1067616999999999 | -1.6666673999999999      | C | 0.16237398E+01       | -0.33006049E+01     | 0.26766736E+01          |
| H | 2.6196690999999999   | -3.3268377000000000 | -1.1168388000000000      | C | 0.16454705E+01       | -0.20419993E+01     | 0.33947132E+01          |
| H | 3.8645122000000001   | -2.5618162000000000 | -1.0247440000000001      | O | 0.14830272E+01       | -0.10293796E+01     | 0.24609800E+01          |
| O | 0.61045316000000005  | -3.3948121000000002 | -2.3203792999999999      | C | 0.14433203E+01       | -0.15438866E+01     | 0.11219185E+01          |
| H | 1.1953503000000001   | -4.0303098999999998 | -2.6937671000000001      | C | 0.14291739E+01       | -0.30199922E+01     | 0.13180370E+01          |
| H | 0.81164683000000004  | -3.3781287000000000 | -1.3895995000000001      | O | 0.17359514E+01       | -0.17550762E+01     | 0.45999325E+01          |
| O | 0.1060536000000000   | -4.5915134000000002 | 6.1407286000000001       | C | 0.13929682E+00       | -0.10221689E+01     | 0.38845020E+00          |
| H | 1.7199629999999999   | -5.0369549999999998 | 6.5606115999999997       | O | -0.10300576E+01      | -0.16661406E+01     | 0.82691377E+00          |
| H | 1.3994065000000000   | -4.3569060000000000 | 5.2833107999999998       | O | 1.4616564999999999   | -3.9414278999999999 | 0.36291373999999998     |
| O | 3.9712790999999998   | -7.4399091999999997 | -6.3492148999999998E-002 | O | 1.6108350000000000   | -4.5492977999999997 | 3.2227079000000001      |
| H | 3.3131816000000001   | -6.7457308999999999 | 0.16221416999999999      | C | 0.60902709E+01       | 0.53090265E+00      | 0.45505446E+00          |
| H | 4.6782918000000002   | -7.3278886999999999 | 0.53822824999999996      | O | -0.10665979E+01      | 0.99827212E+00      | -0.28443739E+00         |
| O | 1.1835975000000001   | -8.4955665000000007 | 2.8152970000000002       | O | 0.23830740E+01       | -0.11538286E+01     | 0.66162760E+01          |
| H | 1.5189847000000001   | -7.8477931999999999 | 2.2694879999999999       | H | 0.41458392E+01       | 0.97307754E+00      | 0.14970999E+01          |
| H | 1.6234313000000000   | -9.2987864999999997 | 2.5732189000000001       | H | 0.93910025E+00       | 0.89510992E+00      | 0.14495994E-01          |
| O | -1.2868539999999999  | -2.1746089000000000 | 4.7313359000000004       | H | -0.17422873E+01      | 0.31251792E+00      | -0.10653465E+00         |
| H | -1.5379668000000000  | -3.0344057000000002 | 4.2092698999999998       | H | 0.26770419E+00       | -0.12606874E+01     | -0.66428330E+00         |
| H | -1.1506787999999999  | -2.5935600000000001 | 5.6057736000000000       | H | -0.98097005E+00      | -0.16209336E+01     | 0.18447515E+01          |
| O | 4.7275860999999999   | -2.9570061000000001 | 5.3214967000000000       | O | 1.8410010999999999   | -6.8027417999999997 | 1.6187465000000001      |
| H | 3.8283393999999999   | -2.7221069999999998 | 5.0247985000000002       | H | 1.7714204000000000   | -6.0034023000000003 | 2.2056936000000000      |
| H | 4.6981466999999997   | -2.4868138000000002 | 6.1469579000000003       | H | 1.7122801999999999   | -6.2792003999999997 | 0.80817744800000003     |
| C | 0.16308611E+01       | -0.32315515E+01     | 0.26305411E+01           | O | -1.1020559000000001  | -4.8199757999999999 | 3.3566368000000000      |
| C | 0.17960257E+01       | -0.20255364E+01     | 0.33343628E+01           | H | -0.12555023000000001 | -4.8903695000000003 | 3.2266477999999998      |
| O | 0.16670772E+01       | -0.92998803E+00     | 0.24725737E+01           | H | -1.5066698000000001  | -5.6613373999999999 | 2.9510974000000001      |
| C | 0.15676646E+01       | -0.14282576E+01     | 0.10525418E+01           | O | 4.0542845999999999   | -5.0795868999999998 | 3.9333545999999999      |
| C | 0.14534264E+01       | -0.29619065E+01     | 0.12435767E+01           | H | 4.1957284000000001   | -4.0887320999999996 | 4.1547067000000002      |
| O | 0.20742300E+01       | -0.17955948E+01     | 0.44851933E+01           | H | 3.0675881000000000   | -4.9795606000000001 | 3.6193667999999999      |
| C | 0.32801033E+00       | -0.91096675E+00     | 0.35485824E+00           | O | 4.6633509900000002   | -4.3087567000000000 | 1.2252955000000001      |
| O | -0.93488414E+00      | -0.13651481E+01     | 0.94876585E+00           | H | 4.1853892999999998   | -3.4505699999999999 | 1.0455274999999999      |
| O | 1.1335694000000001   | -3.7083922000000000 | 0.22306296000000000      | H | 4.0351138999999998   | -4.7479838000000001 | 1.8391204000000001      |
| O | 1.5742506999999999   | -4.3947960999999998 | 3.3250552000000000       | O | -1.0510971000000000  | -5.4017043999999999 | 1.2520028000000001E-002 |
| C | 0.22408536E+00       | 0.58831630E+00      | 0.27834744E+00           | H | -0.4306954399999998  | -4.6879626999999999 | 0.12124169000000000     |
| O | -0.90520973E+00      | 0.90833659E+00      | -0.54271857E+00          | H | -0.98043166000000004 | -5.9517572000000003 | 0.8268429999999998      |
| H | 0.24462389E+01       | -0.11065438E+01     | 0.52540850E+00           | O | 0.87415416000000001  | -4.6250201000000004 | 5.7232832000000000      |
| H | 0.84940414E-01       | 0.95605193E+00      | 0.13476738E+01           | H | 1.5875117999999999   | -5.2741483999999996 | 5.8664711000000000      |
| H | 0.11063059E+01       | 0.10292185E+01      | -0.14864557E+00          | H | 1.1056097000000000   | -4.2543473000000001 | 4.8280802999999999      |
| H | -0.17108122E+01      | 0.36742120E+00      | -0.50041943E+00          | O | 3.1442792000000002   | -3.2081262000000001 | -1.6907279000000000     |
| H | 0.41628471E+00       | -0.13397429E+01     | -0.62366326E+00          | H | 2.5884553000000001   | -3.6217090000000001 | -1.0240149999999999     |
| H | -0.68794503E+00      | -0.22740473E+01     | 0.11767050E+01           | H | 3.7716224000000000   | -2.7924834000000001 | -1.1056185999999999     |
| O | 1.7886711000000000   | -6.3413582000000002 | 1.3790243000000000       | O | 0.16835241000000001  | -3.6678970999999998 | -2.2685564999999999     |
| H | 1.6726006000000000   | -5.6199203000000004 | 2.0276926000000000       | H | 0.79834437999999996  | -3.4859844999999998 | -2.9782454000000000     |
| H | 1.5732375999999999   | -5.7514099999999999 | 0.67347036000000005      | H | 0.59929140999999997  | -3.6132970000000002 | -1.4296835999999999     |
| O | -1.1693469000000001  | -4.8980101999999999 | 3.3491181000000001       | O | -1.2813775000000001  | -2.2942743000000001 | 4.2727127999999999      |
| H | -0.19575917000000001 | -4.9492598000000001 | 3.3506738999999999       | H | -1.4671010000000000  | -3.2116400000000001 | 3.9400053000000002      |
| H | -1.3575226000000000  | -5.6818989000000002 | 2.8120539000000000       | H | -0.55617404999999998 | -2.5114269000000000 | 4.8833647999999998      |
| O | -1.4098404000000000  | -5.2972479000000003 | 0.21445987000000000      | O | 5.1523800000000000   | -6.9791730000000003 | 2.1680044000000001      |
| H | -0.5130882100000004  | -4.9379052999999997 | 0.49569453000000002      | H | 4.7441114000000004   | -6.2575476999999999 | 2.7015047999999999      |

|   |                          |                     |                          |   |                      |                     |                          |
|---|--------------------------|---------------------|--------------------------|---|----------------------|---------------------|--------------------------|
| H | 6.0783263999999999       | -6.8101767999999998 | 2.3439266999999999       | H | -0.40917389E-01      | 0.88878004E+00      | 0.12013910E+01           |
| O | 3.9581567999999998       | -7.6526281999999997 | -0.11863272000000000     | H | 0.97685740E+00       | 0.79921219E+00      | -0.26404858E+00          |
| H | 3.1943823999999998       | -7.6474101000000001 | 0.49697817000000000      | H | -0.18166025E+01      | 0.51431229E+00      | -0.26500110E+00          |
| H | 4.5551430999999996       | -7.1366658999999997 | 0.47600448000000001      | H | 0.39060881E-01       | -0.15801285E+01     | -0.62570212E+00          |
| O | 1.0185880000000001       | -9.3080423000000003 | 2.3928866000000002       | H | -0.80004832E+00      | -0.16108281E+01     | 0.20252826E+01           |
| H | 0.98945872000000001      | -8.4077075000000008 | 2.0977356000000000       | O | 1.4235509000000000   | -6.4686934999999997 | 1.4397403000000000       |
| H | 1.9400124000000001       | -9.2328004000000004 | 2.6999871999999998       | H | 1.4187592000000000   | -5.6620245999999996 | 2.0410669000000001       |
| C | 0.15346113E+01           | -0.32792958E+01     | 0.26500966E+01           | H | 1.3392461000000000   | -5.9690325000000000 | 0.57937110999999997      |
| C | 0.17250216E+01           | -0.19960666E+01     | 0.32565327E+01           | O | -1.3590620000000000  | -4.3129087000000004 | 3.4121589000000001       |
| O | 0.17405960E+01           | -0.94065595E+00     | 0.23437680E+01           | H | -0.38500566000000003 | -4.4362522000000002 | 3.1719767000000001       |
| C | 0.14988705E+01           | -0.15010803E+01     | 0.10335426E+01           | H | -1.8484037000000000  | -5.0078344000000001 | 2.9578508999999999       |
| C | 0.14855237E+01           | -0.30690815E+01     | 0.12659661E+01           | O | -1.2617668000000000  | -5.5454473000000002 | -7.7233359000000003E-003 |
| O | 0.18762447E+01           | -0.18029806E+01     | 0.45283915E+01           | H | -0.49801725000000002 | -5.0680243000000003 | 0.30278575000000002      |
| C | 0.24428562E+00           | -0.93037853E+00     | 0.40774986E+00           | H | -1.5009269000000001  | -6.0705532000000000 | 0.76319340000000002      |
| O | -0.95493177E+00          | -0.13842759E+01     | 0.99844098E+00           | O | 4.3692447999999997   | -3.8149460999999998 | 1.5806229999999999       |
| O | 1.3920626000000000       | -3.9178757000000002 | 0.33666394999999999      | H | 3.5874012999999998   | -3.2561368000000002 | 1.7173258000000000       |
| O | 1.5557599999999999       | -4.4350567999999999 | 3.3293680000000001       | H | 4.4661014999999997   | -4.0674450000000002 | 2.4489778000000002       |
| C | 0.16458325E+00           | 0.58063612E+00      | 0.27044432E+00           | O | 3.8389136000000001   | -5.5315335000000001 | 3.9348603999999998       |
| O | -0.84139220E+00          | 0.92561648E+00      | -0.67574801E+00          | H | 3.9456321999999999   | -4.6255530000000003 | 4.3344519999999999       |
| H | 0.24225536E+01           | -0.11875622E+01     | 0.48996413E+00           | H | 2.8752621000000000   | -5.4608827000000000 | 3.7437749000000000       |
| H | -0.92759949E-01          | 0.10190393E+01      | 0.12751946E+01           | O | 0.33457658000000001  | -3.7633633000000000 | -2.3236287000000000      |
| H | 0.10870328E+01           | 0.94335933E+00      | -0.17137510E+00          | H | 1.0875992999999999   | -4.2931695999999997 | -2.6353194000000002      |
| H | -0.16088078E+01          | 0.43061928E+00      | -0.42050082E+00          | H | 0.61679908000000006  | -3.6613929000000001 | -1.3372322000000001      |
| H | 0.25610823E+00           | -0.12391349E+01     | -0.66399276E+00          | O | 3.1475770999999999   | -3.2350284000000000 | -1.7869653999999999      |
| H | -0.10904077E+01          | -0.14412189E+01     | 0.19723499E+01           | H | 2.5586777000000001   | -3.5404370000000000 | -1.0871526000000000      |
| O | 2.0184209000000002       | -6.4859539000000002 | 1.4645833000000000       | H | 3.6640834999999998   | -2.5432849000000002 | -1.2219933000000001      |
| H | 1.9407182000000001       | -6.0455538000000004 | 2.3833017000000001       | O | 1.0064932000000000   | -4.5798505000000000 | 5.9234415000000000       |
| H | 1.6686040000000000       | -5.6454428999999996 | 1.0160746000000000       | H | 1.5833355000000000   | -5.2951464000000001 | 6.1250818000000002       |
| O | 4.4046618000000004       | -4.2655241999999998 | 1.3400911000000000       | H | 1.0672572000000000   | -4.4413071000000004 | 4.9238346999999996       |
| H | 3.5784136000000000       | -3.7217387000000000 | 1.3502683000000000       | O | 3.5145420999999999   | -7.4287789999999996 | -0.25861339000000000     |
| H | 4.2087256000000002       | -4.9017679000000003 | 2.1127487000000000       | H | 2.7660971999999999   | -7.0445365000000004 | 0.29249681999999999      |
| O | -1.2587481000000000      | -4.6302561000000004 | 3.4697441000000002       | H | 4.1895724000000003   | -7.4084231000000003 | 0.48558594999999999      |
| H | -0.29469740999999999     | -4.4976608999999996 | 3.3549722000000002       | O | -1.1731946000000000  | -1.8783034000000001 | 4.6022556000000003       |
| H | -1.4024850000000000      | -5.4204977999999997 | 2.9168213999999999       | H | -1.3452687000000001  | -2.7996425999999999 | 4.2427494000000001       |
| O | -1.2044637000000000      | -5.3896072999999998 | -3.1755282000000003E-002 | H | -0.23342935000000001 | -1.9657309000000001 | 4.9775479999999996       |
| H | -0.44562302999999998     | -4.7997731000000003 | 0.22130326000000000      | O | 1.0388397000000000   | -9.0340624999999992 | 2.7049669000000001       |
| H | -1.2957074000000000      | -5.9426121000000002 | 0.75408452000000004      | H | 1.1015995999999999   | -8.1714921000000000 | 2.2638780999999999       |
| O | 4.0270564999999996       | -5.1271481000000003 | 3.9144386999999998       | H | 1.9664271000000000   | -9.2578227999999996 | 2.7848445000000002       |
| H | 4.3864067000000002       | -4.4051549999999997 | 4.4480124999999999       | O | 0.13593568000000000  | -7.1159299999999996 | -1.9223786000000000      |
| H | 3.0581999000000000       | -4.8511151400000000 | 3.8509446000000001       | H | -0.30078611999999999 | -6.6621858999999999 | -1.1467870000000000      |
| O | 0.37080503999999997      | -3.5782761000000001 | -2.0756942999999999      | H | 0.62303145000000004  | -6.3677124999999997 | -2.3417132999999999      |
| H | 1.2099154000000001       | -3.4059621000000000 | -2.5482285999999998      | C | 0.14448477E+01       | -0.31846865E+01     | 0.25827372E+01           |
| H | 0.81662555000000003      | -3.7994669999999999 | -1.2147882999999999      | O | 0.16651311E+01       | -0.19634750E+01     | 0.33100503E+01           |
| O | 3.2655864000000001       | -3.3758077000000002 | -1.7584591000000001      | C | 0.16611525E+01       | -0.86245173E+00     | 0.24169297E+01           |
| H | 2.7024306999999999       | -3.8348412999999999 | -1.1120574000000000      | C | 0.15192537E+01       | -0.14490427E+01     | 0.10924548E+01           |
| H | 3.8819599000000000       | -8.152634999999999  | -1.2080911000000001      | C | 0.14304997E+01       | -0.28920115E+01     | 0.12205404E+01           |
| O | 0.93400159999999999      | -4.6227875000000003 | 5.9938152999999996       | O | 0.17180648E+01       | -0.17235498E+01     | 0.45313310E+01           |
| H | 1.8871572999999999       | -4.7338619000000000 | 6.2543145999999998       | C | 0.14550683E+00       | -0.93183107E+00     | 0.41938445E+00           |
| H | 0.97881116999999995      | -4.7648944000000004 | 5.0217219000000002       | O | -0.99133041E+00      | -0.12384489E+01     | 0.12313531E+01           |
| O | 3.9600686000000000       | -7.4047485999999996 | -0.4644013699999998      | O | 1.3007223000000001   | -3.7682093000000001 | 0.24029139999999999      |
| H | 3.4394418999999998       | -7.2631778999999996 | 0.37558480999999999      | O | 1.2689150000000000   | -4.4099484999999996 | 3.1208534999999999       |
| H | 4.8375222000000004       | -7.1487219000000000 | -0.10293861000000000     | C | 0.28795704E+00       | 0.53802970E+00      | 0.71951228E-01           |
| O | 4.3654130999999996       | -2.8941862000000000 | 5.1559714000000003       | O | -0.70881029E+00      | 0.91321674E+00      | -0.81896113E+00          |
| H | 3.4893654999999999       | -2.5676275000000000 | 4.8567057000000000       | H | 0.23192582E+01       | -0.10323943E+01     | 0.44353092E+00           |
| H | 4.4197740000000003       | -2.4596008999999999 | 6.0480457999999997       | H | 0.28164863E+00       | 0.12009453E+01      | 0.10127394E+01           |
| O | -0.94524699999999995     | -2.1168486000000000 | 4.8213005999999998       | H | 0.12171940E+01       | 0.73965970E+00      | -0.49384006E+00          |
| H | -1.1750659999999999      | -3.0337702000000002 | 4.5935259000000004       | H | -0.15619787E+01      | 0.51370725E+00      | -0.56611933E+00          |
| H | -2.0785943000000001E-002 | -2.2572573000000000 | 5.0486389999999997       | H | 0.10033066E+00       | -0.15070215E+01     | -0.51993537E+00          |
| O | 1.1476253999999999       | -9.0602189000000006 | 2.7116134000000001       | H | -0.65439398E+00      | -0.15212027E+01     | 0.21343826E+01           |
| H | 1.1009036999999999       | -8.2960784000000007 | 2.1433819999999999       | O | 1.6607456000000000   | -6.2975545000000004 | 0.95439419000000003      |
| H | 2.0879362000000001       | -9.3307909999999996 | 2.5715387999999999       | H | 1.4884130000000000   | -5.8909095999999996 | 1.8604084999999999       |
| C | 0.15242178E+01           | -0.33482575E+01     | 0.24865492E+01           | H | 1.8156314000000000   | -5.3780763000000000 | 0.57204918000000005      |
| C | 0.17700501E+01           | -0.21189997E+01     | 0.31169397E+01           | O | 4.3192981000000001   | -3.6649720000000001 | 1.5130296999999999       |
| O | 0.16495601E+01           | -0.10005662E+01     | 0.22895477E+01           | H | 3.3487380000000000   | -3.6401417000000000 | 1.1760676999999999       |
| C | 0.14457841E+01           | -0.15099791E+01     | 0.93358124E+00           | H | 4.2578591000000001   | -4.3082149000000003 | 2.2397486000000000       |
| C | 0.12783631E+01           | -0.30391604E+01     | 0.11431537E+01           | O | -1.2007188000000000  | -5.4281718999999997 | -1.1054108000000000E-002 |
| O | 0.18734163E+01           | -0.17962243E+01     | 0.43216516E+01           | H | -0.54724152000000004 | -4.8098194999999997 | 0.27547423999999998      |
| C | 0.13026822E+00           | -0.10989120E+01     | 0.37170658E+00           | H | -1.0633497999999999  | -6.1117016000000000 | 0.66369964000000004      |
| O | -0.99425687E+00          | -0.16209825E+01     | 0.11180891E+01           | O | -1.7590250999999999  | -4.4547596000000000 | 3.2855935999999999       |
| O | 0.99475796000000005      | -3.8574906000000002 | 0.24617207999999999      | H | -0.75254966999999995 | -4.6096985999999998 | 3.4056413000000001       |
| O | 1.3573656999999999       | -4.5017575000000001 | 3.1212042000000002       | H | -2.0313156999999999  | -5.1929220000000003 | 2.6503665000000001       |
| C | 0.76386873E-01           | 0.43824180E+00      | 0.17872733E+00           | O | 3.7613219999999998   | -5.1303557000000000 | 4.1663573999999999       |
| O | -0.10033300E+01          | 0.85757242E+00      | -0.70940715E+00          | H | 3.9108049000000000   | -4.3466873000000004 | 4.6916069000000000       |
| H | 0.23519088E+01           | -0.12181577E+01     | 0.30380799E+00           | H | 2.7952658000000001   | -5.1051674000000000 | 3.9567394000000000       |
|   |                          |                     |                          | O | 3.2054923000000000   | -3.3459656999999998 | -1.8162313000000001      |

|   |                         |                     |                          |   |                      |                     |                          |
|---|-------------------------|---------------------|--------------------------|---|----------------------|---------------------|--------------------------|
| H | 2.5488268999999999      | -3.4334783000000000 | -1.0828481000000001      | C | 0.14146099E+01       | -0.34071596E+01     | 0.26390927E+01           |
| H | 3.7575126999999999      | -2.6559930000000000 | -1.3614236000000000      | C | 0.16790736E+01       | -0.21903960E+01     | 0.32973441E+01           |
| O | -0.1227038900000000     | -3.8107147000000001 | -2.2449360000000000      | O | 0.18591705E+01       | -0.11484020E+01     | 0.23712010E+01           |
| H | 0.6737450000000004      | -4.1104361999999997 | -2.6122163999999999      | C | 0.15451510E+01       | -0.16576957E+01     | 0.10304130E+01           |
| H | 0.1451828199999999      | -3.6501598999999998 | -1.3060060000000000      | C | 0.14325951E+01       | -0.32010648E+01     | 0.12297545E+01           |
| O | 1.0660470000000000      | -4.6314750000000000 | 5.9584118000000004       | O | 0.19647488E+01       | -0.19754924E+01     | 0.45062777E+01           |
| H | 1.6149610000000001      | -5.4192229999999999 | 6.1535076000000002       | C | 0.35773707E+00       | -0.94869610E+00     | 0.40705125E+00           |
| H | 1.2489459999999999      | -4.4256469999999997 | 5.0010881999999999       | O | -0.85231984E+00      | -0.11974701E+01     | 0.12210833E+01           |
| O | 3.5015196000000000      | -7.6380609000000002 | -0.2846770399999999      | O | 1.2887092000000000   | -4.0941669000000003 | 0.3068214100000000       |
| H | 2.6918749000000002      | -7.1327106999999996 | 3.7080180999999997E-002  | O | 1.3276876000000000   | -4.5937036000000004 | 3.2390983000000002       |
| H | 4.0339184000000001      | -7.4117753000000004 | 0.45573814000000001      | C | 0.49429049E+00       | 0.59237660E+00      | 0.21948239E+00           |
| O | -3.3034330999999999     | -2.9804971999999998 | 0.8033625000000001       | O | -0.59273321E+00      | 0.10771503E+01      | -0.61125943E+00          |
| H | -3.3082460999999999     | -2.9393394000000002 | -0.1844356299999999      | H | 0.24279097E+01       | -0.14305856E+01     | 0.37228102E+00           |
| H | -2.3968756999999998     | -2.6440907000000000 | 1.0405009000000001       | H | 0.41429002E+00       | 0.11190985E+01      | 0.11224470E+01           |
| O | 1.0822887999999999      | -8.7159355000000005 | 3.1855232000000000       | H | 0.14400254E+01       | 0.89094313E+00      | -0.22647495E+00          |
| H | 0.9463846799999998      | -8.0973641999999995 | 2.4596507999999999       | H | -0.13938184E+01      | 0.10135844E+01      | -0.10203007E+00          |
| H | 2.2125611999999999      | -8.8314872999999992 | 3.2876596000000000       | H | 0.21191596E+00       | -0.13559838E+01     | -0.60055048E+00          |
| O | -1.3052589000000001     | -2.0940249999999998 | 4.5192794000000003       | H | -0.61357923E+00      | -0.17720572E+01     | 0.19216871E+01           |
| H | -1.8513991000000001     | -2.8012288000000001 | 4.1004752000000000       | O | 1.2303785000000000   | -6.5802024000000001 | 1.2915934000000000       |
| H | -0.9837495000000005     | -2.5486130000000000 | 5.3103677999999999       | H | 1.1137123000000000   | -6.1025288000000000 | 2.1419074000000000       |
| C | 0.13260192E+01          | -0.34153959E+01     | 0.26991770E+01           | H | 1.4309426000000001   | -5.7061818999999998 | 0.9094789399999996       |
| C | 0.17466525E+01          | -0.21514813E+01     | 0.33473631E+01           | O | -1.4458225000000000  | -4.8156768000000003 | 3.5184513000000002       |
| O | 0.16821593E+01          | -0.11319245E+01     | 0.24064307E+01           | H | -0.51000798000000003 | -4.7738725000000004 | 3.2516213000000000       |
| C | 0.15193873E+01          | -0.1638957E+01      | 0.11144455E+01           | H | -1.8454904999999999  | -5.4583354000000002 | 2.8204889000000000       |
| C | 0.13550417E+01          | -0.31364821E+01     | 0.13314529E+01           | O | -1.2070916000000000  | -5.5237625000000001 | -0.1869202200000000      |
| O | 0.21042992E+01          | -0.18761121E+01     | 0.44877674E+01           | H | -0.42470407999999998 | -5.0227976999999999 | 0.1145309999999999       |
| C | 0.25917748E+00          | -0.10144338E+01     | 0.45449235E+00           | H | -0.5705727000000001  | -6.0844136999999998 | 0.5791222099999997       |
| O | -0.90175594E+00         | -0.11290706E+01     | 0.12907069E+01           | O | 3.8848052000000002   | -5.2166952000000002 | 3.7112017000000002       |
| O | 1.2237644999999999      | -3.9191698000000001 | 0.31046918000000001      | H | 4.0829908000000001   | -4.3581070999999998 | 4.1895699999999998       |
| O | 1.2873915000000000      | -4.6265761999999997 | 3.2614212999999999       | H | 2.8888321000000001   | -5.1293803999999996 | 3.6958457000000000       |
| C | 0.39587173E+00          | 0.46327217E+00      | 0.16694140E+00           | O | 4.6701762000000002   | -3.9792293000000001 | 1.2944363999999999       |
| O | -0.63591422E+00         | 0.10416628E+01      | -0.61901060E+00          | H | 4.1741406999999997   | -4.2514963000000003 | 2.0876209000000001       |
| H | 0.24643563E+01          | -0.14542219E+01     | 0.56619322E+00           | H | 4.1249804000000001   | -3.2033323999999999 | 1.1009028000000001       |
| H | 0.45478040E+00          | 0.10033288E+01      | 0.11104543E+01           | O | 9.2297342999999998   | -2.8707365999999999 | -1.7237107000000000      |
| H | 0.13320397E+01          | 0.64533090E+00      | -0.43229467E+01          | H | 2.4655118899999998   | -3.4910814999999999 | -1.1139827000000000      |
| H | -0.14857636E+01         | 0.63762804E+00      | -0.40172708E+00          | H | 3.6879637999999999   | -2.6273898000000000 | -1.1287020000000000      |
| H | 0.11491458E+00          | -0.16481136E+01     | -0.41536013E+00          | O | 1.0228105000000001   | -4.7214393000000001 | 5.9264608000000001       |
| H | -0.57202164E+00         | -0.90453149E+00     | 0.21453185E+01           | H | 1.7076990000000001   | -5.3588221000000003 | 6.0804425999999996       |
| O | 1.5362213000000000      | -6.4153342999999996 | 1.1607422000000001       | H | 1.0520389999999999   | -4.5751822000000004 | 4.9887287000000002       |
| H | 1.3511229000000000      | -5.9821477999999999 | 2.0402211000000001       | O | 0.20100978000000000  | -3.6430418000000002 | -2.1787635000000001      |
| O | 1.7778702000000000      | -5.5917092000000004 | 0.67775836000000000      | H | 0.81463821999999997  | -4.2987523099999996 | 2.4707219000000000       |
| H | -1.2471018000000000     | -5.2730091999999997 | 9.2183888000000005E-002  | O | 0.39107121000000000  | -3.6371812000000001 | -1.2562472000000000      |
| H | -0.38823291999999998    | -4.9197218999999999 | 0.42521563000000001      | O | 3.2612165000000002   | -7.4359802999999998 | -0.3561155500000000      |
| H | -1.5080507000000001     | -5.8152473000000002 | 0.8725755499999998       | H | 2.3414126999999998   | -7.4492858000000002 | -1.2477401000000001E-002 |
| H | 4.5686568000000003      | -3.8717304000000001 | 1.3746271000000001       | H | 3.7730448999999999   | -7.1199165000000004 | 0.3619515400000002       |
| H | 4.6272824999999997      | -3.1183971000000001 | 2.0077056999999998       | O | 1.1576417000000001   | -8.8601030999999999 | 3.2281487000000002       |
| H | 3.7466140999999999      | -4.1634509000000000 | 1.7554828000000000       | H | 1.1609721000000000   | -8.0132282999999997 | 2.6837023000000002       |
| O | 3.7758194999999999      | -5.0239744000000002 | 3.9032822000000000       | H | 1.9410741000000000   | -9.3148458999999999 | 2.8525684000000000       |
| H | 3.8646368999999998      | -4.1422891000000002 | 4.3608468000000000       | O | 4.6019268000000002   | -7.1784140000000001 | 2.0620235000000000       |
| H | 2.7983254999999998      | -4.9637840000000004 | 3.6299739999999998       | H | 4.4906796000000000   | -6.2843619999999998 | 2.4316518999999999       |
| O | -1.6804338999999999     | -4.5973750999999998 | 3.5678448000000000       | H | 5.5884480999999999   | -7.1366759000000002 | 1.8405130000000001       |
| H | -0.73064395000000004    | -4.6657057999999996 | 3.4472599000000002       | O | -1.3023845000000001  | -2.1964901000000001 | 4.5282283000000003       |
| H | -1.8947927000000000     | -5.3299269999999996 | 2.9089285999999999       | H | -1.8256186000000001  | -2.9872429999999999 | 4.2339054000000003       |
| O | 2.9598599999999999      | -3.0706381999999999 | -1.6764996000000001      | H | -0.7156027999999998  | -2.6203379000000000 | 5.2310127000000000       |
| H | 2.3902166999999999      | -3.2826914999999999 | -0.90007607000000001     | C | 0.15107713E+01       | -0.33491638E+01     | 0.27139394E+01           |
| H | 3.7851431999999998      | -2.9092498999999998 | -1.1724926000000000      | C | 0.17610736E+01       | -0.20531694E+01     | 0.32342887E+01           |
| O | 0.81625117999999997     | -4.5601437000000002 | 5.0067320000000003       | O | 0.18689340E+01       | -0.10618562E+01     | 0.23372738E+01           |
| H | 1.4062593999999999      | -5.2608109000000001 | 6.0842492000000004       | C | 0.15613790E+01       | -0.16884598E+01     | 0.10047942E+01           |
| H | 1.1824625000000000      | -4.4511096999999999 | 4.8869674999999999       | C | 0.15165973E+01       | -0.32000799E+01     | 0.13376109E+01           |
| O | 4.7992545999999997E-002 | -3.9334223000000001 | -2.3305946000000000      | O | 0.19183672E+01       | -0.17117382E+01     | 0.44686841E+01           |
| H | 0.92296458000000003     | -4.0298527000000002 | -2.7847251000000002      | C | 0.26814784E+00       | -0.1024815E+01      | 0.42183047E+00           |
| H | 0.40161300000000000     | -3.9243082000000000 | -1.3950427999999999      | O | -0.92986213E+00      | -0.12255276E+01     | 0.12823213E+01           |
| O | 4.5579986000000003      | -7.0971415000000002 | 1.9415929999999999       | O | 1.5552931000000001   | -4.1002691999999996 | 0.4075810500000000       |
| H | 4.1486501000000002      | -6.3104449999999996 | 2.3812628999999998       | O | 1.3287051000000001   | -4.5314629000000002 | 3.3870854000000001       |
| H | 5.5058465999999999      | -6.8461828999999996 | 1.8622889000000000       | C | 0.49399444E+00       | 0.45470527E+00      | 0.31865045E+00           |
| O | 1.3202479000000000      | -8.3489336000000005 | 3.3100377000000001       | O | -0.35813549E+00      | 0.11729370E+01      | -0.52935337E+00          |
| H | 1.5139841999999999      | -7.7767605000000000 | 2.5645308000000000       | H | 0.23623535E+01       | -0.13913683E+01     | 0.26873045E+00           |
| H | 2.1885351000000002      | -8.7660850999999997 | 3.4883346999999998       | H | 0.46447220E+00       | 0.88186440E+00      | 0.13302932E+01           |
| O | 3.5067233999999998      | -7.7329309999999998 | -0.38597152000000001     | H | 0.14894145E+01       | 0.5460779E+00       | -0.13787054E+00          |
| H | 2.6518994000000000      | -7.3577624000000004 | -1.9577424000000000E-002 | H | -0.12179654E+01      | 0.75326254E+00      | -0.37386812E+00          |
| H | 4.0795750999999996      | -7.4692765999999997 | 0.35761124000000000      | H | 0.17987829E+00       | -0.14898691E+01     | -0.53126090E+00          |
| O | -1.1455914000000000     | -1.8945495000000001 | 4.8101279000000003       | H | -0.73577737E+00      | -0.14633063E+01     | 0.22036432E+01           |
| H | -1.2763732000000001     | -2.8282289000000000 | 4.5941796999999998       | O | 1.3197357000000001   | -6.5794772999999998 | 1.8202691000000000       |
| H | -0.9326424899999999     | -1.9235903999999999 | 5.7471524000000000       | H | 1.2316638000000000   | -5.7787082999999999 | 2.4146789000000002       |
|   |                         |                     |                          | H | 1.0948891999999999   | -6.0947658999999996 | 1.0028459000000001       |

|   |                         |                     |                     |   |                         |                     |                     |
|---|-------------------------|---------------------|---------------------|---|-------------------------|---------------------|---------------------|
| O | 4.6578669000000001      | -4.3729880999999997 | 1.3960136999999999  | O | -1.6014725000000001     | -1.9898705000000001 | 4.5347299999999997  |
| H | 4.6627080999999997      | -4.7253515000000004 | 2.3032430000000002  | H | -1.1600189000000001     | -2.8921481999999998 | 4.3688986999999999  |
| H | 3.7212524000000000      | -4.3886573999999996 | 1.1831670999999999  | H | -1.4530478000000000     | -1.9780924000000000 | 5.4793816000000000  |
| O | 3.7165564999999998      | -5.3573126999999996 | 4.0799572000000000  | O | 3.4530183999999999      | -7.7354722999999996 | 0.1498120100000000  |
| H | 3.7743916000000000      | -4.4652399999999997 | 4.3852614000000001  | H | 2.5958689000000001      | -7.5189269000000003 | 0.6214963900000001  |
| H | 2.8001296999999998      | -5.2387641000000000 | 3.8333267000000002  | H | 4.1280137999999997      | -7.3175093999999996 | 0.7772536700000001  |
| O | -1.4086183000000001     | -5.4951943999999999 | 0.4147863199999999  | O | 1.1839386000000001      | -8.7410069000000004 | 3.4247817999999999  |
| H | -0.8053706299999998     | -4.8940020999999998 | 0.8345906800000003  | H | 1.2674547000000000      | -8.1426546000000002 | 2.7119260000000001  |
| H | -1.6554721999999999     | -6.2000804000000000 | 1.1196254999999999  | H | 2.0542329000000001      | -9.1068633000000005 | 3.3475465000000000  |
| O | -1.4761120799999999     | -4.6761869999999996 | 3.7603049000000000  | O | 5.0603612000000000      | -7.1775308999999996 | 2.1726394000000000  |
| H | -0.4899016800000000     | -4.7722918999999999 | 3.6966733000000001  | H | 4.8505580000000004      | -6.5350057000000001 | 2.8751655999999999  |
| H | -1.7878076000000001     | -5.3978361000000001 | 3.2508181000000000  | H | 6.0205817000000001      | -6.9396374999999999 | 2.1071925999999999  |
| O | 3.1758875000000000      | -2.9516339999999999 | -1.6079583000000000 |   |                         |                     |                     |
| H | 2.6824102000000001      | -3.3525795000000000 | -0.8600016400000001 | C | 0.14637178E+01          | -0.33108193E+01     | 0.27032038E+01      |
| H | 3.9114719000000000      | -2.4631093000000002 | -1.1815245000000001 | C | 0.16130472E+01          | -0.20641054E+01     | 0.34687659E+01      |
| O | 1.5858863000000001      | -4.4648893999999997 | 6.1039608000000003  | O | 0.16355267E+01          | -0.99049409E+01     | 0.26250927E+01      |
| H | 1.9944748999999999      | -5.3225620999999999 | 6.1872818000000001  | C | 0.15931201E+01          | -0.14291550E+01     | 0.12074299E+01      |
| H | 1.5083260999999999      | -4.3471156000000000 | 5.1250821999999996  | C | 0.15480209E+01          | -0.30005933E+01     | 0.13641240E+01      |
| O | 0.2502167000000001      | -3.7369924000000001 | -2.0641259999999999 | O | 0.18318554E+01          | -0.1800914E+01      | 0.46674736E+01      |
| H | 0.9008847800000000      | -4.2964973999999998 | -2.5908419999999999 | C | 0.24502519E+00          | -0.84922783E+00     | 0.69905130E+00      |
| H | 0.7008815000000000      | -3.8269986999999999 | -1.2159424000000001 | O | -0.86455697E+00         | -0.13235903E+01     | 0.14833096E+01      |
| O | 3.4110543000000000      | -7.5973471999999997 | -0.1399152300000000 | O | 1.3195276000000000      | -3.7383712999999998 | 0.2957886800000003  |
| H | 2.7277650000000002      | -7.0728748000000001 | 0.2540358999999998  | O | 1.2994068000000001      | -4.4375602000000001 | 3.4029902999999999  |
| H | 4.6159253999999999      | -7.5746971300000000 | 0.4470508000000003  | C | 0.28795044E+00          | 0.70847587E+00      | 0.61990620E+00      |
| O | 1.1656545000000000      | -8.8759157000000002 | 3.3048008000000002  | O | -0.29609334E+00         | 0.12056875E+01      | -0.55317032E+00     |
| H | 1.0815904999999999      | -8.0555569999999993 | 2.7521469999999999  | H | 0.24576940E+01          | -0.95133889E+00     | 0.67554159E+00      |
| H | 2.0583895999999999      | -8.7807610999999994 | 3.6266421000000002  | H | -0.1942889E+00          | 0.1102364E+01       | 0.15584121E+01      |
| O | 5.0825104000000003      | -7.1802444000000003 | 2.4166156999999999  | H | 0.12781281E+01          | 0.11057969E+01      | 0.48535160E+00      |
| H | 4.6199056000000001      | -6.5449713000000003 | 2.9646865999999998  | H | -0.12622495E+01         | 0.13522239E+01      | -0.34278050E+00     |
| H | 6.0241576999999999      | -6.9530088000000001 | 2.3791186999999998  | H | 0.13415224E+00          | -0.11488256E+01     | -0.33602452E+00     |
| O | -1.5355530000000000     | -1.9164806999999999 | 4.3539288999999997  | H | -0.57013576E+00         | -0.14921455E+01     | 0.23671399E+01      |
| H | -1.7591308000000001     | -2.7986374999999999 | 4.0579023000000003  | O | 1.6065507000000001      | -6.3379317000000004 | 1.6295766000000000  |
| H | -0.88874874000000004    | -2.1593881000000001 | 5.0036493000000002  | H | 1.5218346000000000      | -5.8170118000000004 | 2.5161821999999998  |
| C | 0.15420413E+01          | -0.32992388E+01     | 0.28628421E+01      | H | 1.3559494499999998      | -5.5894944999999998 | 1.0908666000000000  |
| C | 0.18455660E+01          | -0.19385852E+01     | 0.33765991E+01      | O | -1.1131557000000001     | -5.3500882000000001 | 0.1858917200000001  |
| O | 0.165112537E+01         | -0.98413994E+00     | 0.24009563E+01      | H | -0.3893817800000001     | -4.7300377999999998 | 0.4525282700000001  |
| C | 0.14834779E+01          | -0.16652073E+01     | 0.11223807E+01      | H | -1.5896125000000001     | -5.4659725000000003 | 1.0544123000000001  |
| C | 0.14588676E+01          | -0.31520533E+01     | 0.14342599E+01      | O | 4.5204516000000003      | -4.8700711999999999 | 1.0676555999999999  |
| O | 0.20158193E+01          | -0.15200422E+01     | 0.45441532E+01      | H | 4.6683981000000001      | -5.7769475999999997 | 1.4136854999999999  |
| C | 0.23279254E+00          | -0.10368133E+01     | 0.48720270E+00      | O | 3.5855513000000001      | -4.6348085000000001 | 1.1891198000000001  |
| O | -0.10567438E+01         | -0.12919636E+01     | 0.12489658E+01      | H | -1.4441583000000000     | -4.8504896000000004 | 4.0392188000000004  |
| O | 1.3689783000000000      | -4.1031009999999997 | 0.5516138400000002  | H | -0.4633529599999998     | -4.7137859000000004 | 3.8748464999999999  |
| O | 1.5204340999999999      | -4.3909311000000004 | 3.5915070000000000  | H | -1.6634921000000000     | -5.5944118999999999 | 3.4549262999999999  |
| C | 0.37736027E+00          | 0.37736991E+00      | 0.50549342E+00      | O | 3.7726264000000000      | -5.5787778000000001 | 4.3328436000000004  |
| O | -0.66524883E+00         | 0.12516520E+01      | -0.13774253E+00     | H | 3.8305107000000000      | -4.8141194000000000 | 4.8057670000000003  |
| H | 0.23993964E+01          | -0.13601423E+01     | 0.54732017E+00      | H | 2.8363209000000000      | -5.4880165999999999 | 4.0706762000000000  |
| H | 0.49950125E+00          | 0.98879029E+00      | 0.15089717E+01      | O | 3.0064570000000002      | -2.8192865999999999 | -1.6930334000000000 |
| H | 0.12517535E+01          | 0.72904281E+00      | -0.87992330E-01     | H | 2.3519777999999998      | -3.4128071000000002 | -1.2862651000000001 |
| H | -0.15219849E+01         | 0.78870459E+00      | -0.65126087E-01     | H | 3.4728607999999999      | -2.3802743999999998 | -0.9402383699999999 |
| H | 0.50057647E-01          | -0.13610230E+01     | -0.55653975E+00     | O | 0.7883697699999997      | -4.1607429999999996 | 6.2222990999999999  |
| H | -0.71701072E+00         | -0.15137139E+01     | 0.21583624E+01      | H | 1.1064373999999999      | -5.0749338000000002 | 6.4155578000000002  |
| O | 1.7911096000000000      | -6.3912275999999997 | 1.7714951999999999  | H | 0.9997304900000003      | -4.0263061999999996 | 5.2735384999999999  |
| H | 1.7946228000000000      | -5.8749703000000002 | 2.6361530000000002  | O | 3.3270109999999999E-003 | -3.5638431000000002 | -2.3309821999999998 |
| H | 1.6390146000000001      | -5.6321611000000003 | 1.2222184000000000  | H | 0.6156464699999995      | -3.9846135999999999 | -2.9625430000000001 |
| O | 4.4923222999999997      | -4.3995927000000004 | 1.2700864000000001  | H | 0.4185857499999998      | -3.5298824999999998 | -1.4469669999999999 |
| H | 4.1240442000000002      | -5.2355304000000000 | 1.5991166999999999  | O | 3.3938969000000001      | -7.5524282999999999 | 0.1513164200000001  |
| H | 3.6497077999999998      | -3.8865547999999999 | 1.2085352000000000  | H | 2.6324773000000001      | -6.9791284999999998 | 0.4563304000000002  |
| O | 3.9488772999999999      | -5.3910888000000003 | 4.2015997000000000  | H | 3.8552301000000000      | -7.5355146000000000 | 0.9945287699999995  |
| H | 4.1445857999999998      | -4.6514042000000000 | 4.7983924000000000  | O | 0.8745300499999995      | -8.5520134999999993 | 3.3032645000000000  |
| H | 3.0401047999999999      | -5.0346634000000003 | 3.8403228999999999  | H | 1.1249974000000000      | -7.8413874000000003 | 2.6275529999999998  |
| O | -1.3333573000000001     | -4.9949734000000001 | 3.9816962999999999  | H | 1.6540663000000000      | -9.0879680999999994 | 3.1119838000000000  |
| H | -0.4122292000000003     | -4.7707546000000001 | 3.7070853000000001  | O | -0.3235117499999999     | -6.7479078000000001 | -2.1006046000000000 |
| H | -1.4836373000000000     | -5.8834926999999997 | 3.5610184999999999  | H | -0.3257654700000000     | -6.2598267999999999 | -1.2608024000000000 |
| O | -1.0595958000000001     | -5.7658132000000002 | 0.1362742500000001  | H | 0.5534036799999995      | -6.4395465999999999 | -2.4538635000000002 |
| H | -0.35968512000000002    | -4.9896243000000000 | 0.1283571500000000  | O | -1.5729652999999999     | -2.0334143000000000 | 4.5586279000000003  |
| H | -1.1826026999999999     | -5.9427880999999996 | 1.1149973000000000  | H | -1.7270823000000000     | -2.9679617000000000 | 4.4221763000000003  |
| O | 1.1750449000000001      | -4.2674130999999997 | 6.2147753999999997  | H | -1.4875631000000000     | -1.9549437999999999 | 5.5029474000000000  |
| H | 1.6087648999999999      | -5.0459261000000000 | 6.4533186999999996  | C | 0.12544972E+01          | -0.33575950E+01     | 0.27369362E+01      |
| H | 1.4258036000000001      | -4.1335670000000002 | 5.2816938999999996  | C | 0.15682297E+01          | -0.21173269E+01     | 0.34348418E+01      |
| O | 2.9603310000000000      | -3.0928338000000002 | -1.6265571999999999 | O | 0.17257318E+01          | -0.11154225E+01     | 0.25181044E+01      |
| H | 2.5715070999999998      | -3.7027554000000000 | -1.0365160000000000 | C | 0.15793398E+01          | -0.16544654E+01     | 0.11949770E+01      |
| H | 3.6236446000000000      | -2.6513194000000002 | -1.0429169000000000 | C | 0.13822307E+01          | -0.31332158E+01     | 0.13884221E+01      |
| O | 5.7944606000000003E-002 | -3.9045928000000001 | -2.3138431000000002 | O | 0.17918861E+01          | -0.17156856E+01     | 0.45802312E+01      |
| H | 0.77893986000000004     | -4.1719638999999997 | -2.9248360999999998 | C | 0.38190971E+00          | -0.82449629E+00     | 0.57265537E+00      |
| H | 0.49734411000000001     | -3.8820458000000002 | -1.4363272000000000 | O | -0.87830854E+00         | -0.92707839E+00     | 0.12813508E+01      |

|   |                      |                     |                          |   |                          |                     |                      |
|---|----------------------|---------------------|--------------------------|---|--------------------------|---------------------|----------------------|
| O | 1.5160452000000000   | -3.9156894000000002 | 0.3679560599999997       | H | -1.9731112000000000      | -5.7036246999999998 | 3.3376925000000002   |
| O | 1.0100009000000001   | -4.5294800999999998 | 3.3790363000000001       | O | 3.3861987000000000       | -5.3905194999999999 | 4.4216107999999998   |
| C | 0.69618811E+00       | 0.62101239E+00      | 0.55144131E+00           | H | 3.6198359000000000       | -4.6024681000000003 | 4.9488035999999997   |
| O | -0.31076938E+00      | 0.12811291E+01      | -0.35084934E+00          | H | 2.4093545999999999       | -5.2162601000000004 | 4.1953126000000003   |
| H | 0.24791468E+01       | -0.14104013E+01     | 0.67463645E+00           | O | 0.52362635999999996      | -4.5438963000000001 | 5.9555347000000003   |
| H | 0.55441355E+00       | 0.92585104E+00      | 0.16169187E+01           | H | 1.0114563999999999       | -5.3090355000000002 | 6.2507524999999999   |
| H | 0.16827721E+01       | 0.87949752E+00      | -0.19287036E-01          | H | 0.64718885999999998      | -4.9551287000000004 | 4.9551287000000004   |
| H | -0.12611245E+01      | 0.12094771E+01      | -0.63847202E-01          | O | 3.1151502000000000       | -3.0888103000000000 | -1.4904968000000001  |
| H | 0.70814938E-01       | -0.12021285E+01     | -0.42185959E+00          | H | 5.2381863000000000       | -3.6490089999999999 | -0.82133639999999997 |
| H | -0.65050162E+00      | -0.12499952E+01     | 0.22144423E+01           | H | 3.5903214000000001       | -2.9472718399999999 | -0.94727183999999998 |
| O | 1.6412458000000001   | -6.4121883000000004 | 1.4589544999999999       | O | 0.15649996999999999      | -3.5706003000000002 | -2.1889797000000000  |
| H | 1.4734023999999999   | -5.9589970000000001 | 2.3707601000000000       | H | 0.79803290000000005      | -3.9409496000000002 | -2.9000799000000002  |
| H | 1.7463465000000000   | -5.5772868000000004 | 0.9888427499999999       | H | 0.61072978000000000      | -3.7266276999999999 | -1.3557117000000001  |
| O | -1.0884727999999999  | -5.9483870999999997 | 0.4233299899999999       | O | 0.80616326999999999      | -8.7039495999999996 | 2.6519278000000002   |
| H | -0.3682208000000001  | -5.3334415000000002 | 0.64645779000000003      | H | 1.1779826000000000       | -7.9089191999999997 | 2.1840758000000000   |
| H | -1.2895112000000000  | -6.3573779999999998 | 1.3043648000000001       | H | 1.6176037000000001       | -9.1970279999999995 | 2.6270728999999999   |
| O | 4.2021784000000002   | -5.0270054999999996 | 0.99398894000000004      | O | 3.6730060000000000       | -7.6304740999999998 | -0.23272749000000001 |
| H | 3.7033448999999998   | -5.4393162999999998 | 1.6706287000000000       | H | 3.1204326000000000       | -7.0517740000000000 | 0.30329992000000000  |
| H | 3.6352099999999998   | -6.3647479000000002 | 0.65034380000000003      | H | 4.5110912000000001       | -7.6568889000000002 | 0.28396388000000000  |
| O | 3.4282534000000000   | -5.4505416999999996 | 4.4080952000000000       | O | -3.0690632999999998      | -2.9979095000000000 | 0.61401269999999997  |
| H | 3.7021068000000001   | -6.6498993999999998 | 4.9409403999999997       | H | -2.9881063000000001      | -3.2692144999999999 | -0.30701811000000001 |
| H | 2.5857418999999999   | -5.1637556000000000 | 4.1029552000000002       | H | -2.2553262000000000      | -2.5577920000000000 | 0.75477592000000004  |
| O | -1.7740467000000000  | -4.7211622000000002 | 3.9032456999999998       | O | 4.4353638999999996       | -7.5594067000000003 | 2.9501859000000001   |
| H | -0.8295864600000003  | -4.7947126999999998 | 3.6560388000000001       | H | 3.8604134999999999       | -6.9778086999999998 | 3.4980693999999999   |
| H | -2.1042025999999998  | -5.5293444000000003 | 3.5068136999999999       | H | 5.3274863999999997       | -7.0930520000000001 | 3.0076801000000000   |
| O | 0.28073083999999998  | -3.5138639000000000 | -1.9734520000000000      |   |                          |                     |                      |
| H | 0.88469529999999996  | -4.0575159000000003 | -2.5455345999999999      | C | 0.14526639E+01           | -0.34432261E+01     | 0.28498919E+01       |
| H | 0.78028520000000001  | -3.5176677000000001 | -1.1236614000000000      | O | 0.17211146E+01           | -0.21369190E+01     | 0.34723102E+01       |
| O | 3.1165707000000000   | -3.0664551000000002 | -1.5841491000000001      | C | 0.18459034E+01           | -0.11184004E+01     | 0.25814670E+01       |
| H | 2.5237153000000001   | -3.5691532000000001 | -0.93433215000000003     | C | 0.16472122E+01           | -0.16731060E+01     | 0.12462494E+01       |
| H | 3.8402731000000001   | -2.7827373000000000 | -1.0418099000000001      | C | 0.14966897E+01           | -0.32071166E+01     | 0.14770255E+01       |
| O | 0.74484492000000002  | -4.3387688999999998 | 6.1276378999999999       | O | 0.18001810E+01           | -0.18499307E+01     | 0.47397130E+01       |
| H | 1.4156032000000001   | -4.8977314999999999 | 6.4148835999999996       | C | 0.27853206E+00           | -0.10446790E+01     | 0.68626494E+00       |
| H | 0.74642140000000001  | -4.2469086000000003 | 5.1897754000000003       | O | -0.92974993E+00          | -0.13178084E+01     | 0.14068543E+01       |
| O | 3.6371701000000001   | -7.5215886999999997 | -6.2637210999999998E-002 | O | 1.3523434999999999       | -4.0425749000000000 | 0.46229863999999998  |
| H | 2.9835935000000000   | -7.1534738000000004 | 0.61814232000000002      | O | 0.98705366000000005      | -4.5263286000000000 | 3.5238418999999999   |
| H | 4.4176539999999997   | -7.1990015999999999 | 0.33910643000000001      | C | 0.42150581E+00           | 0.45959515E+00      | 0.69145854E+00       |
| O | 0.81043653000000004  | -8.6532932000000002 | 2.8185839000000001       | O | -0.58265792E+00          | 0.11594656E+01      | 0.39458126E-02       |
| H | 0.8155689299999997   | -7.9254334000000002 | 2.2310696999999999       | H | 0.24798222E+01           | -0.14950800E+01     | 0.61990512E+00       |
| H | 1.7585645999999999   | -8.8899260000000009 | 2.7106240000000001       | H | 0.39529729E+00           | 0.78413607E+00      | 0.17970620E+01       |
| O | -1.8718657999999999  | -1.8675246000000000 | 4.2115764999999996       | H | 0.13885539E+01           | 0.81391078E+00      | 0.25223600E+00       |
| H | -1.7716113000000000  | -2.7848570000000001 | 3.8827913999999999       | H | -0.15150324E+01          | 0.10942630E+01      | 0.34122269E+00       |
| H | -2.4248435000000002  | -2.0509746999999998 | 4.9760418000000000       | H | 0.77304031E-01           | -0.14897180E+01     | -0.30816815E+00      |
| O | 4.0070677000000003   | -3.0315175000000001 | 5.5558950000000000       | H | -0.72887957E+00          | -0.18280084E+01     | 0.22399945E+01       |
| H | 3.2045701000000002   | -2.7909730000000001 | 5.0522755000000004       | O | 1.8433898000000000       | -6.4295466000000001 | 1.7964613000000000   |
| H | 4.4289679000000000   | -2.2162266000000002 | 5.8086460000000004       | H | 1.5589977000000001       | -6.0408527999999997 | 2.6509166999999998   |
|   |                      |                     |                          | H | 1.6828689999999999       | -5.6227375000000004 | 1.2420848000000000   |
| C | 0.13434138E+01       | -0.33337572E+01     | 0.27672288E+01           | O | -0.55389306000000005     | -6.2311002000000002 | 0.59187855000000000  |
| C | 0.15982676E+01       | -0.20466316E+01     | 0.33740080E+01           | H | -8.5247277000000000E-002 | -5.4413000000000000 | 0.62317920000000004  |
| O | 0.16813559E+01       | -0.10859654E+01     | 0.23792148E+01           | H | -0.21635531000000000     | -6.7663617000000000 | 1.2918183000000001   |
| C | 0.14998226E+01       | -0.16348386E+01     | 0.11353840E+01           | O | -1.5792922000000000      | -5.0174099999999999 | 3.9158293999999998   |
| C | 0.13243565E+01       | -0.31287635E+01     | 0.13871206E+01           | H | -0.63609572000000003     | -4.8430966000000000 | 3.7592826000000001   |
| O | 0.18287509E+01       | -0.16877204E+01     | 0.45354827E+01           | H | -1.711171771000000000    | -5.9139790000000003 | 3.4162658000000001   |
| C | 0.26668634E+00       | -0.94350167E+00     | 0.54819227E+00           | C | 3.4868952000000002       | -5.2045132000000001 | 4.4947229000000002   |
| O | -0.89258277E+00      | -0.12521199E+01     | 0.13883142E+01           | H | 3.5032383999999999       | -4.4252815999999999 | 5.1174400999999996   |
| O | 1.2340008000000000   | -4.0414234999999996 | 0.44477815999999998      | H | 2.5969050000000000       | -5.1074476999999998 | 4.1562796999999998   |
| O | 1.1026080000000000   | -4.5023758000000003 | 3.4009083000000002       | H | 4.3925770999999996       | -4.8882021000000000 | 1.2544310999999999   |
| C | 0.57554932E+00       | 0.52698811E+00      | 0.36630426E+00           | H | 4.0605362999999999       | -4.0431289000000001 | 1.5256168999999999   |
| O | -0.54711010E+00      | 0.12453417E+01      | -0.22655484E+00          | H | 3.6665288000000000       | -5.4152844000000000 | 1.5181271000000001   |
| H | 0.23344254E+01       | -0.14326358E+01     | 0.45394825E+00           | O | 3.2415033000000002       | -3.5532604999999999 | -1.4575855000000000  |
| H | 0.91687123E+00       | 0.10204660E+01      | 0.12152744E+01           | H | 2.5371725999999999       | -3.8676168000000000 | -0.79909406000000005 |
| H | 0.13825000E+01       | 0.80470922E+00      | -0.29766564E+00          | H | 3.7771096000000002       | -3.0823154000000001 | -0.87046661000000003 |
| H | -0.13828052E+01      | 0.92501141E+00      | 0.17907624E+00           | O | 0.12062535000000001      | -3.5777551000000001 | -1.9786690000000000  |
| H | 0.18978207E-01       | -0.13640371E+01     | -0.44030696E+00          | H | 0.7380311499999997       | -4.1478833000000002 | -2.5762944999999999  |
| H | -0.65439673E+00      | -0.15542456E+01     | 0.22333736E+01           | H | 0.52640816999999995      | -3.7356221000000001 | -1.1278725000000001  |
| O | 1.9784264000000000   | -6.4369478000000004 | 1.7992052999999999       | O | 0.39288222000000000      | -4.4582860000000002 | 6.1337090999999999   |
| H | 1.6346890999999999   | -5.9811978000000003 | 2.6606733000000000       | H | 0.8167891299999997       | -5.3939792000000004 | 6.0292269000000003   |
| H | 1.6381228999999999   | -5.7619080000000000 | 1.1971257000000000       | O | 0.5683307699999999       | -4.1854943000000002 | 5.1820864000000002   |
| O | -0.81940268000000005 | -6.0623791000000002 | 0.53468985000000002      | O | 0.54040845000000004      | -8.5518994999999993 | 2.7033179000000001   |
| H | -0.24086102000000001 | -5.2745489999999996 | 0.53144716999999997      | H | 1.1306920000000000       | -7.7851812999999996 | 2.4854528999999999   |
| H | -1.0548706000000001  | -6.2109781000000002 | 1.4495822000000000       | H | 1.1164398000000000       | -9.0929304000000002 | 3.2941216999999998   |
| O | 4.2853887000000004   | -4.9520334999999998 | 1.1322291000000000       | O | 3.5290626999999999       | -7.7015022999999996 | 0.17362906000000000  |
| H | 4.1935789999999997   | -5.3002212000000002 | 2.0395476000000001       | H | 2.8198322000000000       | -7.1293806000000002 | 0.52957427999999995  |
| H | 3.3444091000000000   | -4.7392056000000000 | 1.0176788000000001       | H | 4.2749968999999997       | -7.7080479999999998 | 0.87873406000000001  |
| O | -1.7563998999999999  | -4.7775904000000002 | 3.5719690000000002       | O | -1.7999745000000000      | -2.3690047999999999 | 4.6658027000000004   |
| H | -0.76890628000000005 | -4.7717403999999997 | 3.4653182999999999       | H | -1.9134386999999999      | -3.2439657999999998 | 4.1444114000000001   |

|                          |                     |                     |                          |   |                          |                     |                          |
|--------------------------|---------------------|---------------------|--------------------------|---|--------------------------|---------------------|--------------------------|
| H                        | -1.1442230000000000 | -2.7383586000000002 | 5.2694364000000000       | H | -0.75364012E-01          | -0.12442200E+01     | -0.36562322E+00          |
| O                        | -3.0829198999999998 | -2.8171501000000001 | 0.4338024300000002       | H | -0.56833391E+00          | -0.16095103E+01     | 0.22889065E+01           |
| H                        | -2.8089312000000000 | -3.3349766000000001 | -0.2708889900000000      | O | 2.1111304000000000       | -6.4660482999999997 | 1.9632080999999999       |
| H                        | -2.2168231999999999 | -2.4754187999999999 | 0.7448715299999995       | H | 1.7933380000000001       | -5.9129054999999999 | 2.7694412000000002       |
| C                        | 0.13501424E+01      | -0.33051602E+01     | 0.28641344E+01           | H | 2.0607123999999999       | -5.8012088000000004 | 1.2927382000000001       |
| C                        | 0.18344268E+01      | -0.20889042E+01     | 0.34218565E+01           | O | -0.4105638899999999      | -6.2505940000000004 | 0.3333267999999998       |
| O                        | 0.19325007E+01      | -0.10270280E+01     | 0.24891957E+01           | H | 0.2488841000000000       | -5.5321639000000000 | 0.4416213099999999       |
| C                        | 0.15994428E+01      | -0.15789906E+01     | 0.11862378E+01           | H | -0.5711580499999997      | -6.4987493000000001 | 1.2775042999999999       |
| C                        | 0.13970174E+01      | -0.31019271E+01     | 0.14849324E+01           | O | 0.3641866499999999       | -4.9293278000000003 | 4.1453094000000004       |
| O                        | 0.19494882E+01      | -0.16277995E+01     | 0.45753246E+01           | H | 3.7009059000000000       | -4.5418504999999998 | 5.0002376000000002       |
| C                        | 0.30060712E+00      | -0.89327390E+00     | 0.66951033E+00           | H | 2.6479659999999998       | -4.7181062000000002 | 3.9899585000000002       |
| O                        | -0.94819974E+00     | -0.11201129E+01     | 0.14262020E+01           | O | -1.7963380000000000      | -4.8542386000000004 | 3.8097580000000001       |
| O                        | 1.1743889999999999  | -4.0442907000000003 | 0.6053946300000004       | H | -0.7742485799999996      | -4.7936396999999999 | 3.7431372999999999       |
| O                        | 1.1141919000000000  | -4.4122697000000004 | 3.5026586000000002       | H | -1.8839762000000000      | -5.6124900000000002 | 3.2004890000000001       |
| C                        | 0.45849808E+00      | 0.62988194E+00      | 0.72255321E+00           | O | 3.3174285999999999       | -3.3019078999999999 | -1.1119409999999999      |
| O                        | -0.54178686E+00     | 0.12947794E+01      | -0.23090229E-01          | H | 2.5668080000000000       | -3.5795743000000000 | -0.5523900499999997      |
| H                        | 0.24257259E+01      | -0.12211661E+01     | 0.54254565E+01           | H | 3.9086019999999999       | -2.9890149999999999 | -0.4060088000000000      |
| H                        | 0.34576885E+00      | 0.92307393E+00      | 0.17352769E+01           | O | 0.3399932900000000       | -3.3766387000000000 | -1.9140009000000000      |
| H                        | 0.14593573E+01      | 0.95927494E+00      | 0.43069254E+00           | H | 1.1749266999999999       | -3.8243725999999998 | -2.2153212999999998      |
| H                        | -0.14382975E+01     | 0.91910409E+00      | 0.14084429E+00           | H | 0.4262088199999999       | -3.5105602000000000 | -0.9837798700000000      |
| H                        | 0.21283747E+00      | -0.11615157E+01     | -0.3355766E+00           | O | 4.6813390999999998       | -4.7112578999999997 | 1.7228380000000001       |
| H                        | -0.63470042E+00     | -0.15256817E+01     | 0.22594552E+01           | H | 5.0474851999999997       | -3.8092613999999999 | 1.5428329000000001       |
| O                        | 1.9236778000000001  | -6.5198258999999998 | 1.7963971000000001       | H | 4.2626115799999998       | -4.7025306999999996 | 2.6207943999999999       |
| H                        | 1.7002550000000001  | -5.9381012000000002 | 2.5531093000000000       | O | 0.6904110700000002       | -4.5427628999999996 | 6.3862009000000004       |
| H                        | 1.9208889000000000  | -5.7761535999999998 | 1.1544337000000000       | H | 1.2032950500000000       | -5.3129871000000000 | 6.7153470999999998       |
| O                        | -0.5993673400000003 | -6.2014620000000003 | 0.4692827500000003       | H | 0.8410550900000001       | -4.6015817999999999 | 5.4032517999999996       |
| -1.8599211000000001E-002 | -5.4500137000000004 | 0.5821718400000000  | 0.4692827500000003       | O | 0.9365577899999995       | -6.6486061999999997 | 3.1002100000000001       |
| H                        | -0.2156066000000001 | -6.8732889000000004 | 1.0459346000000000       | H | 1.1993845999999999       | -7.7864152000000004 | 2.6219853000000000       |
| O                        | -1.6460467999999999 | -4.9302542999999996 | 3.9081198000000001       | H | 1.5113580000000000       | -9.2567548000000002 | 2.6616206000000000       |
| H                        | -0.6761810299999996 | -4.6994774000000001 | 3.7572583000000002       | O | 4.6268234000000001       | -7.3495336000000000 | 2.6232237000000000       |
| H                        | -1.7181010000000001 | -5.5909807000000002 | 3.1821823000000000       | H | 3.7128969000000001       | -7.0148793999999999 | 2.5629610000000000       |
| O                        | 3.4880475000000000  | -5.3957182000000001 | 4.5592902000000004       | H | 5.0981239000000000       | -6.4943102000000001 | 2.7187171999999999       |
| H                        | 3.8342953000000000  | -4.5136253000000001 | 4.9044321000000002       | O | 3.6755000000000000       | -7.4742895000000003 | -8.9476186999999999E-002 |
| H                        | 2.5794149000000002  | -5.1309167999999996 | 4.2089226000000002       | H | 2.8919236000000001       | -7.3781176999999998 | 0.4808393699999999       |
| O                        | 4.4959353999999996  | -4.8263397000000001 | 1.6054462000000000       | H | 4.3337351000000002       | -7.3340030000000000 | 0.6699959500000001       |
| H                        | 4.2578063000000004  | -3.8619186999999999 | 1.5155858000000000       | O | -1.1274341999999999      | -2.3511370000000000 | 4.7439106999999998       |
| H                        | 4.0748277000000002  | -5.1012243000000002 | 2.4220473999999999       | H | -1.6402239999999999      | -3.1450580000000001 | 4.4954453000000001       |
| O                        | 0.5754125599999996  | -4.5126796000000002 | 6.1324759000000002       | H | -0.3823410199999998      | -2.7282150000000001 | 5.1937857999999997       |
| H                        | 1.2385048000000001  | -5.2035584000000004 | 6.3760912999999997       | C | 0.12739277E+01           | -0.32871721E+01     | 0.27407748E+01           |
| H                        | 0.7233166800000005  | -4.5133444999999996 | 5.1564740999999996       | C | 0.16576097E+01           | -0.20001430E+01     | 0.32748647E+01           |
| O                        | 0.1220226200000000  | -3.4943746000000000 | -1.8547138999999999      | O | 0.18733521E+01           | -0.10940615E+01     | 0.22866174E+01           |
| H                        | 0.7280096000000003  | -4.0181300999999996 | -2.3985365999999999      | O | 0.15944258E+01           | -0.17891065E+01     | 0.10297440E+01           |
| H                        | 0.4543610499999999  | -3.5353243000000001 | -0.9427256299999998      | C | 0.13261697E+01           | -0.32548874E+01     | 0.13758415E+01           |
| O                        | 3.5196371000000002  | -3.6946642999999999 | -1.1844572000000000      | O | 0.18791802E+01           | -0.17292350E+01     | 0.44803904E+01           |
| H                        | 2.7214626000000002  | -3.9256053999999998 | -0.7375001900000000      | C | 0.34377965E+00           | -0.11029811E+01     | 0.43778160E+00           |
| H                        | 4.1063727999999999  | -3.2792110999999999 | -0.5900119000000003      | O | -0.85198274E+00          | -0.13798078E+01     | 0.12815121E+01           |
| O                        | 3.6850754000000001  | -7.4347567000000003 | -0.1647475300000000      | O | 1.3965870000000000       | -4.1998607999999997 | 0.5226824500000002       |
| H                        | 2.9162938000000000  | -6.8687503000000003 | 0.2367088300000001       | O | 1.0889310999999999       | -4.4398980000000003 | 3.5021198000000000       |
| H                        | 4.3468385999999999  | -7.2642861999999999 | 0.5175397699999995       | C | 0.57200965E+00           | 0.39076278E+00      | 0.31685233E+00           |
| O                        | 0.8152090199999995  | -8.7458437999999994 | 3.1531964000000001       | O | -0.39936967E+00          | 0.11263051E+01      | -0.48157668E+00          |
| H                        | 0.9368400799999996  | -7.8402893000000002 | 2.9504310000000000       | H | 0.24548863E+01           | -0.15137533E+01     | 0.38065964E+00           |
| H                        | 1.6035435000000000  | -9.1738143999999995 | 2.8121939999999999       | H | 0.52863346E+00           | 0.81522425E+00      | 0.13434511E+01           |
| O                        | -1.4642177000000001 | -2.1737072999999998 | 4.6824612999999999       | H | 0.15371168E+01           | 0.63221574E+00      | -0.44343745E-01          |
| H                        | -2.0568369999999998 | -2.8408864000000000 | 4.2441632000000000       | H | -0.13229631E+01          | 0.87040183E+00      | -0.27738325E+00          |
| H                        | -0.8714321299999997 | -2.8020706999999998 | 5.0411142000000000       | H | 0.13207563E+00           | -0.14905979E+01     | -0.57967461E+00          |
| O                        | -3.0381027999999999 | -2.9554301999999999 | 0.4570352100000003       | H | -0.56266302E+00          | -0.15647942E+01     | 0.22043193E+01           |
| H                        | -2.5513397000000002 | -3.6300430000000001 | -5.8299220999999998E-002 | O | 1.6137056000000001       | -6.6691244000000003 | 1.9294016000000000       |
| H                        | -2.2570863999999999 | -2.4068947000000001 | 0.6944553000000000       | H | 1.3723285999999999       | -6.0427898000000004 | 2.6209673000000002       |
| C                        | 0.12849221E+01      | -0.34216006E+01     | 0.27696341E+01           | H | 1.8230705000000000       | -5.9475870000000004 | 1.2955167000000001       |
| C                        | 0.17614761E+01      | -0.21672592E+01     | 0.33045682E+01           | O | -0.6615907600000000      | -6.0279097999999998 | 0.3024917699999999       |
| O                        | 0.19032614E+01      | -0.11762066E+01     | 0.24167659E+01           | H | -6.4442868000000000E-002 | -5.2439714999999998 | 0.4461708899999999       |
| C                        | 0.14387332E+01      | -0.16934910E+01     | 0.10807656E+01           | H | -0.2598096100000002      | -6.5984578000000003 | 0.9802270400000005       |
| C                        | 0.13227643E+01      | -0.32312528E+01     | 0.14294698E+01           | O | 3.5966857999999999       | -5.1166723000000003 | 4.2781472999999997       |
| O                        | 0.21368328E+01      | -0.18866838E+01     | 0.44862559E+01           | H | 3.5594125999999999       | -4.3462548999999999 | 4.9500621000000002       |
| C                        | 0.23007241E+00      | -0.86356717E+00     | 0.06782752E+00           | H | 2.6931542999999998       | -5.0582846999999997 | 3.8868450000000001       |
| O                        | -0.89846412E+00     | -0.10507897E+01     | 0.15540012E+01           | O | -1.5824658000000000      | -4.9739887999999999 | 3.9826183999999998       |
| O                        | 1.1323517000000001  | -4.0866239999999998 | 0.47979040000000001      | H | -0.6061152199999995      | -4.7462285000000000 | 3.8685067000000002       |
| O                        | 1.1075611999999999  | -4.5768190000000004 | 3.5010606000000002       | H | -1.6708407000000001      | -5.6140176000000004 | 3.2671758999999998       |
| C                        | 0.54130873E+00      | 0.64999714E+00      | 0.55338024E+00           | O | 4.5994522000000000       | -4.2979786999999998 | 1.7097164000000000       |
| O                        | -0.35929943E+00     | 0.13796066E+01      | -0.27447529E+00          | H | 4.8126992000000000       | -3.3280460000000001 | 1.6734171000000000       |
| H                        | 0.22807958E+01      | -0.14998624E+01     | 0.42124551E+00           | H | 4.1238625000000004       | -4.2980292000000002 | 2.5926919000000002       |
| H                        | 0.61949592E+00      | 0.11357394E+01      | 0.15074007E+01           | O | 0.2671526599999999       | -3.8003999999999998 | -1.9873167000000000      |
| H                        | 0.15241922E+01      | 0.73437604E+00      | 0.10288120E+00           | H | 1.0468904999999999       | -4.2121063000000003 | -2.3955590000000000      |
| H                        | -0.12566712E+01     | 0.10883285E+01      | 0.25440453E-02           | H | 0.4134571400000000       | -3.9917199999999999 | -1.0091755000000000      |
|                          |                     |                     |                          | O | 0.8045179399999999       | -4.2958232000000001 | 6.1213902999999998       |

|   |                         |                     |                     |   |                          |                     |                          |
|---|-------------------------|---------------------|---------------------|---|--------------------------|---------------------|--------------------------|
| H | 1.2870621000000000      | -5.1455342000000002 | 6.2880849999999997  | C | 0.16461734E+01           | -0.17688466E+01     | 0.10817010E+01           |
| H | 0.97047022000000005     | -4.2452471000000003 | 5.1602793000000000  | C | 0.15022681E+01           | -0.32447639E+01     | 0.13574831E+01           |
| O | 3.7499698000000001      | -3.5822482000000000 | -1.0590529000000000 | O | 0.18446402E+01           | -0.15978704E+01     | 0.44353691E+01           |
| H | 3.0069707999999999      | -3.9635951000000000 | -0.6278382799999997 | C | 0.41312425E+00           | -0.11038407E+01     | 0.48162084E+00           |
| H | 3.8906398000000002      | -2.8786505999999998 | -0.3893654999999998 | O | -0.77533666E+00          | -0.13578761E+01     | 0.12751812E+01           |
| O | -1.4326781000000000     | -2.1871383999999998 | 4.9442513999999997  | O | 1.4887242000000001       | -4.1431152000000004 | 0.5108836100000004       |
| H | -1.8982794999999999     | -3.2152330000000001 | 4.8945648000000004  | O | 1.2812116000000000       | -4.4256542000000003 | 3.4457670000000000       |
| H | -0.56839236000000004    | -2.5943016000000001 | 5.0494824999999999  | C | 0.57687707E+00           | 0.32352497E+00      | 0.30731417E+00           |
| O | 4.6143209000000001      | -7.3318477000000000 | 2.4396269999999998  | O | -0.44369623E+00          | 0.96244324E+00      | -0.47356504E+00          |
| H | 4.1007331000000002      | -6.8192534000000000 | 3.1611609000000001  | H | 0.24408319E+01           | -0.15448855E+01     | 0.32185093E+00           |
| H | 5.3592896000000003      | -6.7863140000000000 | 2.2277955000000000  | H | 0.55601626E+00           | 0.80587056E+00      | 0.12775492E+01           |
| O | -2.8929635000000000     | -3.0787957000000001 | 0.5196149199999998  | H | 0.15507487E+01           | 0.49277117E+00      | -0.24020955E+00          |
| H | -2.7957111000000001     | -3.0711141000000000 | -0.4282643400000002 | H | -0.12682720E+01          | 0.52578320E+00      | -0.40933270E+00          |
| H | -2.0876579000000000     | -2.5600291999999998 | 0.7644078500000000  | H | 0.28677464E+00           | -0.15748979E+01     | -0.45637235E+00          |
| O | 0.85756306000000004     | -9.0702984000000004 | 3.0522165000000001  | H | -0.53397976E+00          | -0.20566903E+01     | 0.18823821E+01           |
| H | 1.3053684999999999      | -8.2282843999999997 | 2.8712754000000000  | O | 1.4677338000000000       | -6.6609482000000000 | 1.8608332999999999       |
| H | 1.5841489000000000      | -9.7576084999999999 | 2.9898764999999998  | H | 1.4654581000000000       | -5.9411388000000001 | 2.6117634000000001       |
| C | 0.13992176E+01          | -0.33646787E+01     | 0.27481709E+01      | H | 1.6590973000000000       | -6.0641243999999999 | 1.0849747999999999       |
| C | 0.18438073E+01          | -0.21240672E+01     | 0.32393651E+01      | O | -5.179682417999999998    | 0.1779684000000004  | 4.0775642000000003       |
| O | 0.21068793E+01          | -0.11985395E+01     | 0.22376780E+01      | H | 3.7594102999999999       | -4.5294403000000001 | 4.8332043999999996       |
| C | 0.16620098E+01          | -0.17512470E+01     | 0.10005456E+01      | H | 2.9473758999999999       | -5.0118881999999996 | 3.6135868000000002       |
| C | 0.14225821E+01          | -0.32621555E+01     | 0.13275015E+01      | O | -0.8285991799999999      | -6.1579525999999998 | 0.2513435199999999       |
| O | 0.21330305E+01          | -0.16063213E+01     | 0.43496219E+01      | H | -4.1326537000000003E-002 | -5.7215841999999997 | 0.63531088000000002      |
| C | 0.39108655E+00          | -0.11110938E+01     | 0.43838629E+00      | H | -1.2603146000000001      | -6.5775907000000000 | 1.0644216000000000       |
| O | -0.70581355E+00         | -0.13169897E+01     | 0.12808979E+01      | O | -1.6003261000000000      | -4.6409849999999997 | 3.8767284000000002       |
| O | 1.2220131000000001      | -4.1711516000000000 | 0.4466940899999999  | H | -0.6682460000000001      | -4.8302322999999996 | 3.6678889999999999       |
| O | 1.2124016000000000      | -4.4221994000000002 | 3.5232323999999999  | H | -2.0753437000000002      | -5.3214411000000004 | 3.3004424000000001       |
| C | 0.52940465E+00          | 0.40958228E+00      | 0.33126890E+00      | O | 0.3648800899999999       | -3.7742064000000002 | -1.9862841000000000      |
| O | -0.55931473E+00         | 0.10707587E+01      | 0.41460362E+00      | H | 0.7630244800000000       | -4.3943399999999997 | -2.5979250000000000      |
| H | 0.25077744E+01          | -0.16277313E+01     | 0.22234792E+00      | H | 0.6904060300000000       | -4.0341101000000004 | -1.1117770000000000      |
| H | 0.62450058E+00          | 0.84111081E+00      | 0.13187586E+01      | O | -4.5314626000000002      | -4.5314626000000003 | 1.4679498000000000       |
| H | 0.14997032E+01          | 0.63901978E+00      | -0.22624059E+00     | H | 4.8373830000000000       | -3.5807148999999998 | 1.3049778000000001       |
| H | -0.14217193E+01         | 0.69601617E+00      | -0.87016147E-01     | H | 4.6025631999999996       | -4.6397852000000004 | 2.4395720000000001       |
| H | 0.20609766E+00          | -0.16219759E+01     | -0.55527704E+00     | O | 0.8841543100000000       | -6.0625457999999998 | 0.0625457999999999       |
| H | -0.41756231E+00         | -0.18974458E+01     | 0.20506024E+01      | H | 1.3462955999999999       | -4.9416566000000000 | 6.2294248000000003       |
| O | 1.6169054000000000      | -6.6511402999999998 | 1.7799765999999999  | H | 1.1526156999999999       | -3.9448702999999998 | 5.1830612000000000       |
| H | 1.6984716000000000      | -5.9467195999999998 | 2.4015564999999999  | O | 3.4620392999999998       | -7.1352934000000001 | -4.3318601999999998E-002 |
| H | 1.3745148000000000      | -6.0702784000000003 | 1.0096722000000000  | H | 2.6116552999999998       | -7.4458241999999997 | 0.3014135199999999       |
| O | 3.7616529999999999      | -5.0274524999999999 | 4.1740424000000003  | H | 3.5106066999999999       | -6.3252427000000004 | 0.4988461200000000       |
| H | 3.5592676000000001      | -4.5586422999999998 | 4.9942190000000002  | O | 3.9791338000000001       | -3.8293544000000002 | -1.1240095000000001      |
| H | 2.8671217000000002      | -4.7769678999999998 | 3.7801426999999999  | H | 3.1166782999999998       | -4.1440261999999999 | -0.8720279199999996      |
| O | -0.8212717000000005     | -6.0216900999999998 | 0.1538533000000000  | H | 4.1770889999999996       | -3.2572874000000001 | -0.4401062900000001      |
| H | -0.2105013299999999     | -5.2390869999999996 | 0.1782072399999999  | O | 4.8673450999999996       | -7.2437664000000002 | 2.6260576000000002       |
| H | -0.5724758399999996     | -6.4165584999999998 | 0.9833536800000001  | H | 4.1827443000000004       | -6.6019182000000001 | 2.8598219000000000       |
| O | -1.4424391000000001     | -8.2677373000000004 | 4.0249823999999998  | H | 5.6863049999999999       | -6.7308003999999997 | 2.4578215000000001       |
| H | -0.45348347000000000    | -4.8042670000000003 | 3.9735775000000002  | O | 1.0905609000000001       | -9.0554420000000002 | 3.1800508000000001       |
| H | -1.6394629000000001     | -5.4305933000000000 | 3.3187533999999999  | H | 1.0420113000000000       | -8.1741545999999996 | 2.7352916000000000       |
| O | 8.6225906000000005E-002 | -3.8275066999999998 | -1.9214221199999999 | H | 1.8094313000000000       | -9.5042542000000001 | 2.6501960000000002       |
| H | 0.61217529000000004     | -4.4088095999999997 | -2.4600415999999998 | O | -3.0466693000000000      | -3.1022308999999999 | 0.34633129000000001      |
| H | 0.47382595000000000     | -3.9540541000000000 | -1.0908462000000001 | H | 2.8330394000000001       | -3.5103751999999999 | -0.4907902499999998      |
| O | 0.60534723000000001     | -4.2952821999999999 | 6.2306882999999997  | H | -2.1851438999999999      | -2.6791448000000000 | 0.6977017899999999       |
| H | 1.0599280000000000      | -5.1141284000000002 | 6.4765924000000004  | C | 0.15662633E+01           | -0.32526762E+01     | 0.27469064E+01           |
| H | 0.93024074000000001     | -4.2872633999999996 | 5.3039914000000001  | C | 0.16159668E+01           | -0.19490276E+01     | 0.32832259E+01           |
| O | 3.8739686000000000      | -3.5468098000000001 | -1.1387252999999999 | O | 0.17948473E+01           | -0.93777689E+00     | 0.23962709E+01           |
| H | 2.9886100000000000      | -3.8273826999999998 | -0.9518374600000002 | C | 0.17071634E+01           | -0.15821177E+01     | 0.11239615E+01           |
| H | 4.0938490999999999      | -2.9556239999999998 | -0.3333550699999998 | C | 0.16313408E+01           | -0.30935094E+01     | 0.13716045E+01           |
| O | 4.7494328000000001      | -4.6149091000000002 | 1.5997755000000000  | O | 0.16136869E+01           | -0.16440159E+01     | 0.45215580E+01           |
| H | 5.0979761999999997      | -3.7312373000000001 | 1.4191705999999999  | C | 0.47080737E+00           | -0.10413938E+01     | 0.38700870E+00           |
| H | 4.6310490000000000      | -4.5220146999999997 | 2.5429203000000000  | O | -0.71327381E+00          | -0.13642610E+01     | 0.10781492E+01           |
| O | 3.8807488999999999      | -7.1651575999999997 | -0.1631878800000001 | O | 1.5533375000000000       | -4.0284350000000000 | 0.52828251999999998      |
| H | 2.9526995000000000      | -7.1406485000000002 | 0.1403510799999999  | O | 1.4551318000000000       | -4.3944004000000003 | 3.3530180999999999       |
| H | 4.3009104999999996      | -6.5854436999999999 | 0.4631722700000000  | C | 0.51593517E+00           | 0.50955071E+00      | 0.20355520E+00           |
| O | -2.8935613999999998     | -2.9900701000000001 | 0.7427500500000005  | O | -0.60506640E+00          | 0.11378480E+01      | -0.477979540E+00         |
| H | -2.8596138999999998     | -3.3384713000000001 | -0.1522548200000001 | H | 0.25819638E+01           | -0.13990035E+01     | 0.49860205E+00           |
| H | -1.9866813000000001     | -2.5669059000000001 | 0.8039704899999998  | H | 0.72302112E+00           | 0.98902322E+00      | 0.12072936E+01           |
| O | 0.8580193699999995      | -9.1273511000000003 | 2.6968695999999999  | O | 0.14766160E+01           | 0.66104160E+00      | -0.41419090E+00          |
| H | 0.8144906699999997      | -8.2299462999999999 | 2.3593212000000001  | H | -0.13460317E+01          | 0.72745749E+00      | 0.13111015E-01           |
| H | 1.8495592999999999      | -9.1424140000000005 | 2.6265105000000002  | H | 0.49808391E+00           | -0.16331999E+01     | -0.56809302E+00          |
| O | -1.0960970000000001     | -2.2352175999999999 | 5.4364505000000003  | H | -0.51863525E+00          | -0.19346547E+01     | 0.17988567E+01           |
| H | -1.4220027000000000     | -2.8069350000000002 | 4.7246467000000001  | O | 1.2544194000000000       | -6.6443409999999998 | 1.7854219000000000       |
| H | -0.4865796000000000     | -2.9044710000000000 | 5.8138202999999997  | H | 1.2938274000000001       | -6.4083313999999998 | 2.7417677999999999       |
| C | 0.14395272E+01          | -0.32740384E+01     | 0.27426258E+01      | H | 1.4665615999999999       | -5.7851907999999996 | 1.4683351000000000       |
| C | 0.18035445E+01          | -0.20213813E+01     | 0.32456897E+01      | O | 3.7301104000000000       | -5.1491902999999999 | 4.2735988999999996       |
| O | 0.20281644E+01          | -0.10801368E+01     | 0.22599319E+01      | H | 3.9365283000000000       | -4.5285960000000000 | 4.9984599999999997       |
|   |                         |                     |                     | H | 2.8490250000000001       | -4.8194322999999999 | 3.9634960000000001       |

|   |                      |                      |                          |   |                          |                      |                      |
|---|----------------------|----------------------|--------------------------|---|--------------------------|----------------------|----------------------|
| O | -1.4145194000000001  | -4.9529934999999998  | 4.0387472000000004       | O | -0.75065068999999995     | -1.9265559999999999  | 4.8818818999999998   |
| H | -0.50965612000000005 | -4.9262690999999998  | 3.6053386999999999       | H | -1.3973802000000000      | -2.6642548000000002  | 4.9013333000000001   |
| H | -1.8737893999999999  | -5.6991087000000000  | 3.6710009000000001       | H | 5.39669720000000002E-002 | -2.3912007000000002  | 4.9857519999999997   |
| O | -0.86669251000000003 | -6.4330768999999997  | 3.1341985000000003E-002  | O | 4.33489050000000002      | -7.6233835000000001  | 2.8754721999999999   |
| H | -0.10713817000000000 | -6.3797246999999997  | 0.6533684499999999       | H | 3.8991676000000002       | -6.8699648000000000  | 3.3328126999999999   |
| H | -1.54046700000000000 | -6.4715179999999997  | 0.7578657399999999       | H | 5.1416259999999996       | -7.2035952999999999  | 2.5818827999999998   |
| O | 4.76584990000000001  | -4.6209750999999999  | 1.5973531000000001       | O | 0.71722801000000003      | -9.0840250999999999  | 2.8800867999999999   |
| H | 4.79963060000000004  | -3.6640804000000000  | 1.7988966000000000       | H | 0.78166764000000000      | -8.3116641999999992  | 2.3009255999999998   |
| H | 4.40994759999999997  | -4.9614294000000001  | 2.3861786000000000       | H | 1.47232509999999999      | -9.5815728999999994  | 2.5632024000000002   |
| O | 3.59671800000000001  | -7.1201502000000003  | 0.12959055999999999      |   |                          |                      |                      |
| H | 2.78732949999999998  | -6.7908379999999999  | 0.46093926000000002      | C | 0.15045093E+01           | -0.32110083E+01      | 0.26680412E+01       |
| H | 4.09005319999999998  | -7.2312709000000002  | 0.98539560000000004      | C | 0.19915883E+01           | -0.1954609E+01       | 0.31279319E+01       |
| O | 0.14258353000000001  | -4.1613005999999997  | -2.0826069999999999      | O | 0.20754057E+01           | -0.98571582E+00      | 0.20727055E+01       |
| H | 0.74733105000000000  | -4.7773294000000002  | -2.5763113999999998      | C | 0.18212021E+01           | -0.17360099E+01      | 0.79264380E+00       |
| H | 0.56812289999999999  | -4.0222217000000002  | -1.2549653999999999      | C | 0.15467484E+01           | -0.32303695E+01      | 0.12351678E+01       |
| O | 0.76012703999999998  | -4.0498190000000003  | 6.1504477000000000       | C | 0.22764863E+01           | -0.16308411E+01      | 0.43078686E+01       |
| H | 1.28297820000000001  | -4.9059705999999998  | 6.3210278000000004       | C | 0.61402758E+00           | -0.14852241E+01      | 0.14585221E+00       |
| H | 1.03414160000000001  | -3.9213881000000002  | 5.2305197999999997       | O | -0.55018457E+00          | -0.13784118E+01      | 0.99489632E+00       |
| O | 4.31957280000000004  | -3.9362690000000001  | -1.0894356000000001      | O | 1.23944500000000001      | -4.1870488000000003  | 0.41799901000000000  |
| H | 3.62936369999999999  | -3.9258266000000002  | -0.64737661999999996     | O | 1.32478970000000000      | -4.1852635999999999  | 3.5555226000000002   |
| H | 4.63994220000000001  | -2.8080843000000000  | -0.31252414000000001     | C | 0.71614697E+00           | 0.35320917E+00       | -0.14300564E+00      |
| O | 4.43234260000000001  | -7.17574712000000000 | 2.6771512000000000       | O | 0.46488432E+00           | 0.83417625E+00       | -0.72616085E+00      |
| H | 3.83123039999999999  | -6.5628986999999999  | 3.2083146999999999       | H | 0.27048404E+01           | -0.16598402E+01      | 0.23370974E+00       |
| H | 5.25007170000000003  | -6.6651702999999998  | 2.4551826000000001       | H | 0.92545755E+00           | 0.92317455E+00       | 0.78399623E+00       |
| O | 3.73394730000000001  | -2.8928932000000001  | 5.9950302000000004       | H | 0.15297809E+01           | 0.60621016E+00       | -0.84280544E+00      |
| H | 2.92313680000000000  | -2.7754500000000002  | 5.5076935999999996       | H | -0.12335801E+01          | 0.63700557E+00       | -0.17589174E+00      |
| H | 4.14348510000000004  | -1.9918947000000000  | 5.9871274999999997       | H | 0.38124960E+00           | -0.17216535E+01      | -0.79535805E+00      |
| O | 1.02578850000000000  | -9.1567483999999997  | 3.31748280000000001      | O | -0.31848074E+00          | -0.18064722E+01      | 0.18453509E+01       |
| H | 0.92797848999999999  | -8.4757438999999994  | 2.5932966999999998       | O | 1.36438189999999999      | -6.5273838000000000  | 1.8992663999999999   |
| H | 1.92421630000000001  | -9.5558209999999999  | 3.0513469999999998       | H | 1.10724840000000000      | -5.8563964000000004  | 2.5826033000000002   |
|   |                      |                      |                          | H | 1.63834830000000001      | -5.7835017000000004  | 1.2726401000000001   |
| C | 0.15549846E+01       | -0.33313730E+01      | 0.27446831E+01           | O | -1.35885630000000000     | -4.6252332999999997  | 3.6273624000000000   |
| C | 0.19700836E+01       | -0.20443995E+01      | 0.31675962E+01           | H | -0.37308331000000000     | -4.5677779999999997  | 3.6207425000000000   |
| O | 0.20983832E+01       | -0.11084801E+01      | 0.21005525E+01           | H | -1.49327999999999999     | -5.3713097999999999  | 3.0448491000000000   |
| C | 0.17080653E+01       | -0.18829267E+01      | 0.93119380E+00           | O | 3.74120799999999999      | -5.1836774999999999  | 4.1401579000000002   |
| C | 0.15709492E+01       | -0.33221313E+01      | 0.13365417E+01           | H | 3.80235730000000001      | -4.4700081000000003  | 4.7506453000000004   |
| O | 0.20779266E+01       | -0.16194025E+01      | 0.43156635E+01           | H | 2.78053520000000001      | -5.0963535999999996  | 3.8632211000000001   |
| C | 0.38426206E+00       | -0.12958987E+01      | 0.35811888E+00           | O | 4.60588199999999998      | -4.8008350999999996  | 1.7418369000000000   |
| O | -0.82368889E+00      | -0.16731345E+01      | 0.10666312E+01           | H | 4.72360169999999997      | -3.8803793999999998  | 1.4930976000000000   |
| O | 1.37258250000000000  | -4.2715325000000004  | 0.49279817999999997      | H | 4.30372760000000002      | -4.6390599000000003  | 2.6350658999999998   |
| O | 1.34421180000000001  | -4.3015492999999996  | 3.6058078999999998       | O | 2.61358150000000000E-003 | -4.2079838000000001  | -1.9530400999999999  |
| C | 0.48865137E+00       | 0.19250805E+00       | 0.19794568E+00           | O | 4.47795613999999997      | -4.9760429000000004  | -2.3099999000000002  |
| O | -0.46118937E+00      | 0.82541701E+00       | -0.76954670E+00          | H | 0.55573360000000005      | -4.15307630000000002 | -1.1280060600000000  |
| H | 0.25103469E+01       | -0.16186008E+01      | 0.21708024E+01           | O | -0.79882123999999999     | -6.7325729000000001  | -0.12764745999999999 |
| H | 0.32834517E+00       | 0.50609619E+00       | 0.12388261E+01           | H | -4.5704119000000001E-002 | -6.7747466999999997  | 0.45743665999999999  |
| H | 0.14609629E+01       | -0.20805109E+00      | -0.20805109E+00          | H | -1.52543260000000000     | -6.7469489999999999  | 0.54478643000000004  |
| H | -0.13241784E+01      | 0.41063063E+01       | -0.46851108E+00          | O | 0.922118568999999995     | -4.4630576000000000  | 6.2764445999999996   |
| H | 0.33757168E+00       | -0.17161265E+00      | -0.68760754E+00          | H | 1.47820939999999999      | -5.2440135999999997  | 6.4079101999999999   |
| H | -0.52849048E+00      | -0.21899701E+01      | 0.18331370E+01           | H | 1.22062889999999999      | -4.1804606000000000  | 5.3742552000000003   |
| O | 1.49400559999999999  | -6.5507942999999997  | 2.07131990000000002      | O | 3.53074360000000001      | -6.7306176999999997  | -0.14507653000000001 |
| H | 1.47323200000000001  | -5.9669463000000000  | 2.8575959000000002       | H | 2.87330800000000002      | -7.2577744400000000  | 0.33265404999999998  |
| H | 1.34171730000000000  | -5.9368707000000001  | 1.4140623000000001       | H | 3.87100110000000000      | -6.2277823000000003  | 0.60535092000000001  |
| O | 3.84476530000000002  | -5.2194668000000002  | 4.3158652999999996       | O | 4.21533219999999998      | -3.7886153999999999  | -1.2601925000000000  |
| H | 3.87851230000000001  | -4.4150637000000001  | 4.8549429000000002       | H | 3.34334240000000000      | -4.0539021999999996  | -0.9733384299999998  |
| H | 2.95398460000000001  | -5.0249326999999999  | 3.9121277999999999       | H | 4.5778876999999998       | -3.3648842999999999  | -0.49139829000000002 |
| O | -1.43154859999999999 | -4.5481924999999999  | 4.0481463000000000       | O | -0.99099696999999998     | -2.1157493999999999  | 4.6551099999999996   |
| H | -0.44947963000000002 | -4.5402747999999997  | 4.0773149000000002       | H | -1.48073499999999999     | -2.8233613000000002  | 4.1339264000000000   |
| H | -1.56143890000000000 | -5.2564446000000000  | 3.3669972000000001       | H | -0.21566647000000000     | -2.6752204000000002  | 4.9436890000000000   |
| O | -1.00506699999999999 | -6.2388814999999997  | -9.5481626000000000E-002 | O | 4.40528519999999998      | -7.43312360000000001 | 2.7433337999999998   |
| H | -0.42367116999999999 | -5.5759580000000000  | 0.28047767000000001      | C | 3.88422119999999998      | -6.7490788000000004  | 3.1560963000000002   |
| H | -1.37495200000000000 | -6.5207929000000000  | 0.76569293000000005      | H | 5.20064510000000000      | -7.0106973000000004  | 2.4887888000000000   |
| O | 0.19700086000000000  | -3.8724851999999998  | -1.8630807000000000      | O | 0.92062597000000002      | -8.8650009999999996  | 3.0220411000000000   |
| H | 0.61392846000000001  | -4.6225351999999997  | -2.3772593000000000      | H | 1.18847250000000000      | -7.9833039000000001  | 2.6415571000000000   |
| O | 0.62438747000000006  | -4.0154513999999999  | -0.9442018399999996      | H | 1.51598330000000000      | -9.4022924999999997  | 2.5108614999999999   |
| O | 4.46900109999999998  | -4.8604402999999996  | 1.5712168000000000       |   |                          |                      |                      |
| H | 4.59096789999999999  | -3.9199763000000001  | 1.5931024000000000       | C | 0.15228785E+01           | -0.34224646E+01      | 0.26940265E+01       |
| H | 4.34322639999999998  | -5.1059798000000001  | 2.5473246999999999       | C | 0.18759526E+01           | -0.20742920E+01      | 0.31207802E+01       |
| O | 4.08447870000000000  | -3.5465556999999999  | -1.0232720000000000      | O | 0.19475394E+01           | -0.12559390E+01      | 0.20255322E+01       |
| H | 3.14482239999999998  | -3.6491942000000002  | -0.60705260000000005     | C | 0.16632525E+01           | -0.19911156E+01      | 0.87673486E+00       |
| H | 4.60617900000000000  | -3.0502992999999998  | -0.3558465599999998      | C | 0.13760896E+01           | -0.33900021E+01      | 0.13319735E+01       |
| O | 3.30737209999999998  | -6.7849554000000003  | -0.14548367000000001     | O | 0.20338255E+01           | -0.15416814E+01      | 0.42171007E+01       |
| H | 2.60618619999999998  | -6.9822923000000001  | 0.46160065000000000      | C | 0.39199041E+00           | -0.13181199E+01      | 0.10596964E+00       |
| H | 3.58272650000000001  | -6.0176109999999996  | 0.32222609000000002      | O | -0.80515249E+00          | -0.15650301E+01      | 0.91124416E+00       |
| O | 1.00639269999999999  | -4.3198566999999999  | 6.3059165000000004       | O | 1.15200700000000000      | -4.3638937999999996  | 0.49424407999999997  |
| H | 1.52703530000000001  | -5.1066519999999999  | 6.6427334000000000       | O | 1.37810140000000000      | -4.4244415000000004  | 3.5677770000000000   |
| H | 1.25929890000000001  | -4.1793893000000004  | 5.3693819999999999       | C | 0.51784809E+00           | 0.11250931E+00       | -0.44425030E-01      |

|   |                          |                     |                          |   |                      |                     |                          |
|---|--------------------------|---------------------|--------------------------|---|----------------------|---------------------|--------------------------|
| O | -0.59360697E+00          | 0.77599476E+00      | -0.76639235E+00          | H | -1.0975984999999999  | -6.9609272999999998 | 0.54616942999999996      |
| H | 0.25484351E+01           | -0.19308239E+01     | 0.22617045E+00           | O | 4.6993736999999998   | -5.0059239000000000 | 1.6447961000000000       |
| H | 0.69902658E+00           | 0.65952472E+00      | 0.92243190E+00           | H | 4.5745475999999998   | -4.0260714000000002 | 1.4953780000000001       |
| H | 0.15133610E+01           | 0.37565155E+00      | -0.56918538E+00          | H | 4.9448958000000003   | -5.0088233999999998 | 2.6007636000000001       |
| H | -0.13243149E+01          | 0.15872408E+00      | -0.61764082E+00          | O | 3.3212136000000001   | -6.9045380999999999 | -0.12782504000000000     |
| H | 0.19029769E+00           | -0.19267650E+01     | -0.79820279E+00          | H | 2.5689703000000002   | -7.3029716000000002 | 0.33714988000000001      |
| H | -0.65572586E+00          | -0.22598915E+01     | 0.15346451E+01           | H | 3.6618906999999998   | -6.2793951999999997 | 0.5191624299999995       |
| O | 1.5775300999999999       | -6.5439572999999998 | 2.0429735999999998       | O | 0.84929511000000002  | -4.5463588000000001 | 6.1882352000000003       |
| H | 1.4373404000000001       | -5.8092385999999996 | 2.6605804000000002       | H | 1.2977358000000001   | -5.3846958999999996 | 6.4485241999999996       |
| H | 1.4160896000000001       | -5.9500413999999999 | 1.2459941000000001       | H | 1.1849483000000001   | -4.3628430000000001 | 5.2689466999999999       |
| O | -1.1977224000000000      | -4.8488781999999997 | 3.8632637000000001       | O | 0.15620993000000000  | -4.0067972000000003 | -2.0712180999999998      |
| H | -0.25784657999999999     | -4.7338003000000004 | 3.8272656999999999       | H | 0.85414948999999996  | -4.3979287999999999 | -2.6007668000000002      |
| H | -1.2948070000000000      | -5.4408925999999997 | 3.1513105000000001       | H | 0.60387332000000005  | -4.0379794000000002 | -1.1770073999999999      |
| O | -0.7091832399999999      | -6.4587763999999996 | -3.2828314999999997E-002 | O | 0.68816290000000002  | -8.7185337000000001 | 3.4855898999999999       |
| H | -2.0368417999999999E-002 | -5.8145522999999999 | 0.19839688000000000      | H | 1.01553910000000000  | -7.9748516000000000 | 2.9997384999999999       |
| H | -1.0600754999999999      | -6.6947947000000001 | 0.89131322999999996      | H | 1.33471980000000000  | -9.3415645000000005 | 3.1355746999999998       |
| O | 3.9483356000000001       | -5.1497117000000001 | 4.2887040000000001       | O | 4.5777175999999997   | -7.6851969000000000 | 3.1369932999999999       |
| H | 4.1053018000000003       | -4.4139579999999997 | 4.9975548999999999       | H | 4.2026348999999996   | -6.8728864999999999 | 3.6225052999999998       |
| H | 3.0325902000000000       | -8.8375509000000003 | 4.1194078999999997       | H | 5.4883094999999997   | -7.3657108999999998 | 2.9447796999999998       |
| O | 0.82695929000000001      | -4.5718481999999998 | 6.1673220999999998       | O | 4.82180520000000000  | -2.2604706000000001 | 0.97129178000000005      |
| H | 1.2822283000000001       | -5.4777260999999999 | 6.1549994999999997       | H | 4.6542164000000001   | -1.5328349999999999 | 1.5848156000000000       |
| H | 1.0773356999999999       | -4.3935013999999999 | 5.2399448000000000       | H | 5.7569971000000004   | -2.0085088000000000 | 0.61491006000000000      |
| O | 3.4288368000000000       | -6.5804967999999997 | -8.3707816000000004E-002 | C | 0.16255096E+01       | -0.34316977E+01     | 0.26317527E+01           |
| H | 2.7119490000000002       | -6.8763218999999998 | 0.54634488000000003      | C | 0.19432184E+01       | -0.20769633E+01     | 0.31141704E+01           |
| H | 4.0325274000000002       | -6.1854129000000002 | 0.57890516000000003      | C | 0.18880464E+01       | -0.10897577E+01     | 0.20677335E+01           |
| O | -2.3159616000000001E-002 | -4.2043312999999998 | -2.0627585000000002      | C | 0.16110429E+01       | -0.18585977E+01     | 0.87826413E+00           |
| H | 0.42601364000000003      | -4.7160672000000003 | -2.7351470999999998      | C | 0.14998020E+01       | -0.33207002E+01     | 0.12291224E+01           |
| H | 0.53385064999999998      | -3.1452219999999999 | -1.2597693000000001      | C | 0.22786455E+01       | -0.16849696E+01     | 0.42462837E+01           |
| O | 4.9201743999999996       | -4.8124402999999996 | 1.7455153000000001       | O | 0.33580513E+00       | -0.13823395E+01     | 0.11245411E+00           |
| H | 4.9525544999999997       | -3.8183139000000001 | 1.6232013000000001       | C | 0.90161077E+00       | -0.17006226E+01     | 0.72716302E+00           |
| H | 4.5627122000000000       | -4.8691722999999998 | 2.7061226999999999       | O | 1.2300660000000001   | -4.2487985999999998 | 0.34326060000000003      |
| O | 4.2928261000000001       | -3.7976847000000000 | -1.0411542000000000      | O | 1.4575172999999999   | -4.5158431999999999 | 3.3711970999999998       |
| H | 3.5657462999999998       | -4.3389581000000002 | -1.2364180000000000      | C | 0.37353966E+00       | 0.99952620E-01      | -0.10218593E+00          |
| H | 4.0983014999999998       | -3.5549637999999999 | -0.11799930000000000     | O | 0.68198961E+00       | 0.70957797E+00      | -0.88761873E+00          |
| O | -0.87298587000000005     | -2.2396913999999999 | 4.7667165000000002       | H | 0.24103436E+01       | -0.17690953E+01     | 0.17385482E+00           |
| H | -1.0965549000000001      | -3.1508199000000001 | 4.7895415999999997       | H | 0.24679155E+00       | 0.54333840E+00      | 0.81692444E+00           |
| H | 9.5095872999999997E-002  | -2.4126878999999999 | 4.8897659999999998       | H | 0.40829329E+01       | 0.48823245E+00      | -0.64705085E+00          |
| O | 0.8057267599999999       | -8.8880704999999995 | 3.3734886999999998       | H | -0.15450947E+01      | 0.67634522E+00      | -0.31923849E+00          |
| H | 0.93932888000000003      | -8.0466519999999999 | 2.8694861000000000       | H | 0.25342077E+00       | -0.18808489E+01     | -0.86550518E+00          |
| H | 1.5736521999999999       | -9.3529496000000005 | 2.9292932999999999       | H | -0.74177949E+00      | -0.26046862E+01     | 0.0611269E+01            |
| O | 4.8250956000000000       | -2.2882394000000001 | 1.1925105000000000       | O | 1.1194001000000000   | -6.6605403000000001 | 1.6632690000000001       |
| H | 4.5547591000000001       | -1.4837562000000000 | 1.7471010000000000       | H | -6.2068725999999996  | -6.7606026000000004 | 2.5599929000000001       |
| H | 5.6785215999999998       | -1.9294072000000000 | 0.8266854399999999       | H | 1.3239150000000000   | -5.9153485999999997 | 1.0724879000000000       |
| C | 0.17573252E+01           | -0.34471008E+01     | 0.27094534E+01           | O | -1.2678548999999999  | -4.8128671000000001 | 4.0269162999999999       |
| C | 0.20337527E+01           | -0.20850401E+01     | 0.32308399E+01           | H | -0.36645823000000000 | -4.7392620000000001 | 3.6865011000000001       |
| O | 0.19686685E+01           | -0.11505246E+01     | 0.22099043E+01           | H | -1.7511446999999999  | -5.4999007000000004 | 3.4897274000000000       |
| C | 0.17331119E+01           | -0.19106598E+01     | 0.97764294E+00           | O | 4.5644168000000001   | -4.8262387000000002 | 1.5044525000000000       |
| C | 0.15956051E+01           | -0.33860256E+01     | 0.13313413E+01           | H | 4.7049631999999999   | -3.9124840999999999 | 1.3296517000000001       |
| O | 0.22267031E+01           | -0.16199571E+01     | 0.44109751E+01           | H | 0.4010933999999997   | -4.6161722999999997 | 2.2404046000000002       |
| C | 0.52782008E+00           | -0.13863539E+01     | 0.22666593E+00           | O | -0.42930496000000001 | -6.3381369000000003 | -0.56327969000000000     |
| O | -0.67628262E+00          | -0.17303058E+01     | 0.95954814E+00           | H | -0.28886172999999998 | -5.4459415000000000 | -0.21308856000000001     |
| O | 1.3833679999999999       | -4.3254403999999997 | 0.43643728999999998      | H | -0.14581717999999999 | -6.7606026000000004 | 0.23122593000000000      |
| O | 1.7634190999999999       | -4.4651931999999999 | 3.5856083000000001       | O | 3.8967181000000002   | -5.3011054000000000 | 4.3815233999999998       |
| C | 0.44875389E+00           | 0.14615207E+00      | 0.21686090E-01           | H | 4.1072733000000001   | -4.4603969000000001 | 4.8646409000000004       |
| O | -0.66654917E+00          | 0.69612625E+00      | -0.70557988E+00          | H | 2.9867454000000002   | -5.1826827000000000 | 4.0492983000000002       |
| H | 0.26774671E+01           | -0.17037300E+01     | 0.39445756E+00           | O | 3.6825561000000002   | -3.8486674000000001 | -1.2481214000000000      |
| H | 0.66685604E+00           | 0.63616163E+00      | 0.98997403E+00           | H | 2.7782464000000000   | -4.0805062000000003 | -0.89510548999999995     |
| H | 0.13605108E+01           | 0.35401588E+00      | -0.57149506E+00          | H | 4.1463739000000004   | -3.6019405999999998 | -0.41110588999999997     |
| H | -0.15728201E+01          | 0.59219987E+00      | -0.38721144E+00          | O | 0.19604494000000000  | -4.0924589999999998 | -2.2316493999999998      |
| H | 0.48977558E+00           | -0.18289890E+01     | -0.75566899E+00          | H | 0.83791420999999999  | -4.6643306999999998 | -2.6932874999999998      |
| H | -0.56732258E+00          | -0.25326971E+01     | 0.15061248E+01           | H | 0.64680983000000003  | -4.1177244999999996 | -1.3155530000000000      |
| O | 1.37008700000000001      | -6.5931632000000002 | 1.7898202000000001       | O | 0.80434753000000003  | -4.3605910999999997 | 6.0682529000000001       |
| H | 1.5134027000000001       | -5.9621056000000001 | 2.4735046999999999       | H | 1.3783285999999999   | -5.0623072999999996 | 6.2752518999999998       |
| H | 1.4014470999999999       | -5.9657837999999996 | 1.0264891000000000       | H | 0.91022051000000004  | -4.3973012000000002 | 5.1083413999999996       |
| O | -1.2664901000000000      | -4.7630046000000004 | 3.7653075999999999       | O | 0.35544585000000000  | -6.7830887999999998 | -9.1765997000000002E-002 |
| H | -0.29573680000000002     | -4.8955589000000002 | 3.7385286000000000       | H | 2.6290648000000001   | -6.8785162000000000 | 0.11246510999999999      |
| H | -1.6644664000000000      | -5.3319742000000003 | 3.0589803000000000       | H | 3.9278430000000002   | -6.1643961000000003 | 0.58636801000000005      |
| O | 4.2157039999999997       | -5.2213329000000002 | 4.4368027999999997       | O | -0.9841436599999998  | -2.4983732999999999 | 5.3410399000000002       |
| H | 4.3575261000000003       | -4.3930759000000004 | 5.0072343999999998       | H | -1.1510254000000000  | -3.3369599000000001 | 4.8126344000000003       |
| H | 3.3487621999999999       | -5.0434502999999999 | 4.0246452000000001       | H | -0.18352663999999999 | -2.7659323999999999 | 5.7829028999999998       |
| O | 3.7357566000000002       | -3.9866299999999999 | -1.1426002000000000      | O | 4.8854642000000004   | -2.2791895000000002 | 0.88713781999999997      |
| H | 2.8822600999999999       | -4.1038122000000001 | -0.6308450500000002      | H | 4.8532083999999998   | -1.4424093000000000 | 1.3799387000000001       |
| H | 4.3876264999999997       | -3.7380418999999998 | -0.4688515799999999      | H | 5.8494804000000000   | -2.1215411000000000 | 0.61236809000000003      |
| O | -0.71712814000000003     | -6.6655547999999998 | -0.3221548000000002      | O | 4.5609169999999999   | -7.6731945000000001 | 2.9307180000000001       |
| H | -0.10169015000000001     | -5.9420232000000004 | 1.8807896000000001E-002  | H | 4.3092791000000004   | -6.9558086000000001 | 3.4918589000000000       |

H 5.233793999999996 -7.202792699999998 2.4317049000000002
